# Supplementary material
Source: bioRxiv or medRxiv preprint supplement (https://www.biorxiv.org/highwire/filestream/99397/field_highwire_adjunct_files/0/325399-1.pdf)
Supplement: Supplementary file [file 325399-1.pdf]

**A**

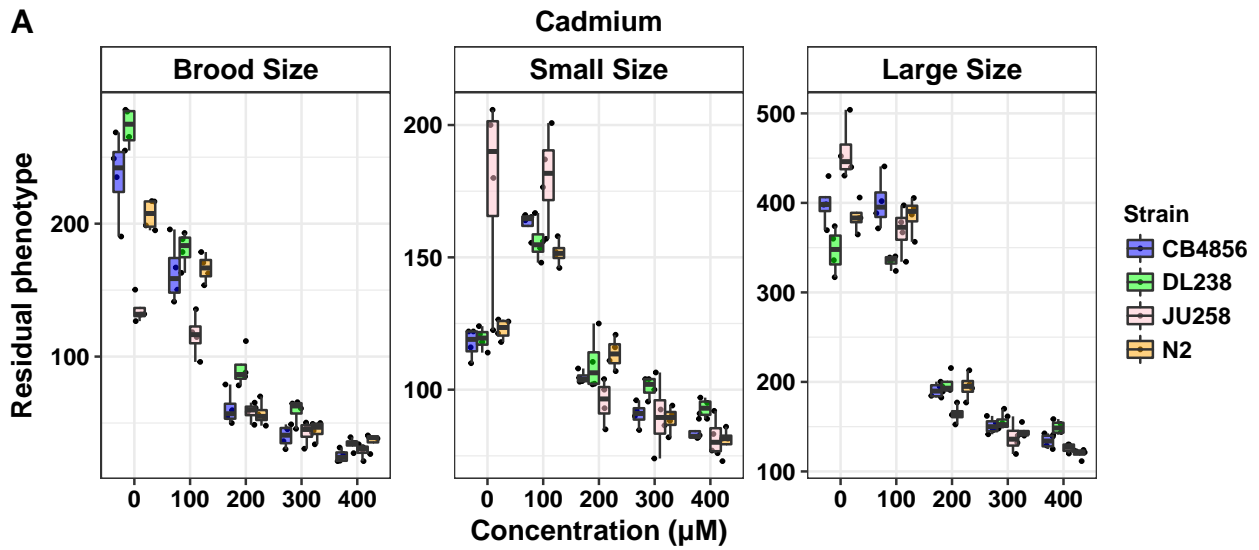

**B**

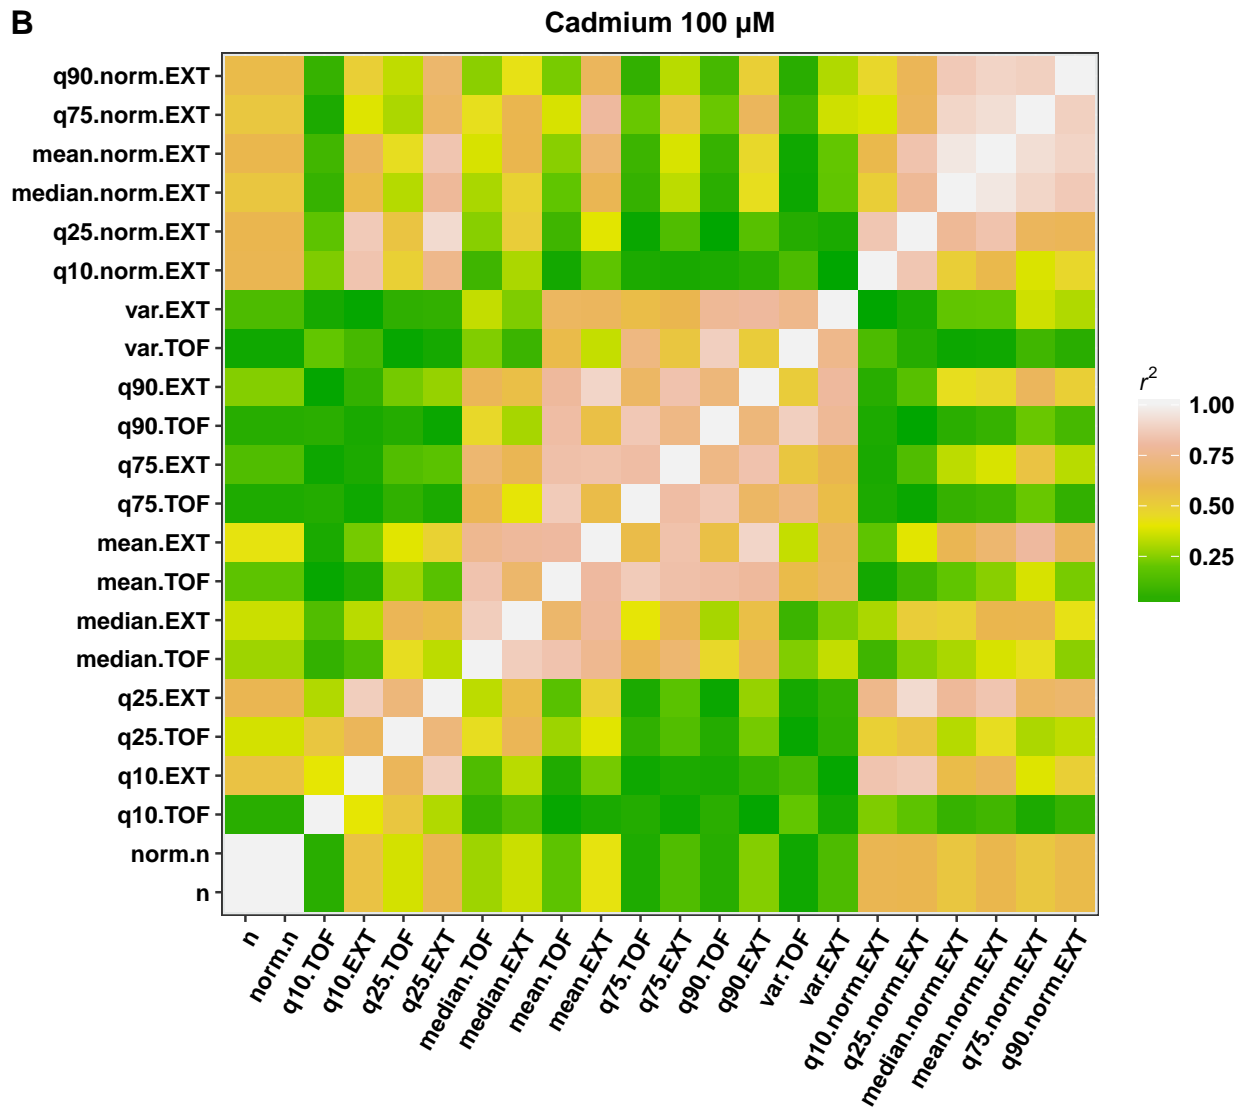

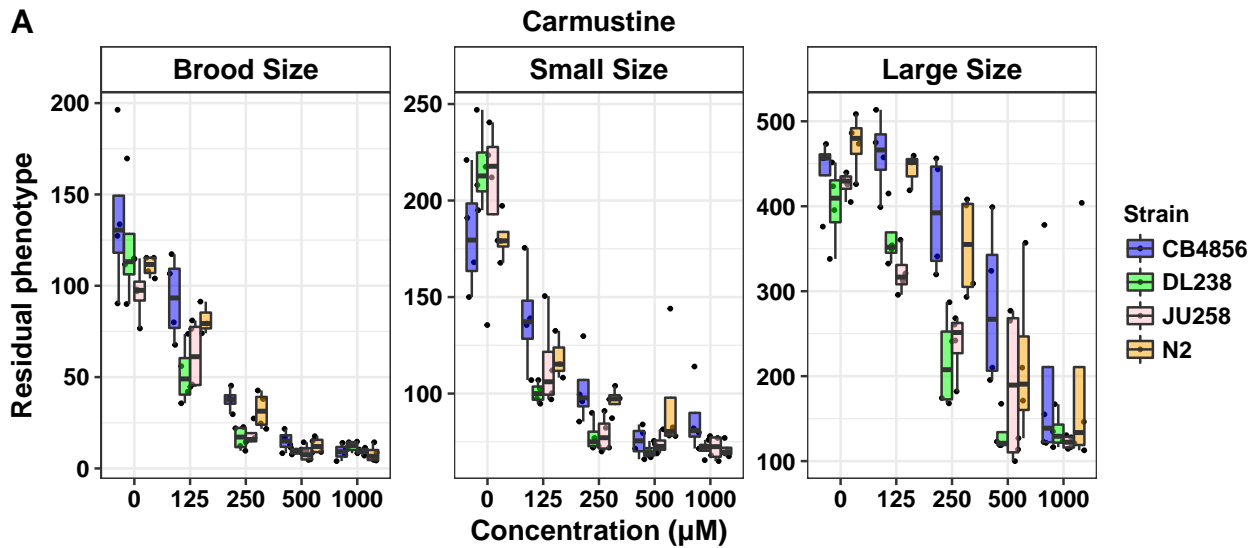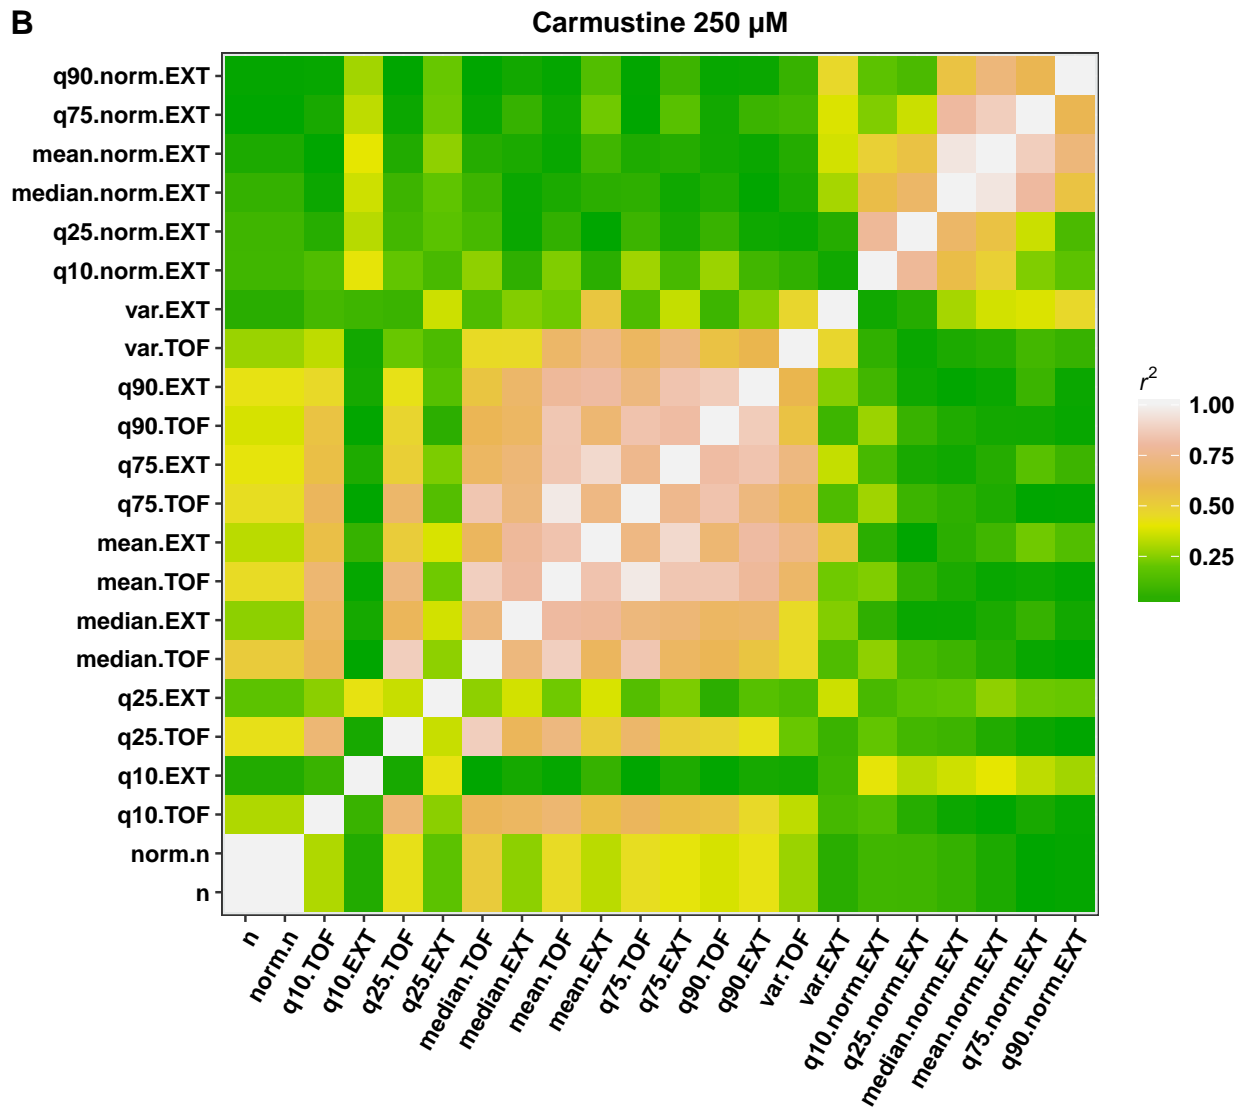

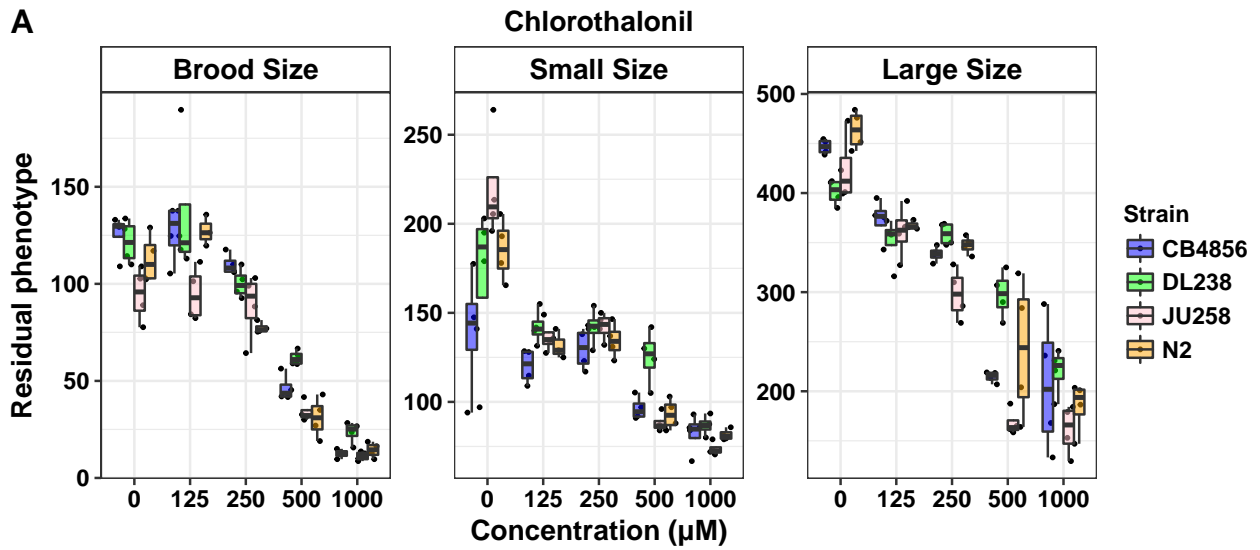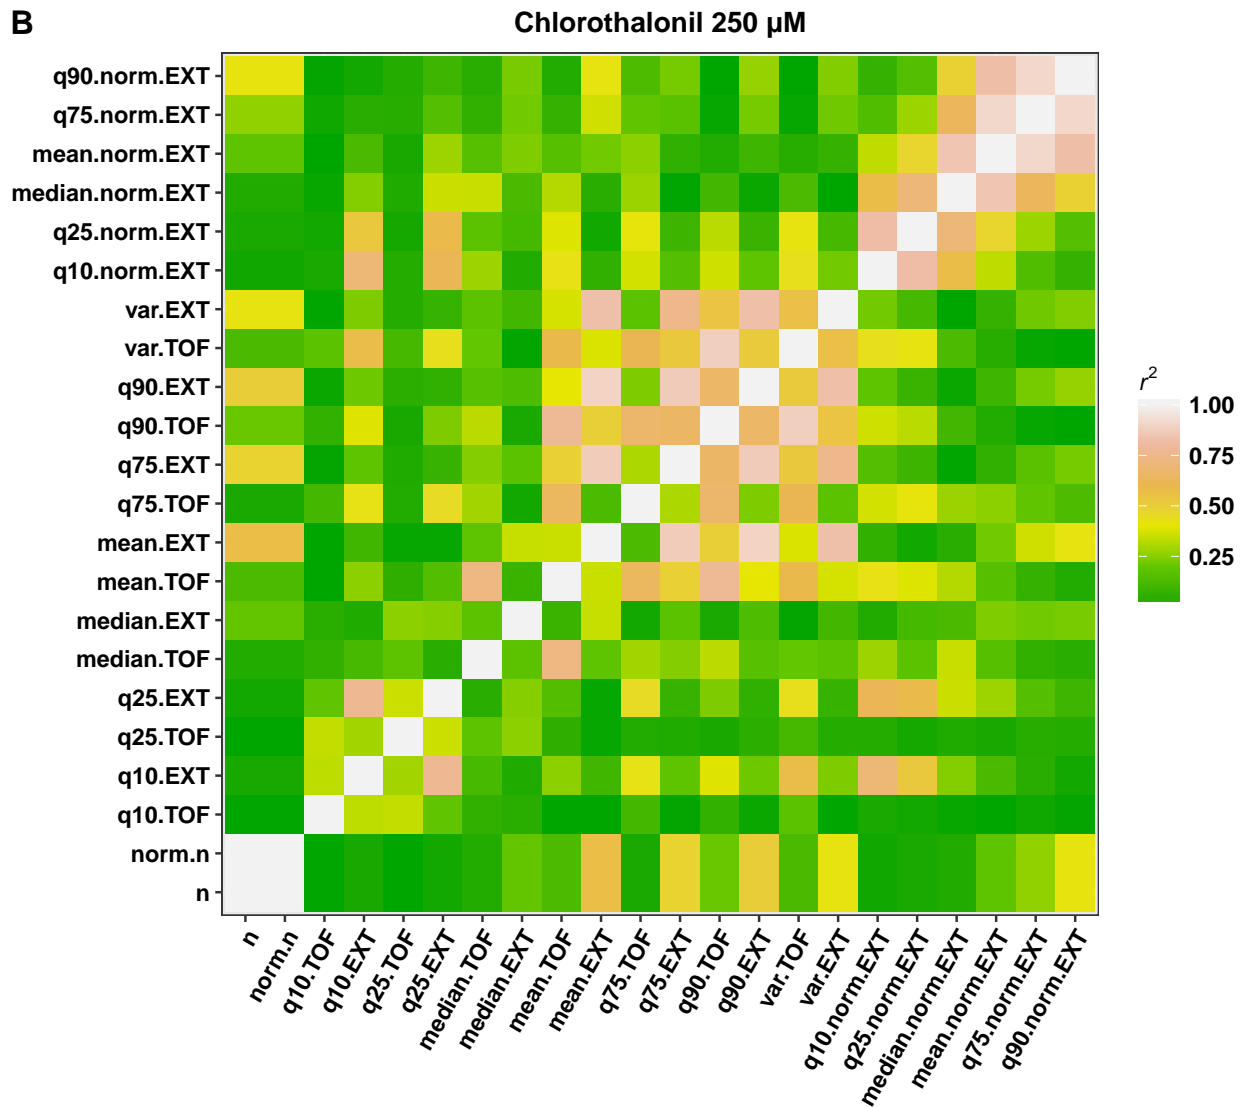

**A**

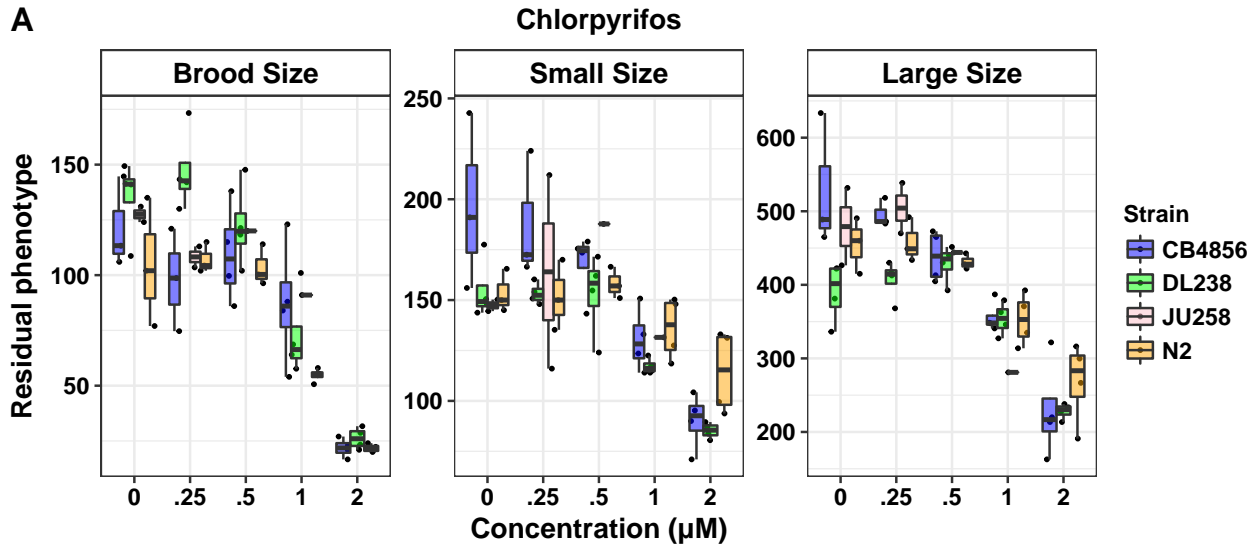

**B**

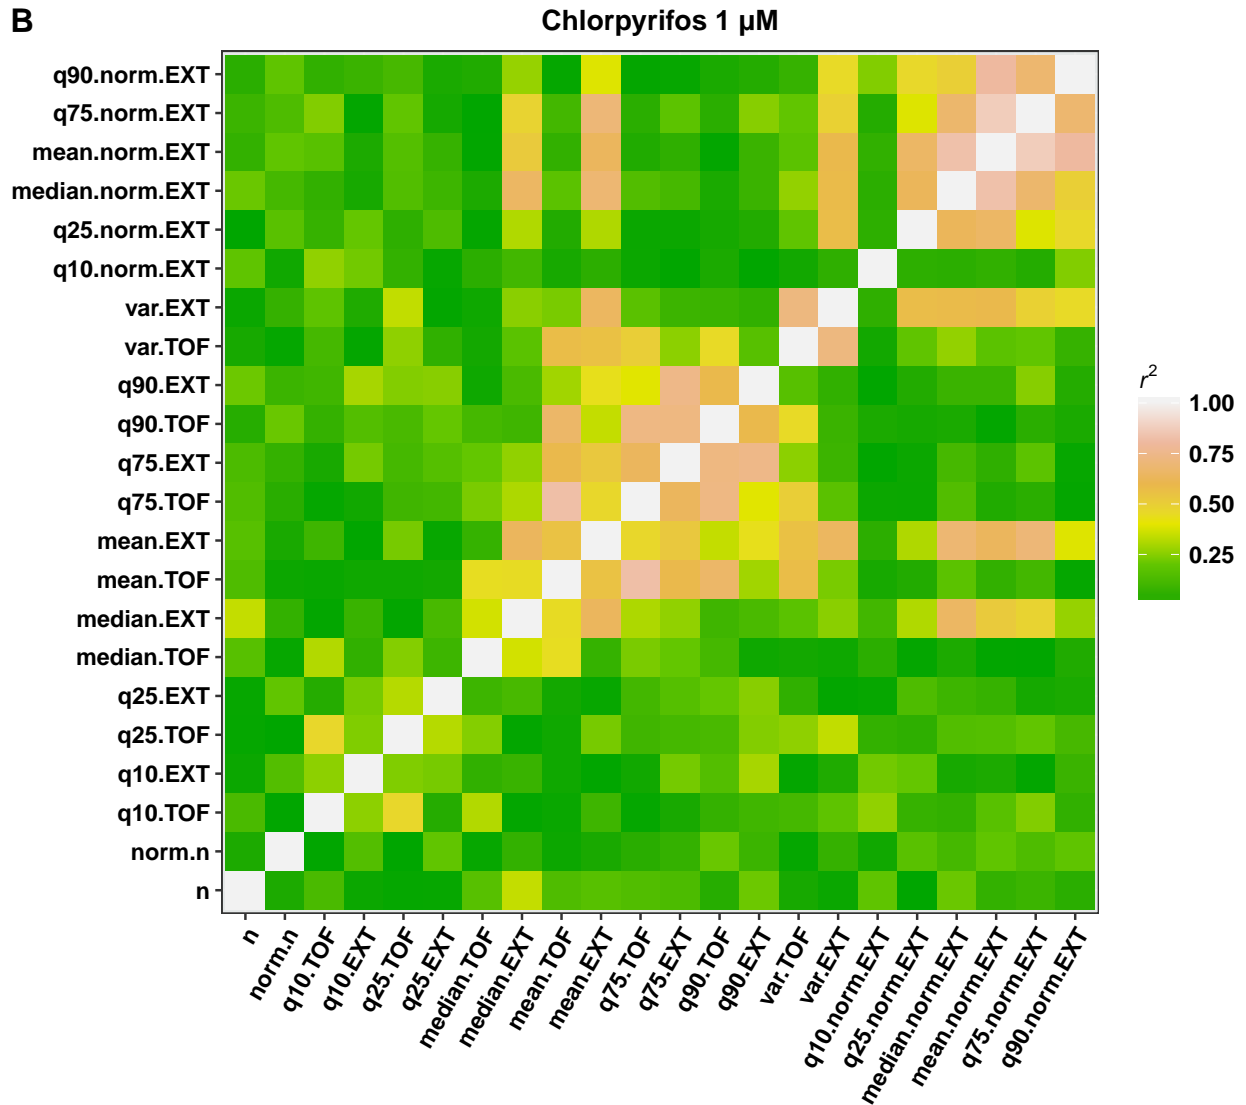

**A**

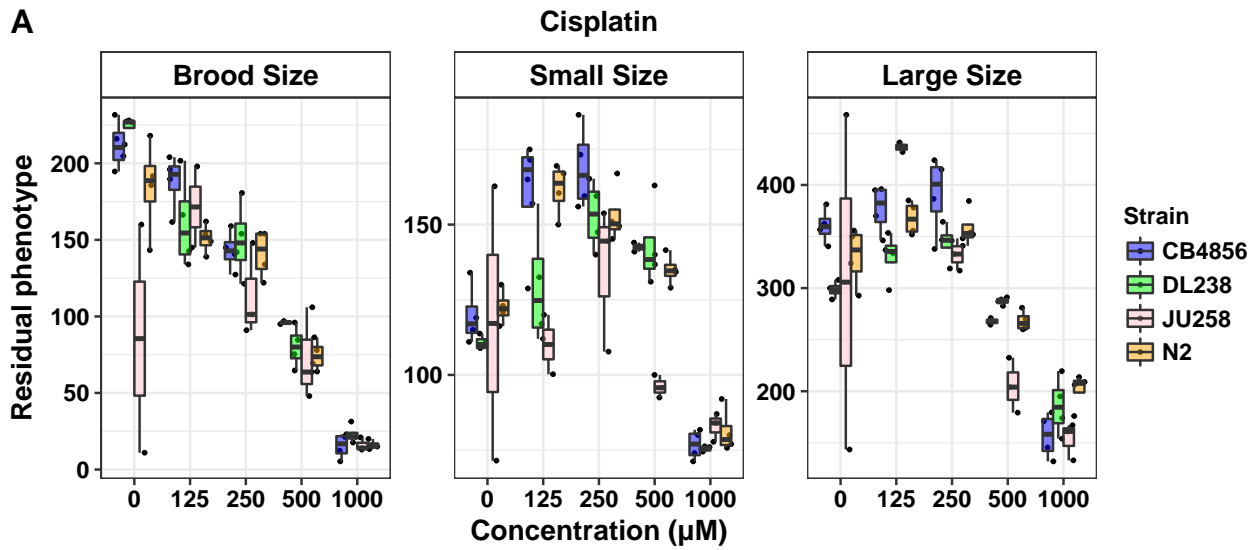

**B**

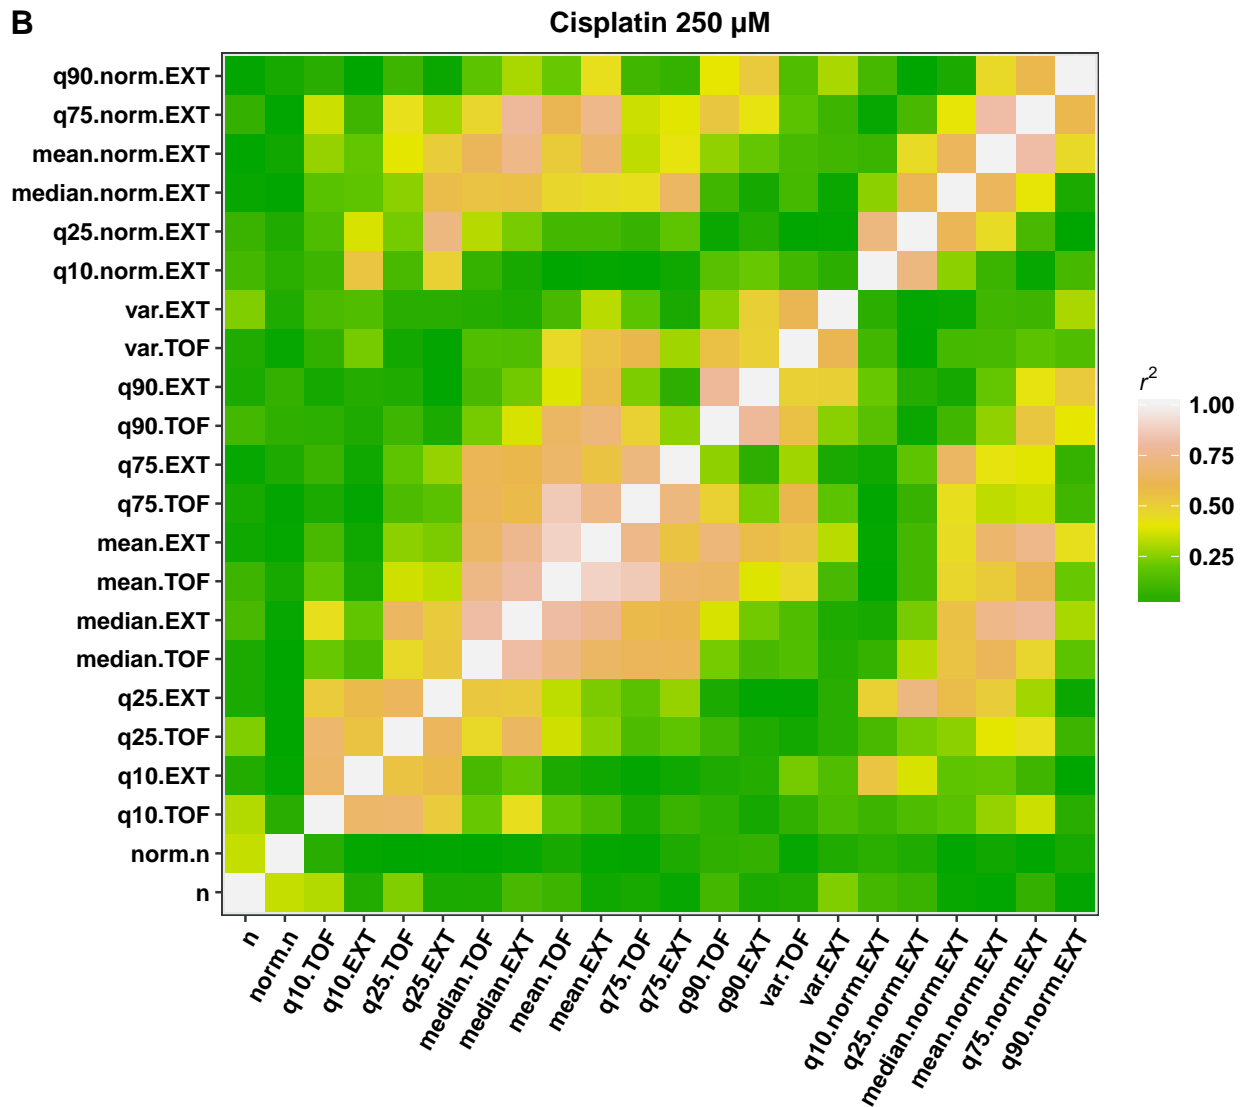

**A**

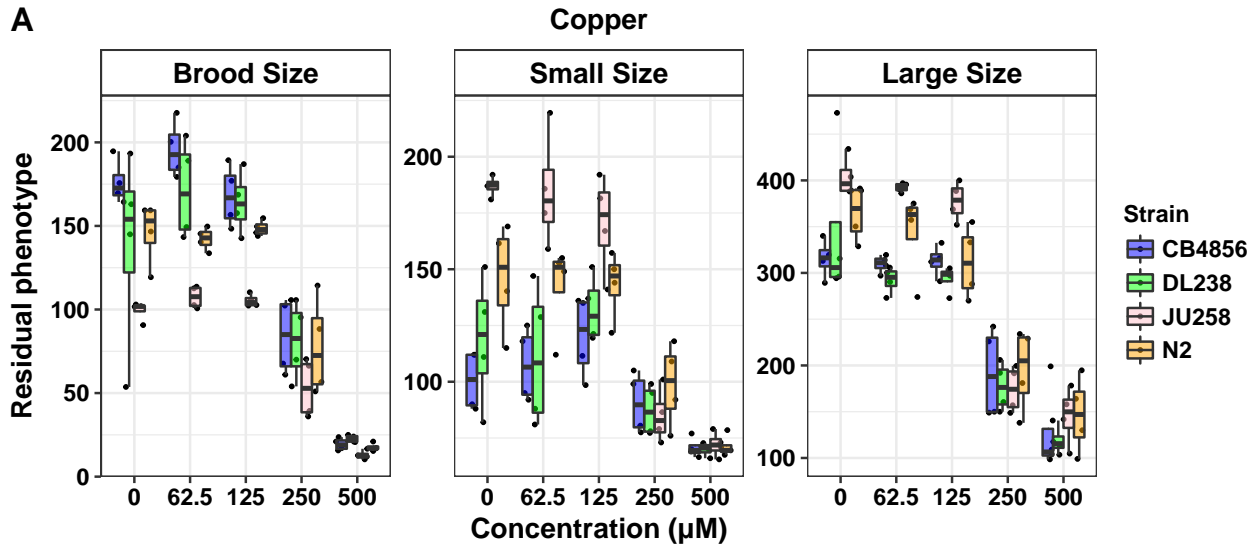

**B**

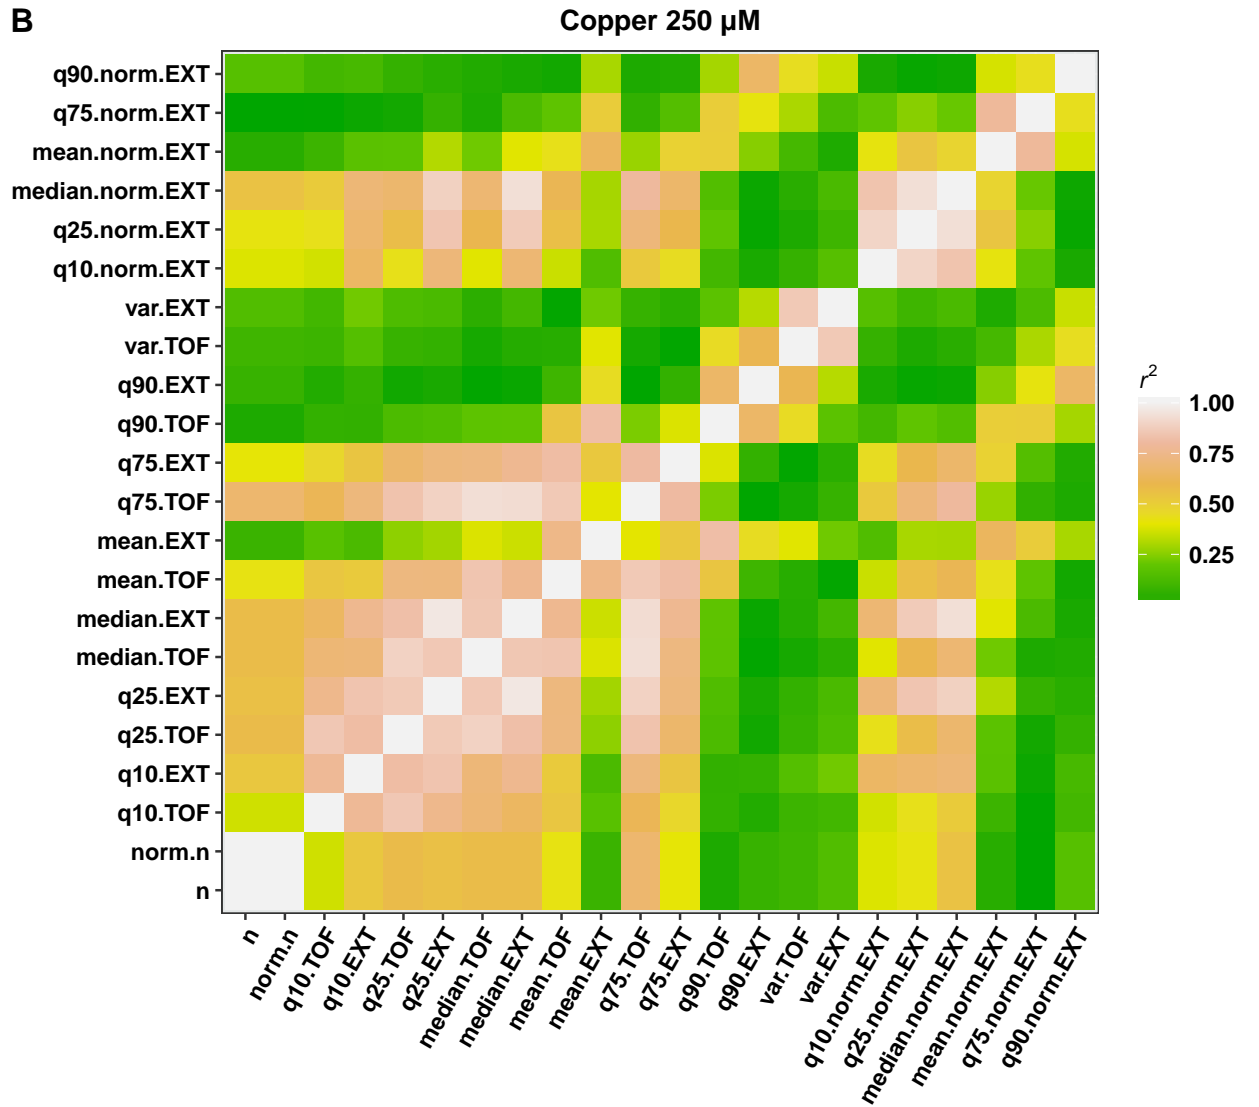

**A**

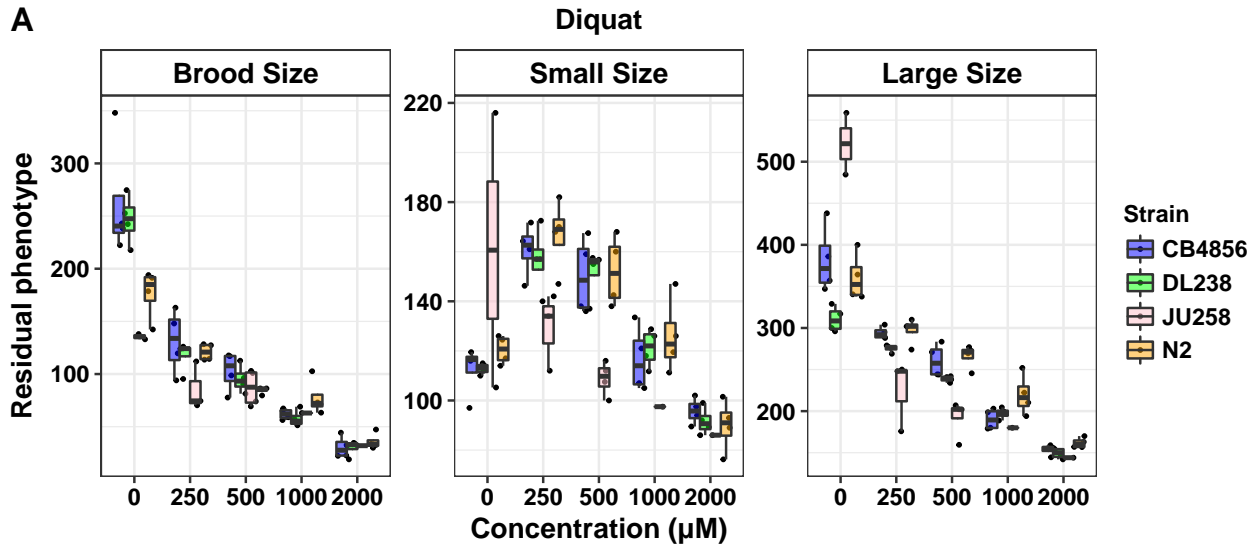

**B**

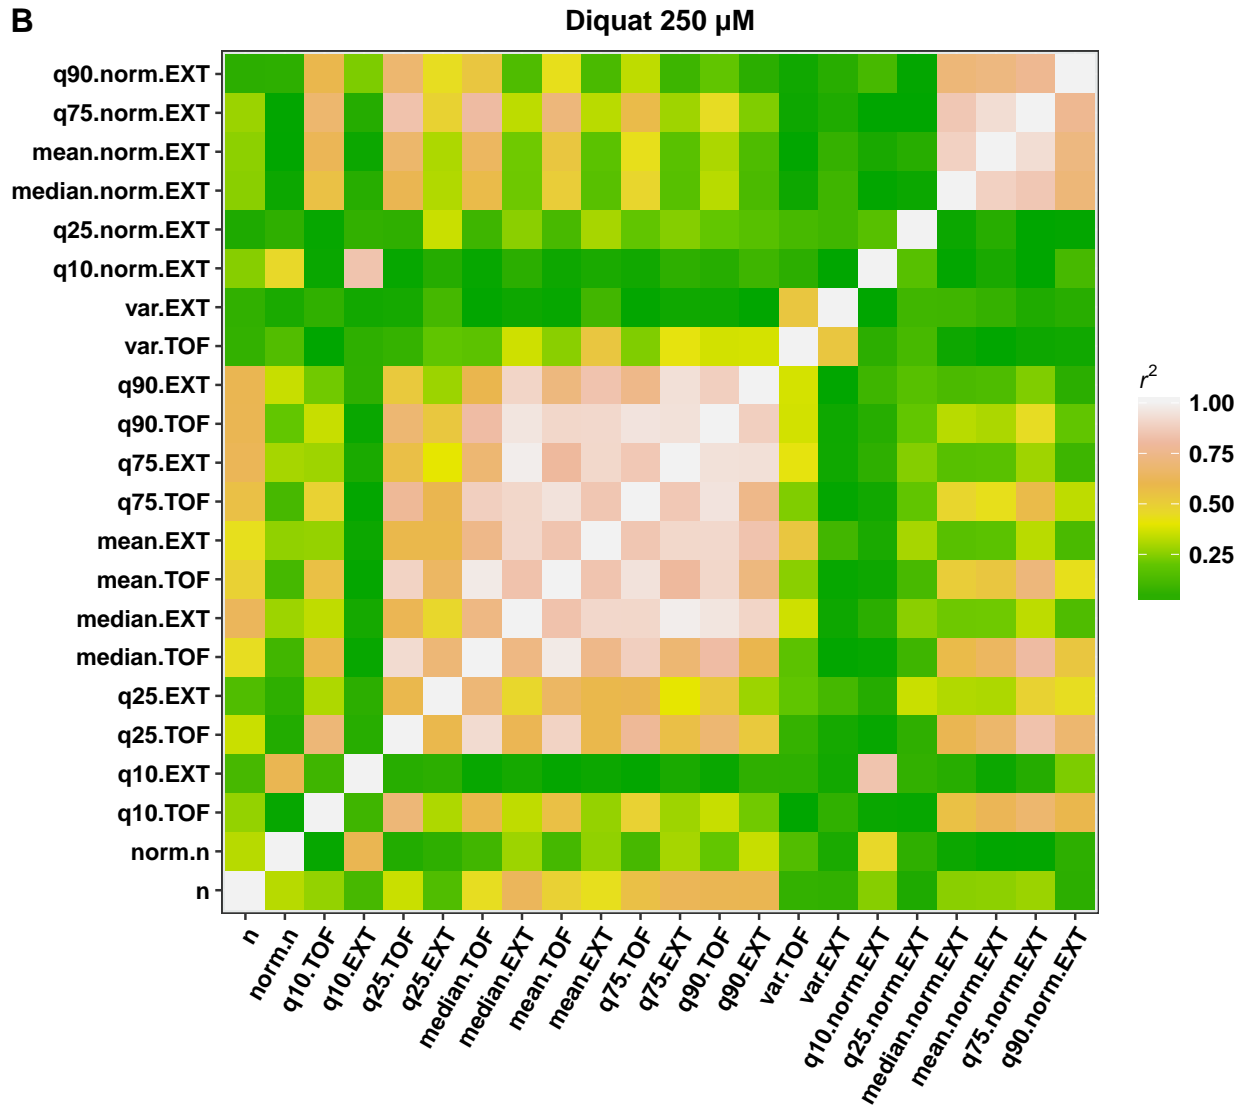

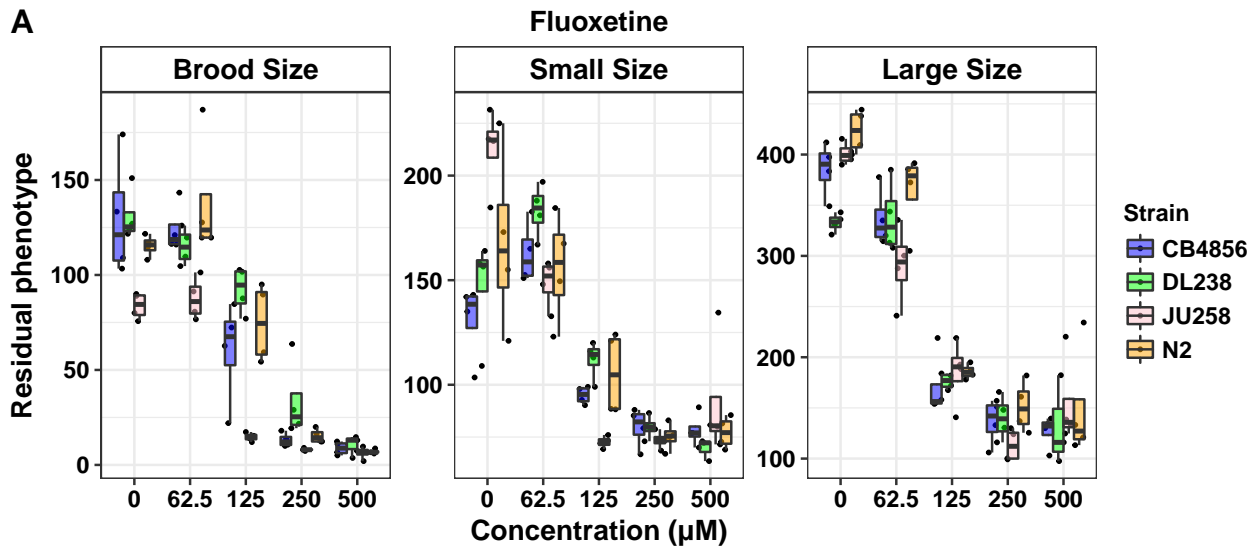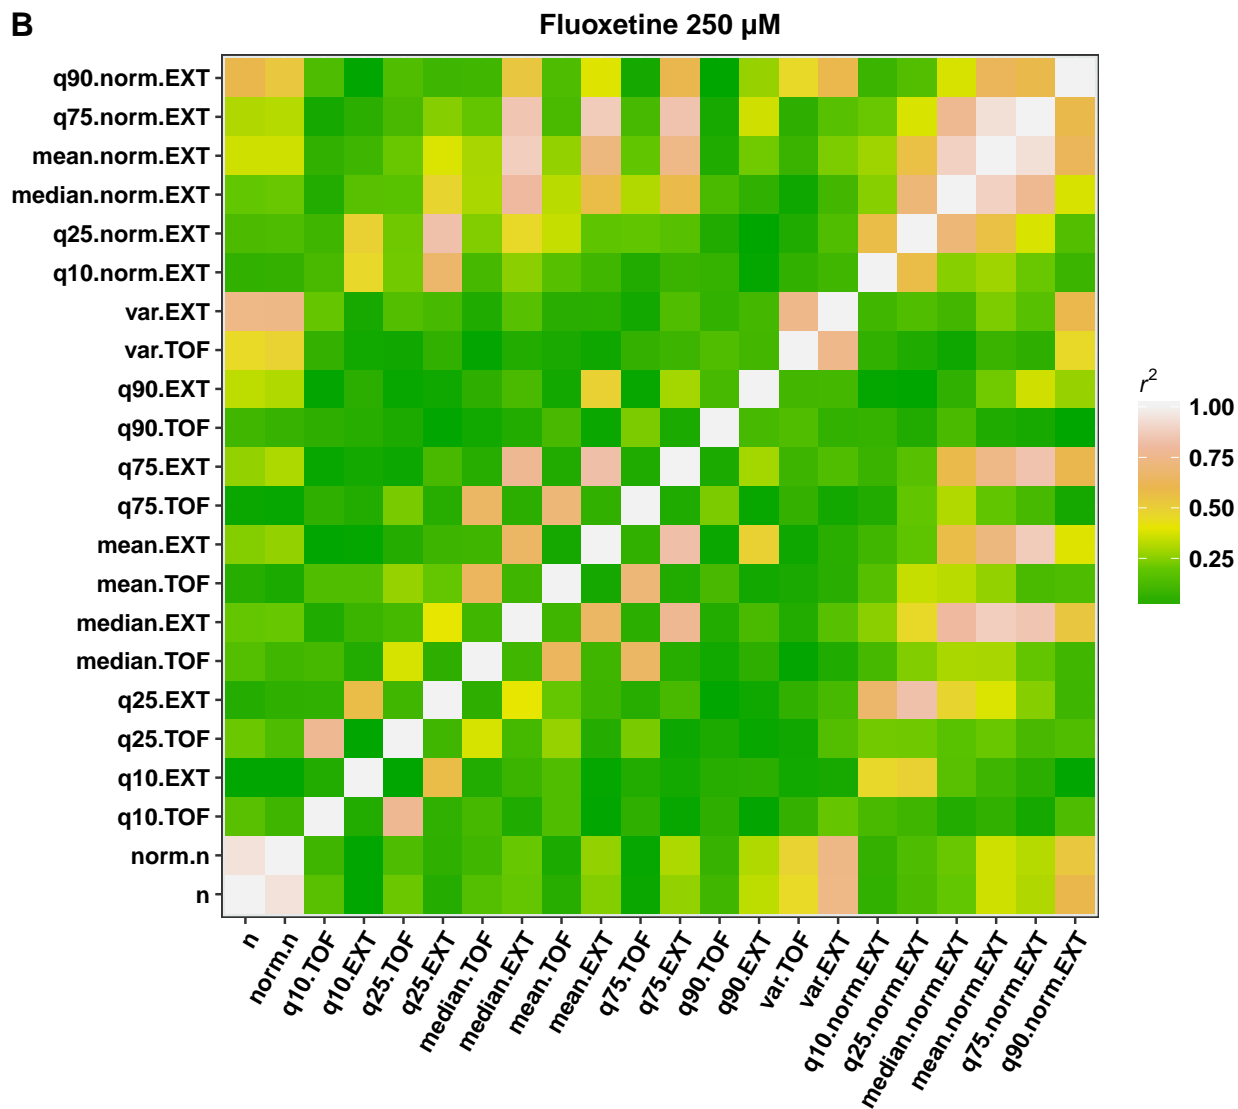



**A**

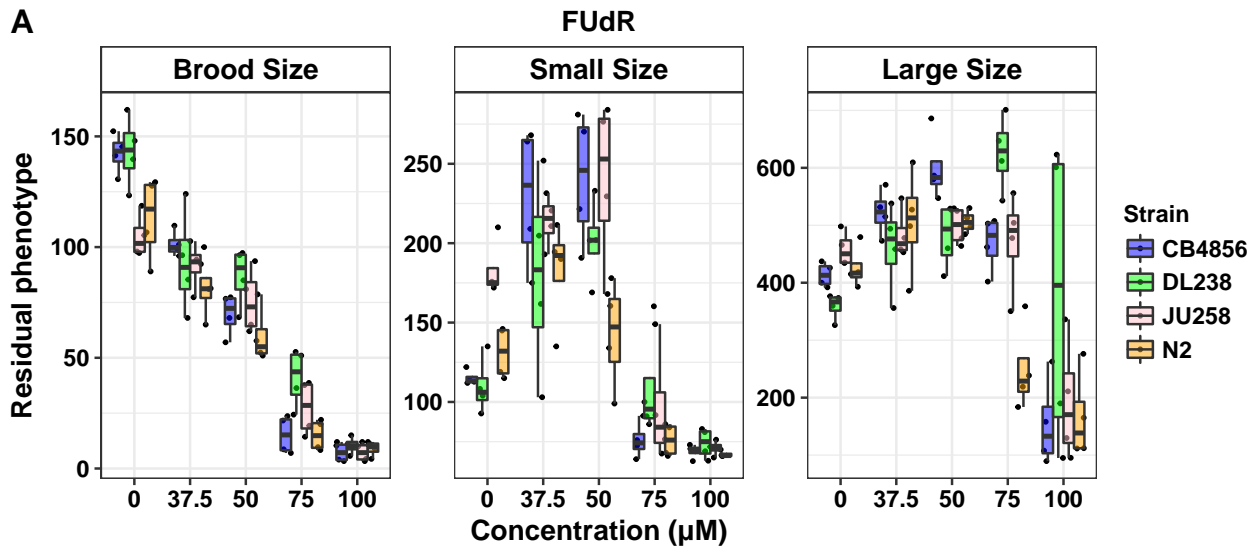

**B**

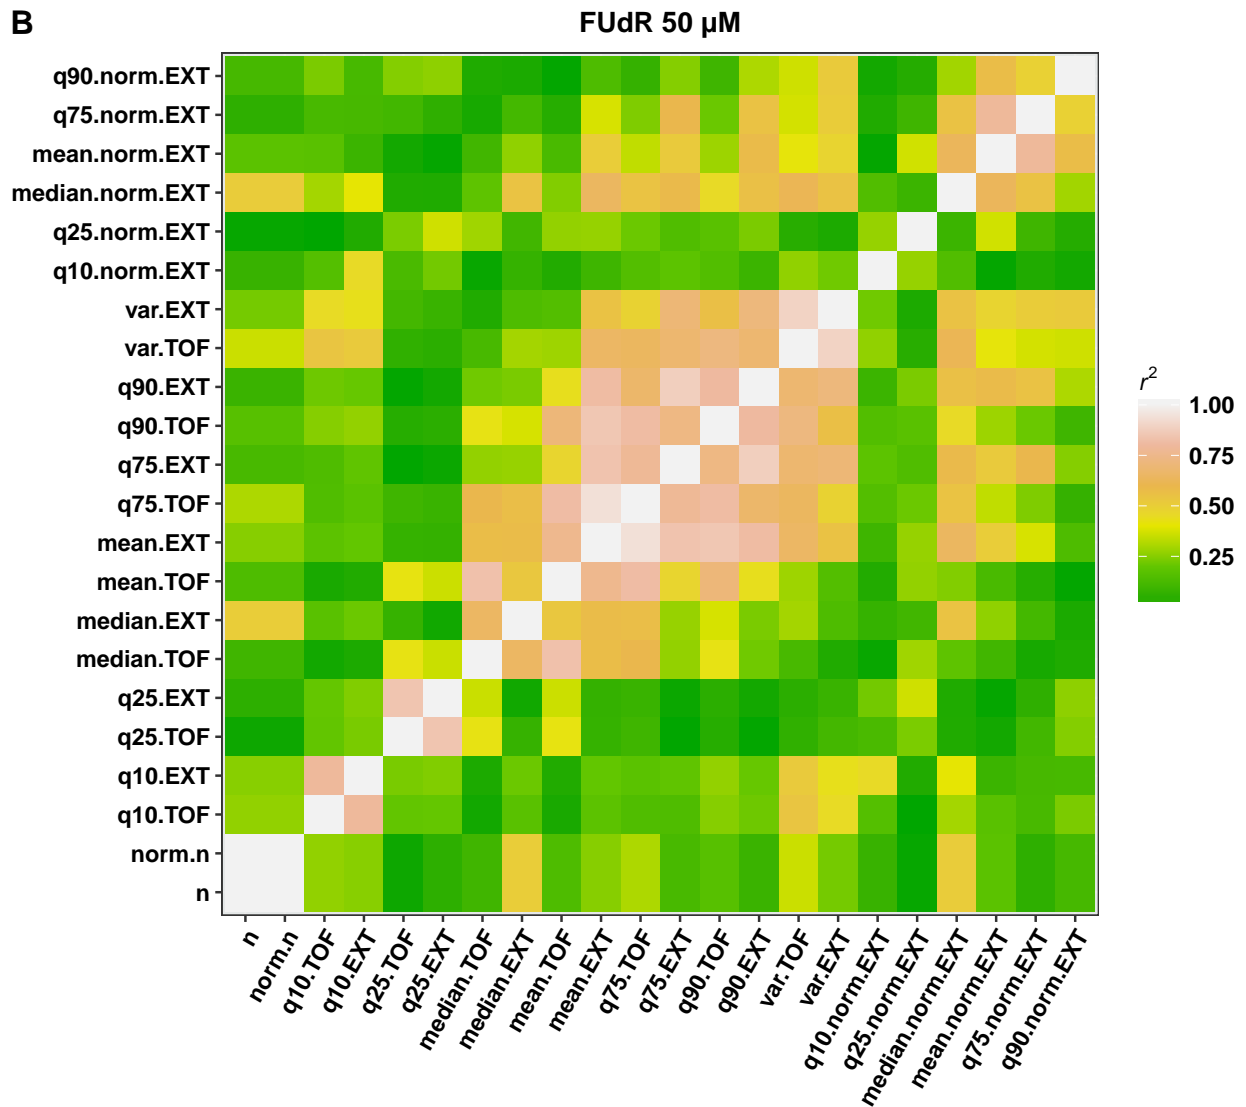

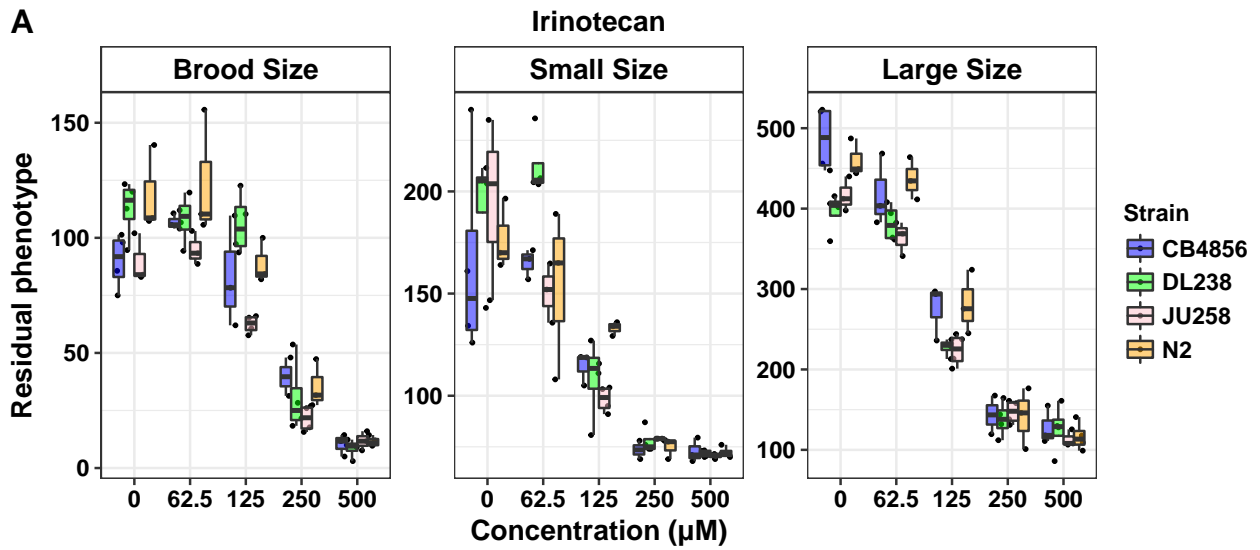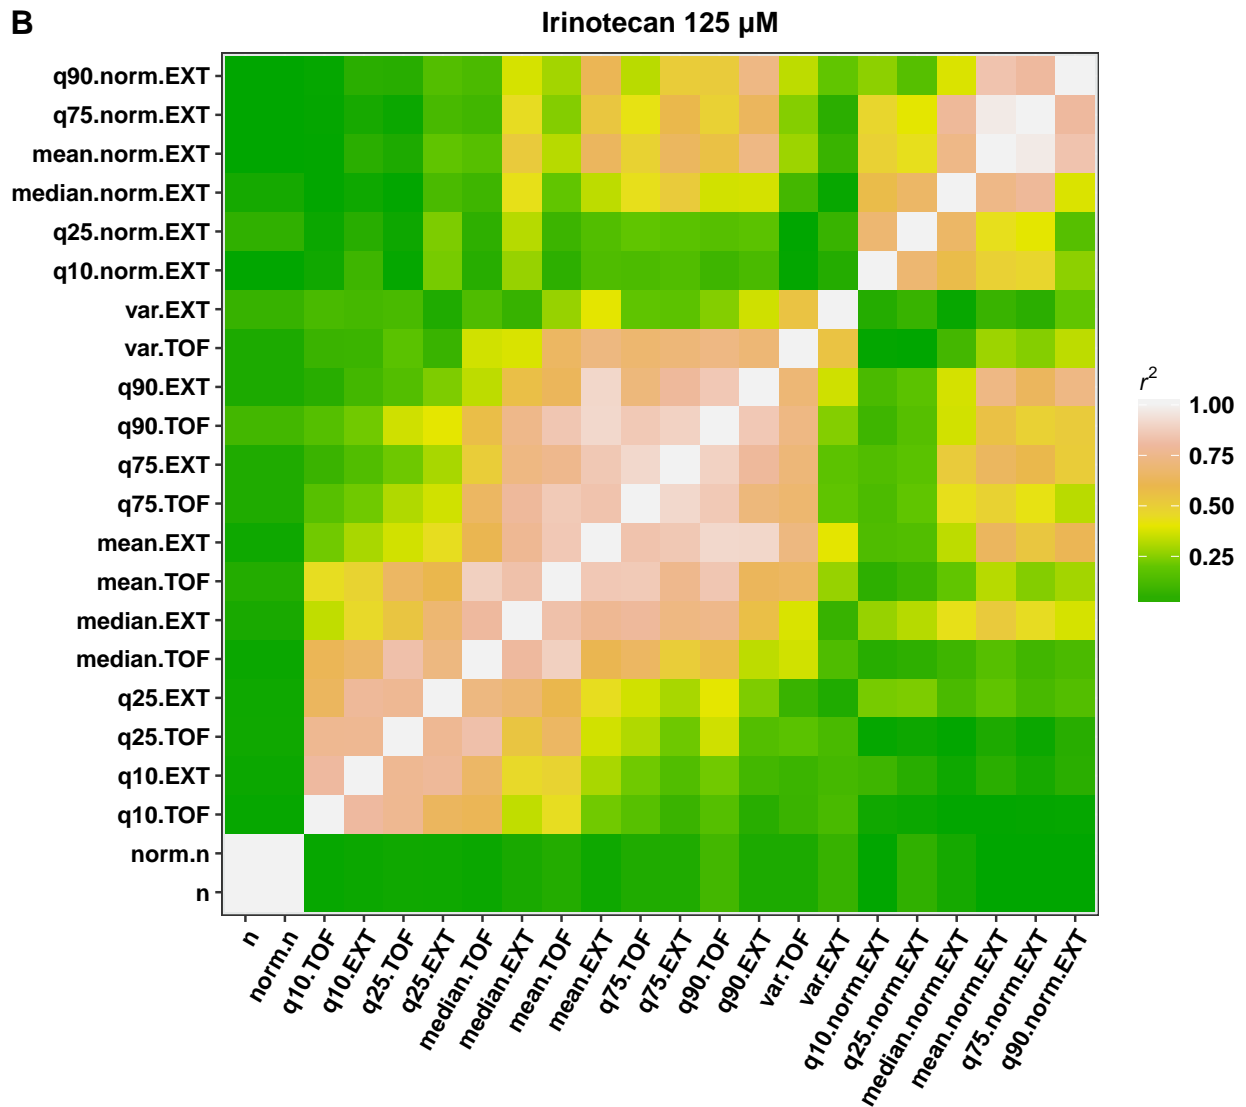

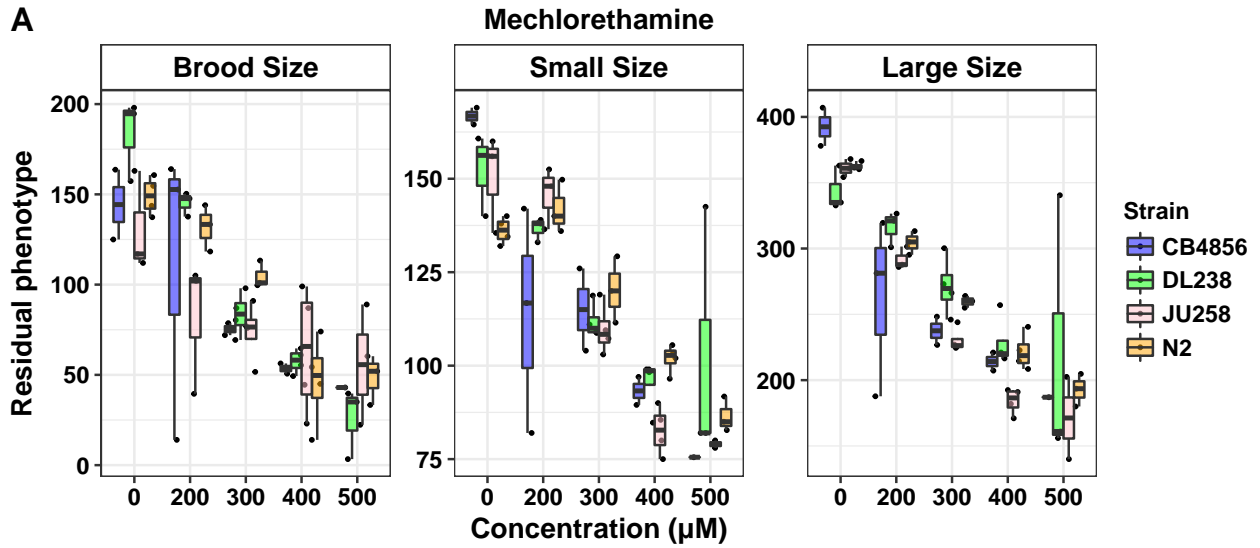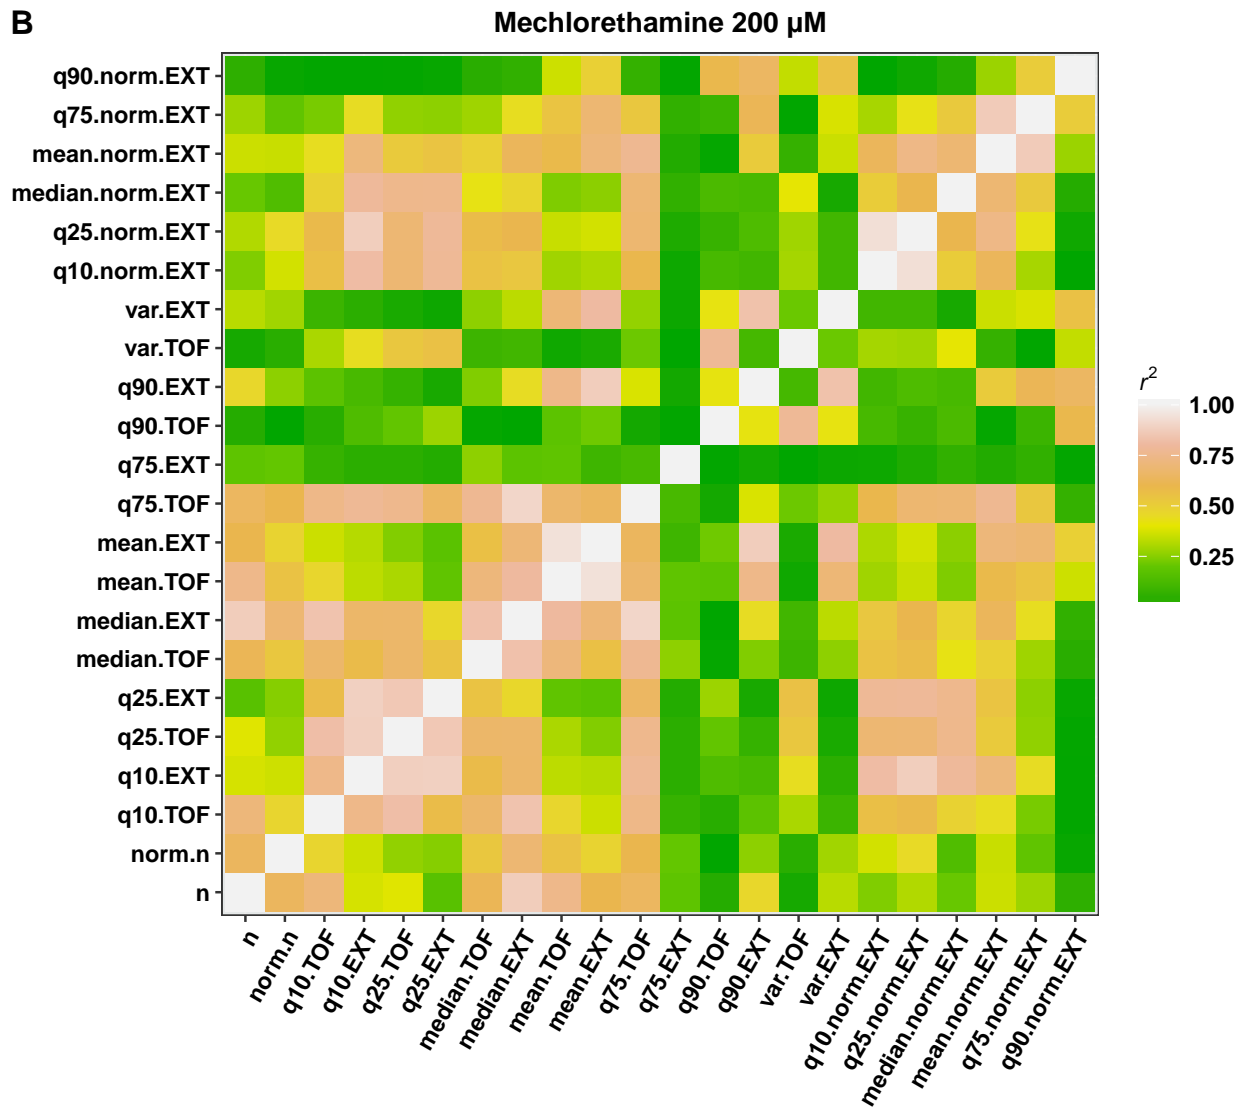

**A**

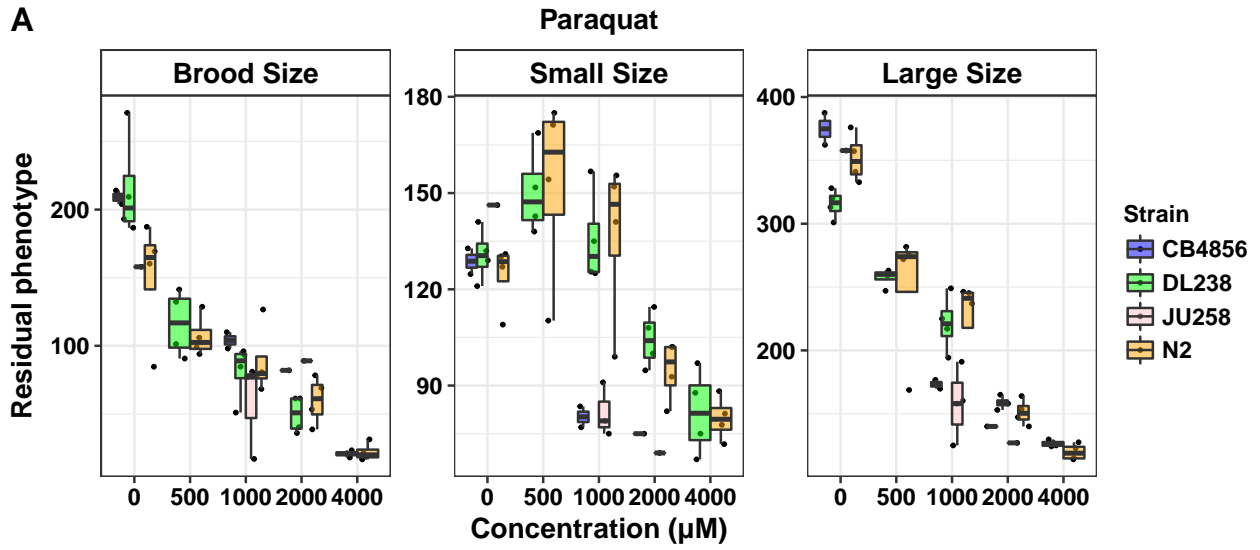

**B**

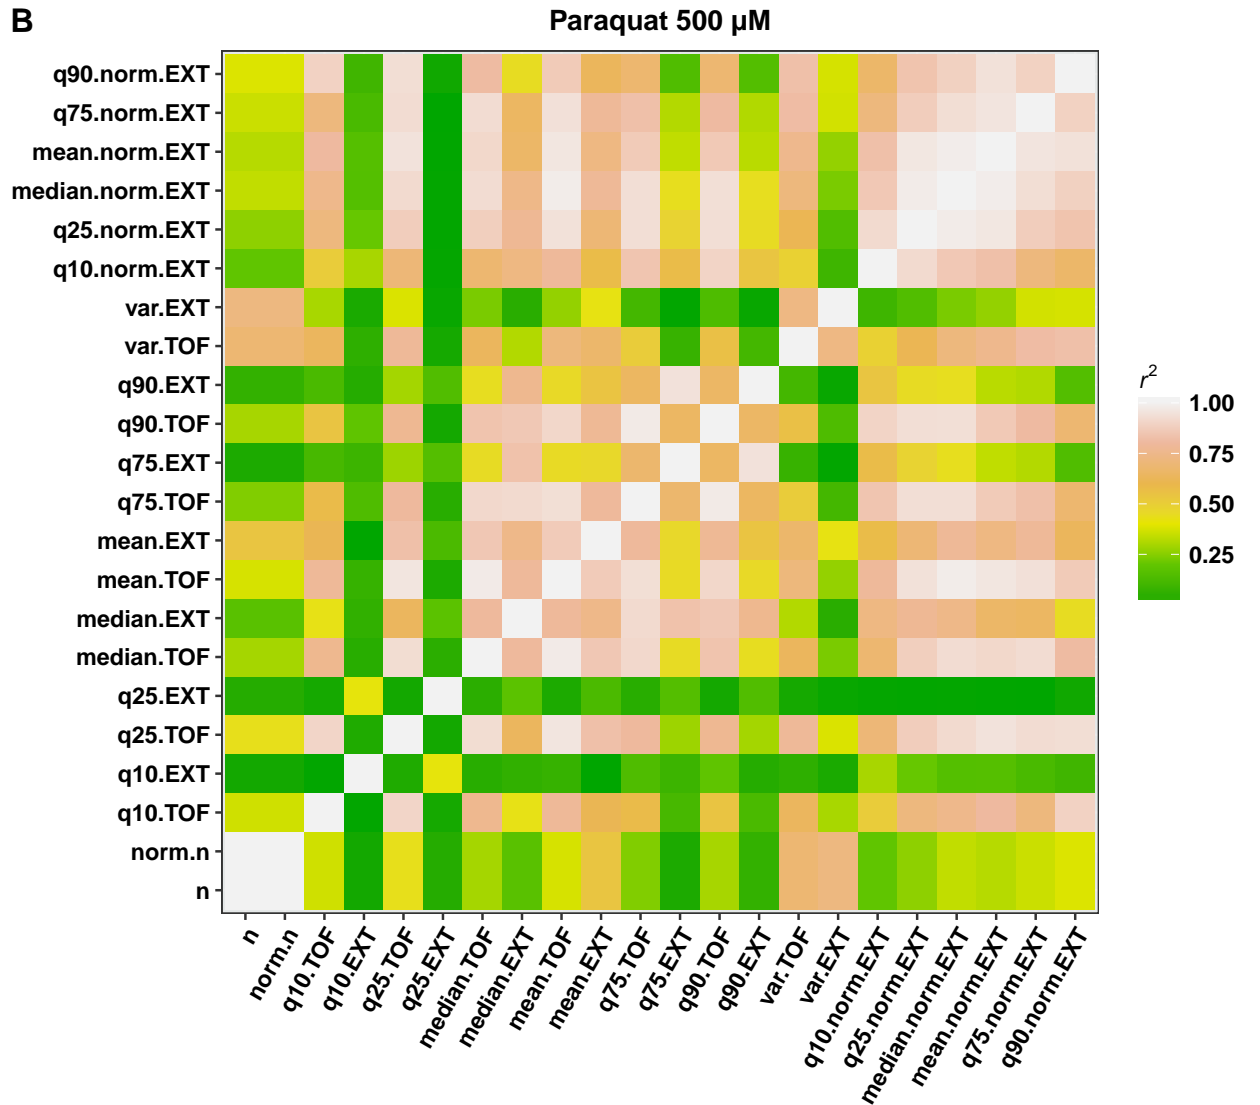

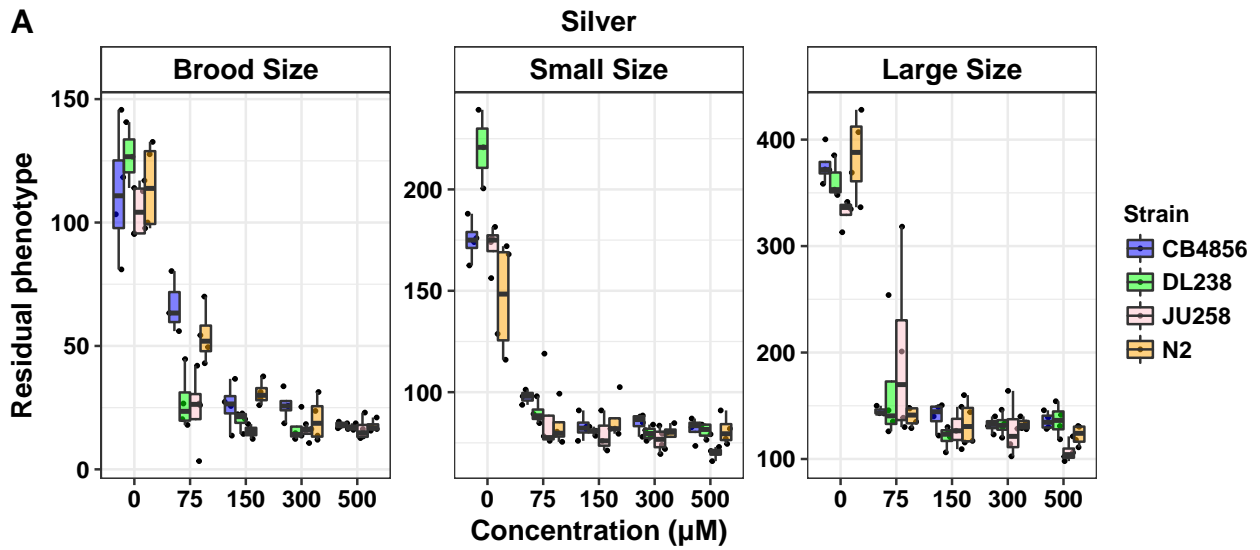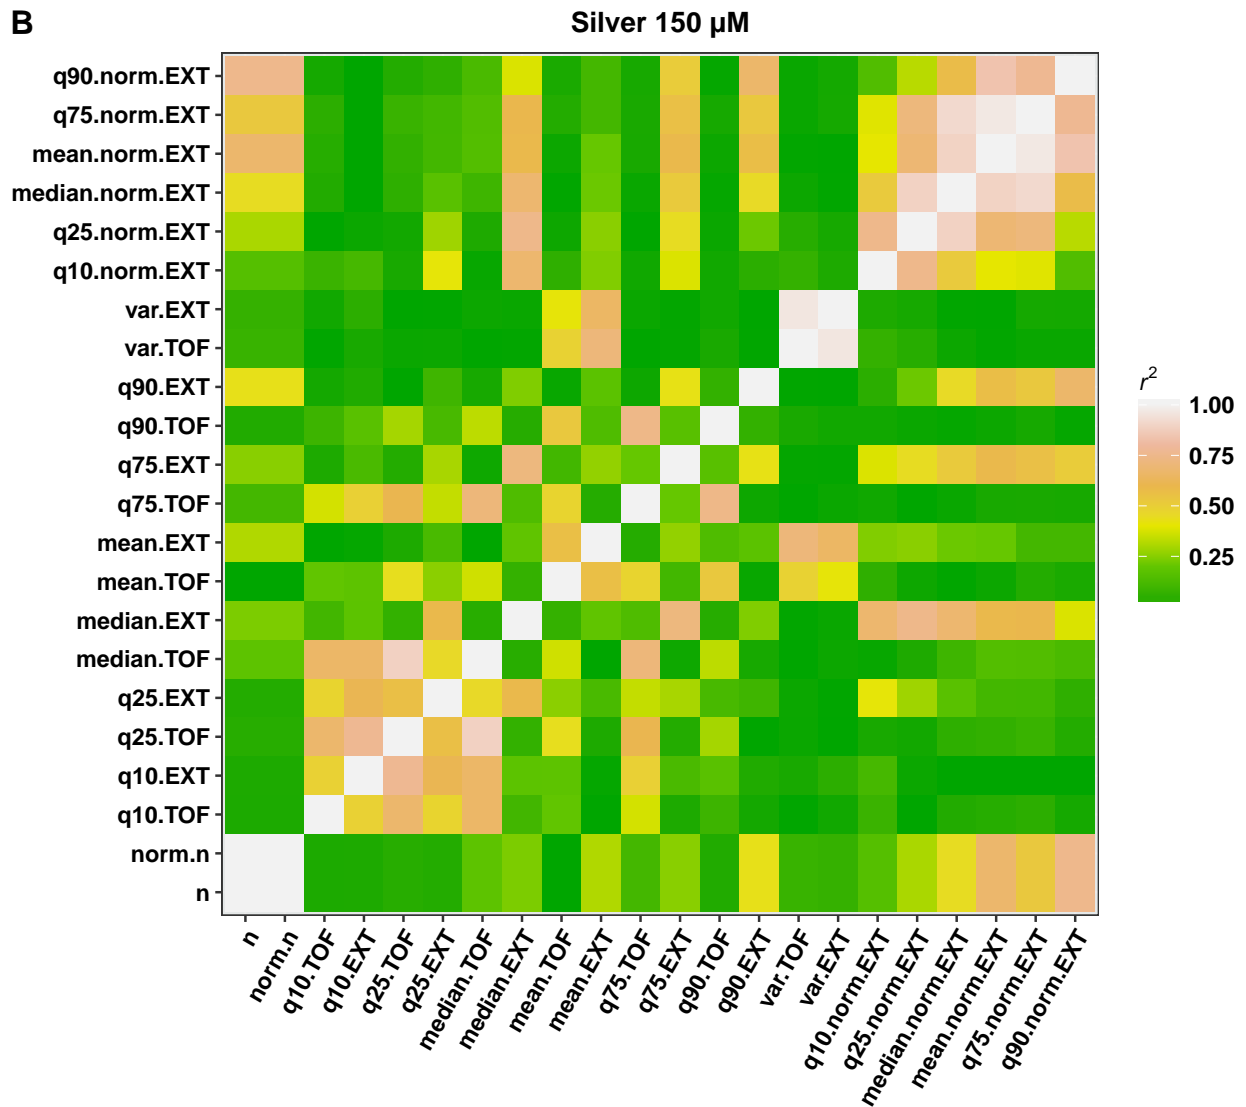

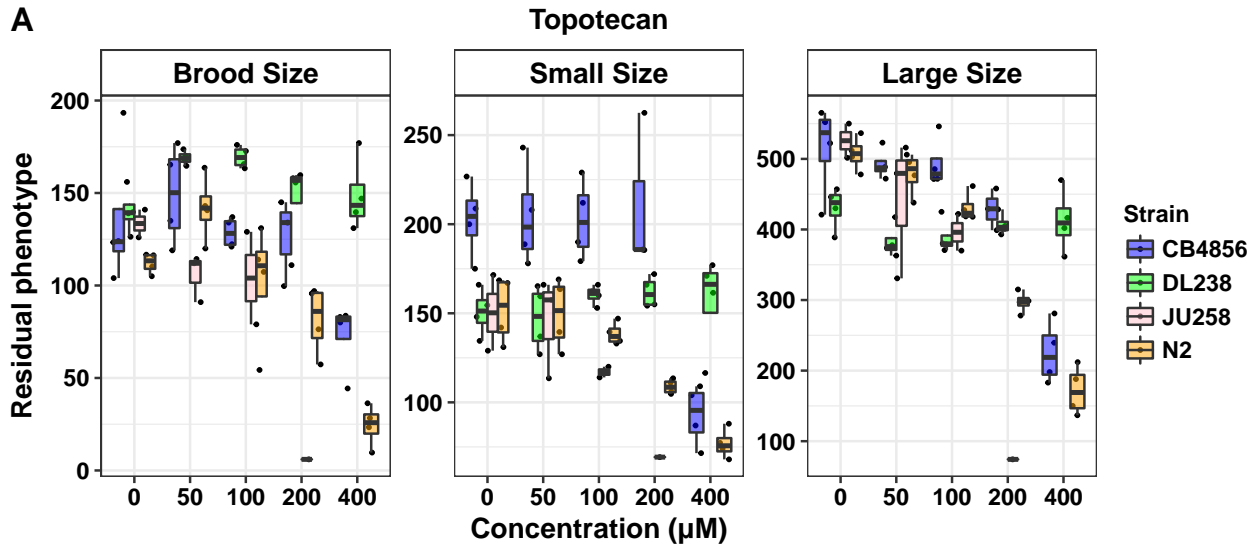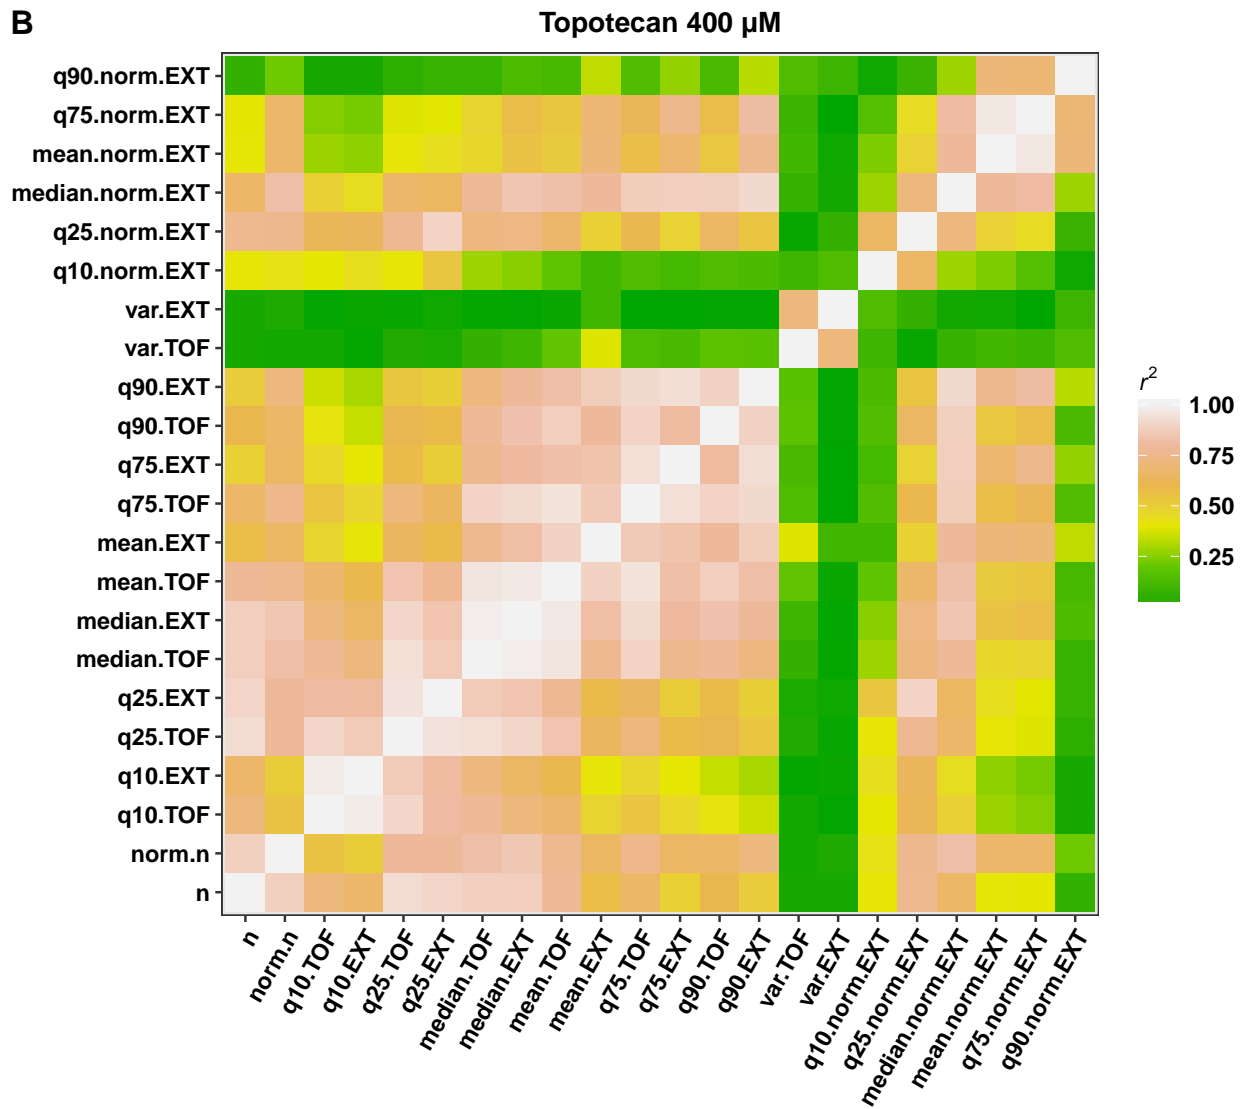

**A**

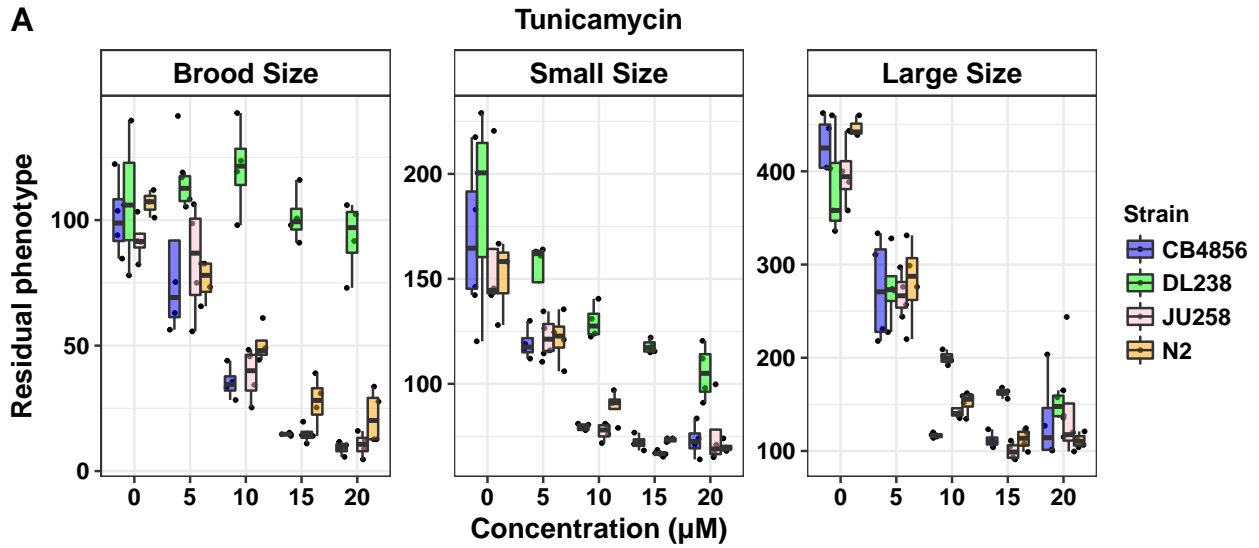

**B**

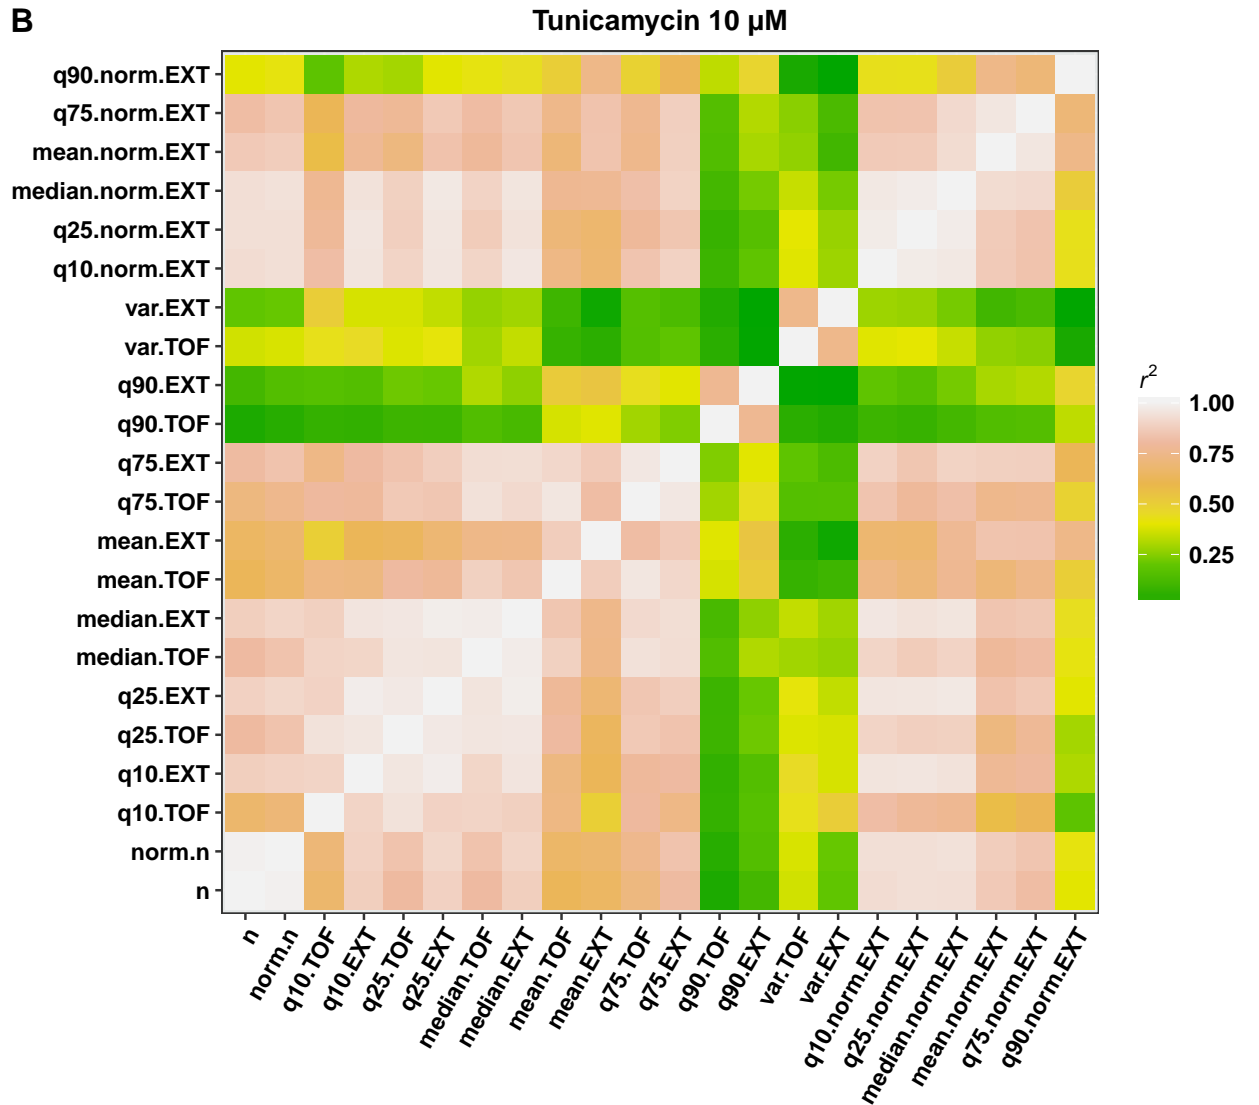

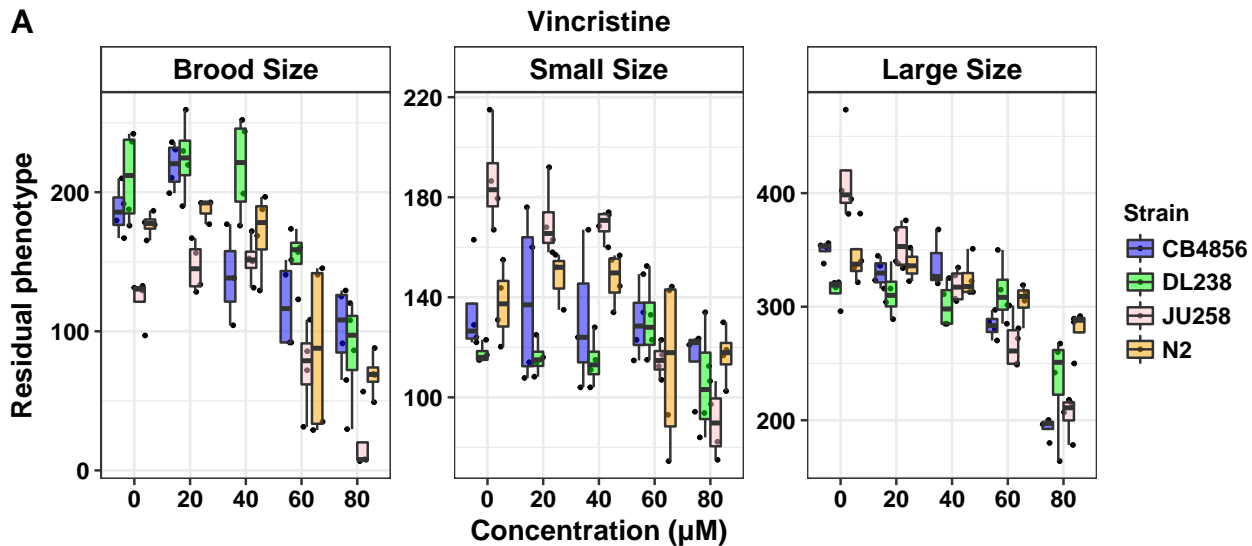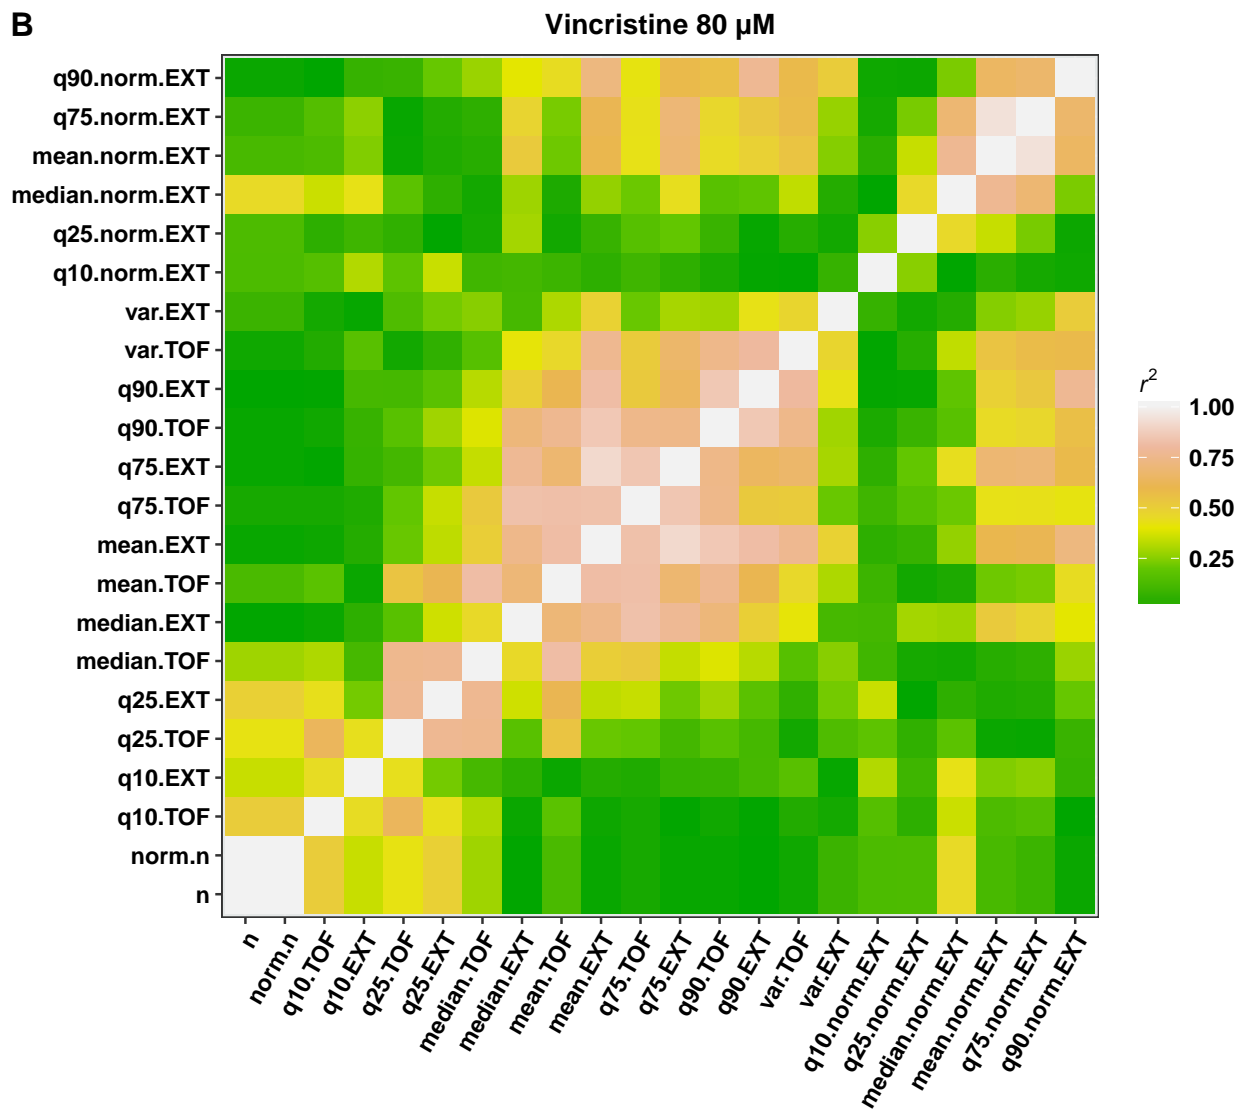



**Figure S1** Dose-response and trait correlation estimates. **(A)** Phenotypic values for four divergent strains, CB4856 (blue), DL238 (green), JU258 (pink), and N2 (orange), in response to various concentrations of each toxin are plotted as Tukey box plots. Toxin responses for traits representing three distinct population parameters (q25.TOF, q75.TOF, and norm.n) are shown. The x-axis indicates either the control (water or DMSO) or the concentration ( $\mu\text{M}$ ) of the toxin, and the y-axis shows the raw phenotypic value for each trait. **(B)** Correlation coefficients ( $r^2$ ) between all pairwise combinations of traits for the indicated concentration of the toxin are plotted as a heat map. Traits are labeled on the x- and y-axes and colors represent correlation coefficients increasing from green to yellow to pink to white.

**A** cadmium.mean.EXT

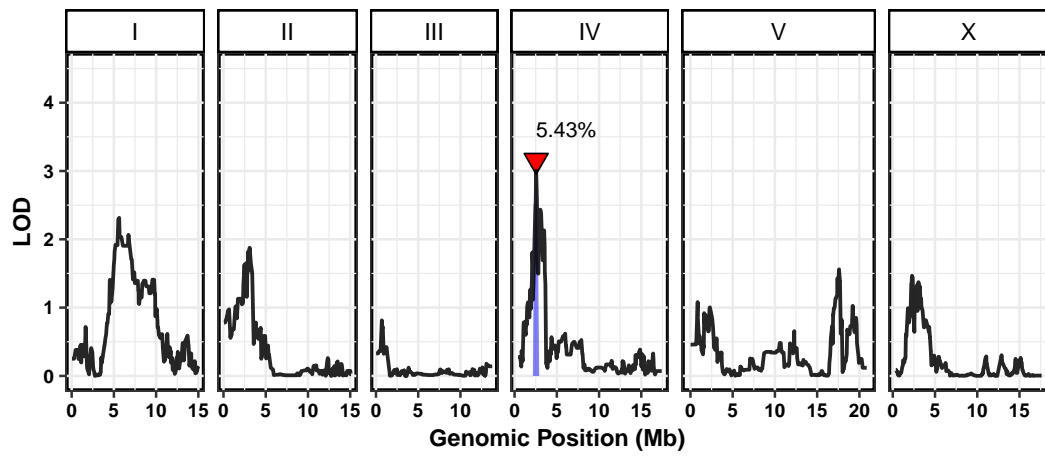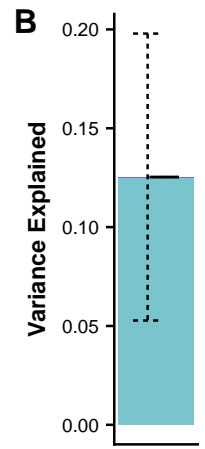

**C**

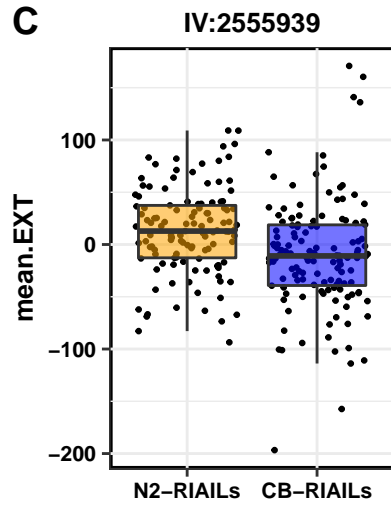

### A cadmium.median.EXT

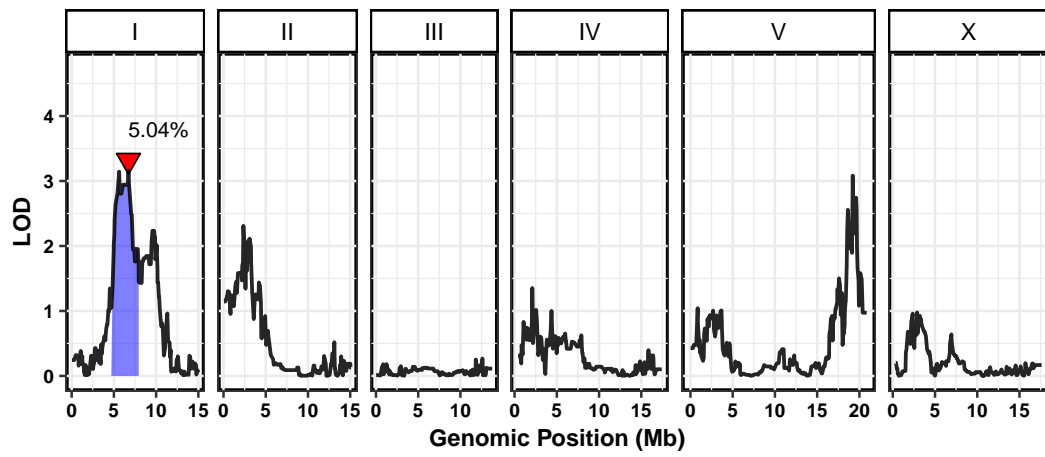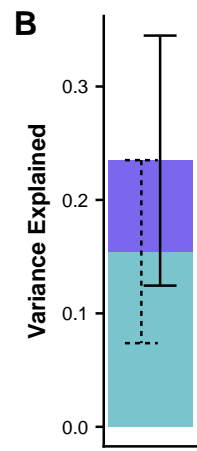

### C I:6724980

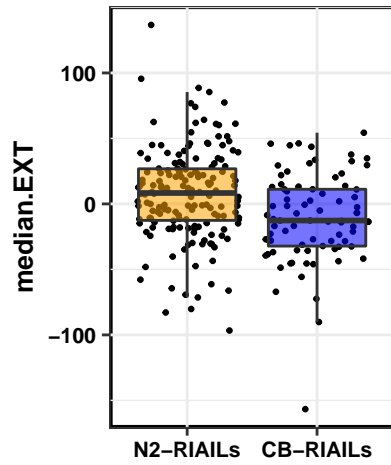

**A cadmium.median.TOF**

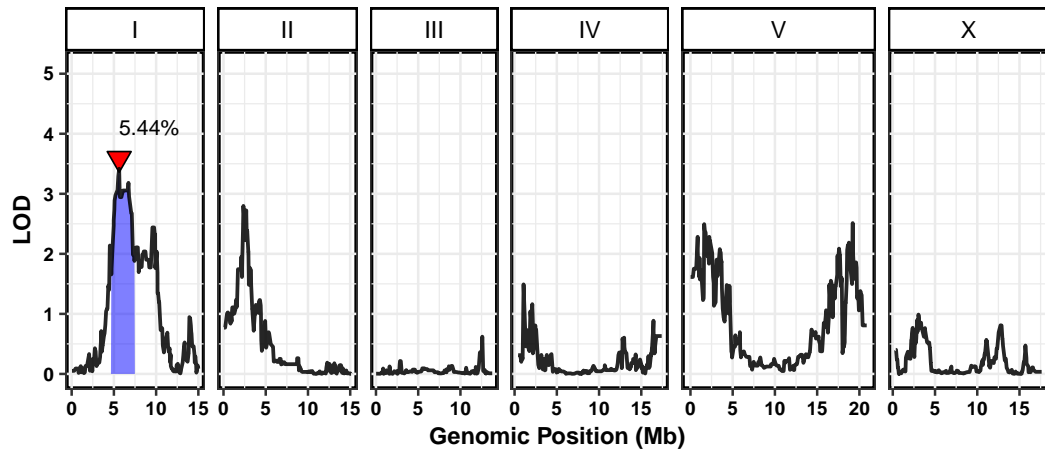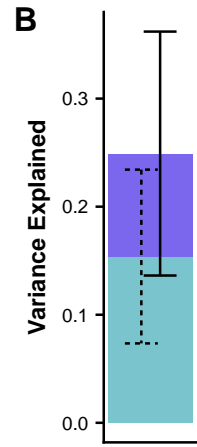

**C**

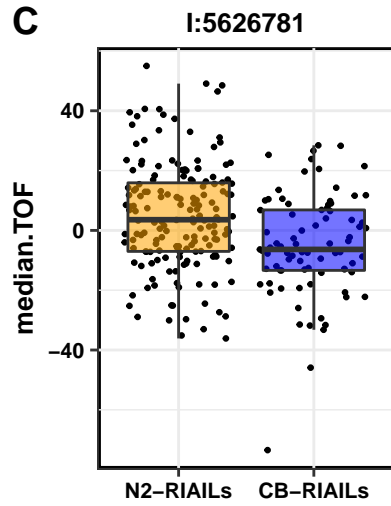

**A** cadmium.n

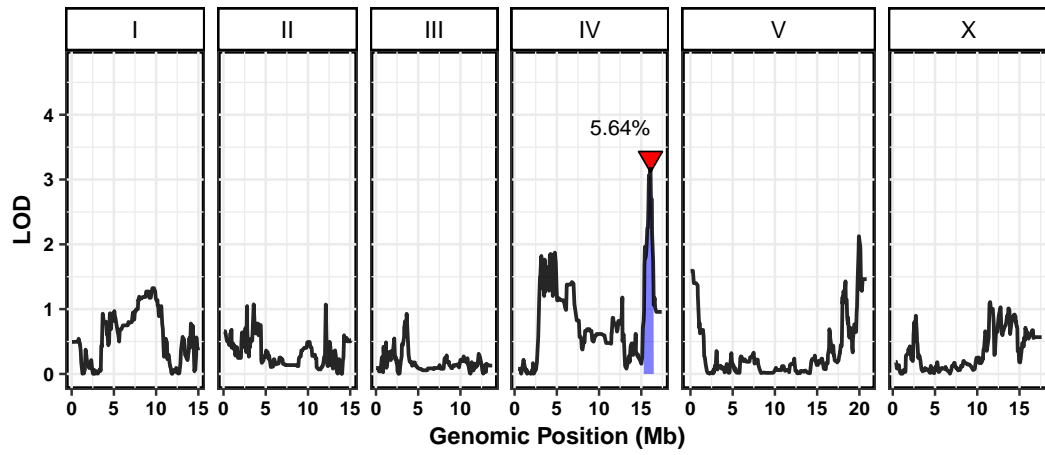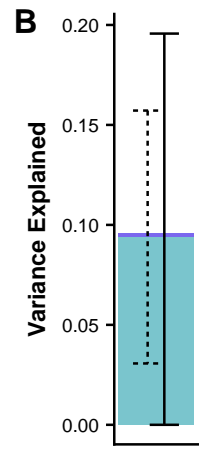

**C** IV:16090703

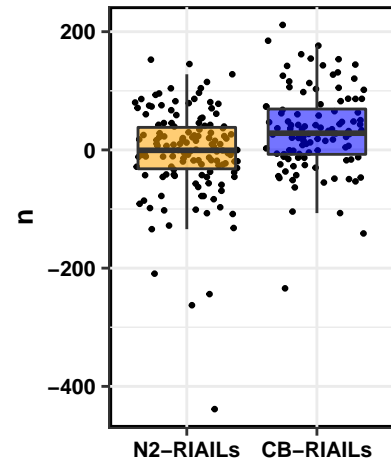

**A** cadmium.q10.TOF

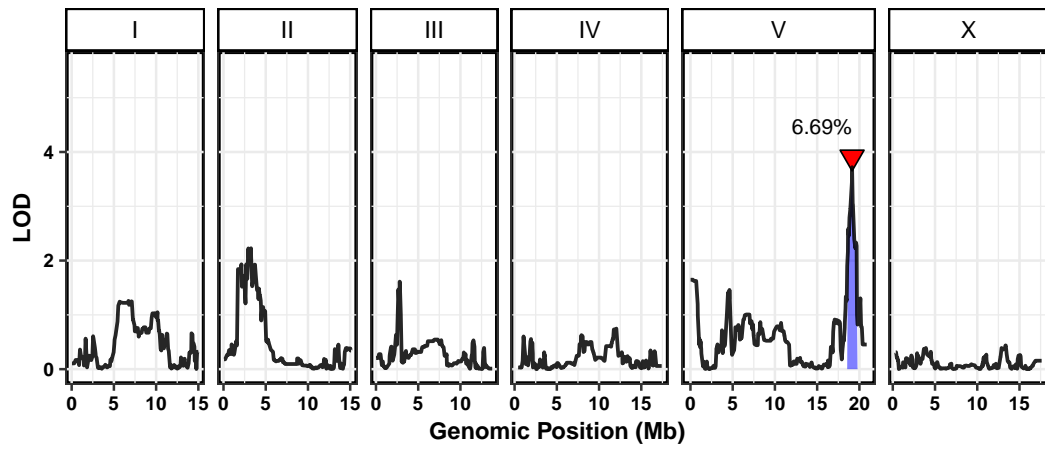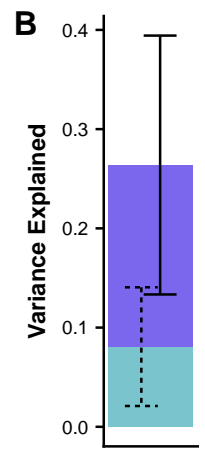

**C** V:19135309

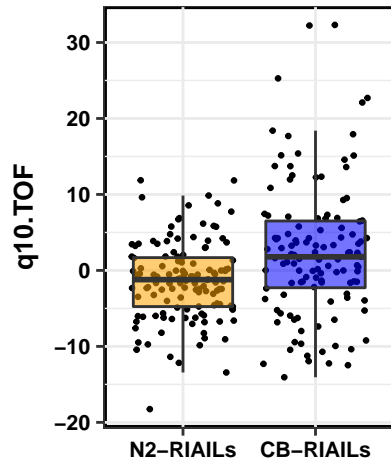

### A cadmium.q25.EXT

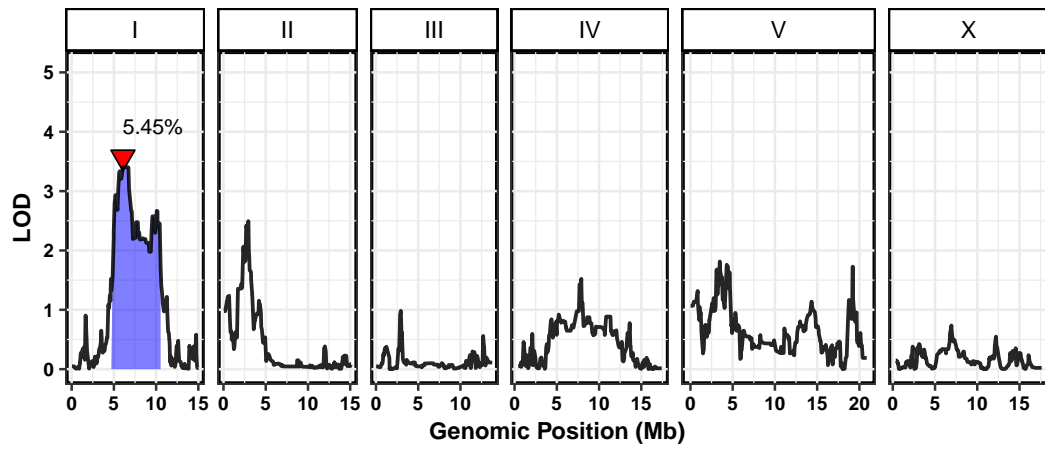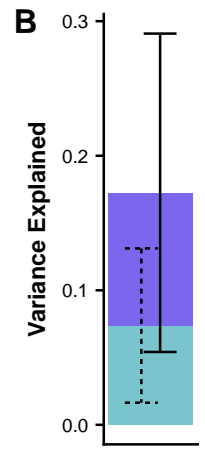

### C I:6070814

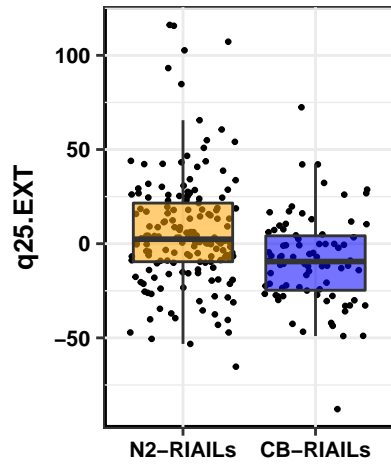

### A cadmium.q25.norm.EXT

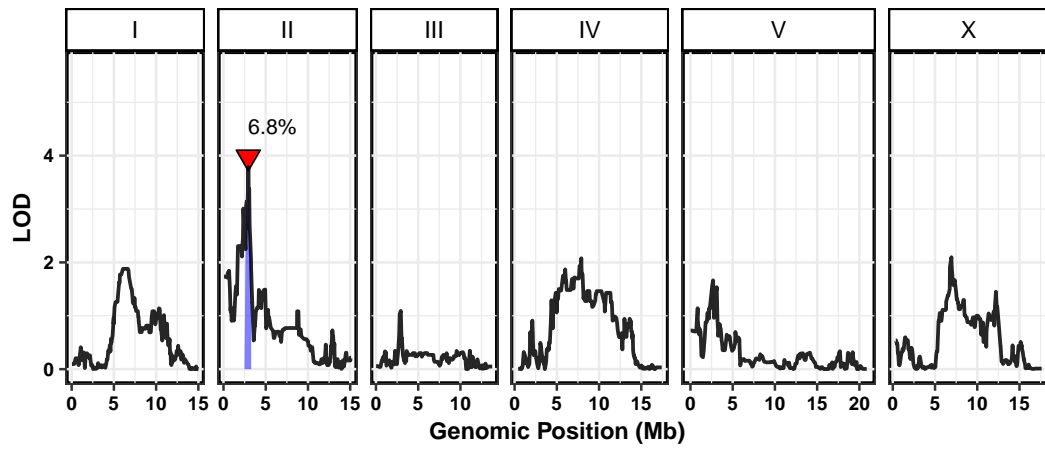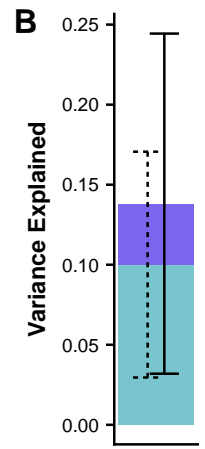

### C

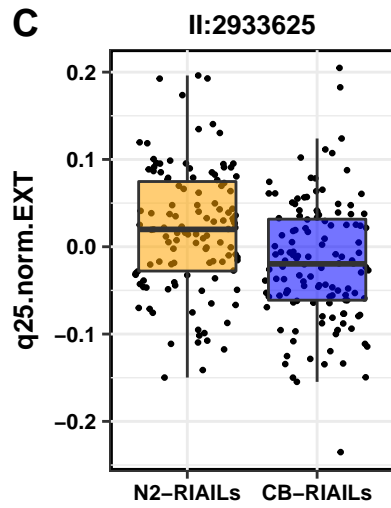



### A cadmium.q75.norm.EXT

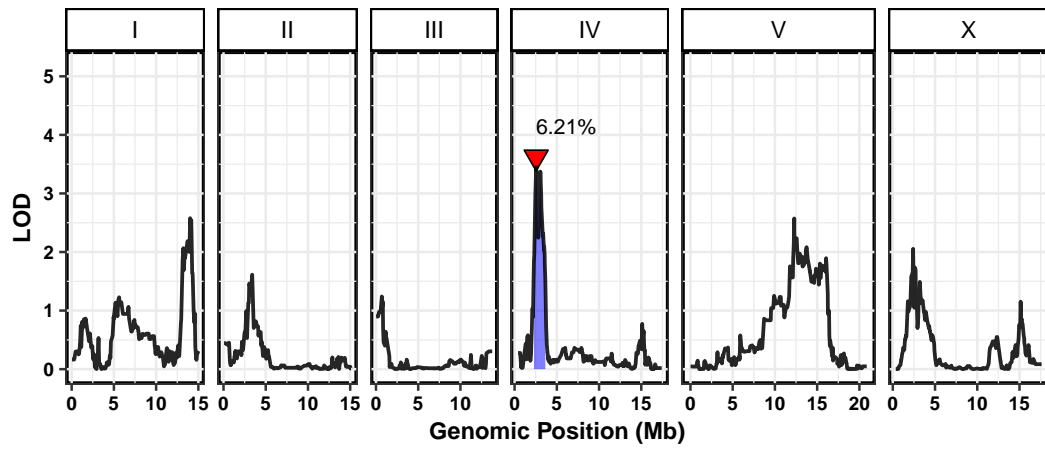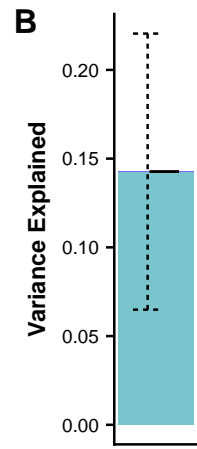

### C

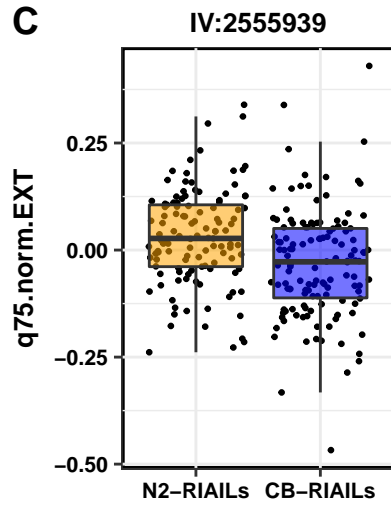

**A** cadmium.q75.TOF

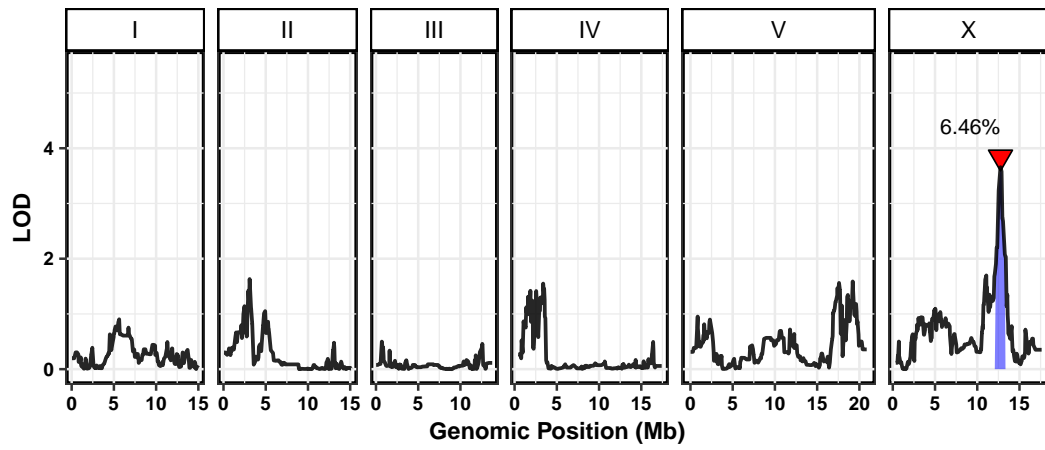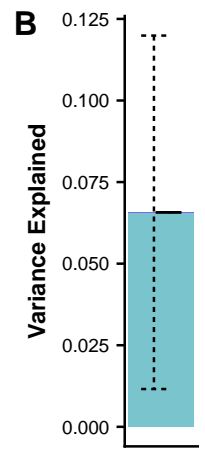

**C**

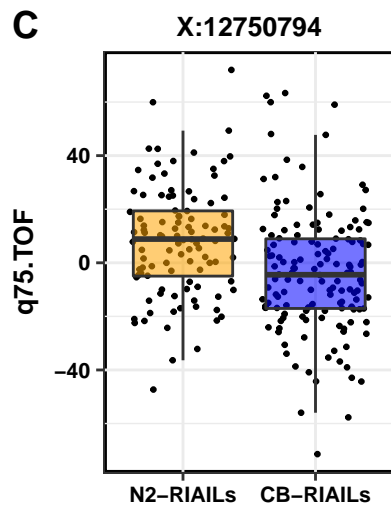

### A cadmium.q90.EXT

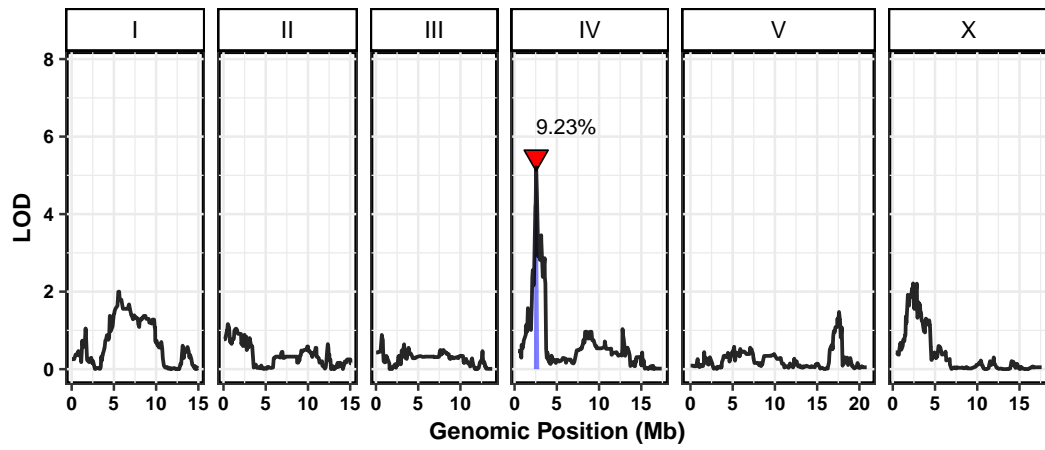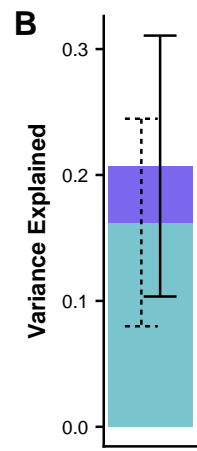

### C IV:2555939

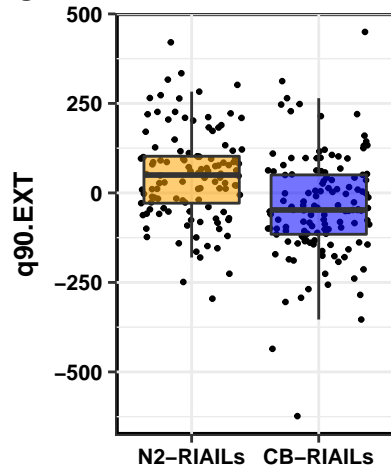

### A cadmium.q90.norm.EXT

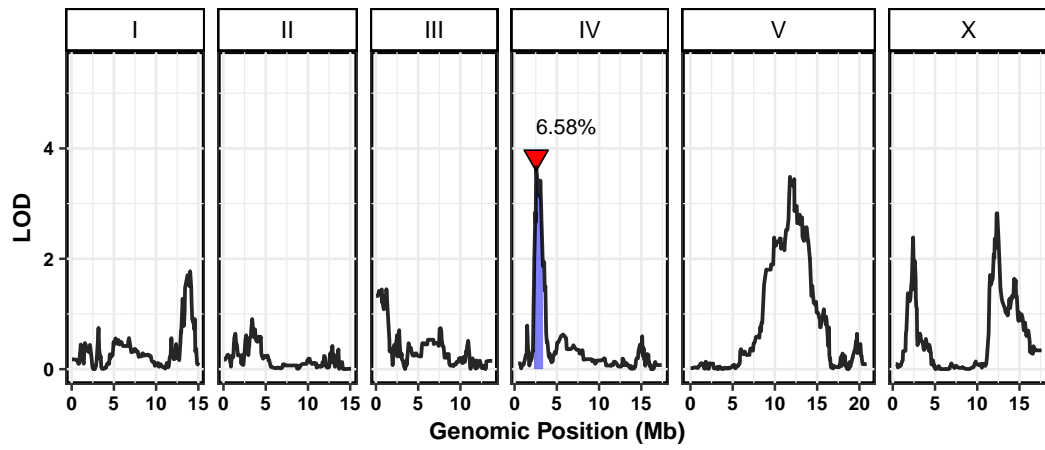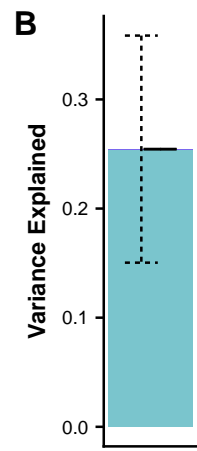

### C IV:2555939

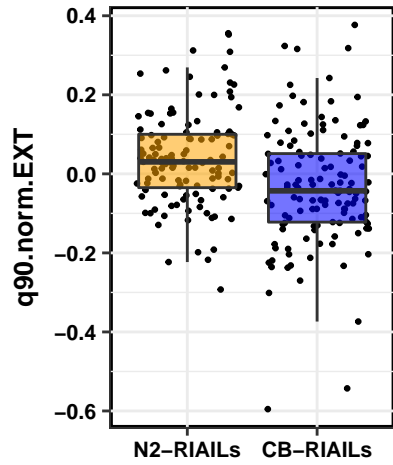

**A** cadmium.q90.TOF

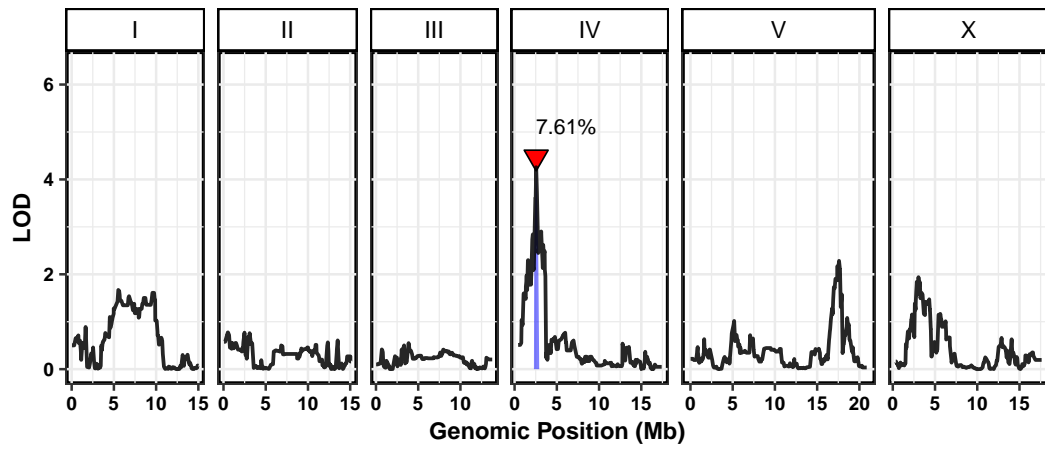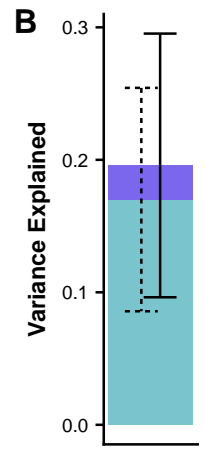

**C**

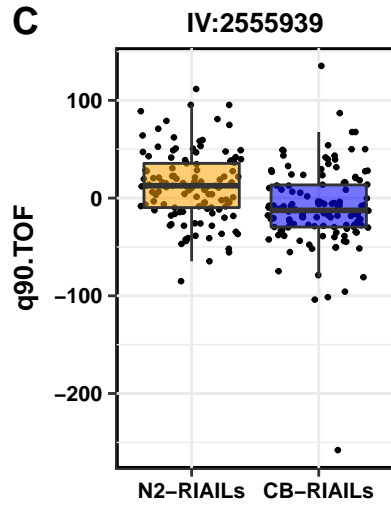

### A cadmium.var.EXT

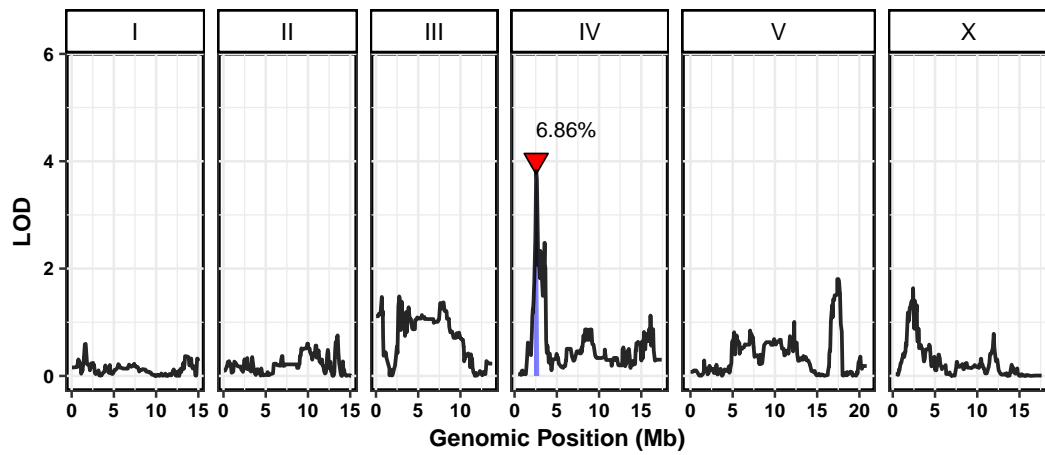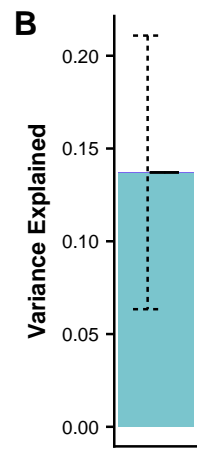

### C IV:2555939

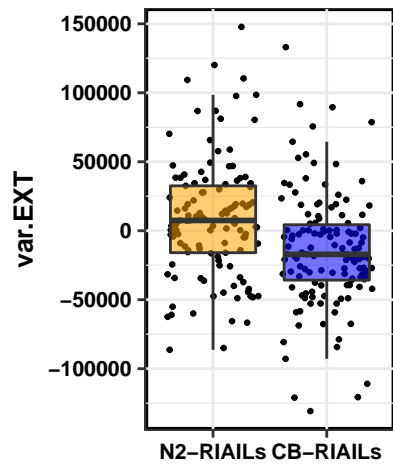

### A cadmium.var.TOF

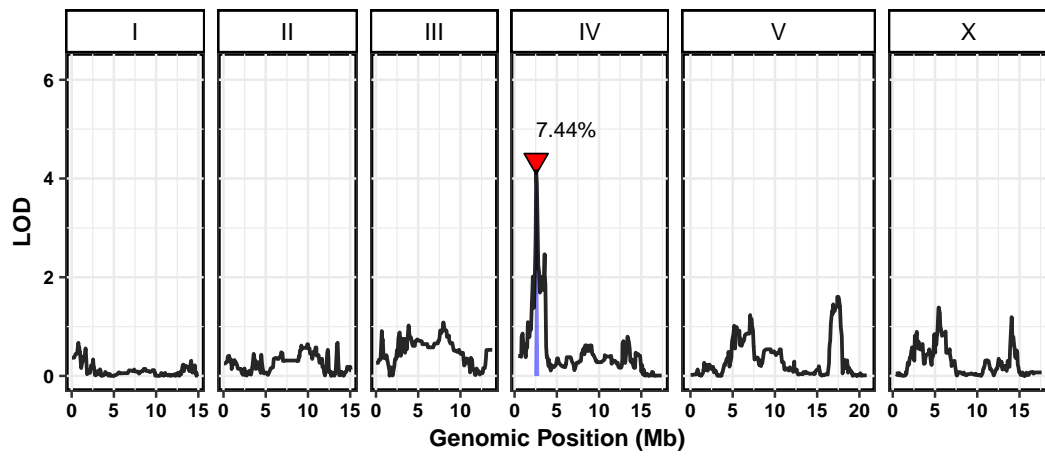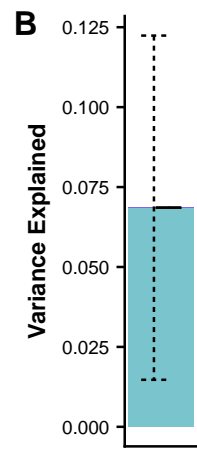

### C

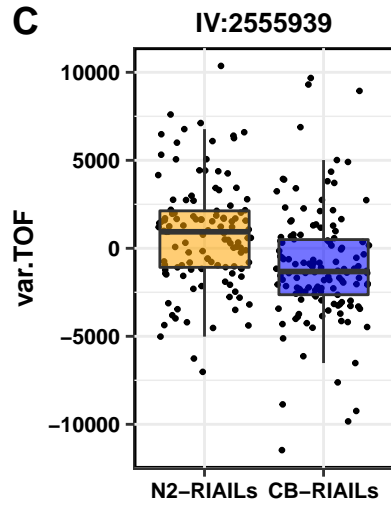

### A *carmustine.cv.EXT*

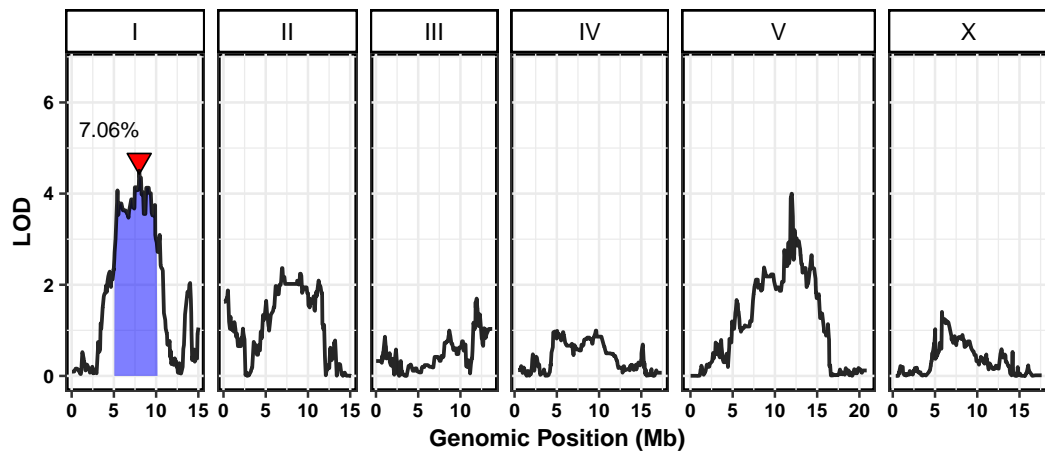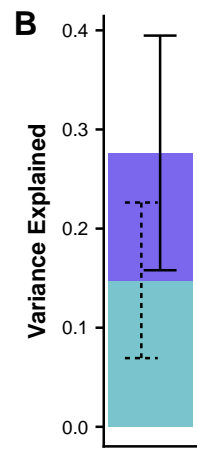

### C I:7997352

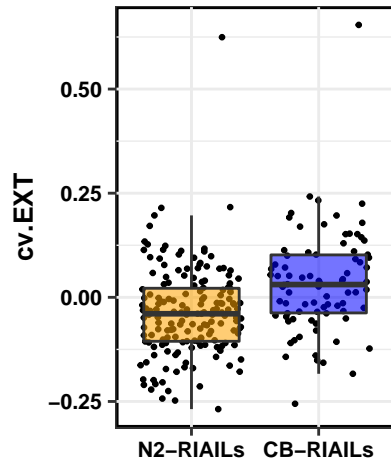



**A** carmustine.cv.TOF

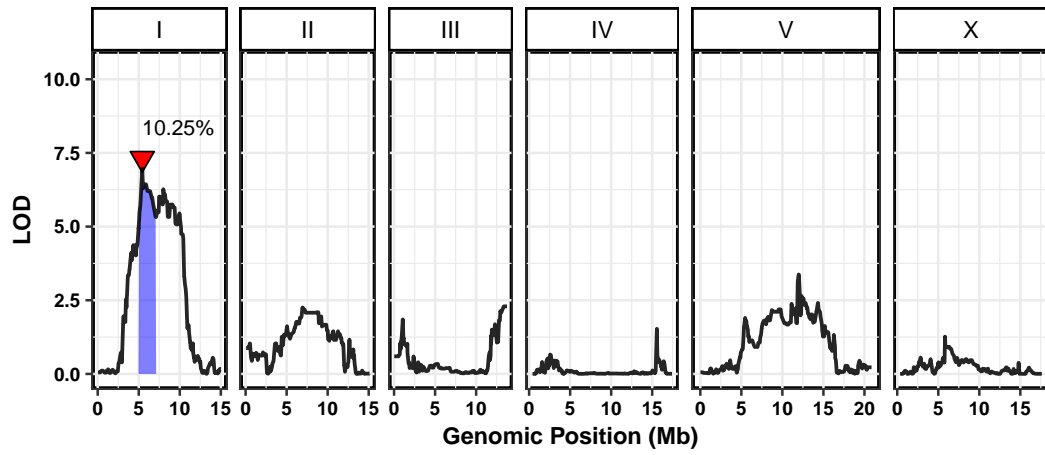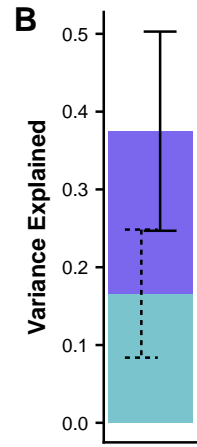

**C** I:5428703

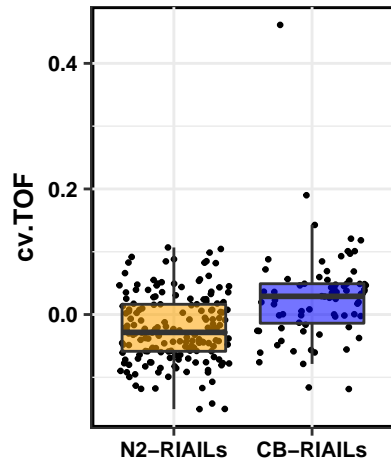

### A carmustine.mean.EXT

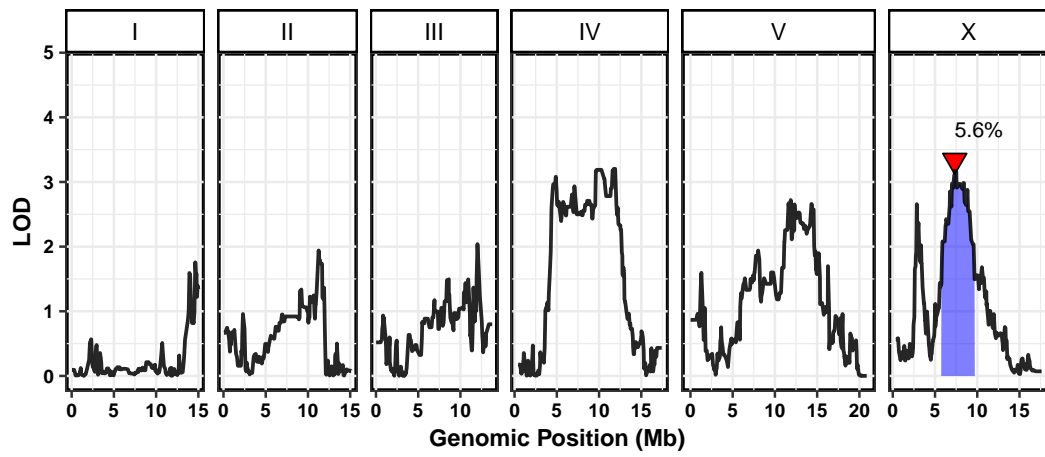

### B

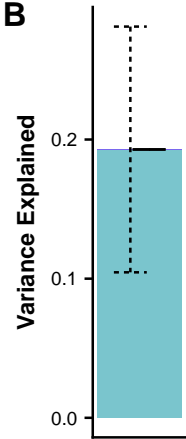

### C

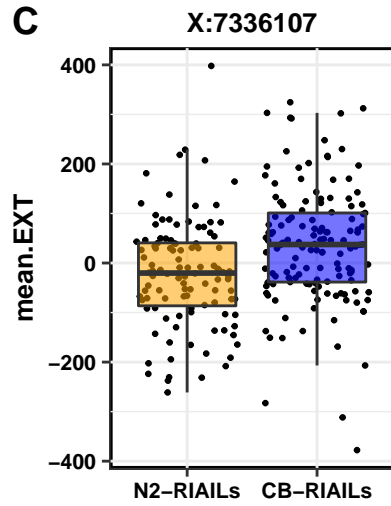

**A** *car*mustine.mean.TOF

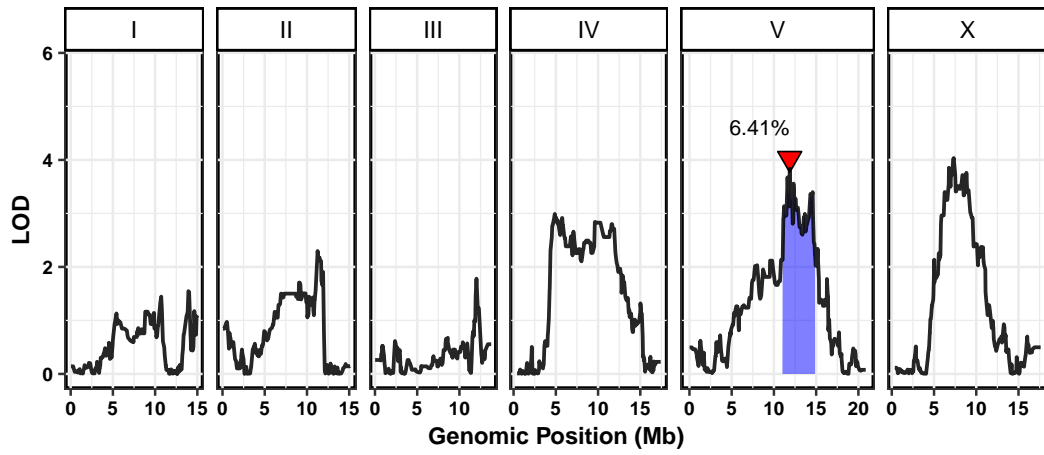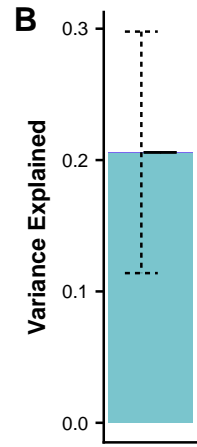

**C**

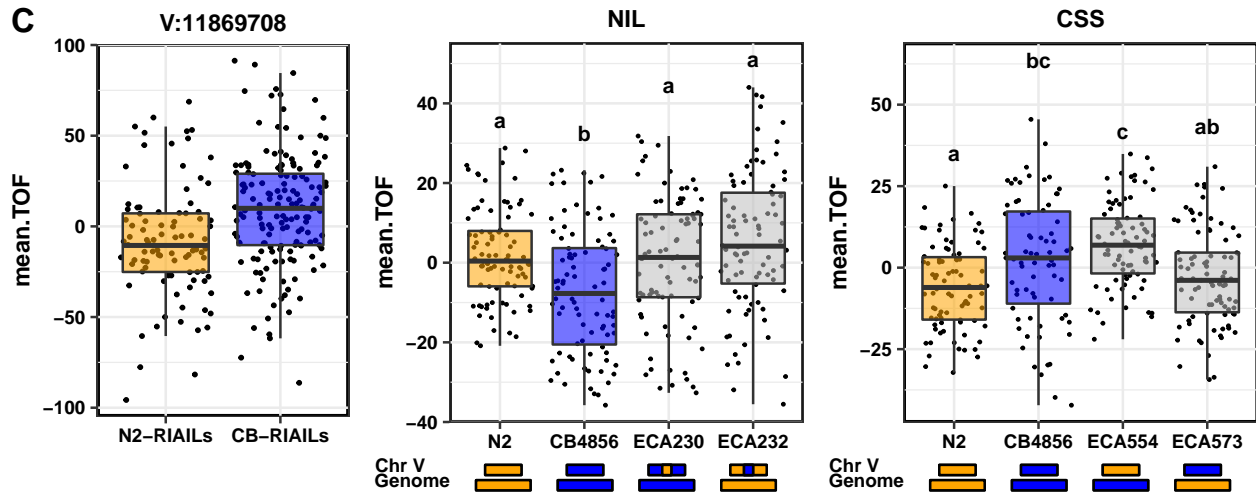

### A carmustine.median.norm.EXT

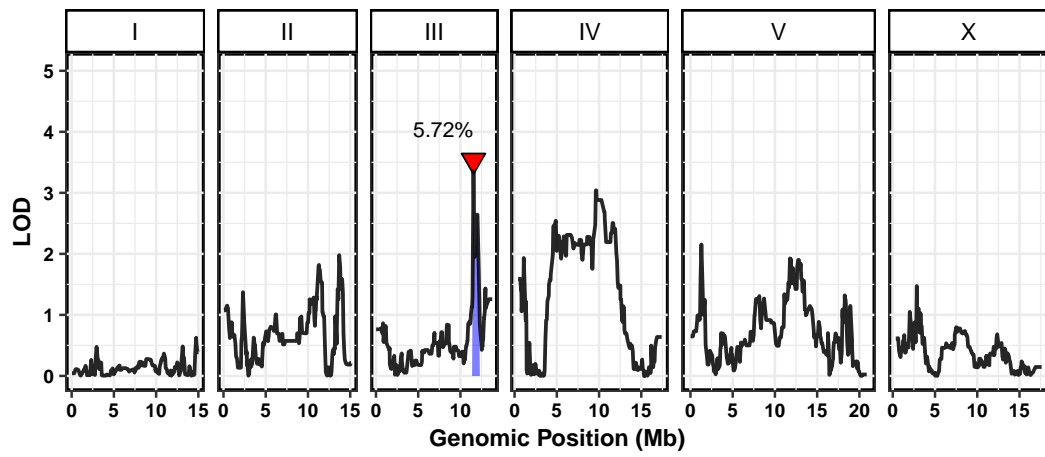

### B

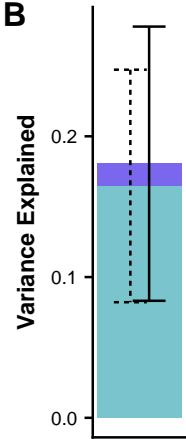

### C

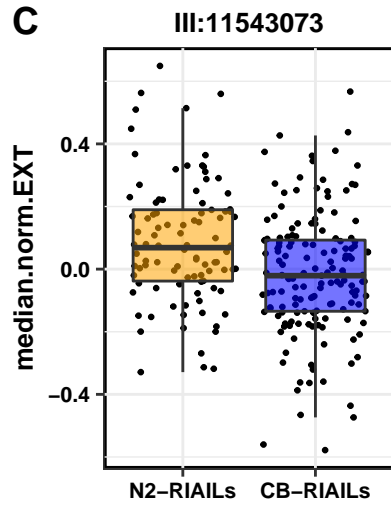

**A** **carmustine.n**

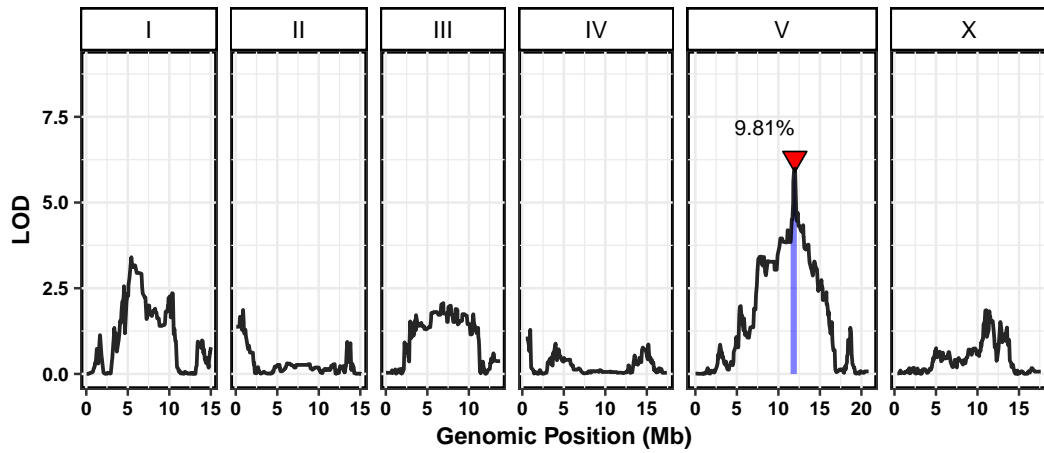

**B**

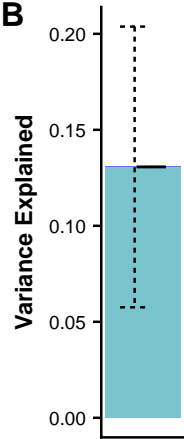

**C**

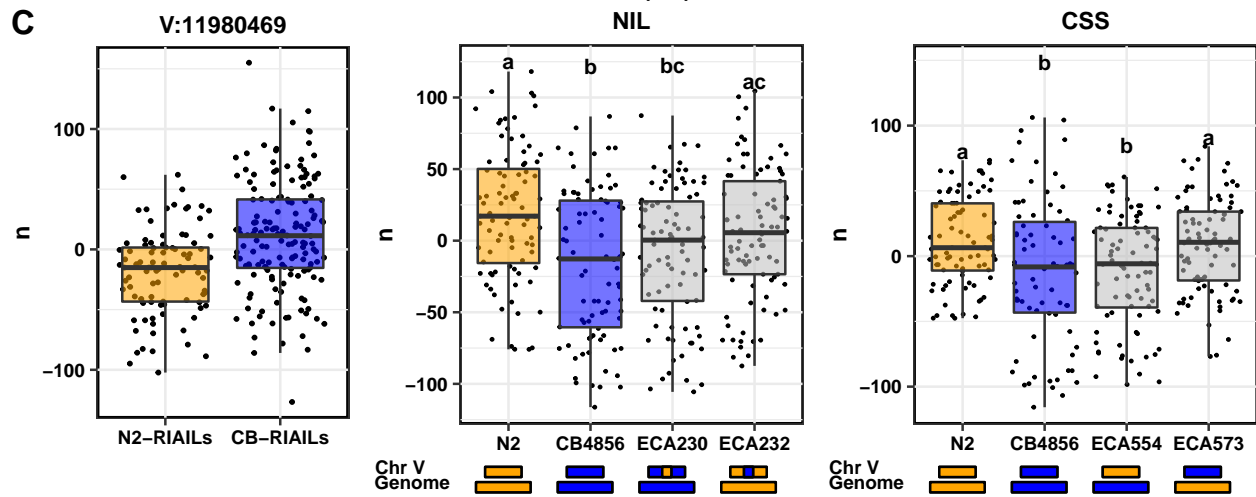

**A** carmustine.norm.n

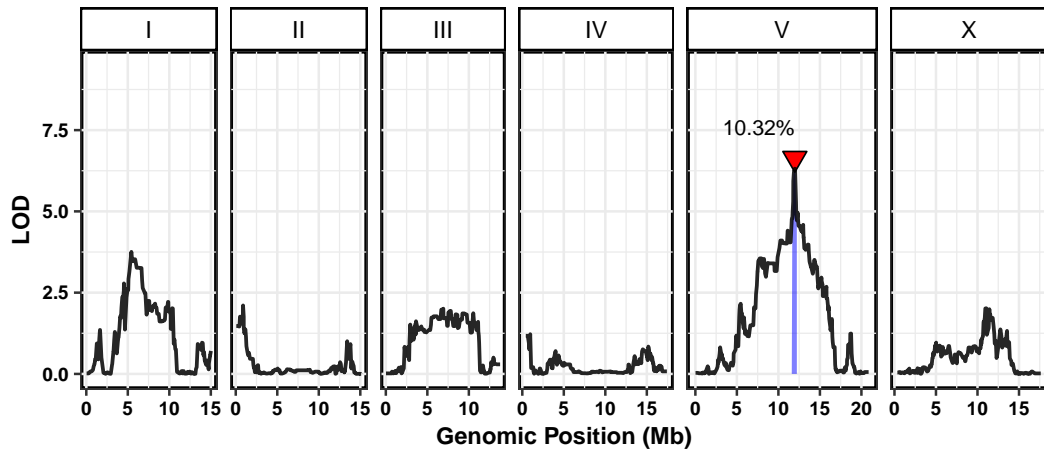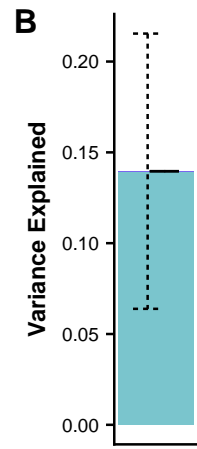

**C**

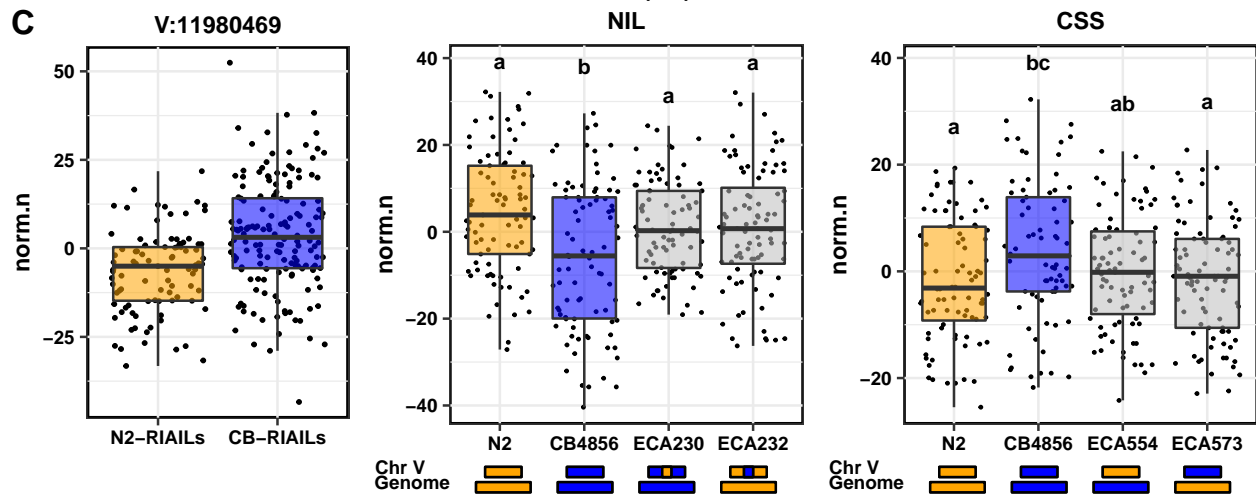

**A** carmustine.q10.norm.EXT

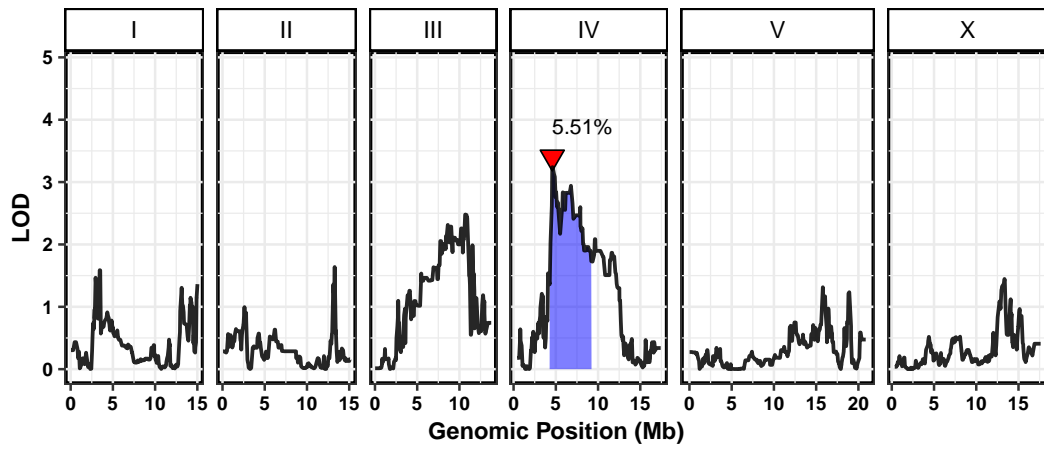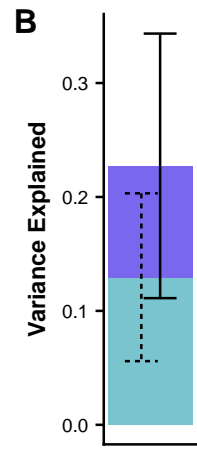

**C**

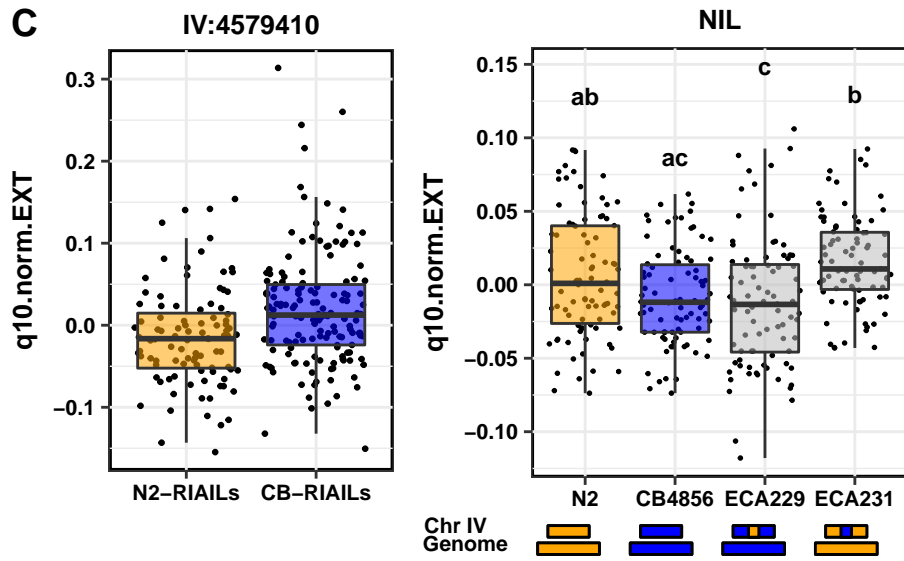

### A carmustine.q10.TOF

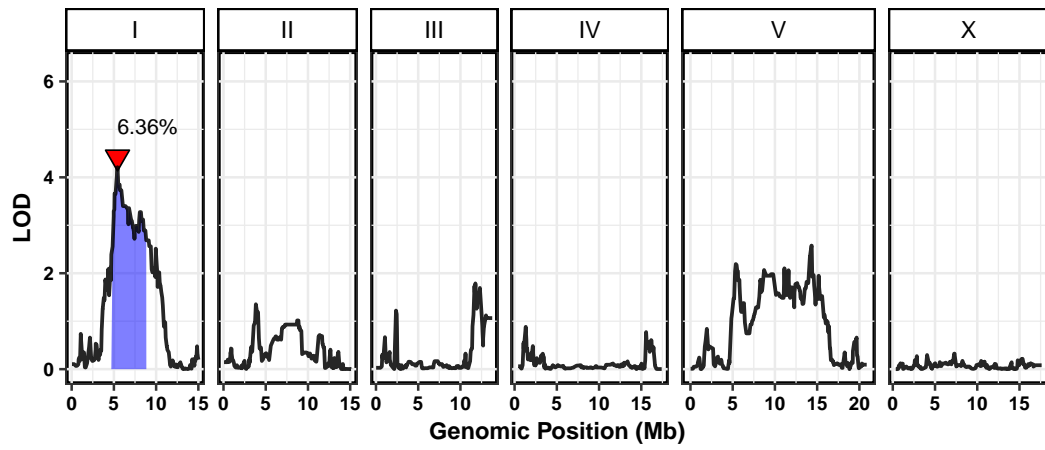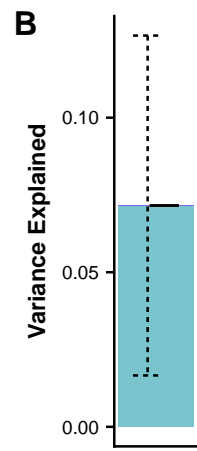

### C I:5428703

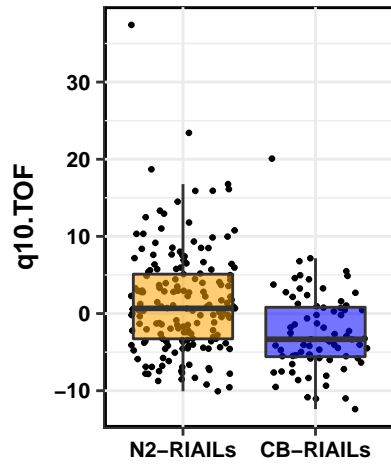



### A carmustine.q25.EXT

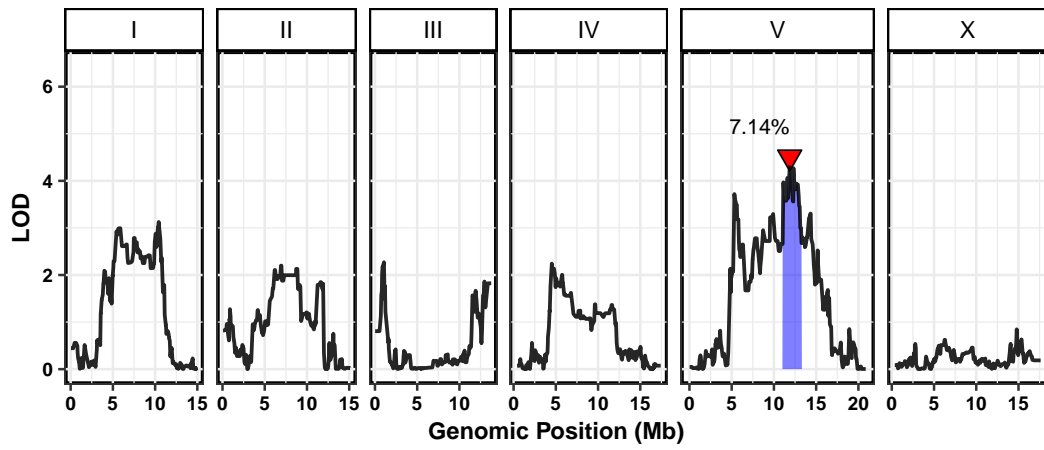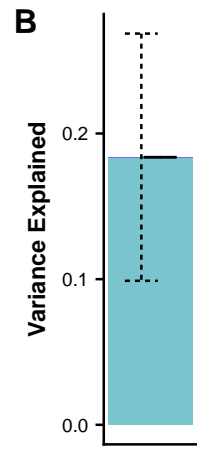

### C

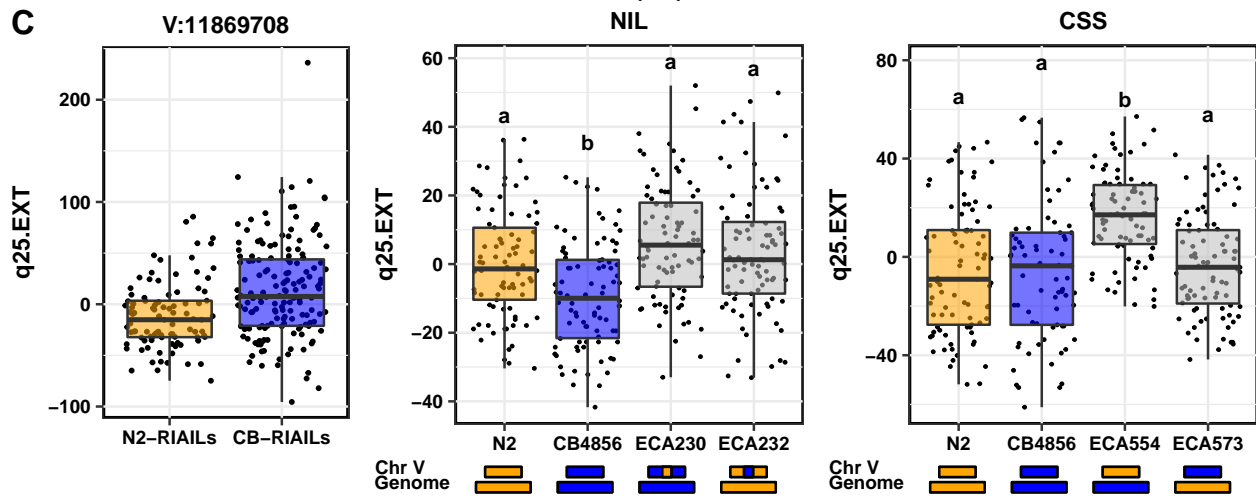

**A** carmustine.q25.norm.EXT

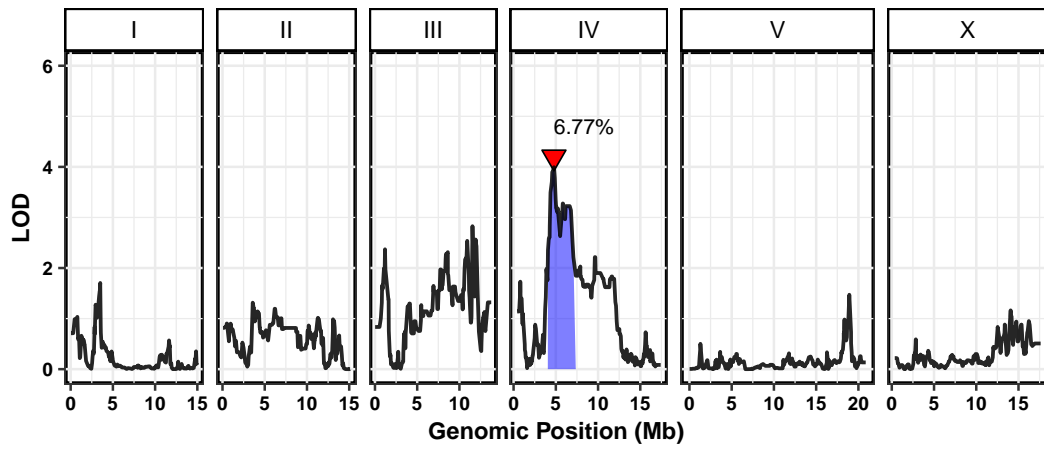

**B**

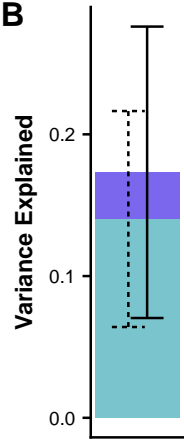

**C**

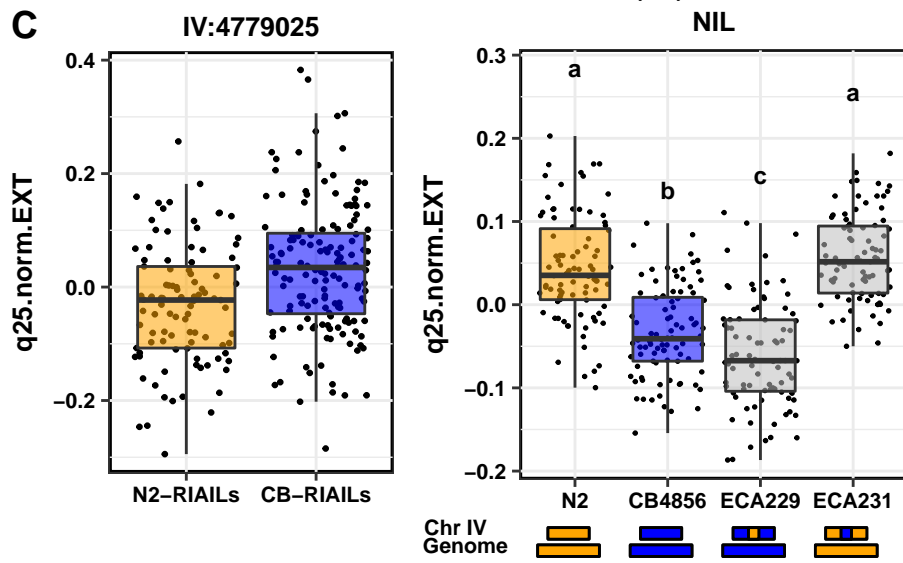

**A** carmustine.q25.TOF

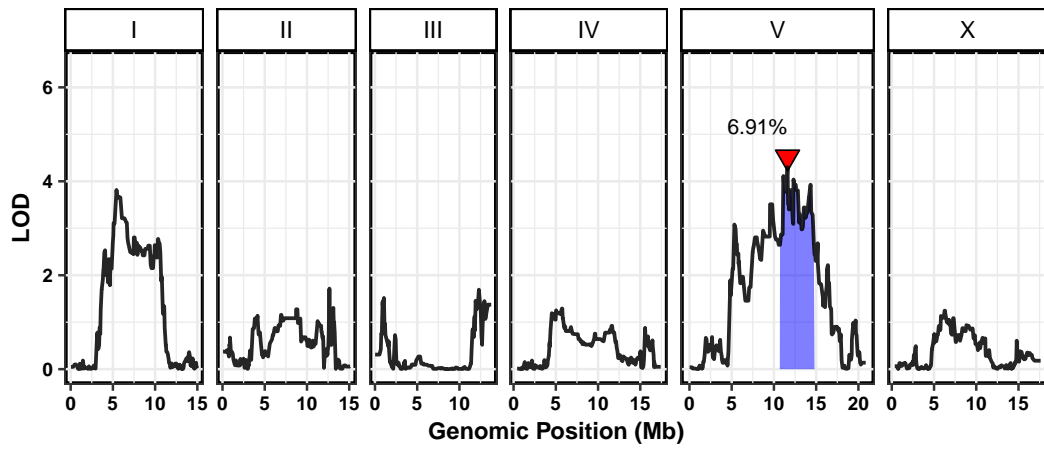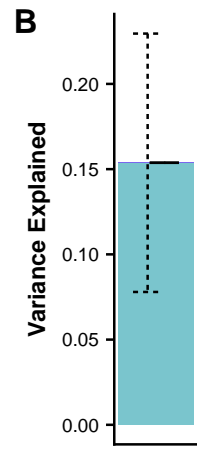

**C**

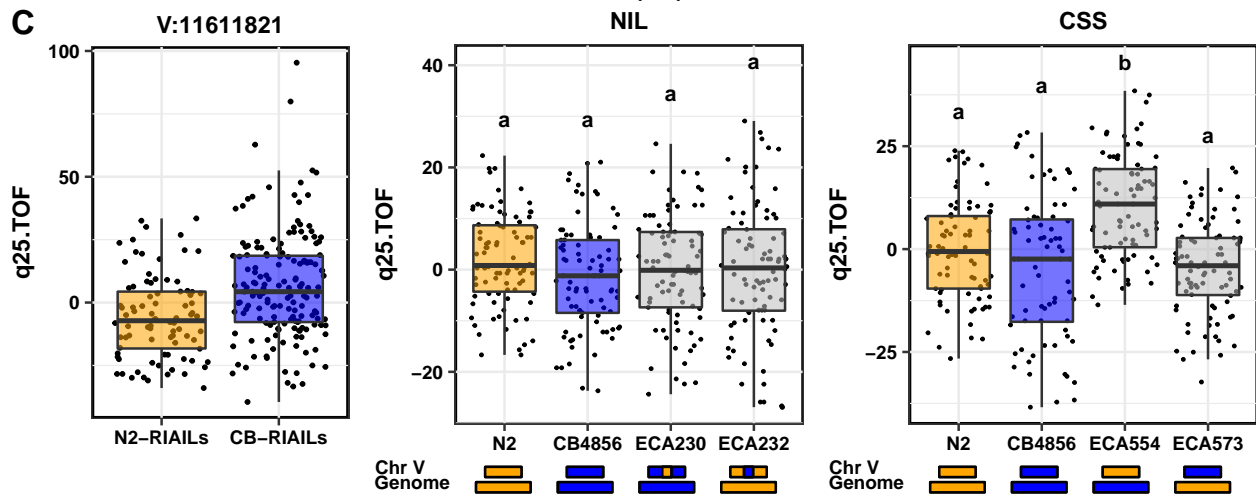

### A carmustine.q75.EXT

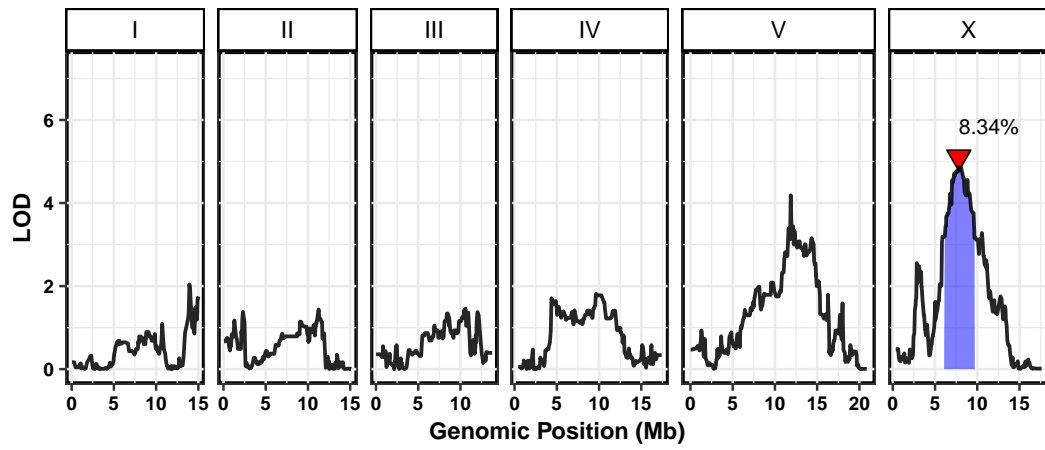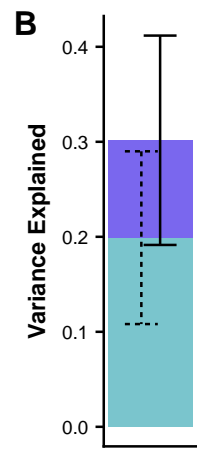

### C

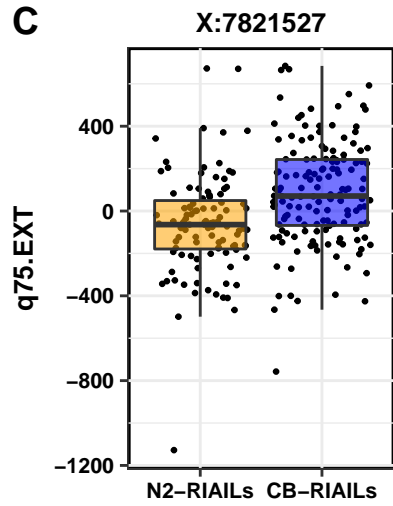

**A** carmustine.q75.norm.EXT

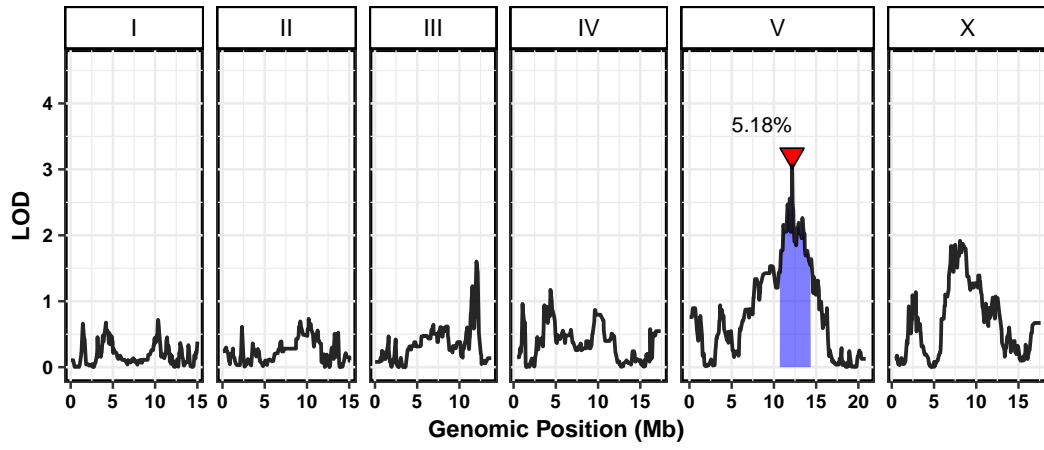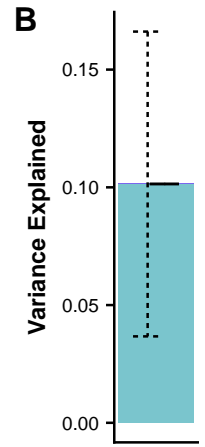

**C**

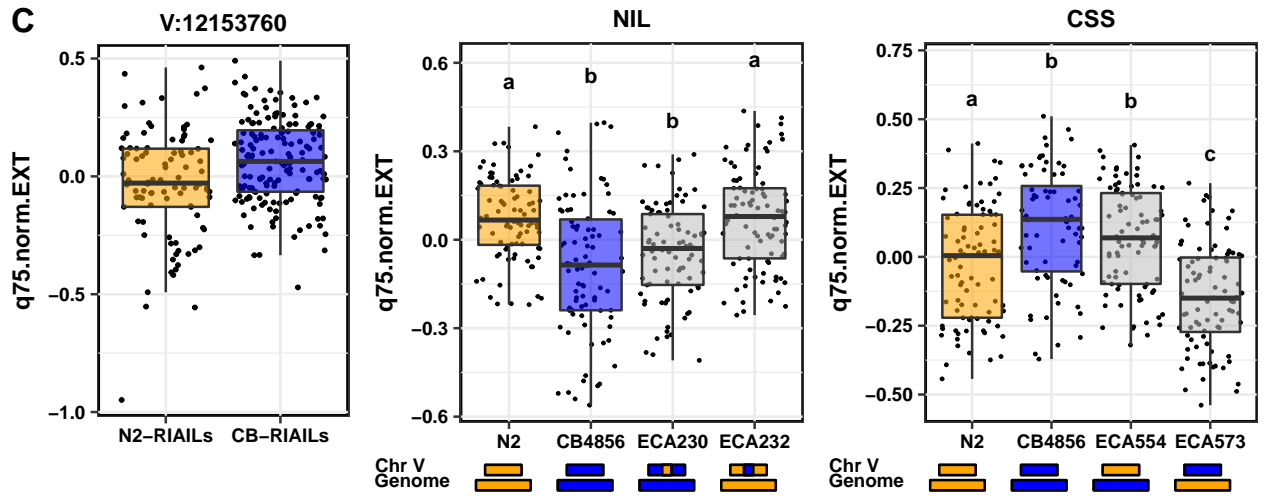

**A** carmustine.q75.TOF

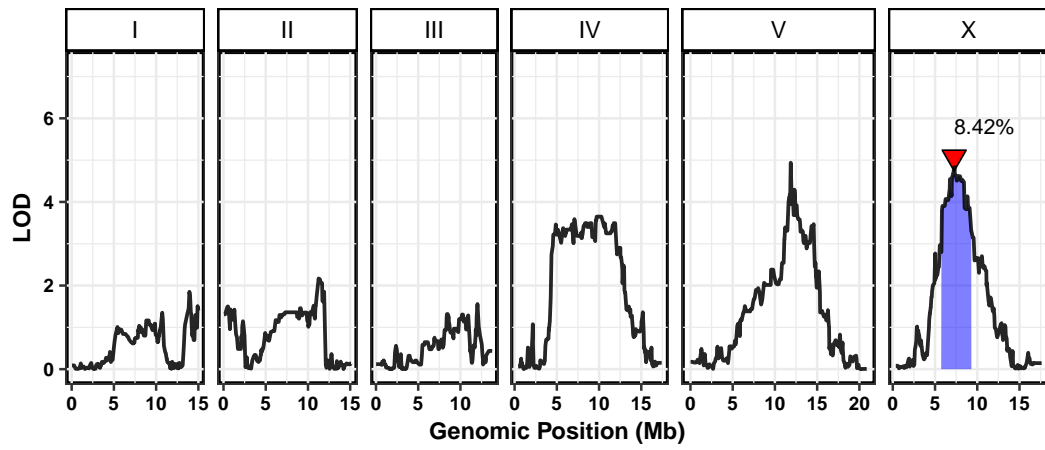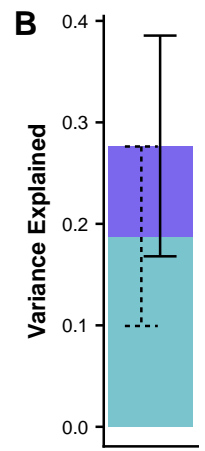

**C**

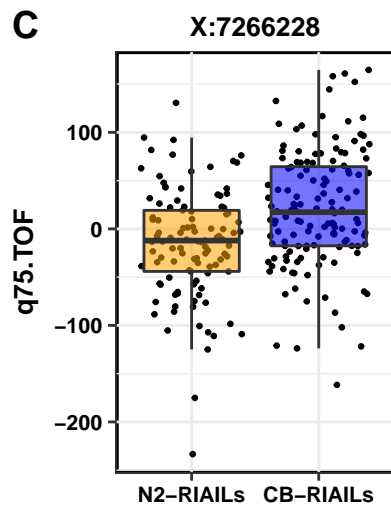

### A carmustine.q90.EXT

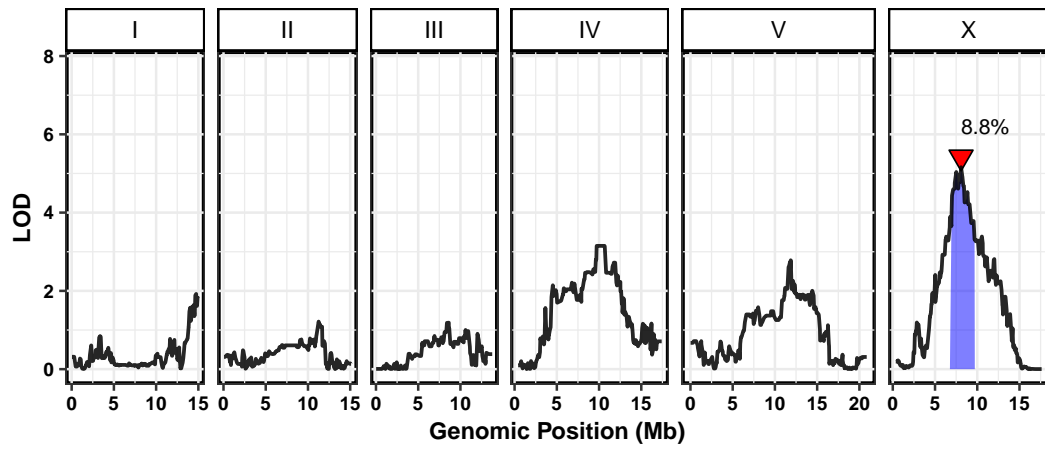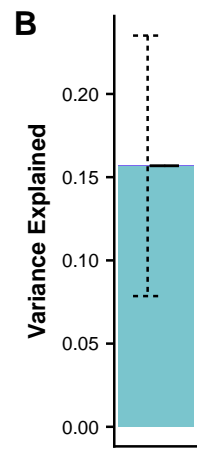

### C X:8083582

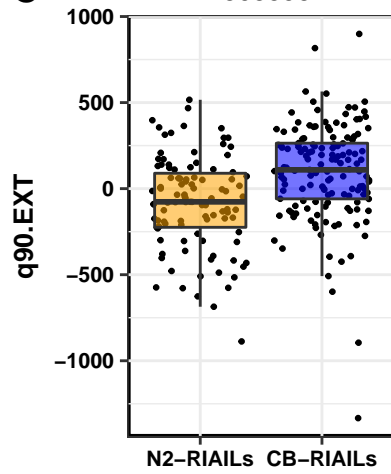

### A carmustine.q90.TOF

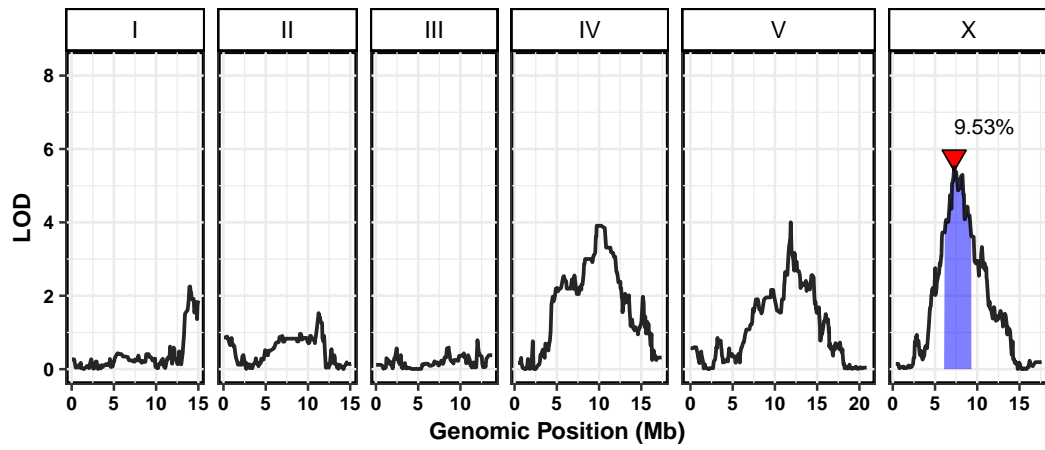

### B

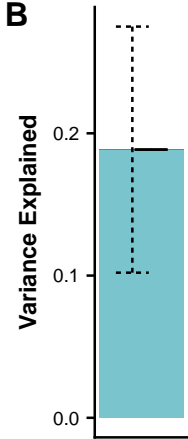

### C

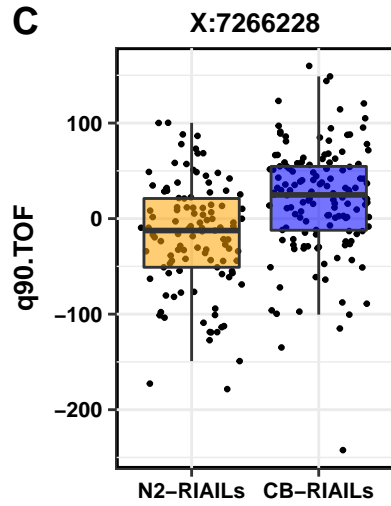



**A** *carmustine.var.TOF*

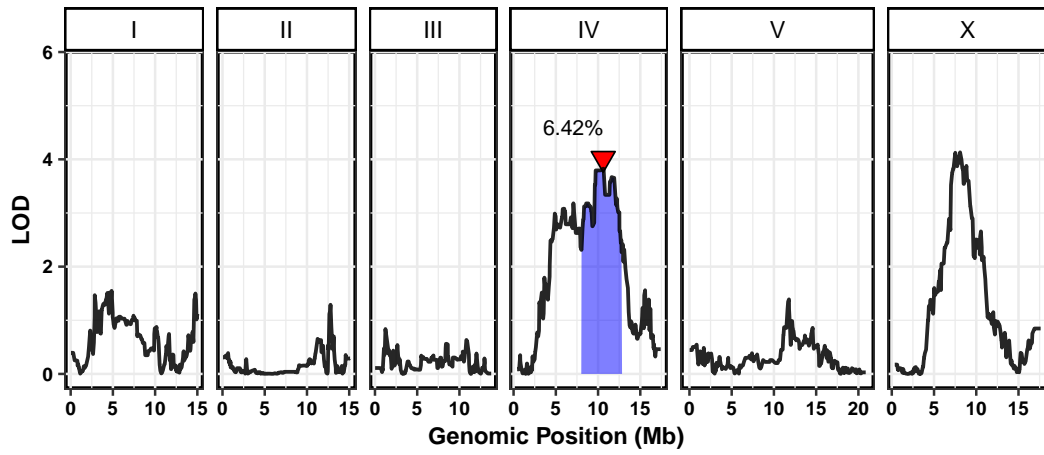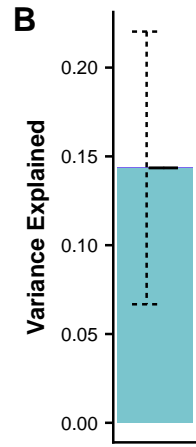

**C**

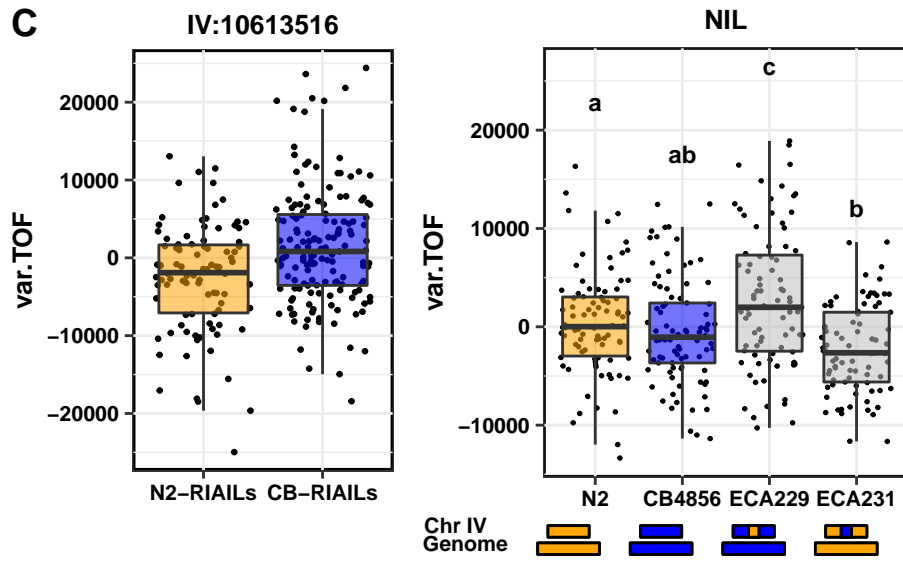

### A chlorothalonil.cv.EXT

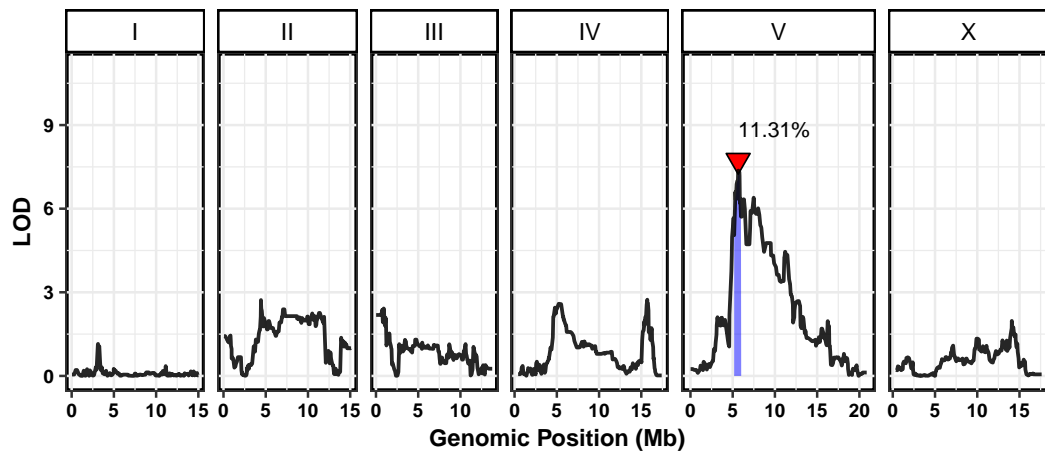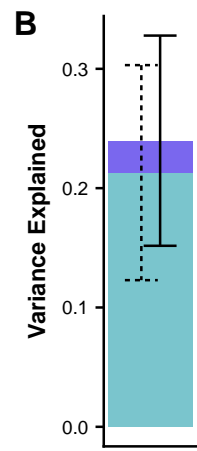

### C V:5648293

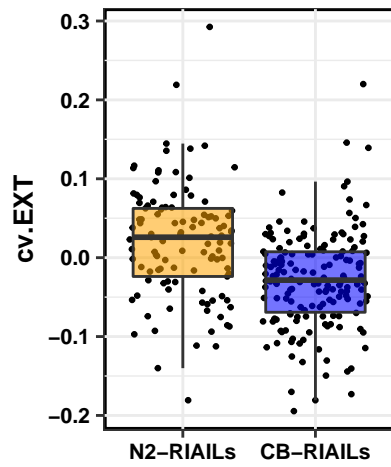

**A chlorothalonil.cv.TOF**

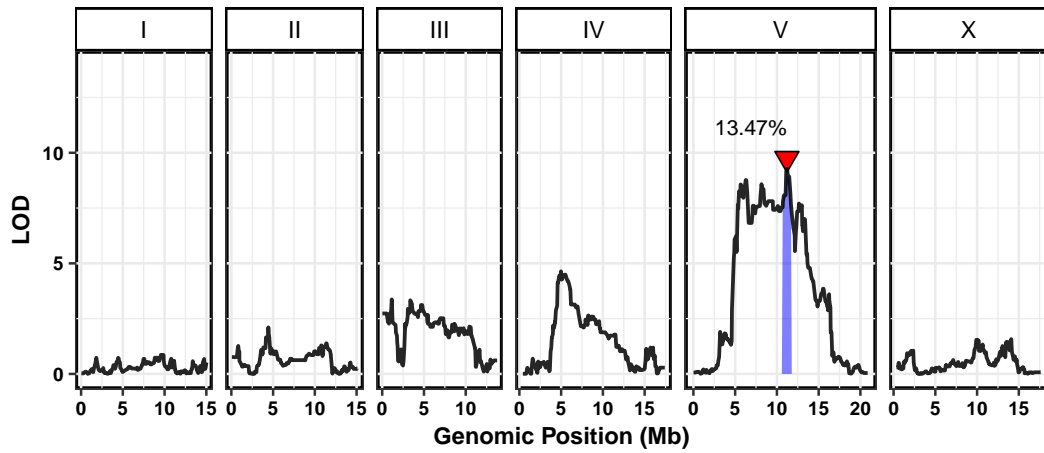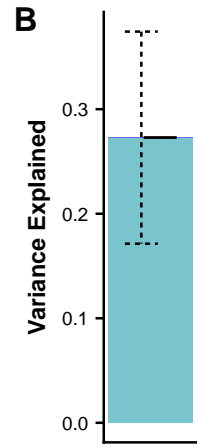

**C**

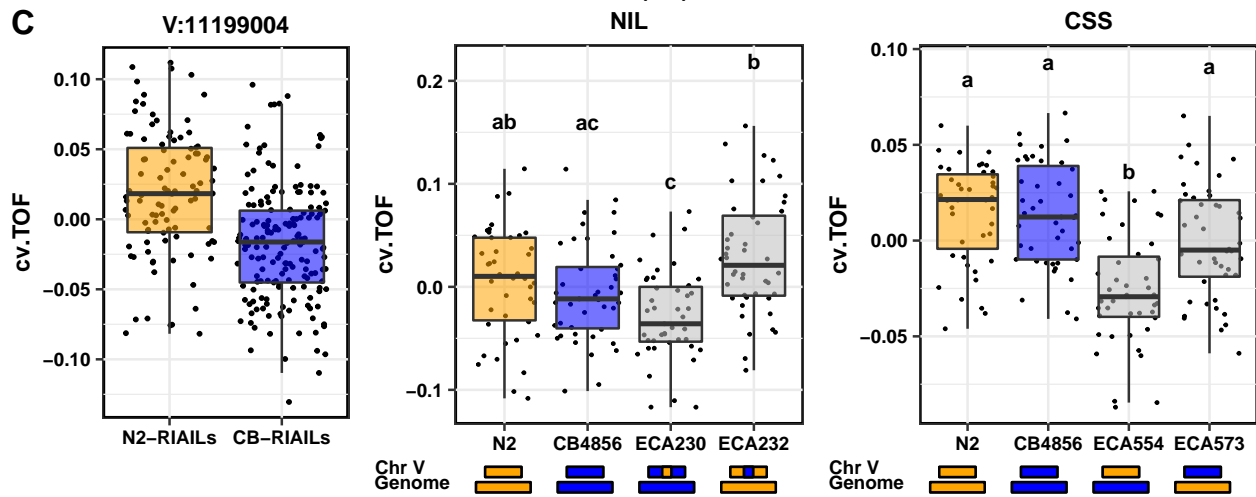

**A chlorothalonil.mean.EXT**

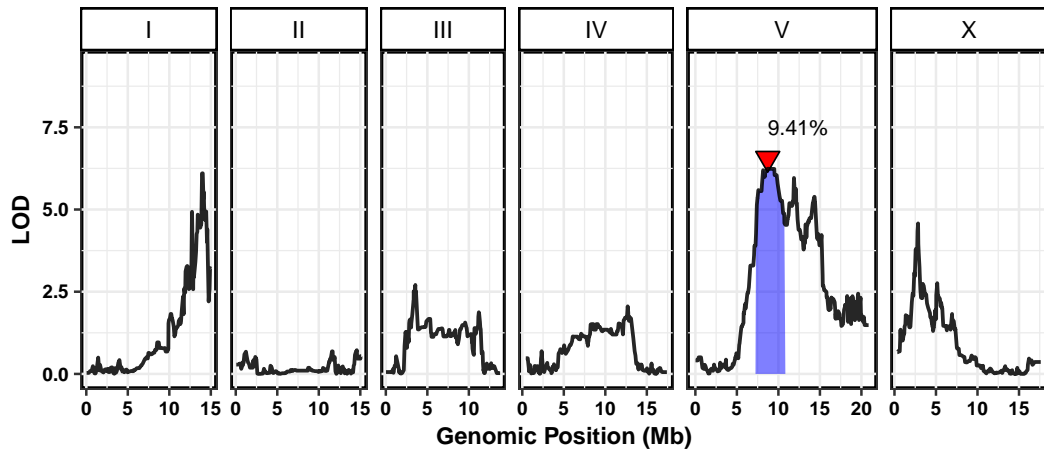

**B**

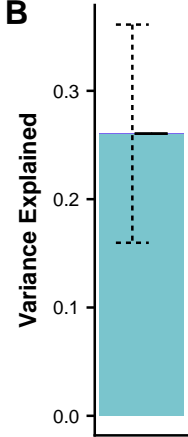

**C**

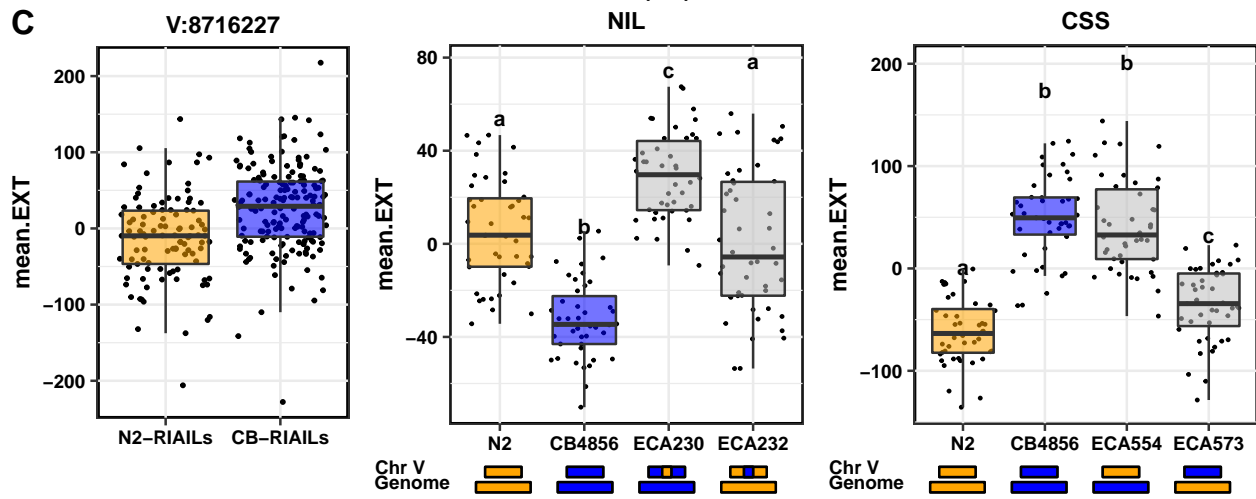

### A chlorothalonil.mean.norm.EXT

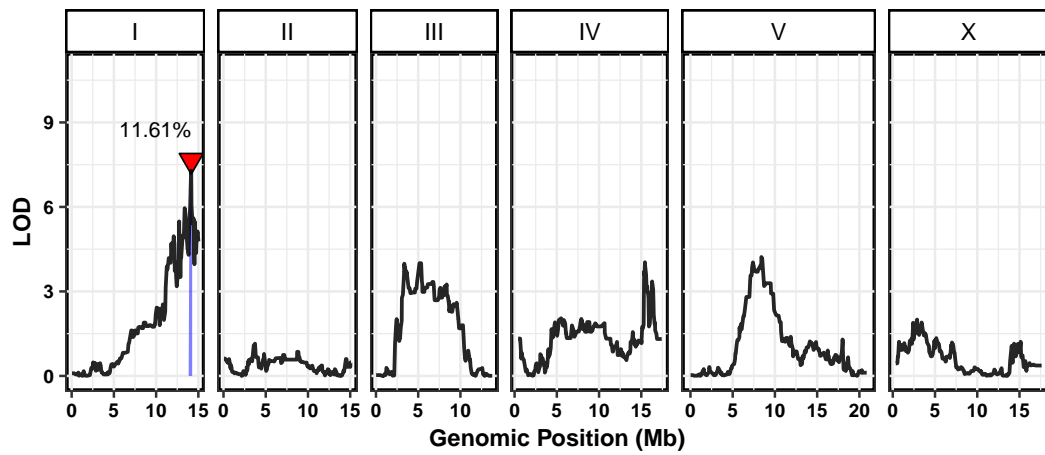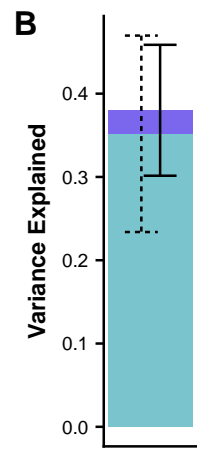

### C I:14155589

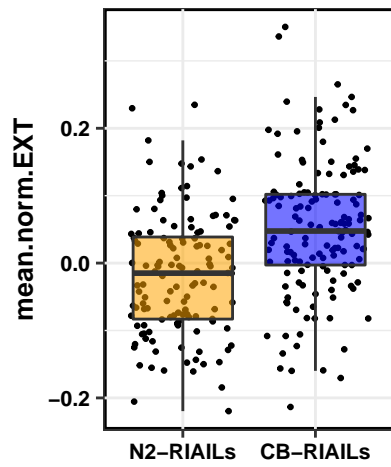

**A chlorothalonil.mean.TOF**

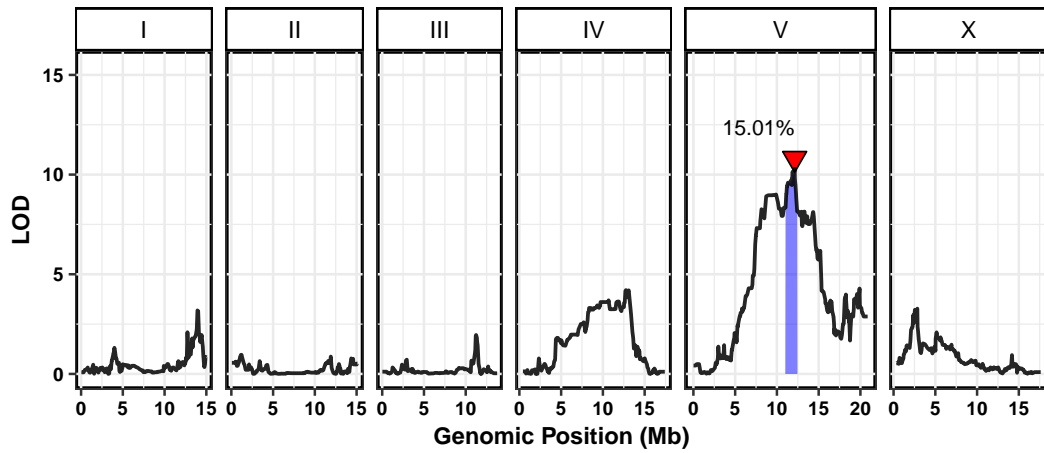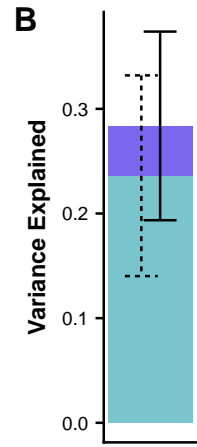

**C**

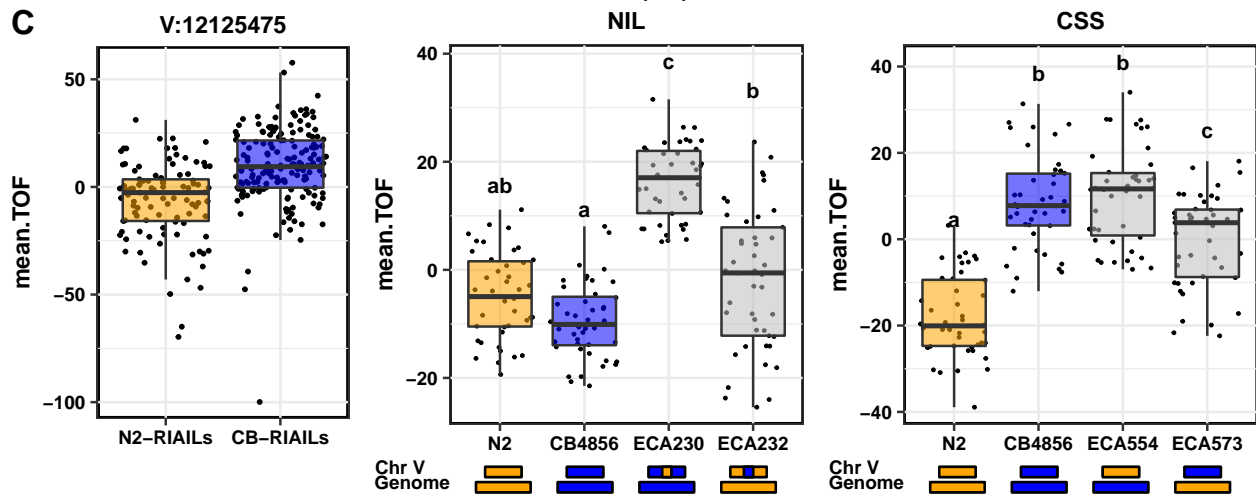

**A chlorothalonil.median.EXT**

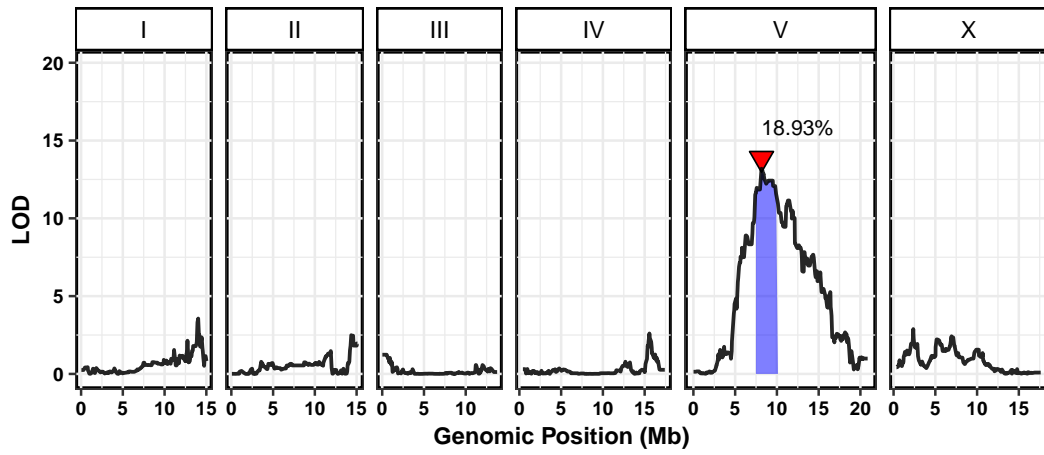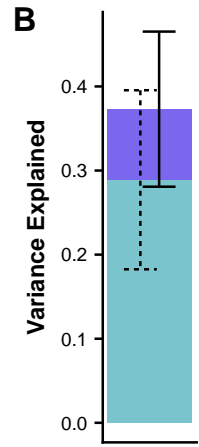

**C**

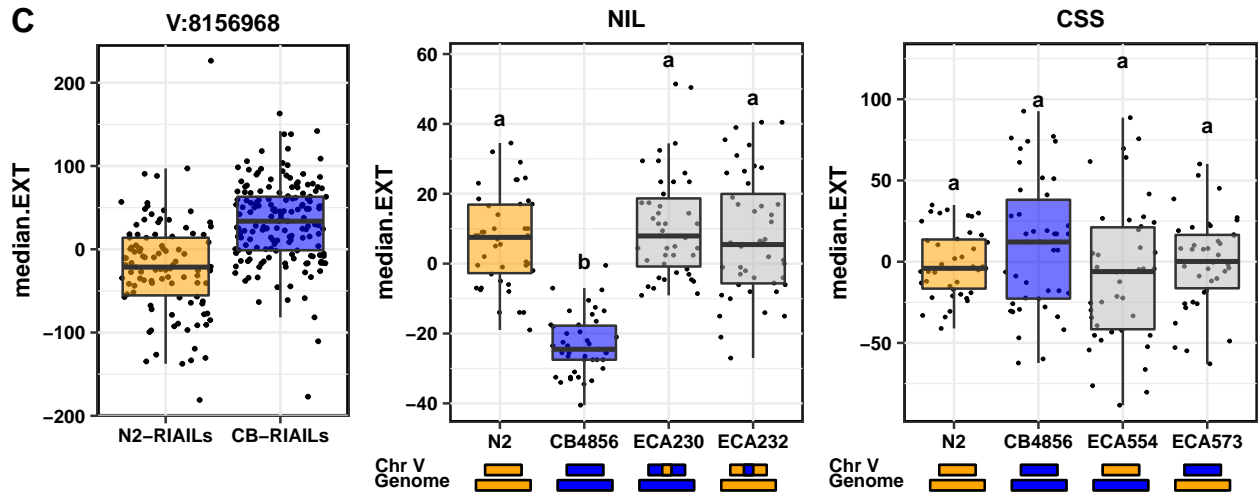

**A chlorothalonil.median.norm.EXT**

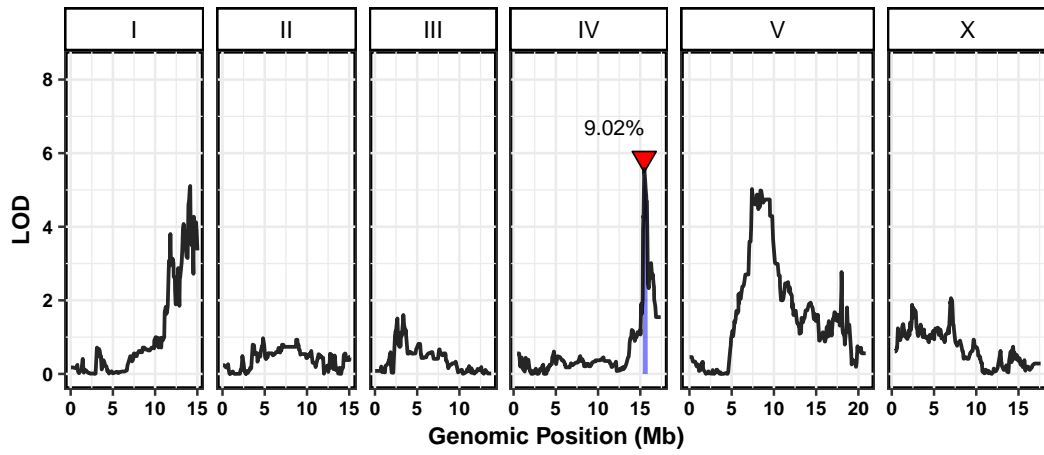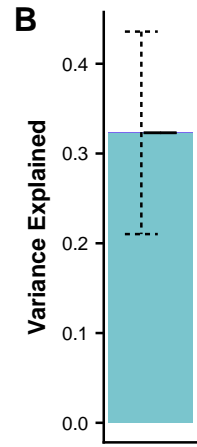

**C**

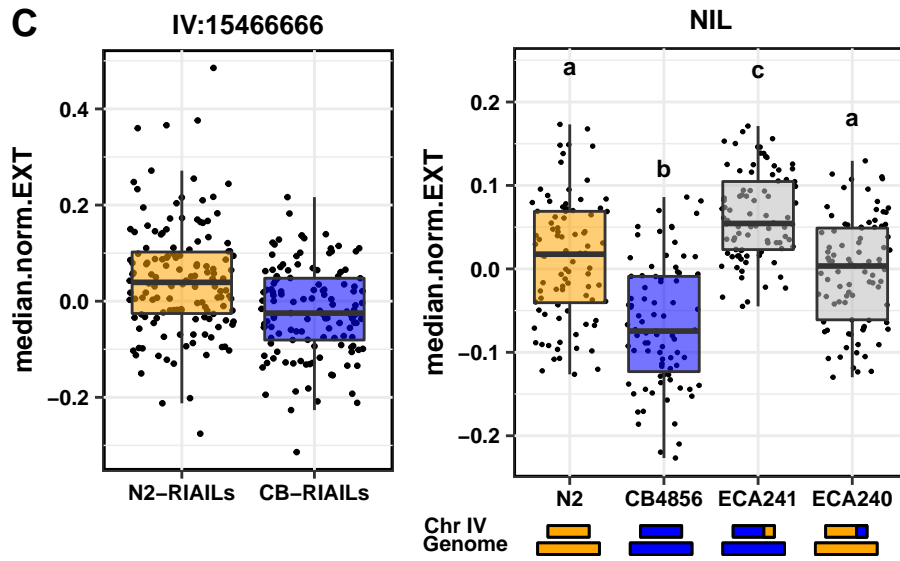



**A chlorothalonil.median.TOF**

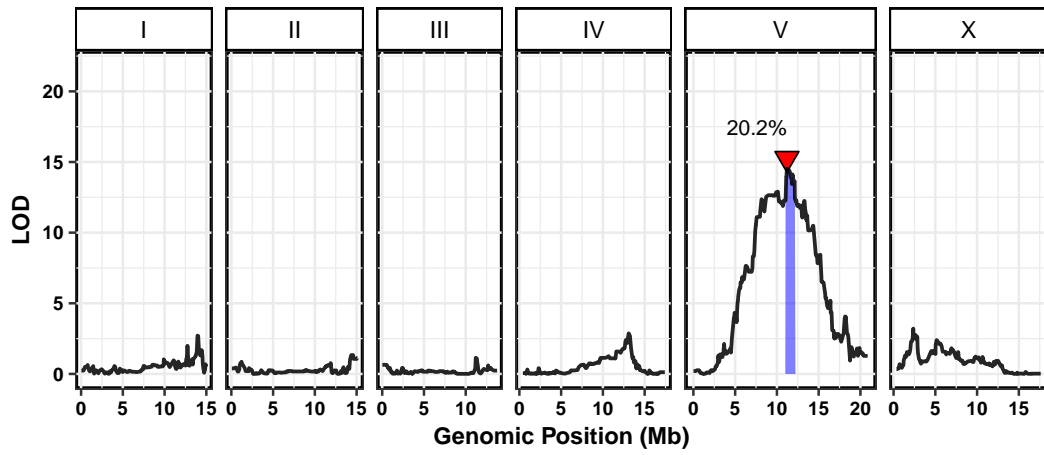

**B**

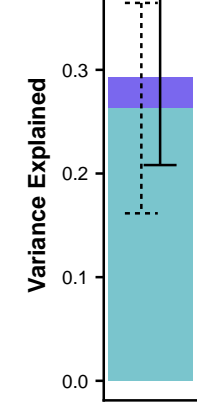

**C**

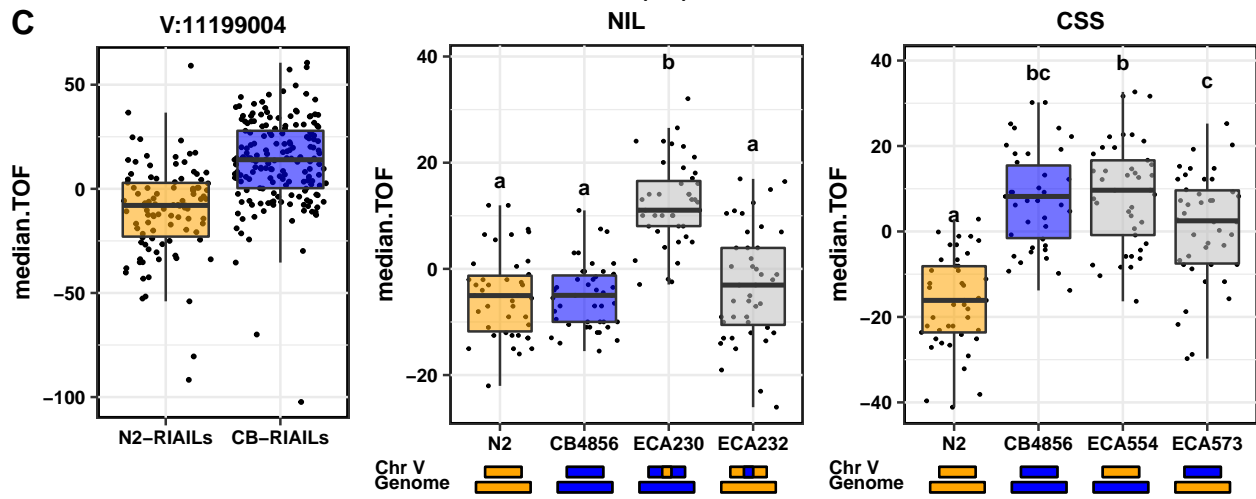

**A chlorothalonil.n**

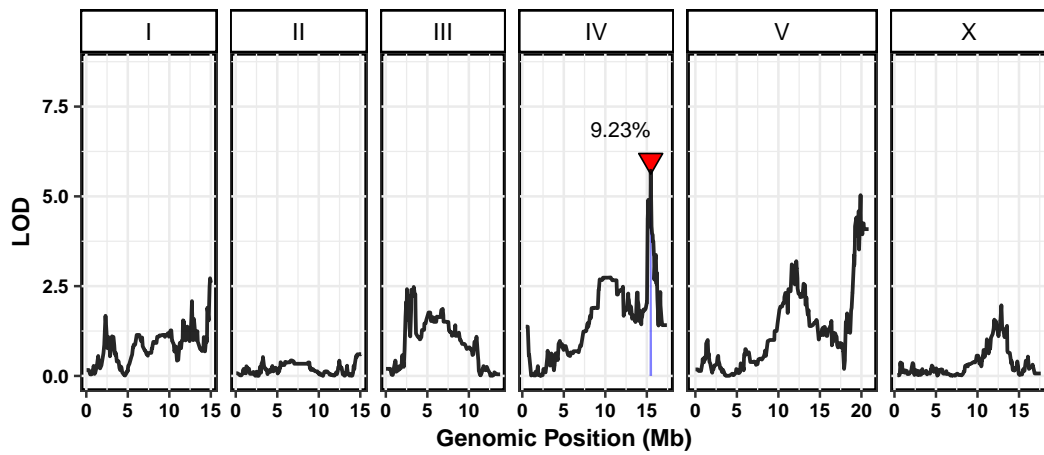

**B**

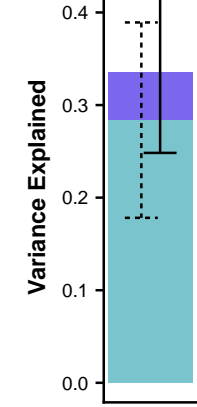

**C**

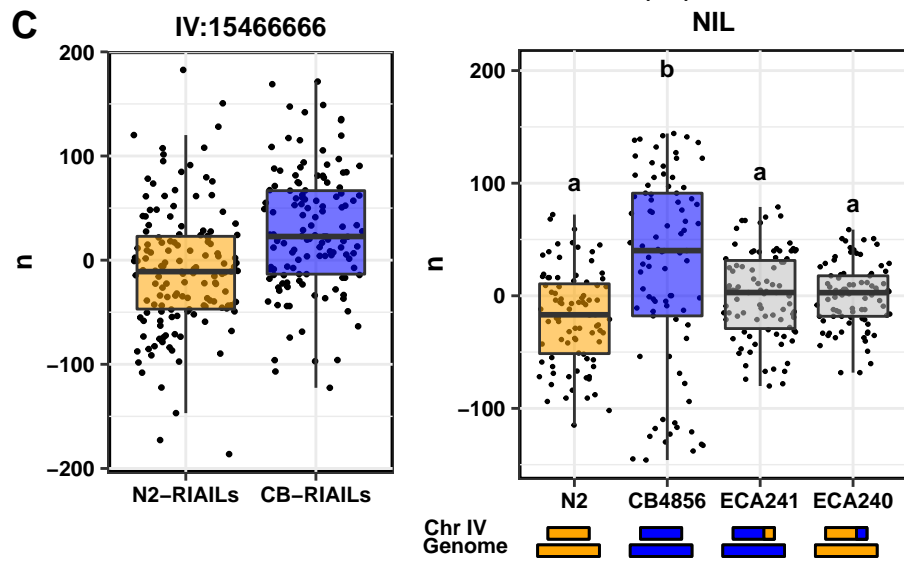

**A chlorothalonil.norm.n**

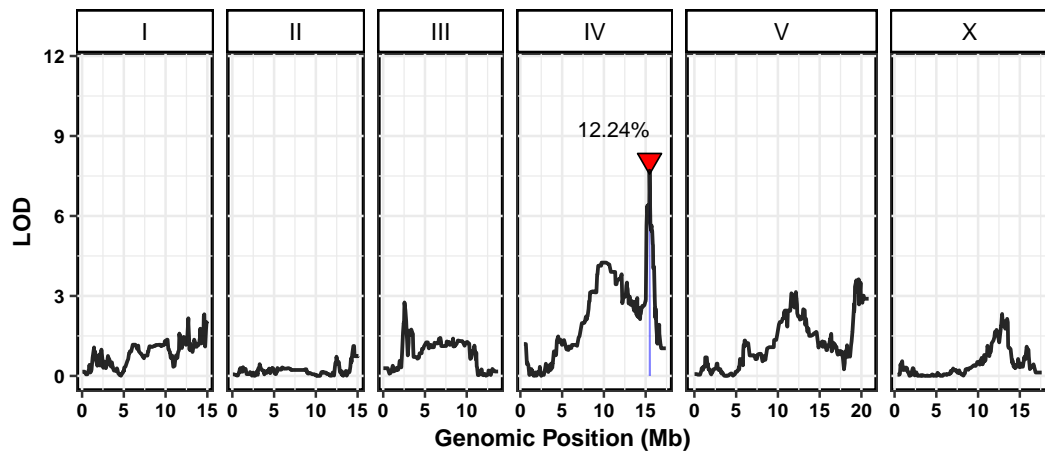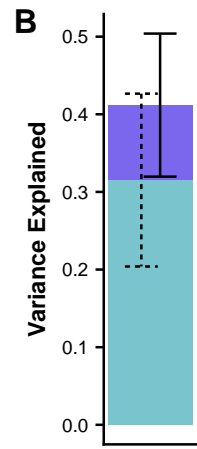

**C IV:15466666**

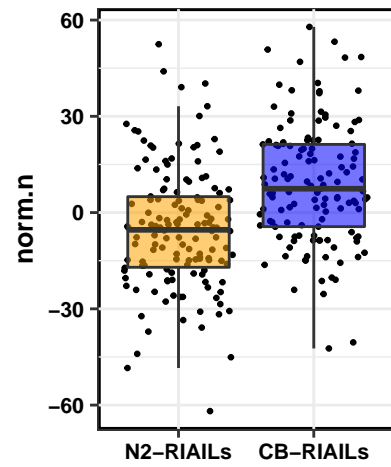

**NIL**

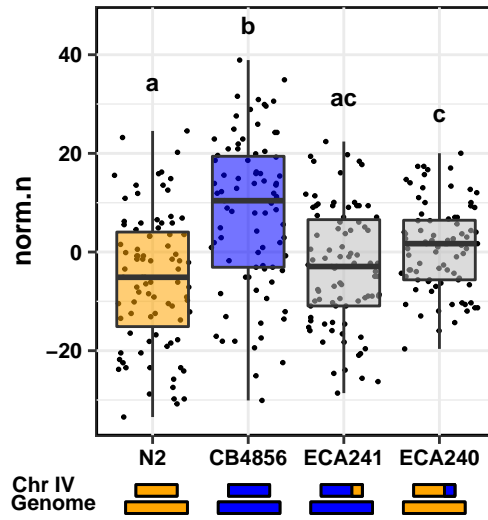

**A chlorothalonil.q10.EXT**

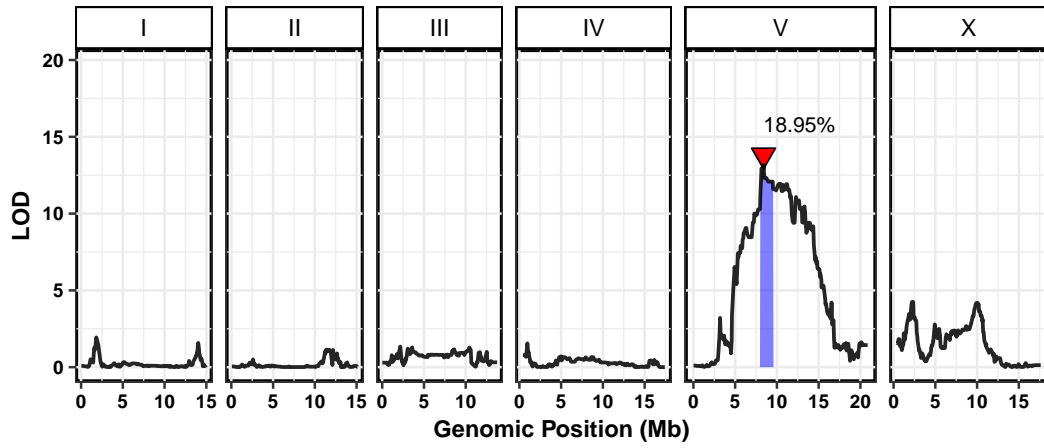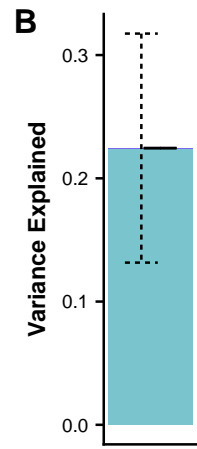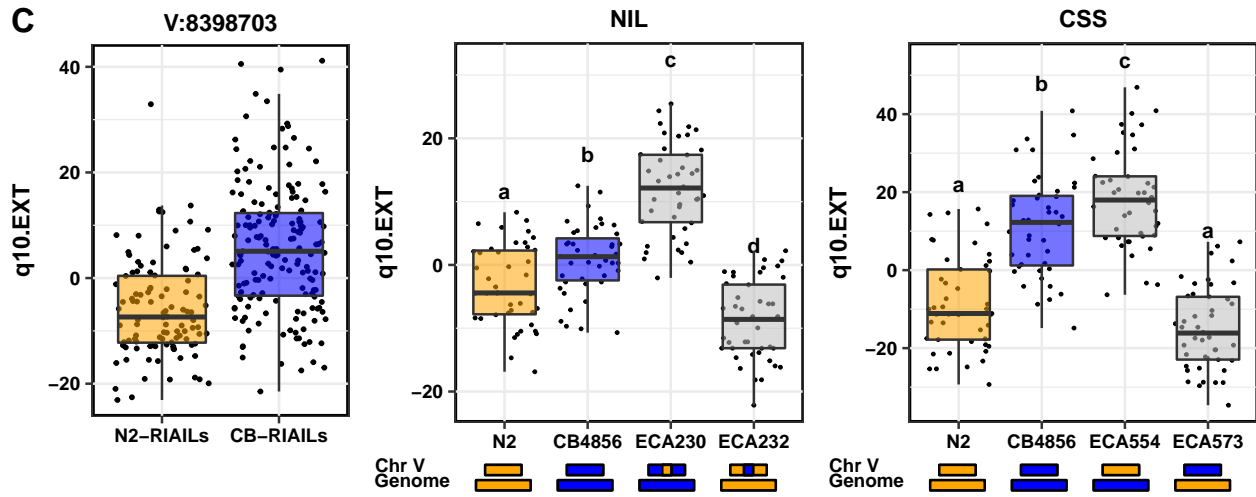

**A chlorothalonil.q10.TOF**

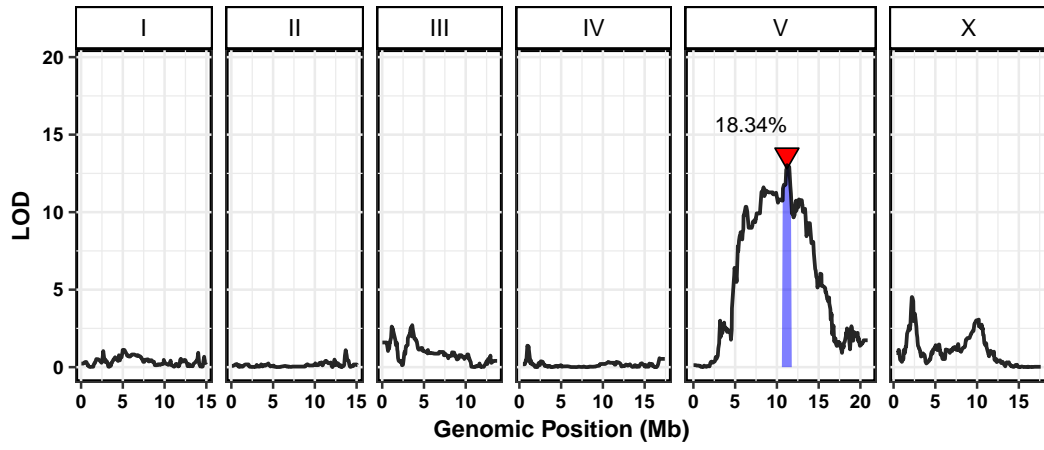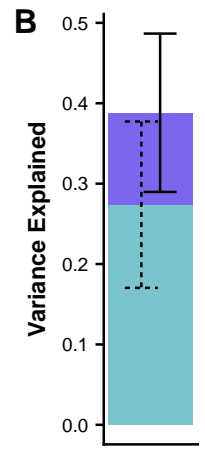

**C**

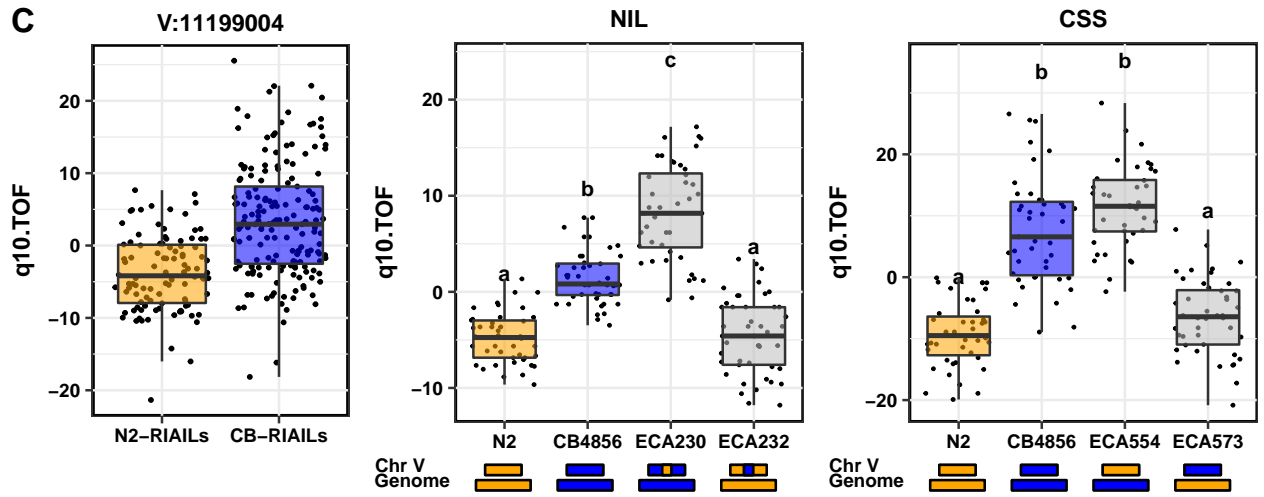

**A chlorothalonil.q25.EXT**

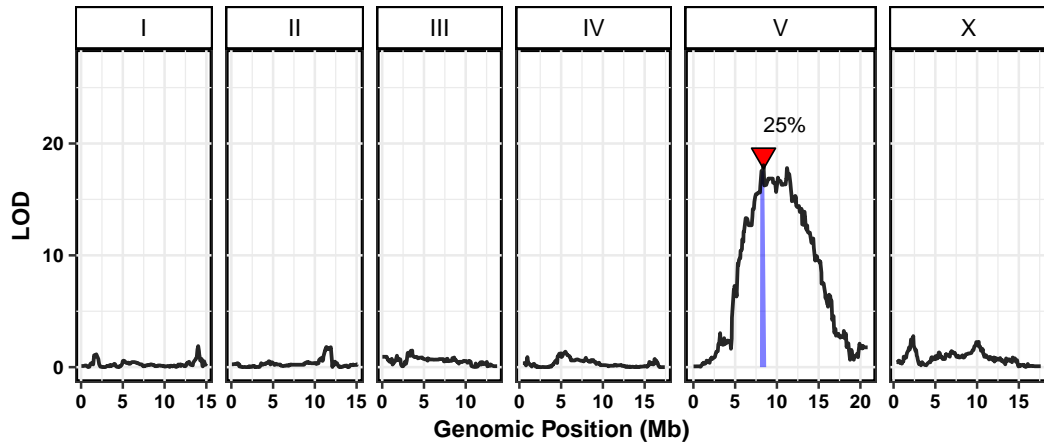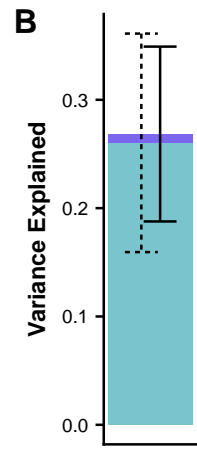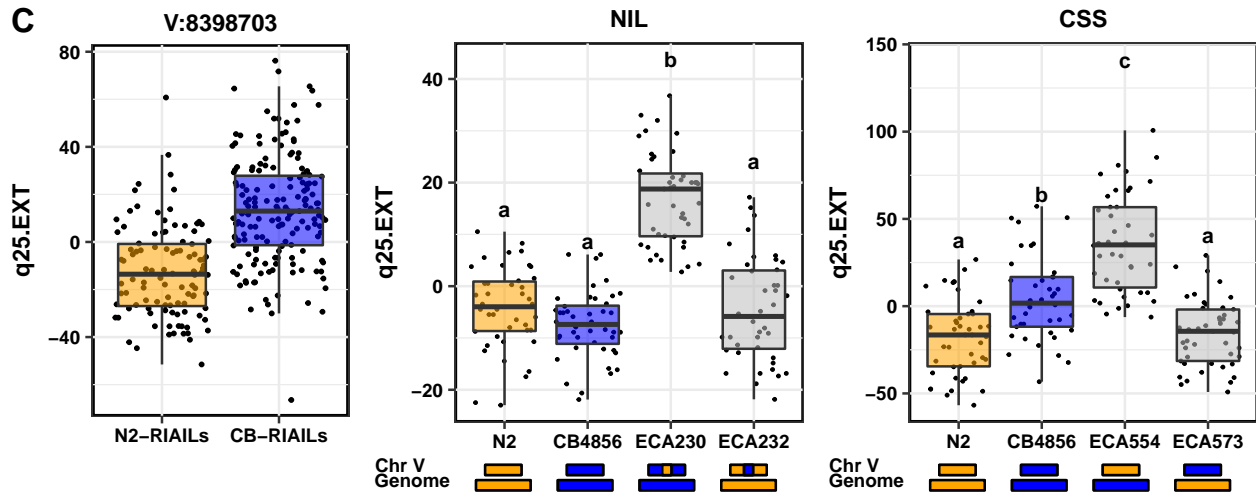

### A chlorothalonil.q25.norm.EXT

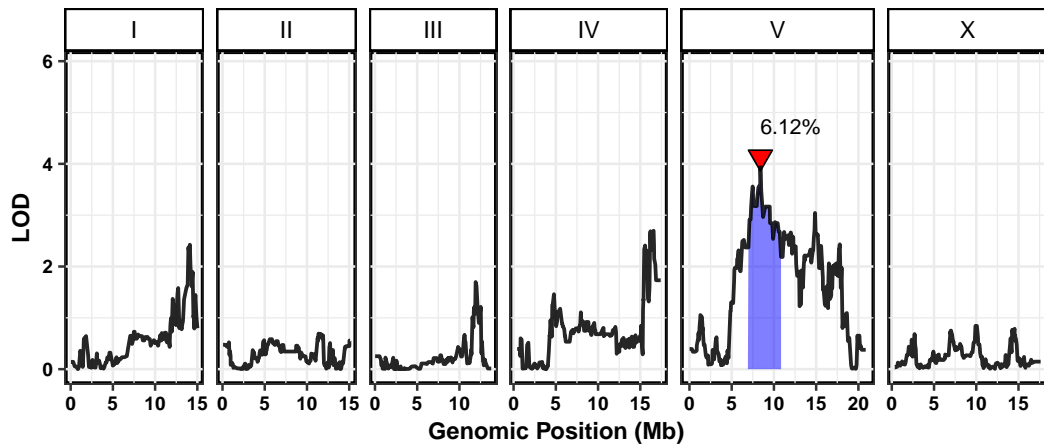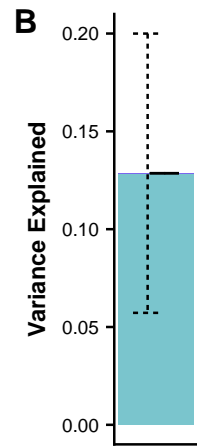

### C

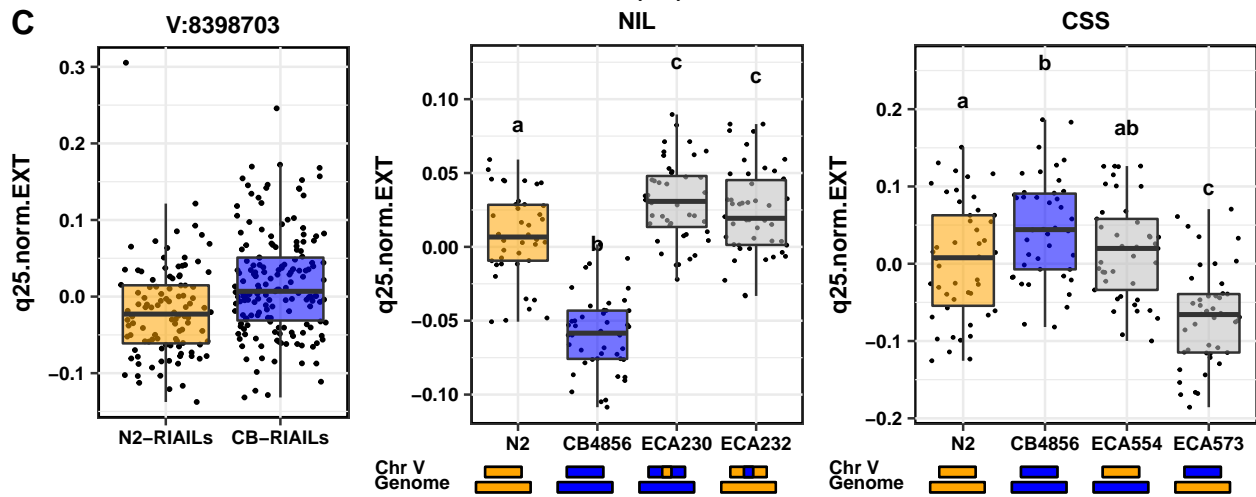

**A chlorothalonil.q25.TOF**

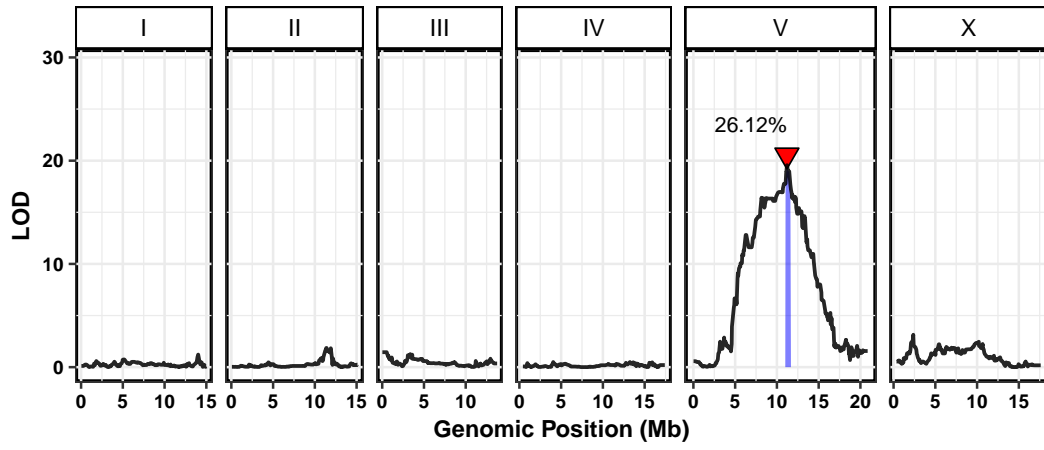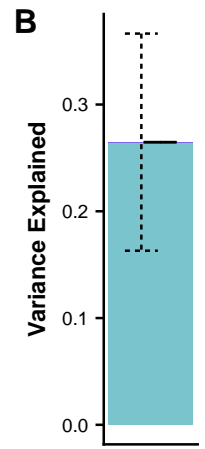

**C**

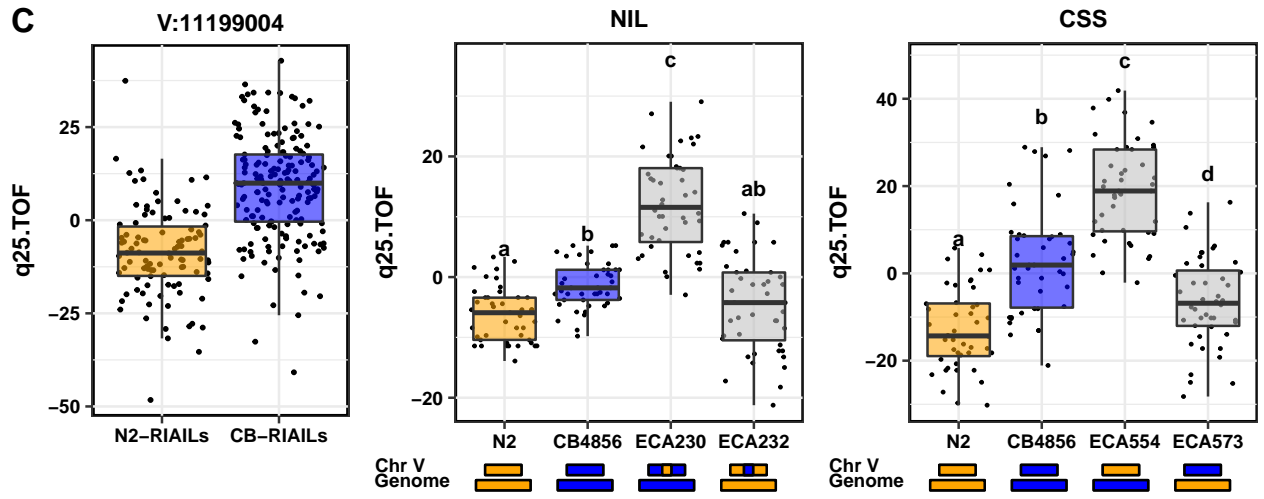



### A chlorothalonil.q75.EXT

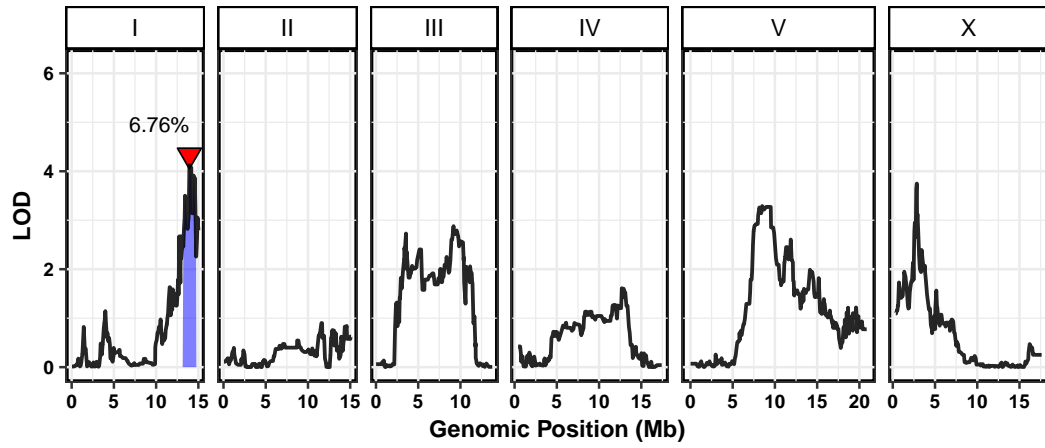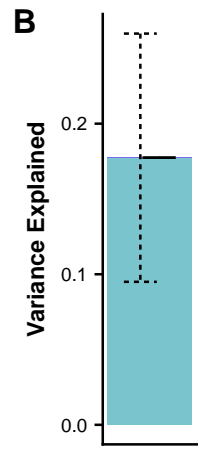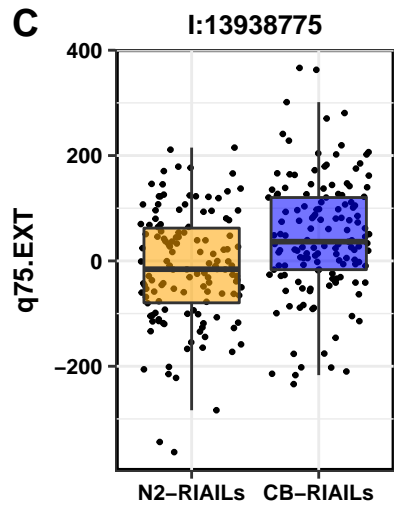

**A** chlorothalonil.q75.norm.EXT

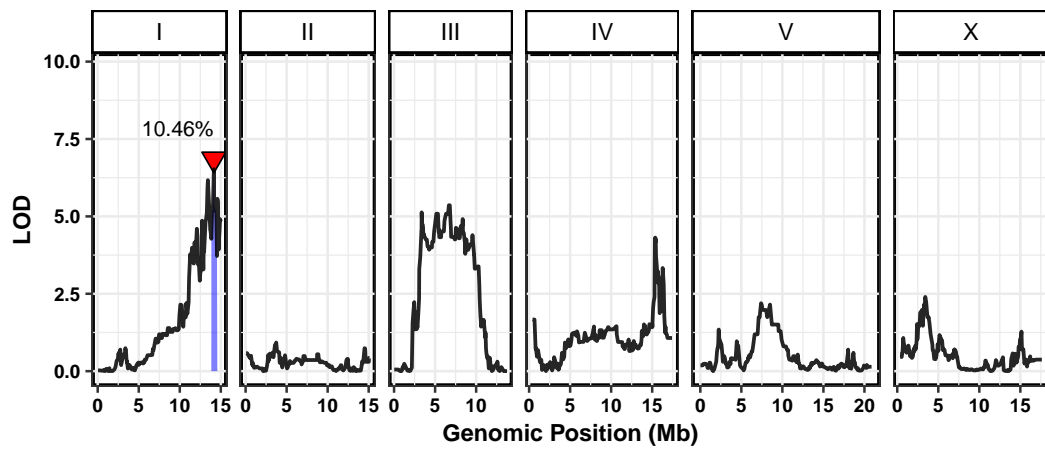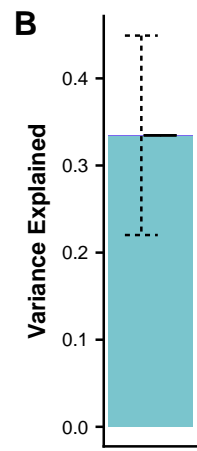

**C** I:14155589

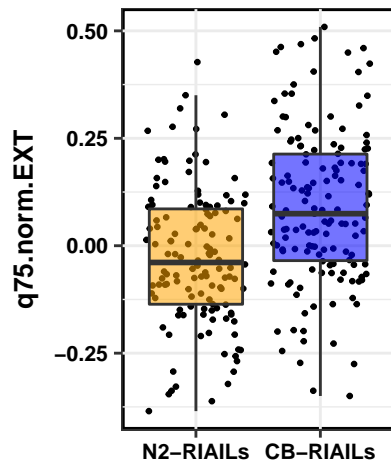

**A chlorothalonil.q75.TOF**

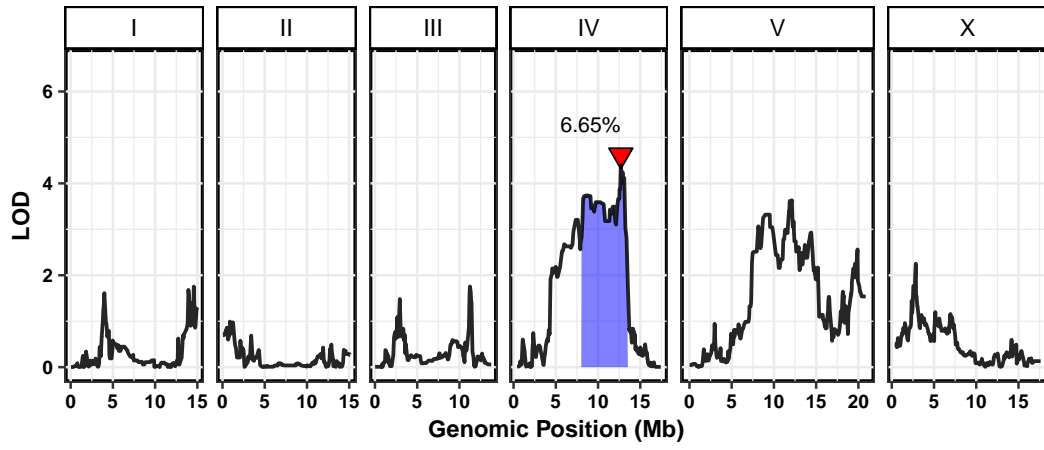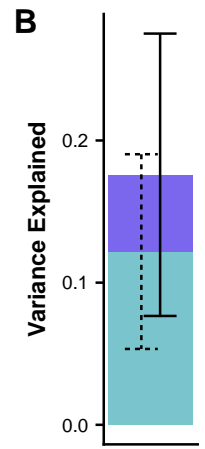

**C IV:12694976**

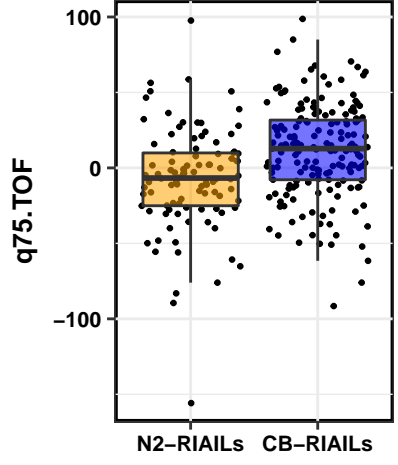

**NIL**

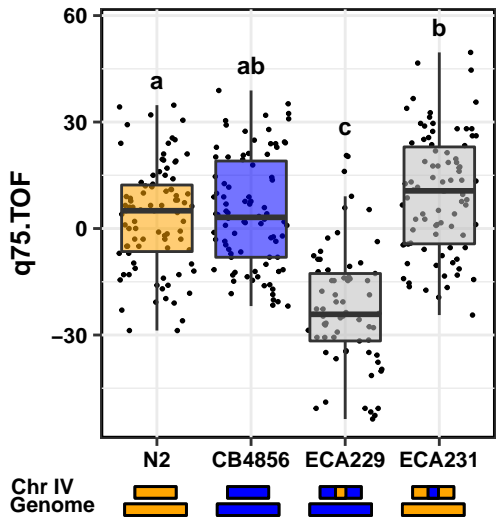

### A chlorothalonil.q90.EXT

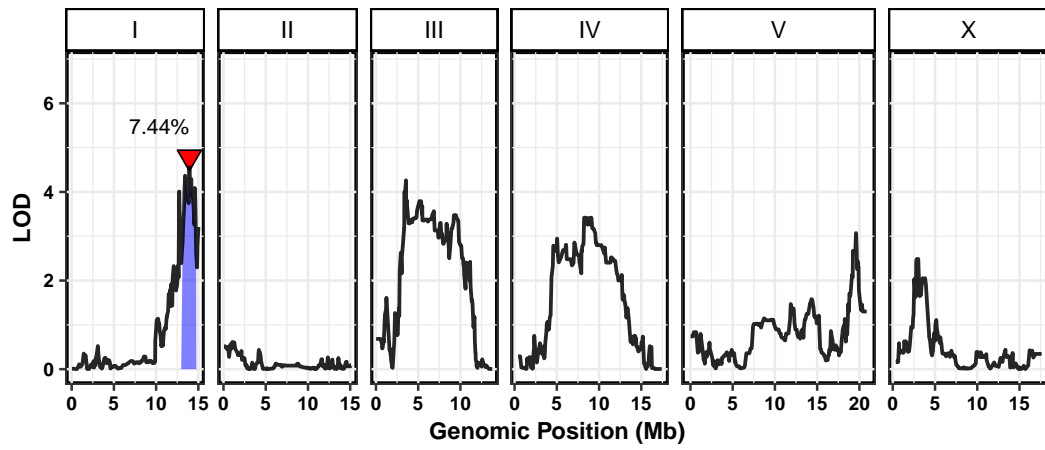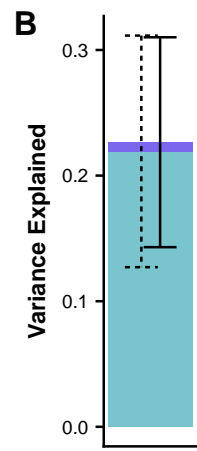

### C I:13938775

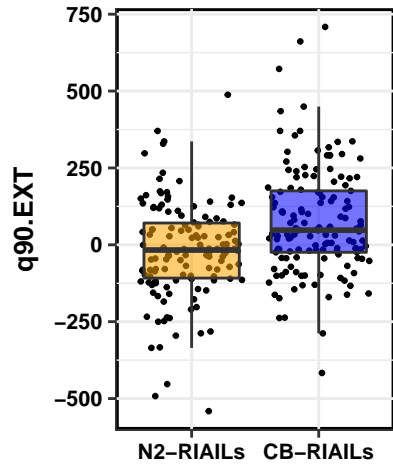

### A chlorothalonil.q90.norm.EXT

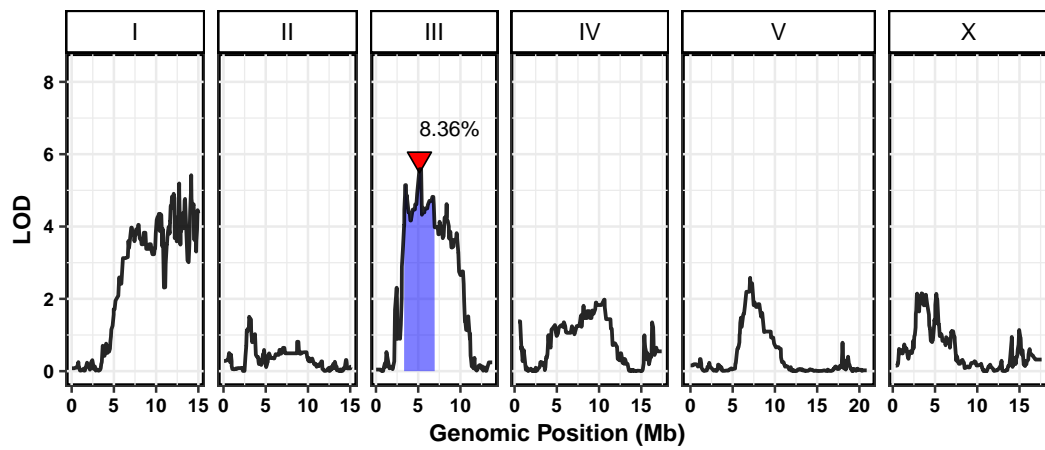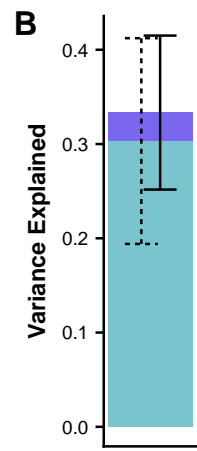

### C III:5150289

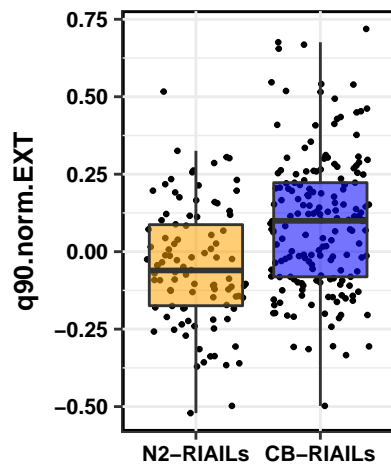

**A chlorothalonil.q90.TOF**

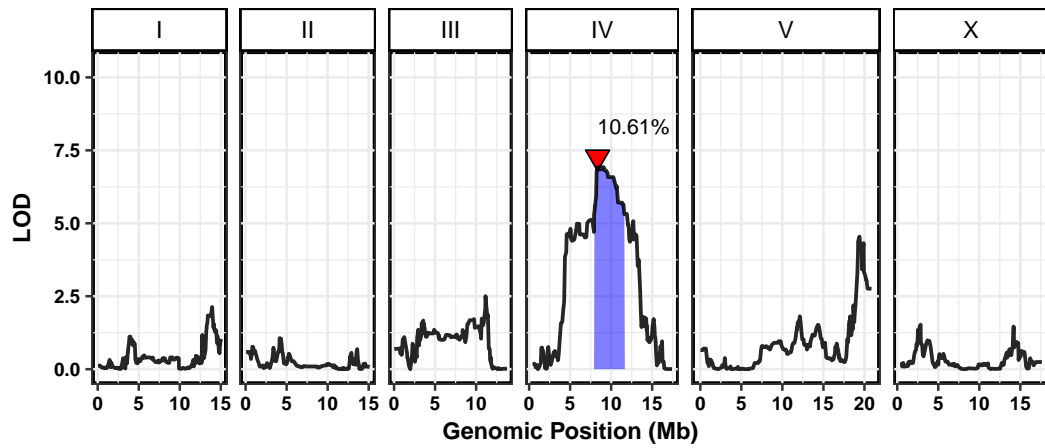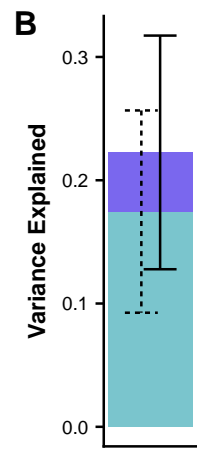

**C**

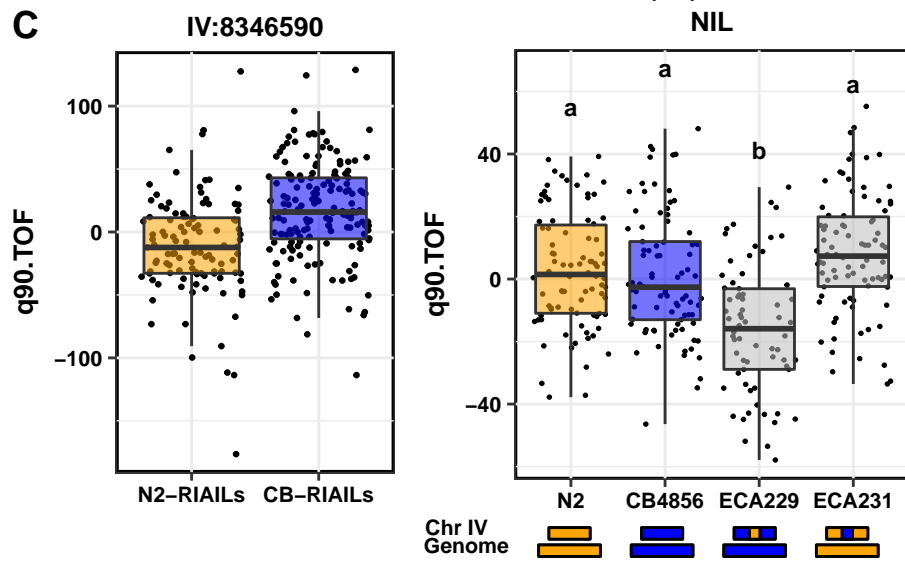

### A chlorothalonil.var.EXT

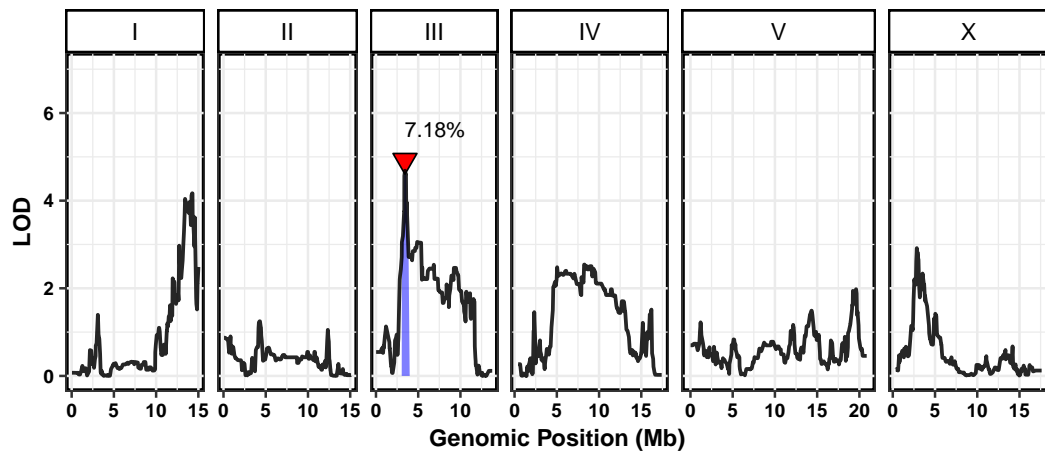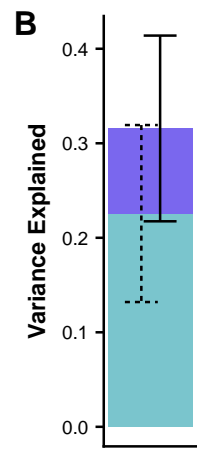

### C

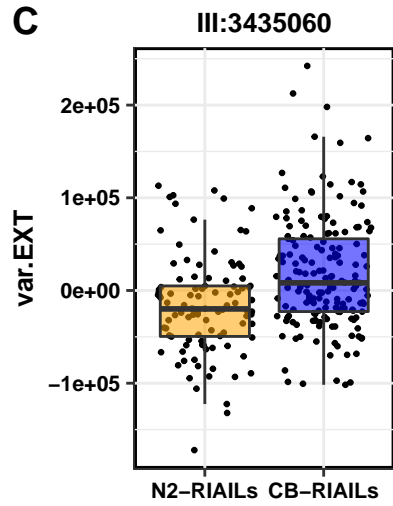

**A chlorothalonil.var.TOF**

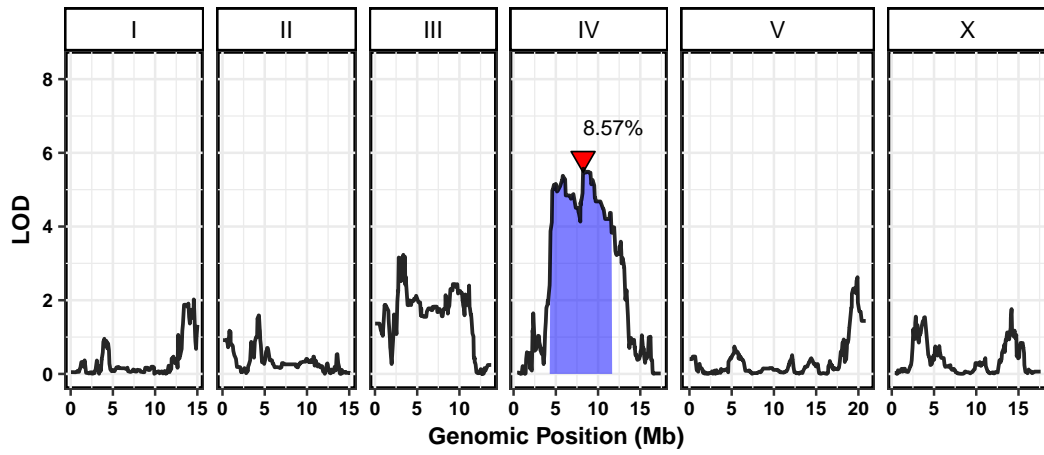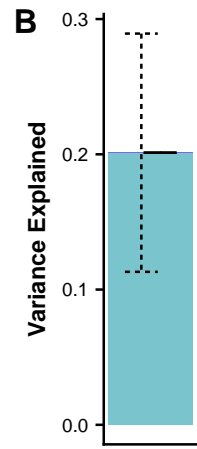

**C IV:8228724**

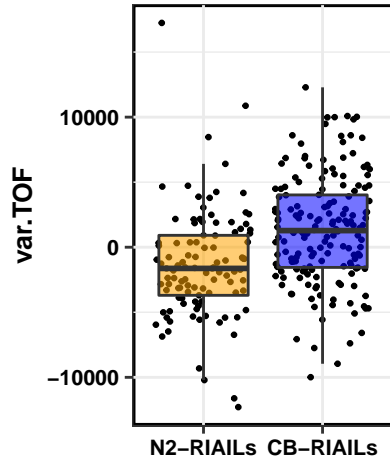

**NIL**

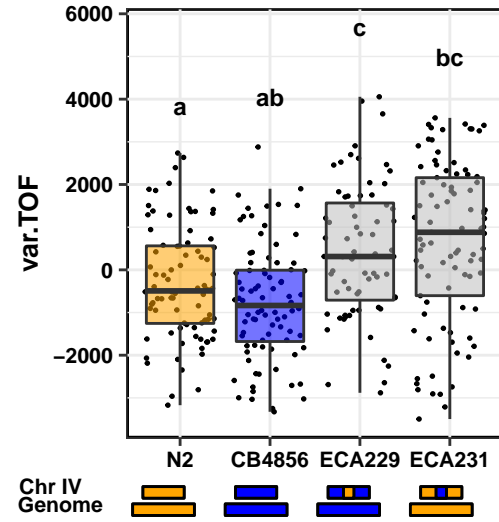



### A chlorpyrifos.cv.TOF

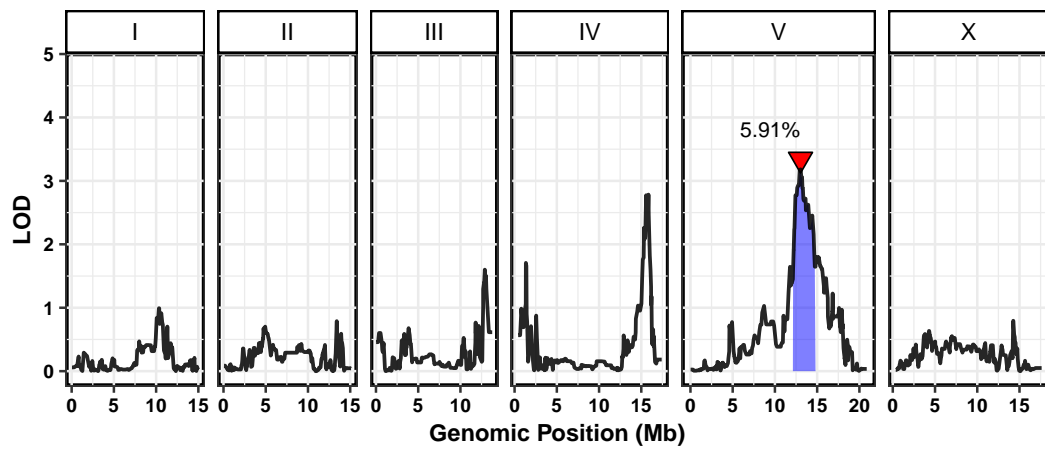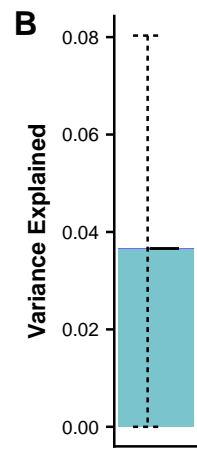

### C V:13031375

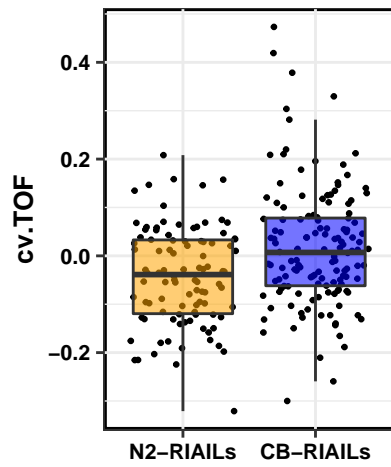

### A chlorpyrifos.mean.norm.EXT

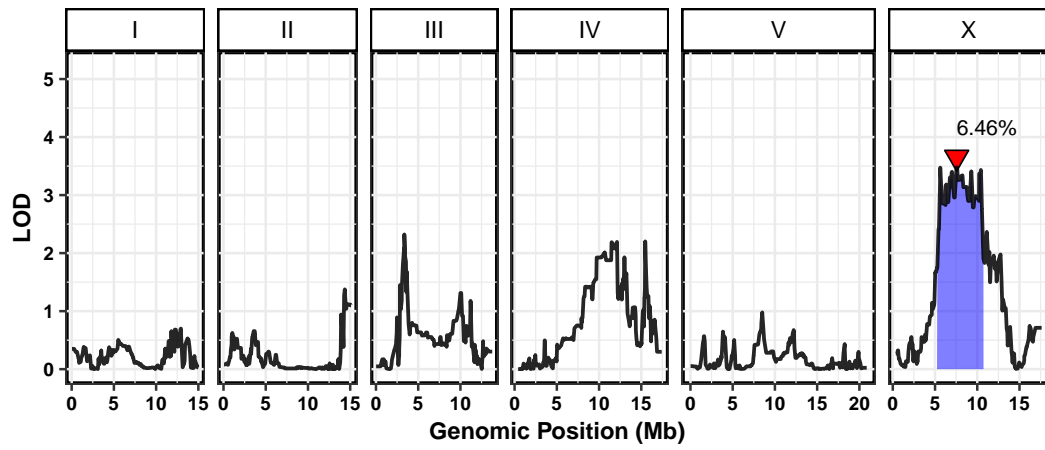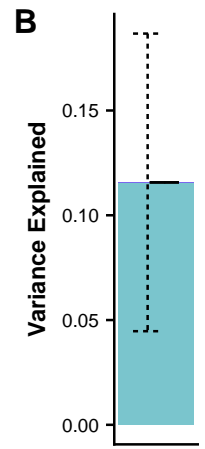

### C

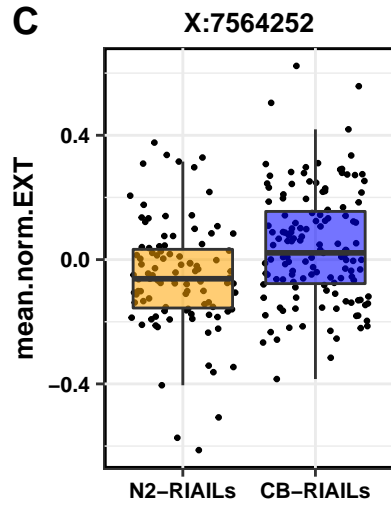

### A chlorpyrifos.median.norm.EXT

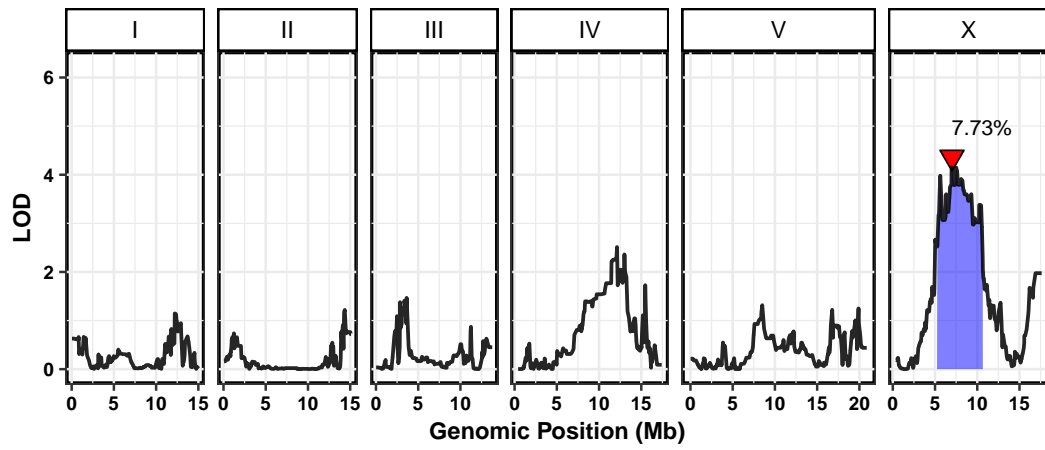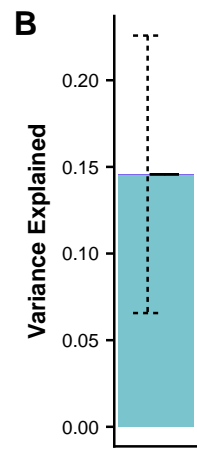

### C X:7009811

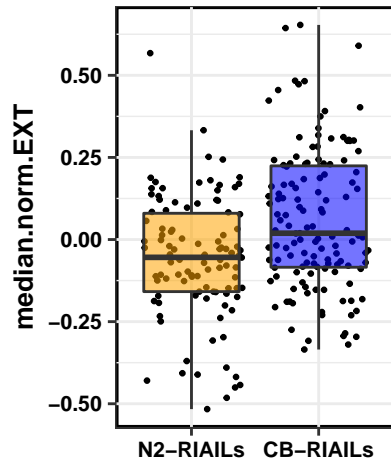

### A chlorpyrifos.q25.norm.EXT

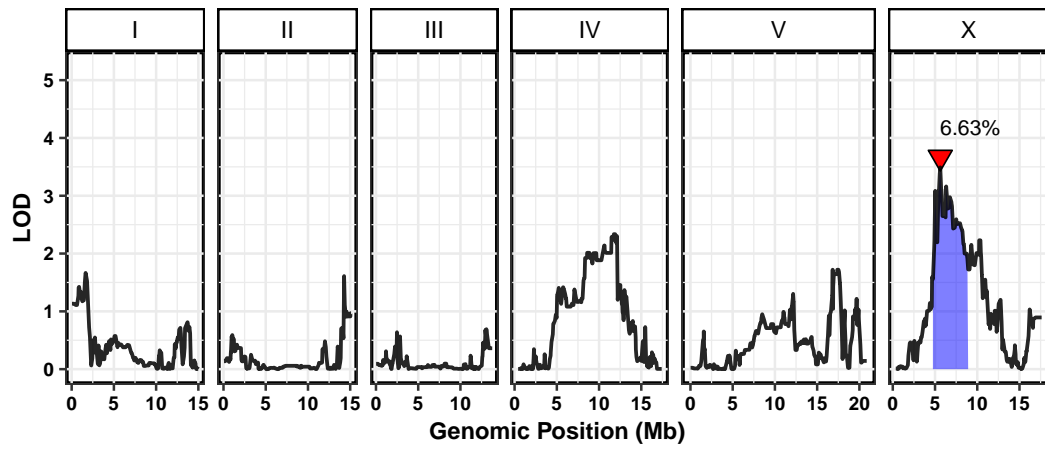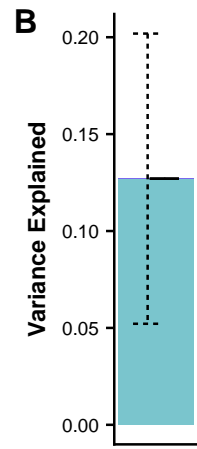

### C

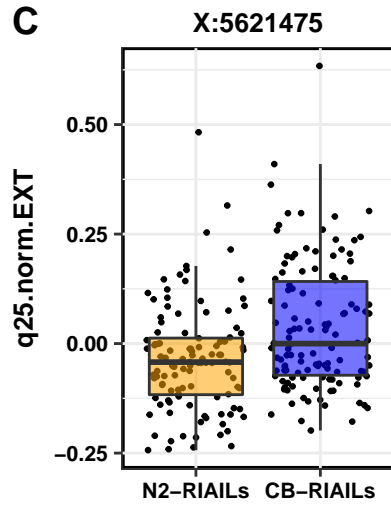

### A chlorpyrifos.q75.EXT

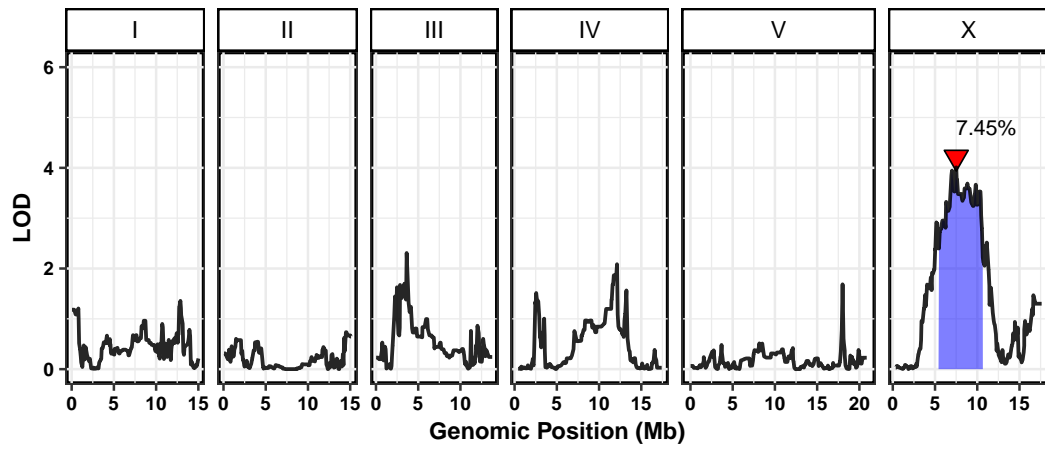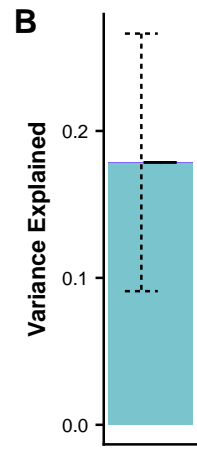

### C X:7513586

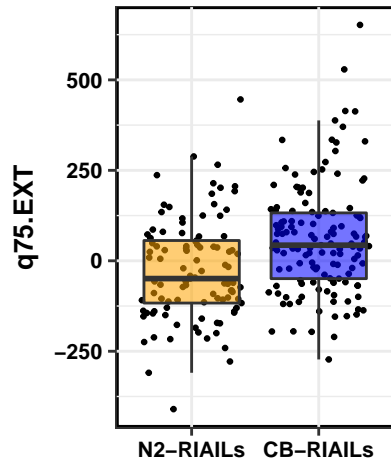

### A chlorpyrifos.q90.TOF

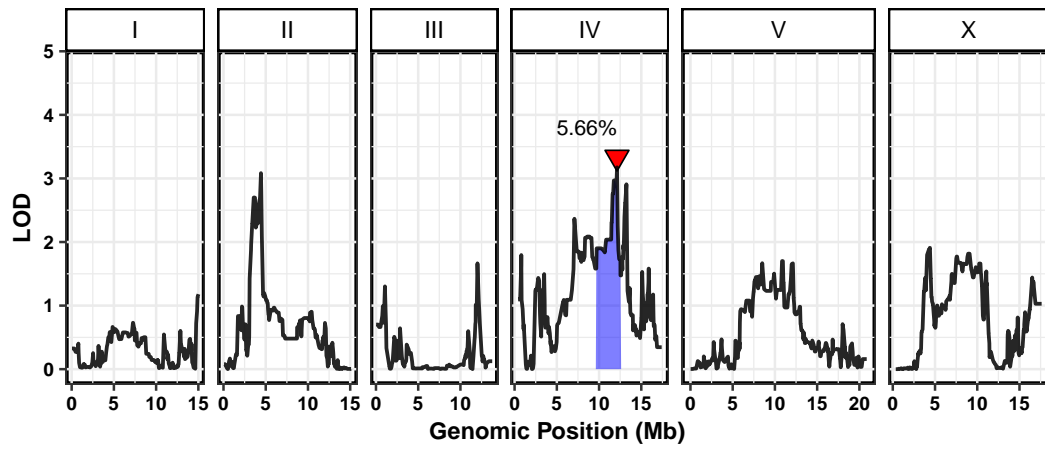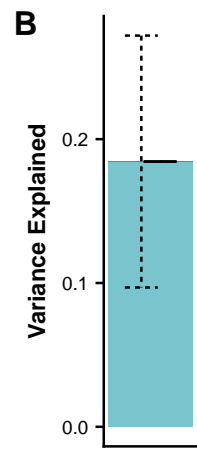

### C IV:12124893

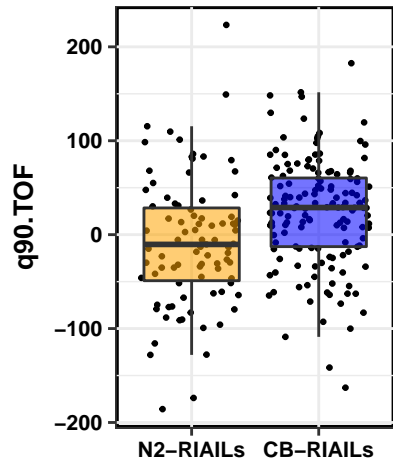

### A cisplatin.cv.EXT

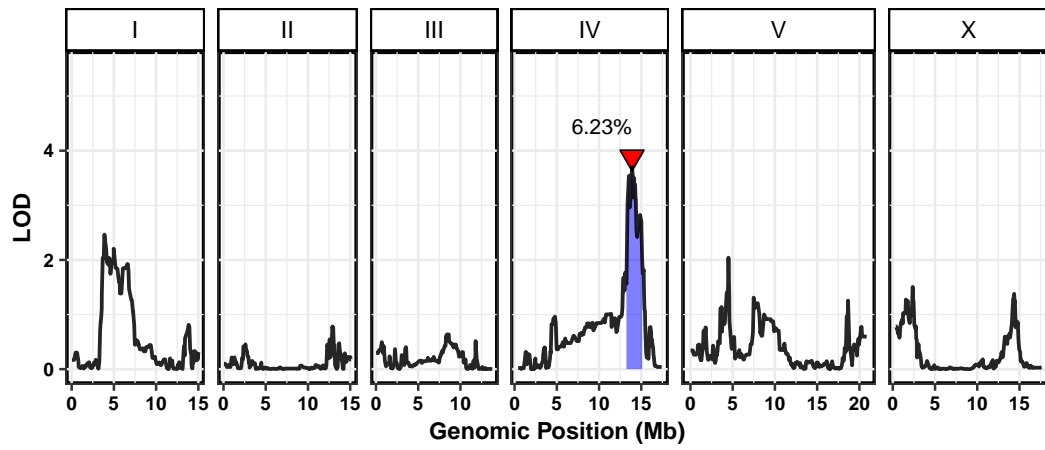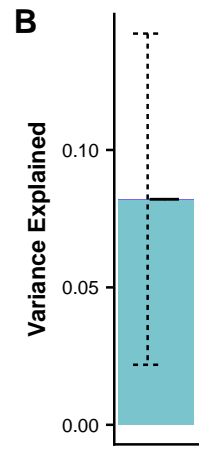

### C IV:13904356

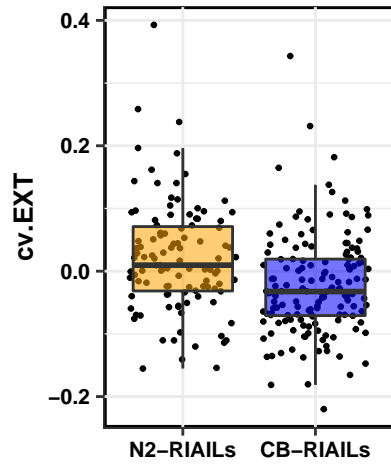

### A cisplatin.cv.TOF

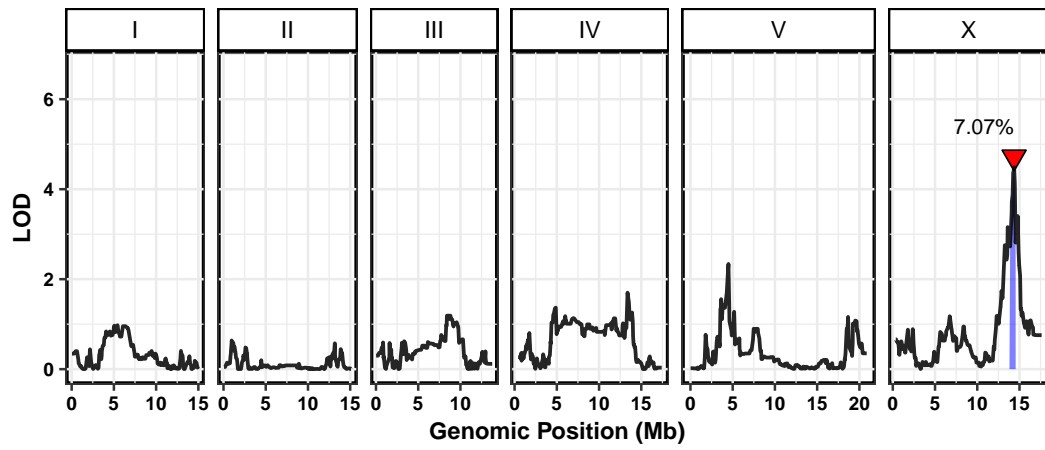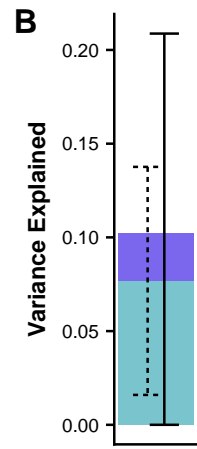

### C X:14364921

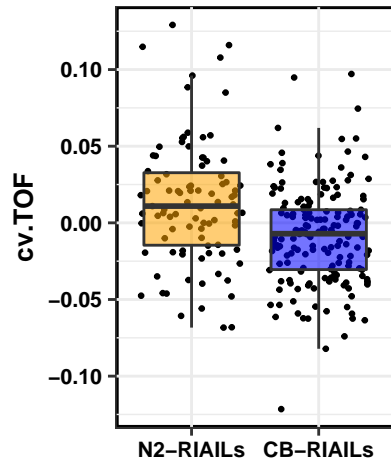



**A cisplatin.mean.EXT**

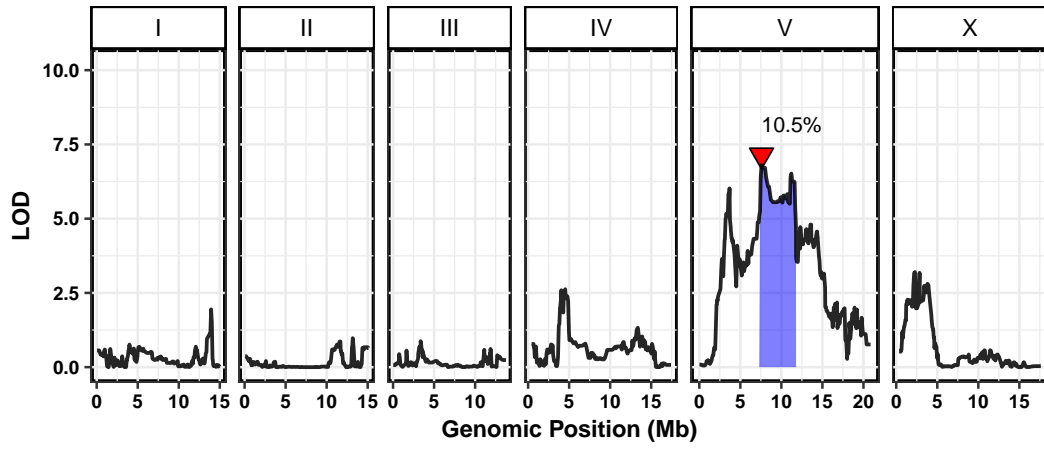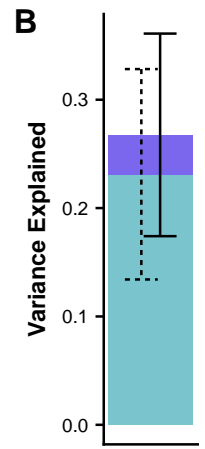

**C**

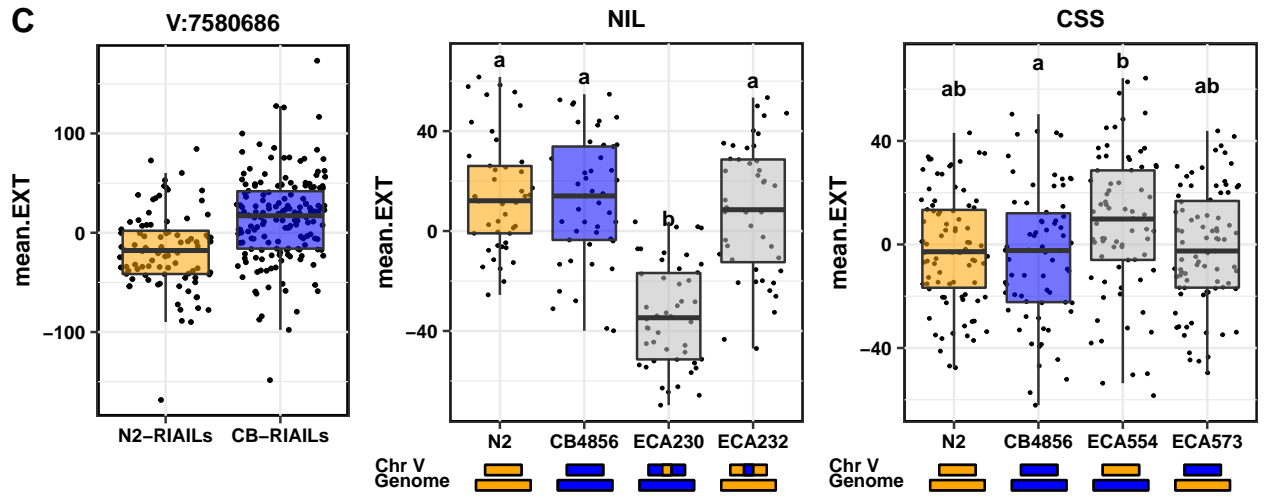

### A cisplatin.mean.norm.EXT

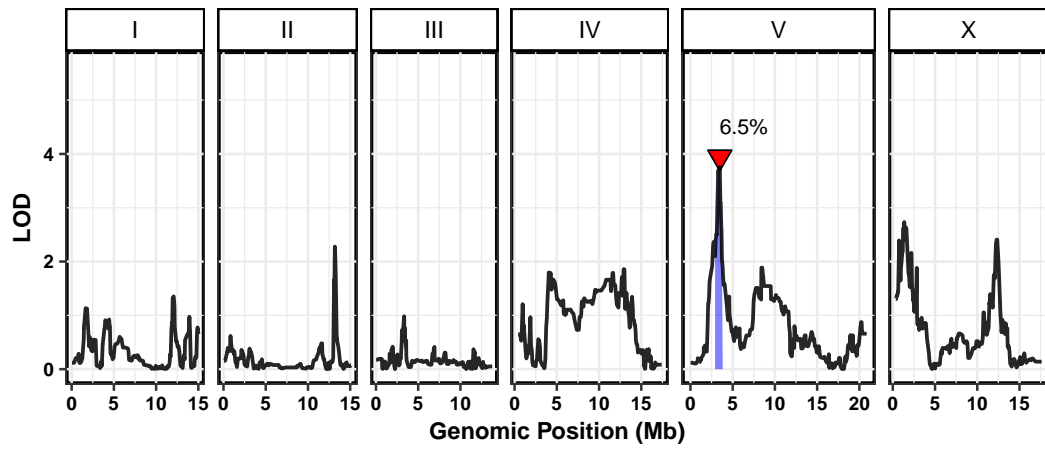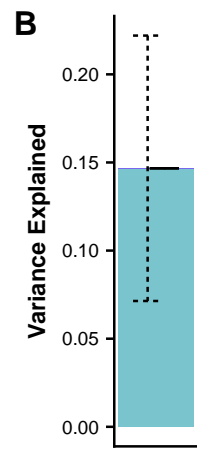

### C

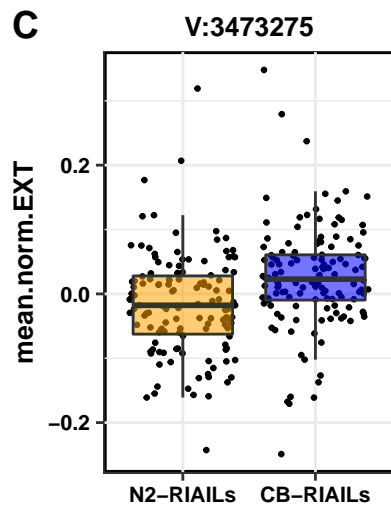

**A cisplatin.mean.TOF**

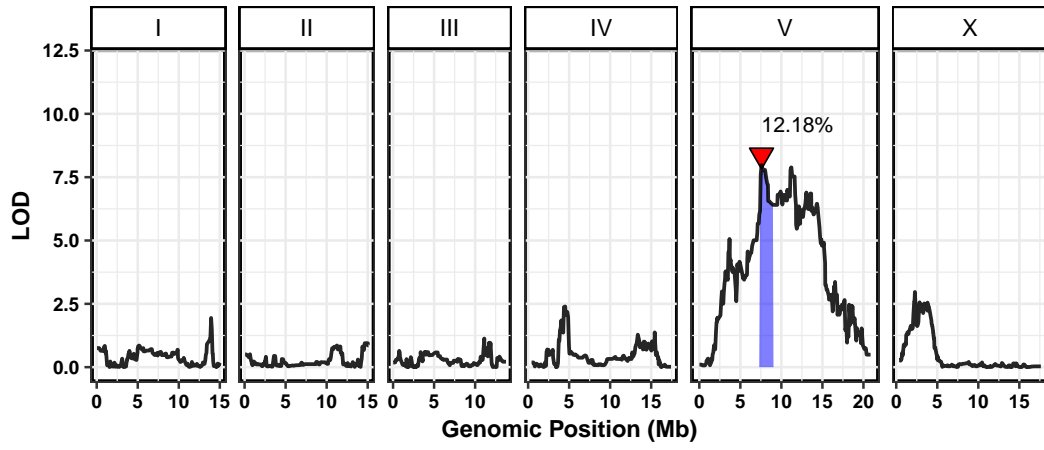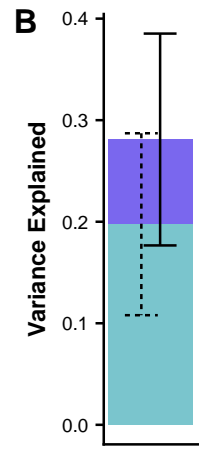

**C V:7580686**

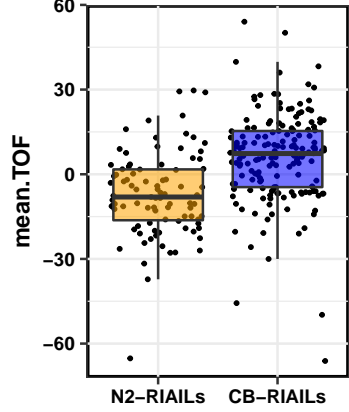

**NIL**

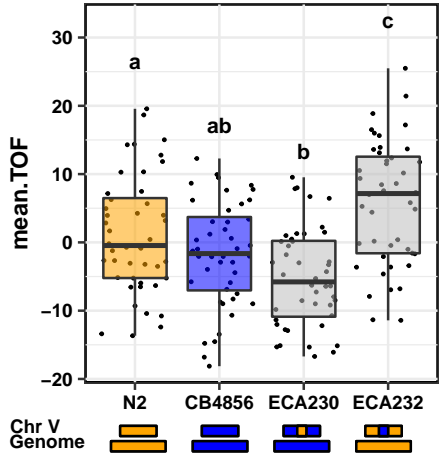

**CSS**

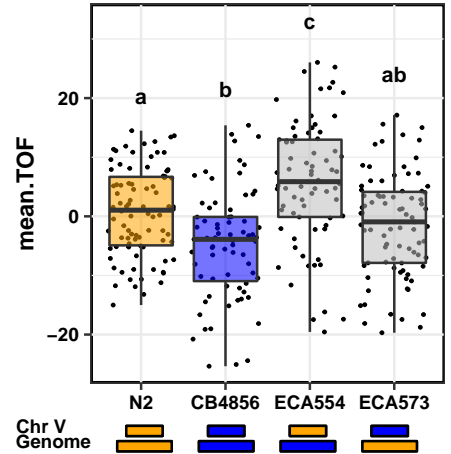

### A cisplatin.median.EXT

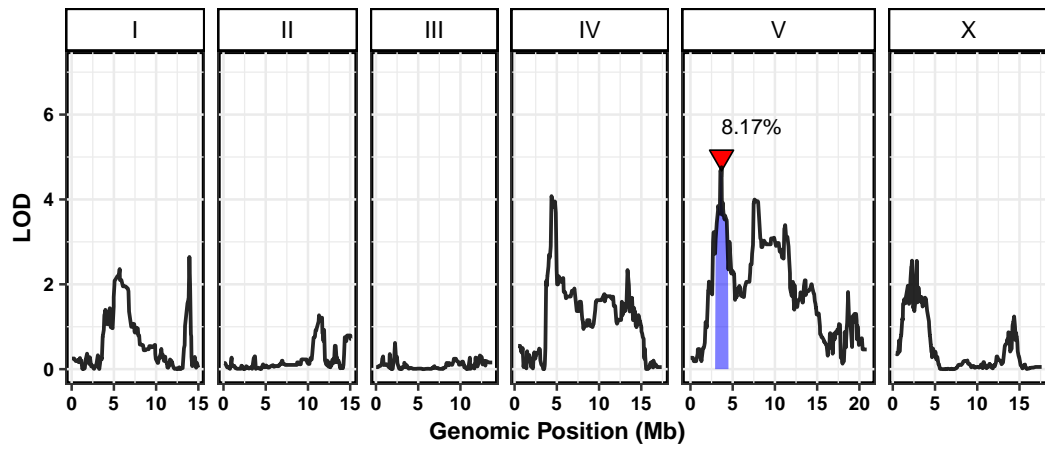

### B

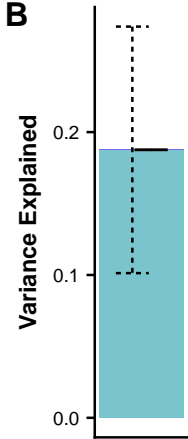

### C

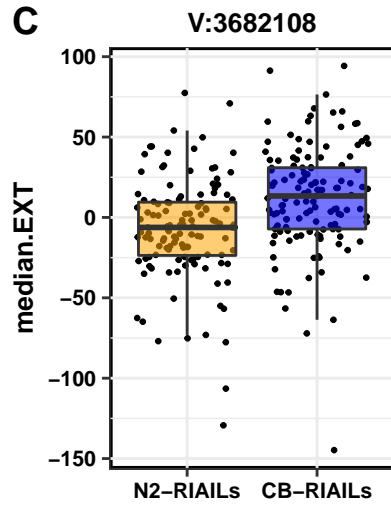

**A cisplatin.median.norm.EXT**

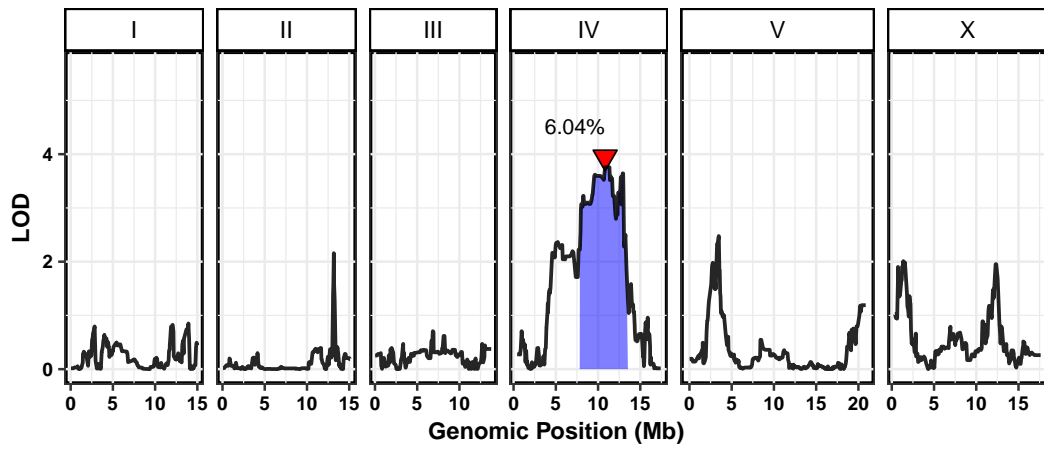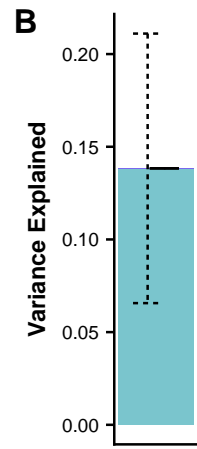

**C**

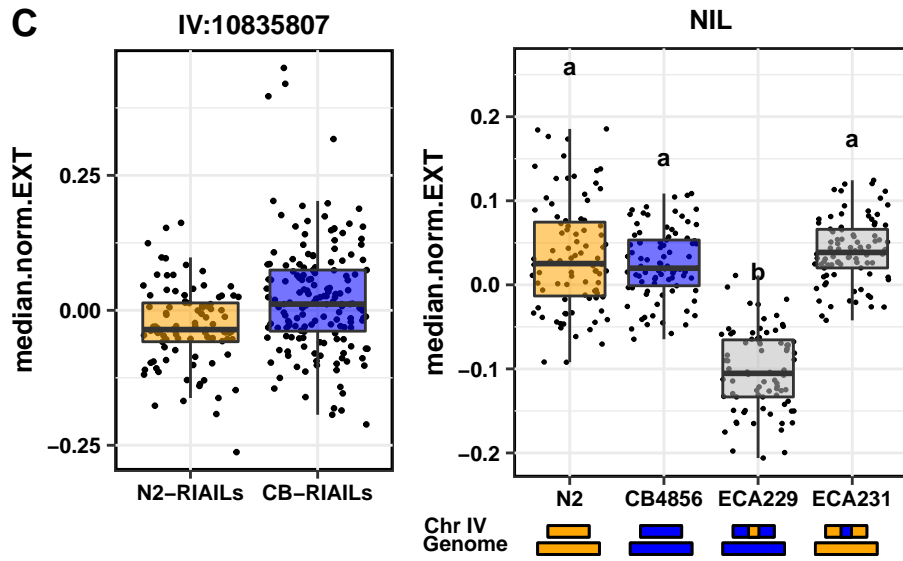

### A cisplatin.median.TOF

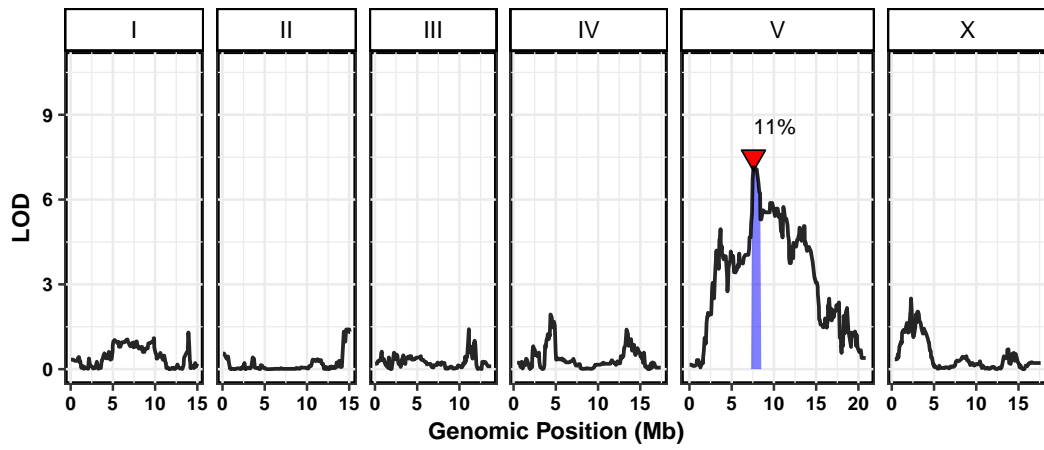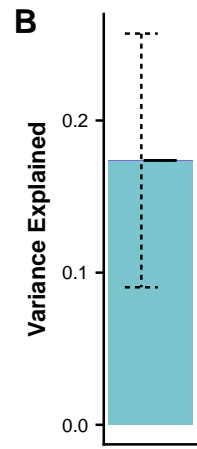

### C

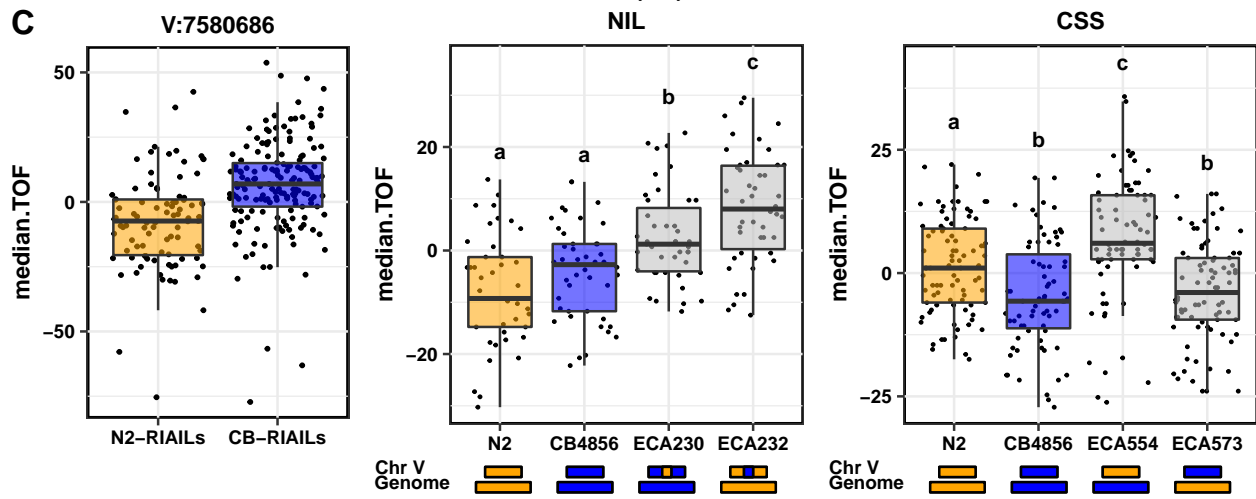

**A cisplatin.norm.n**

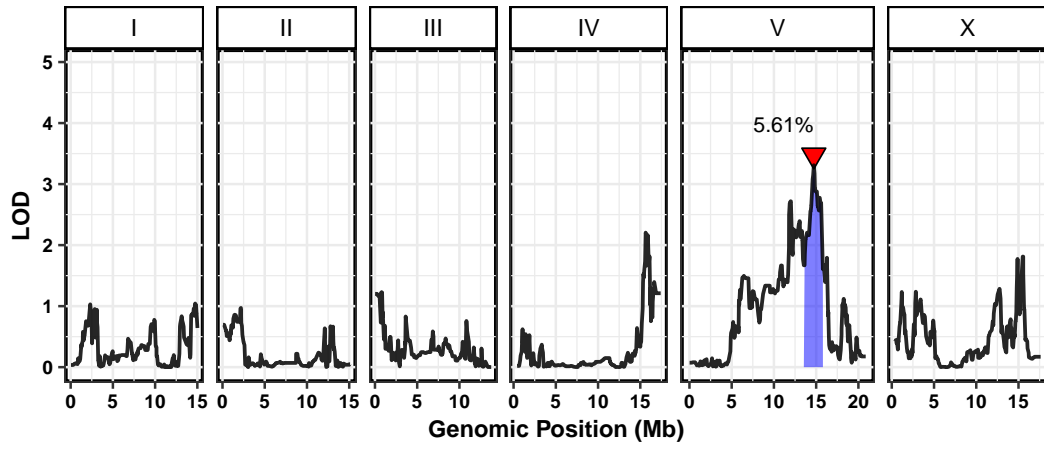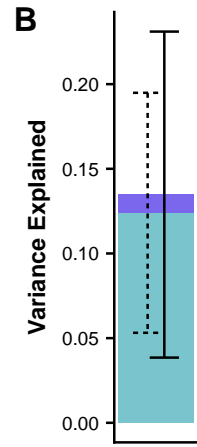

**C**

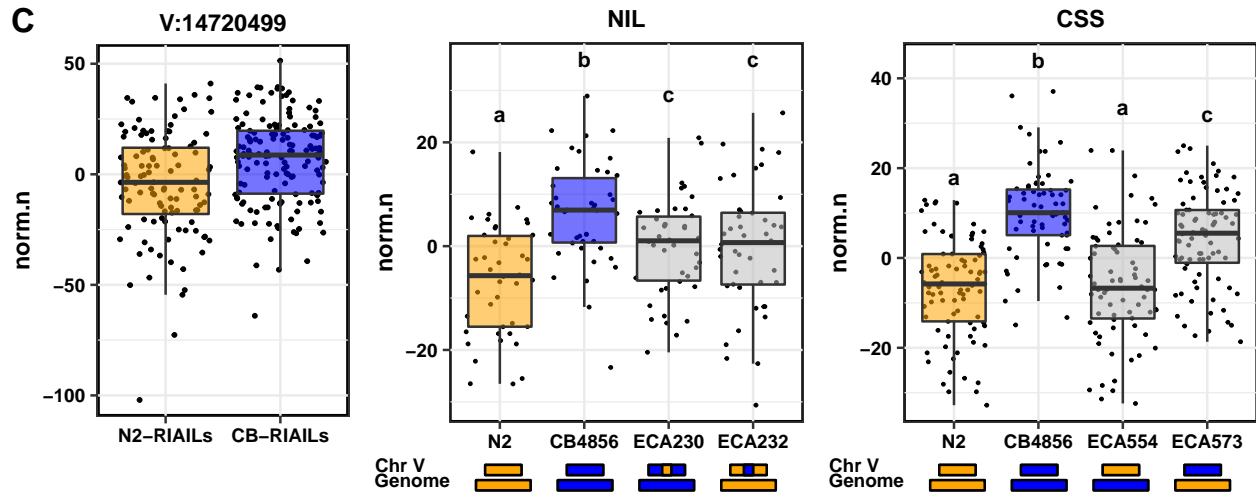

**A cisplatin.q10.EXT**

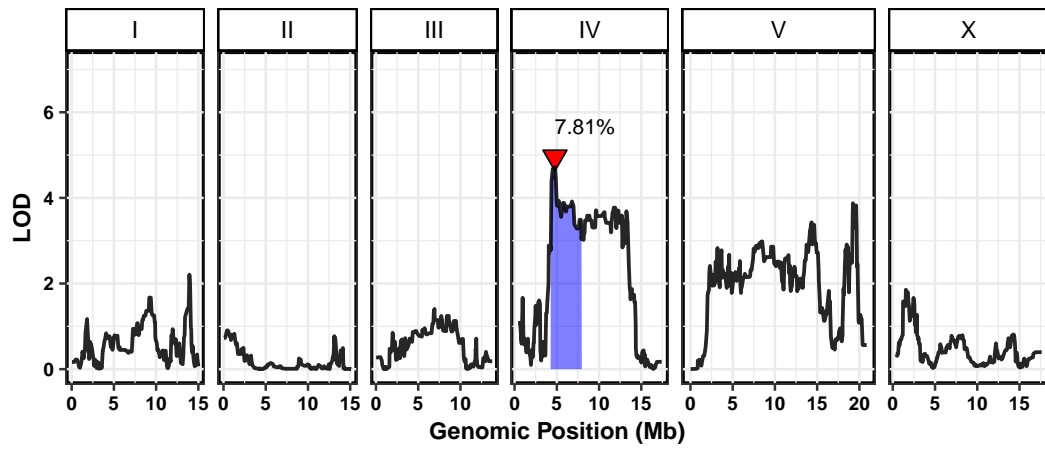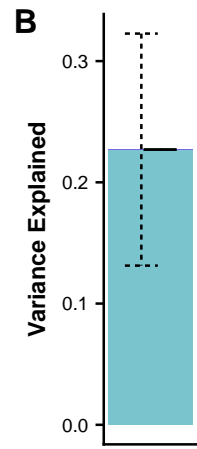

**C**

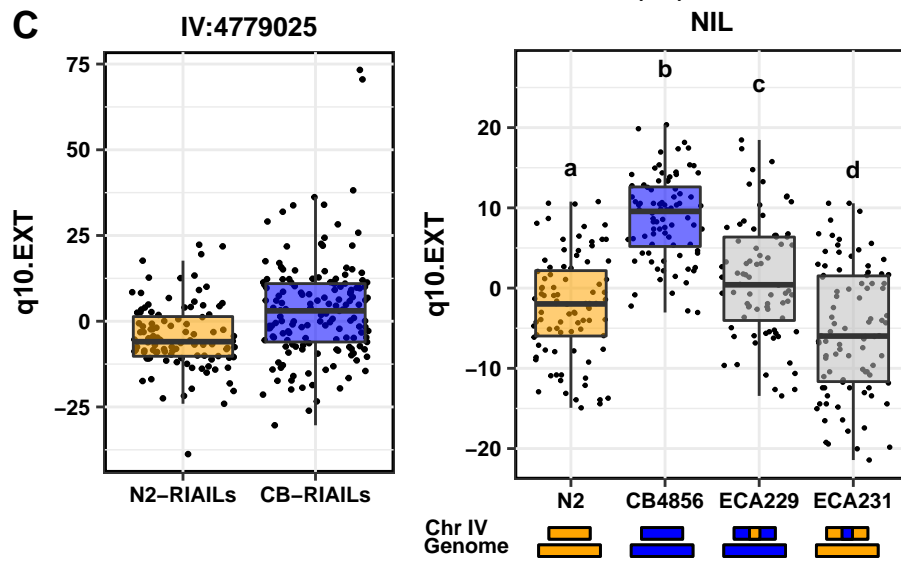



### A cisplatin.q10.norm.EXT

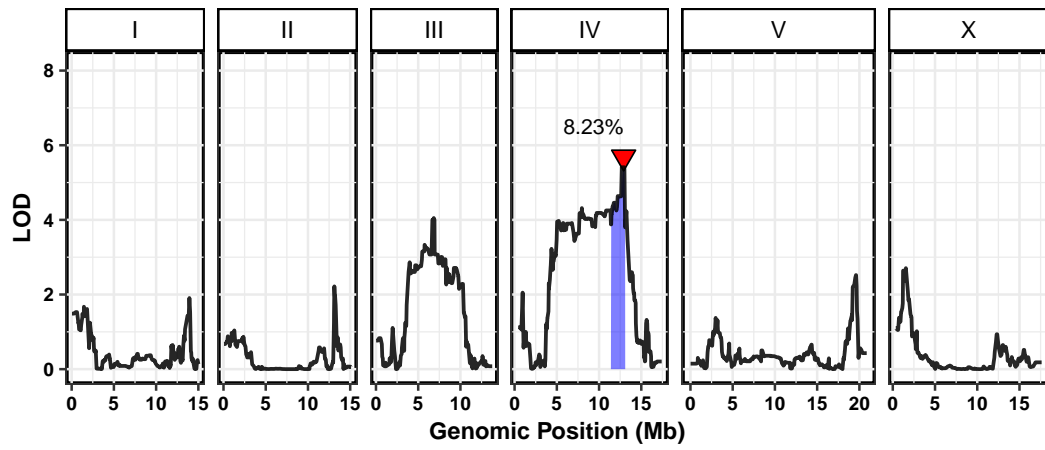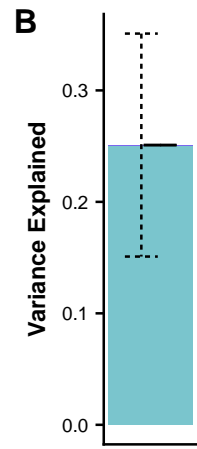

### C IV:12908590

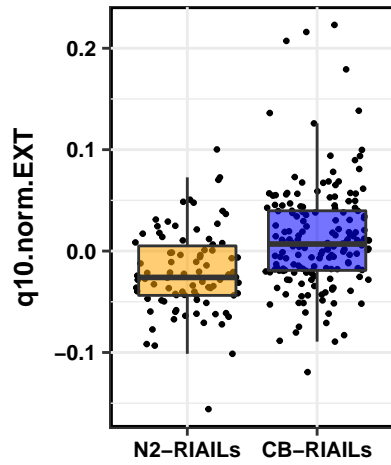

### A cisplatin.q10.TOF

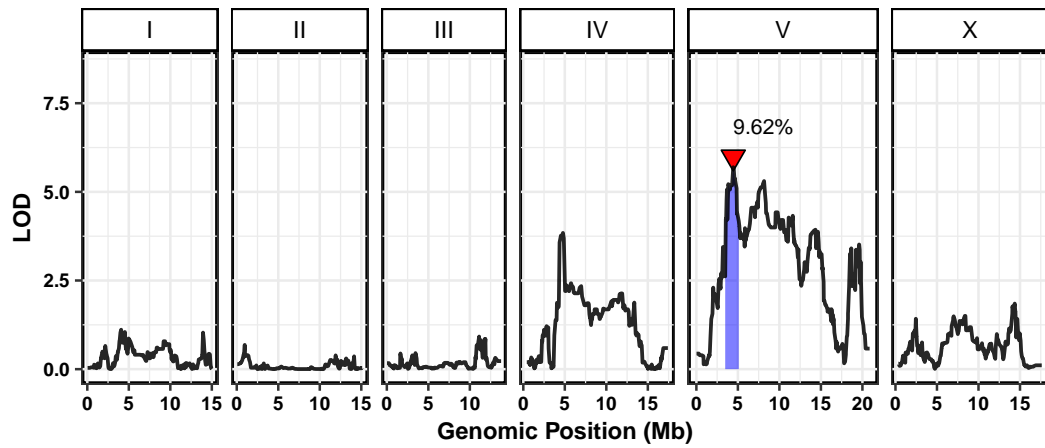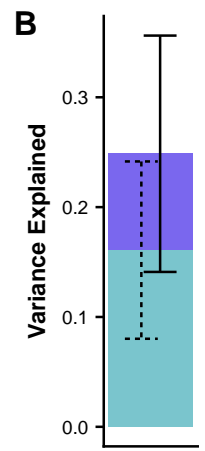

### C V:4442141

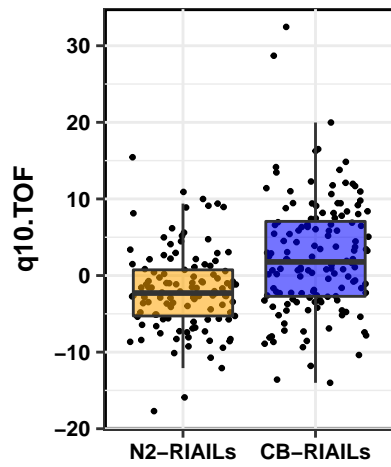

**A cisplatin.q25.EXT**

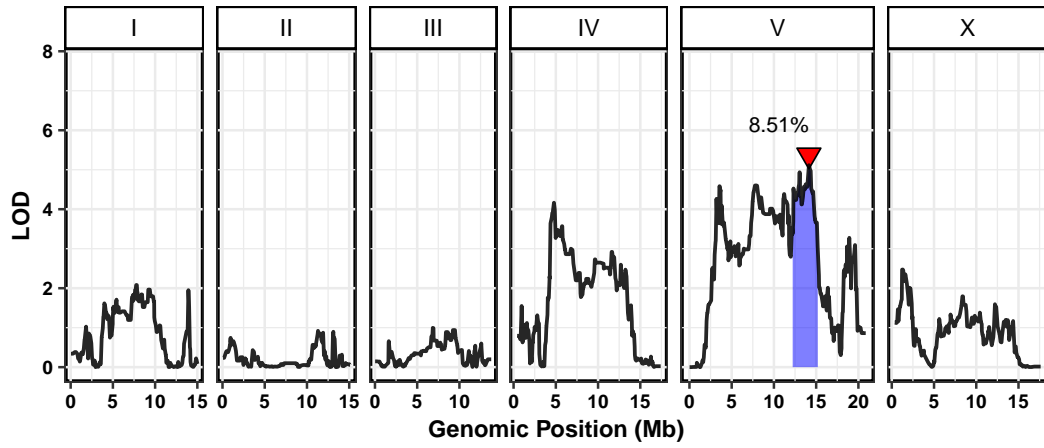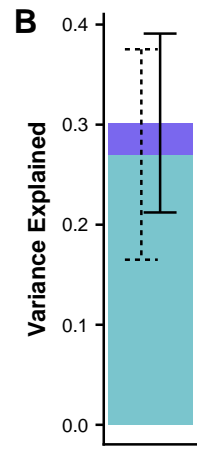

**C**

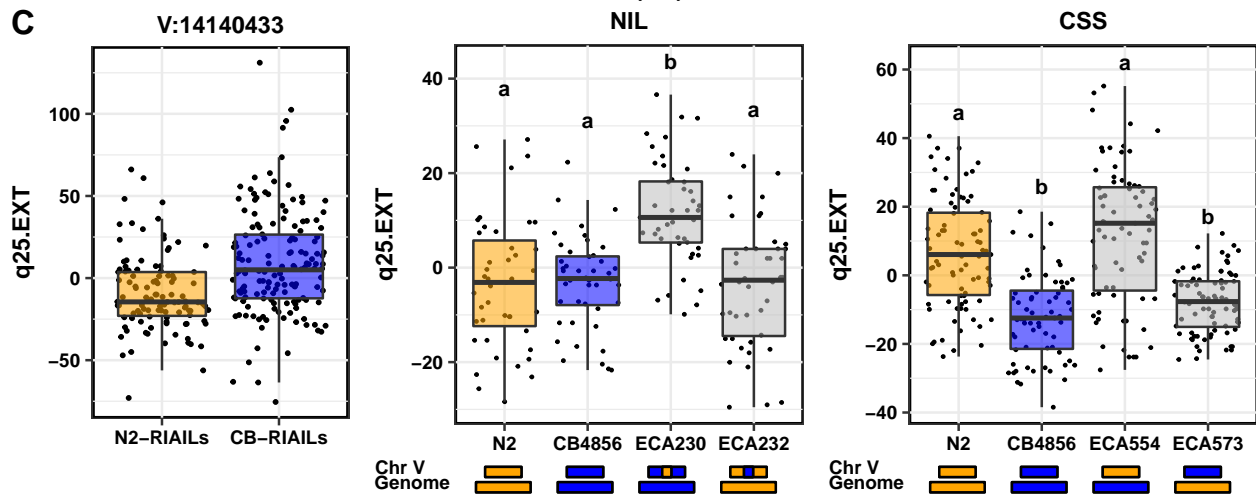

**A cisplatin.q25.norm.EXT**

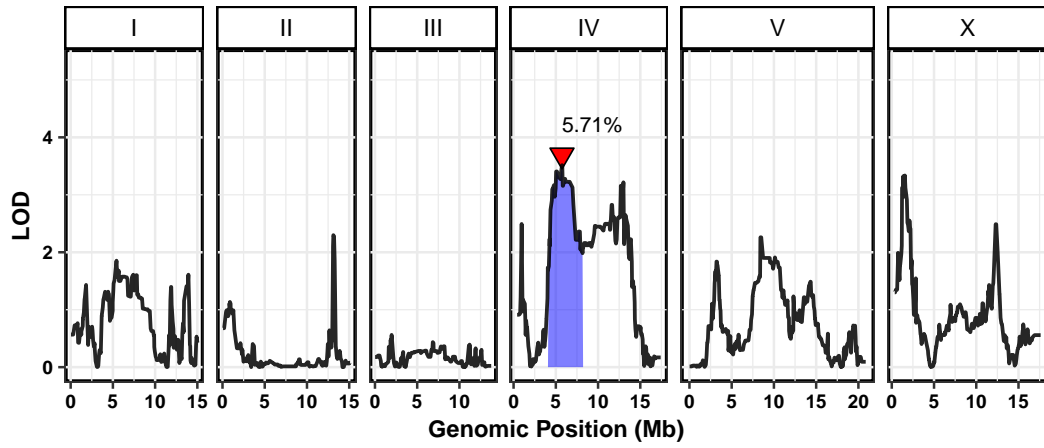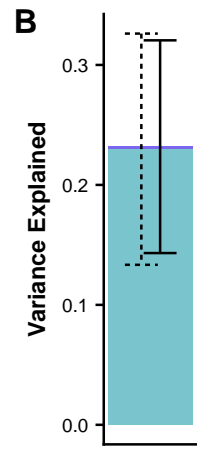

**C IV:5732338**

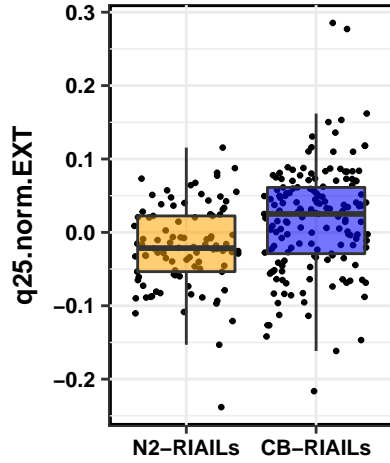

**NIL**

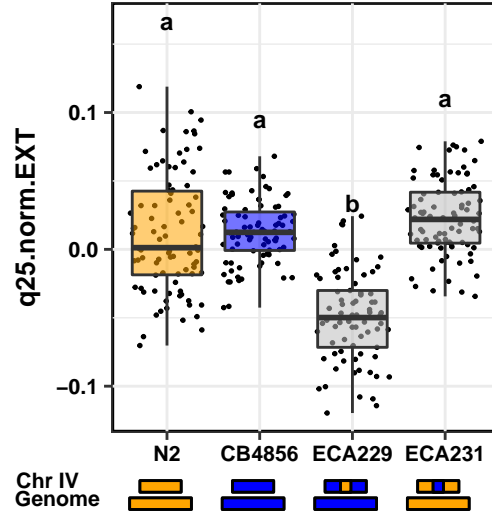

**A cisplatin.q25.TOF**

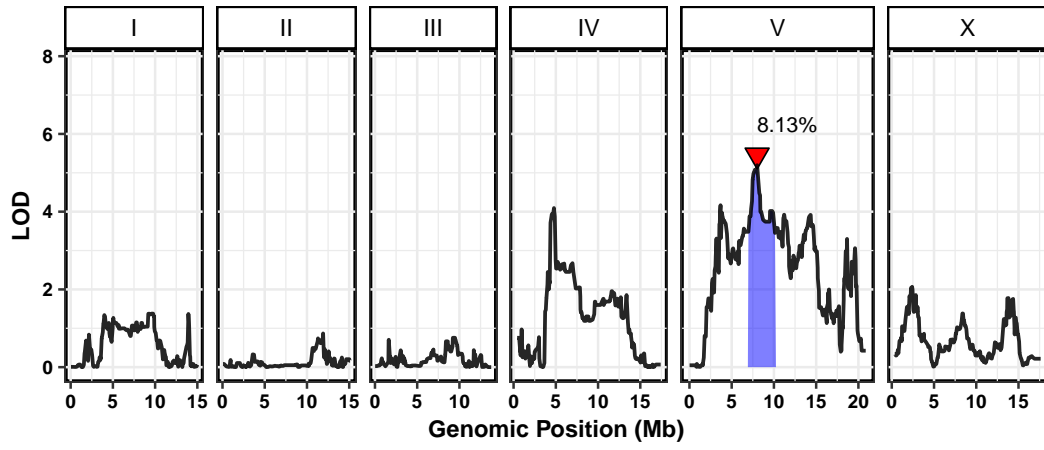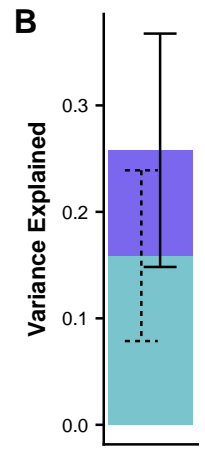

**C**

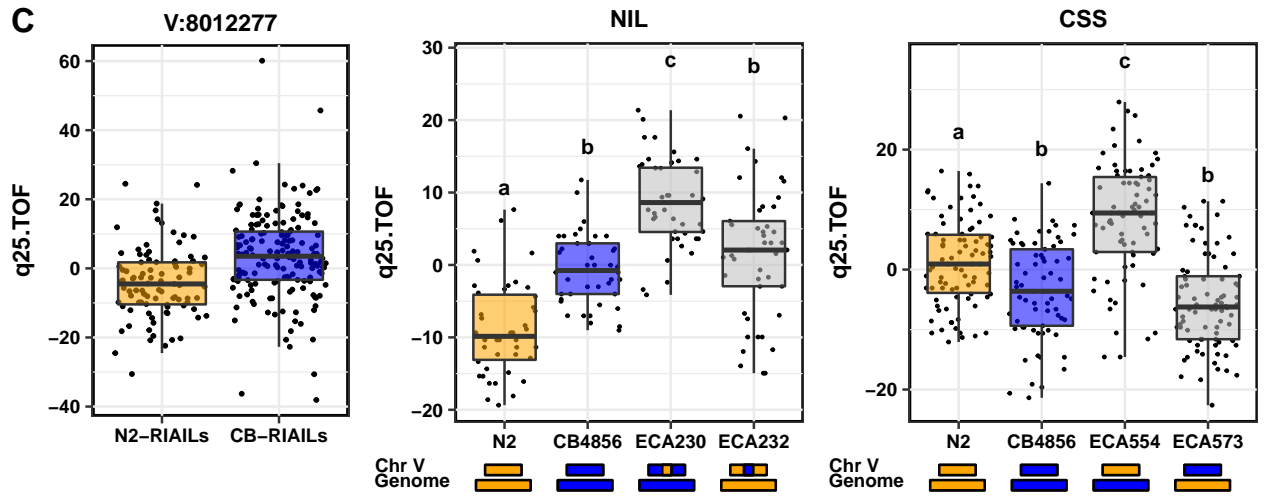

**A cisplatin.q75.EXT**

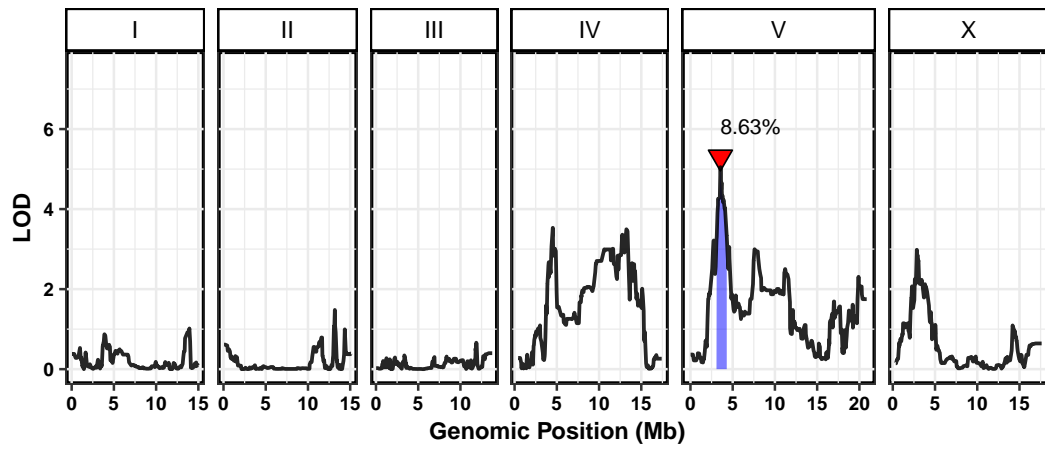

**B**

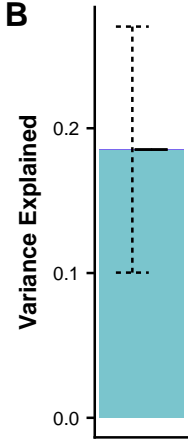

**C**

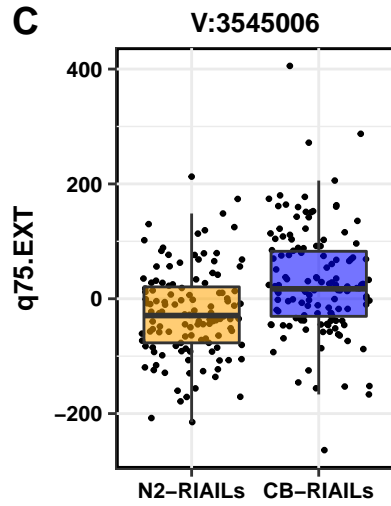

### A cisplatin.q75.norm.EXT

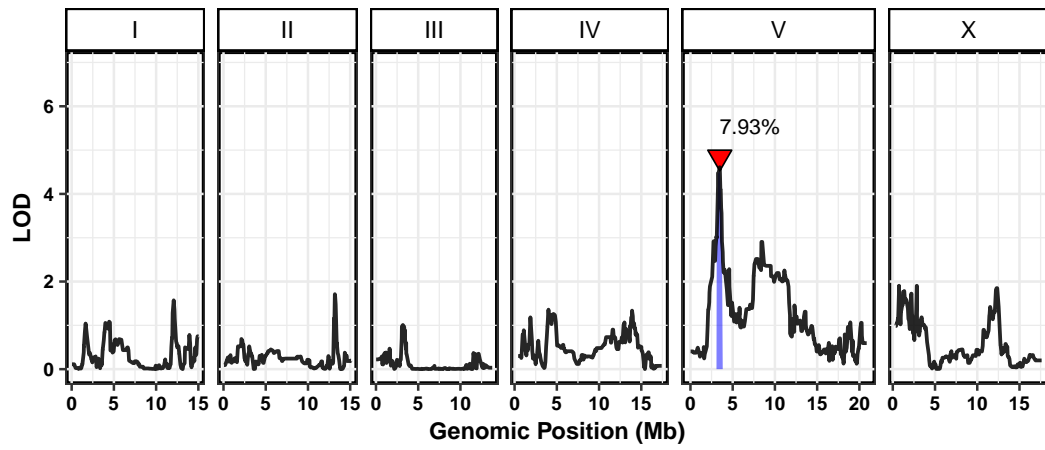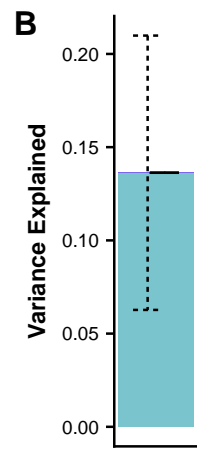

### C

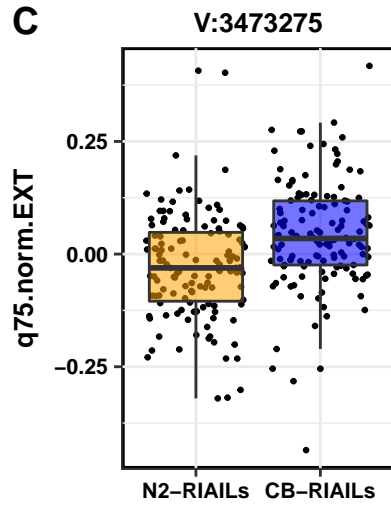

**A cisplatin.q75.TOF**

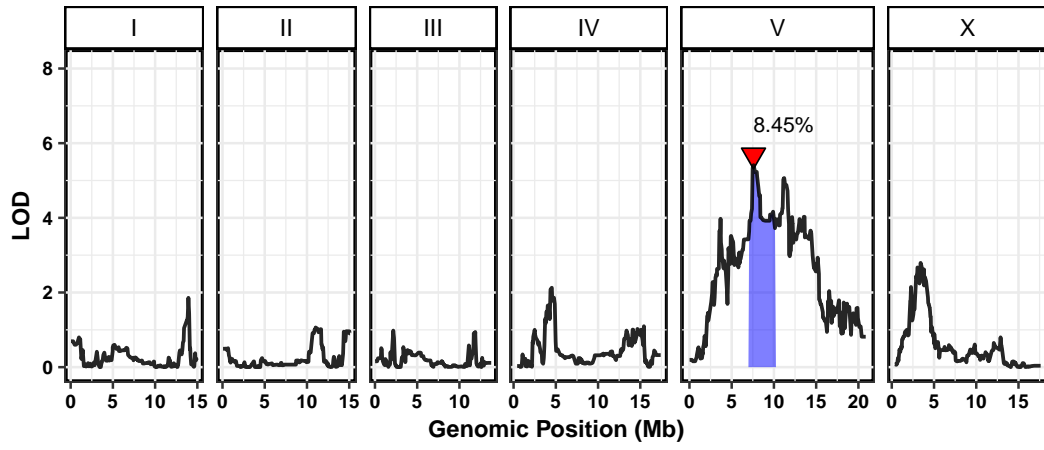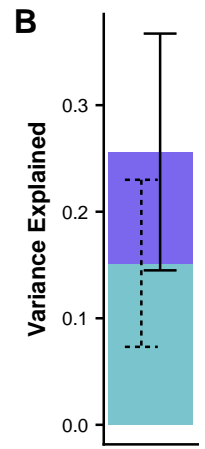

**C**

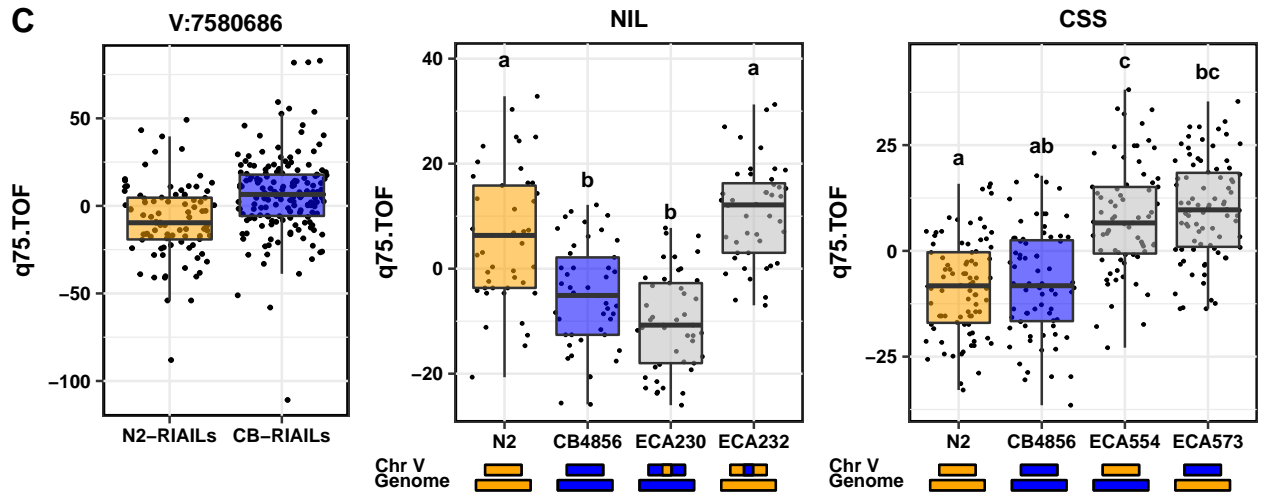



**A cisplatin.q90.EXT**

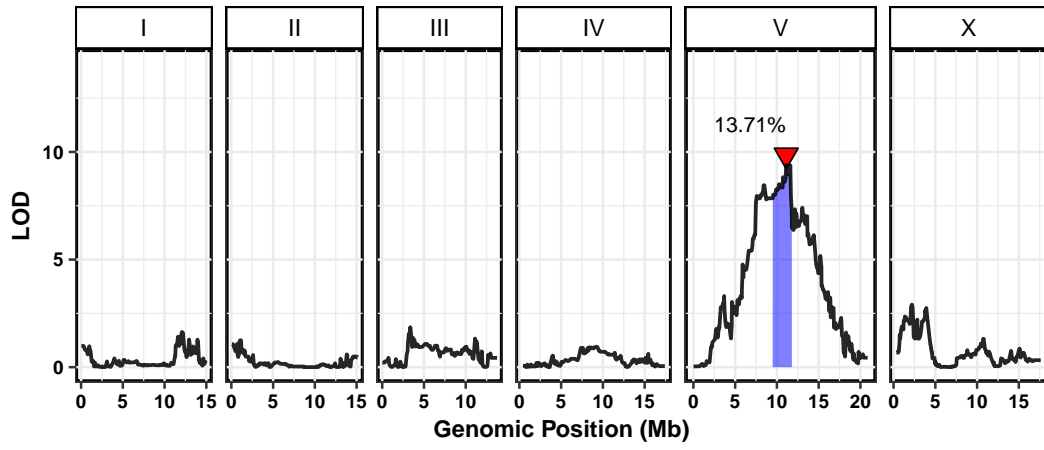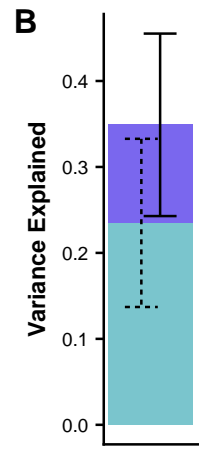

**C**

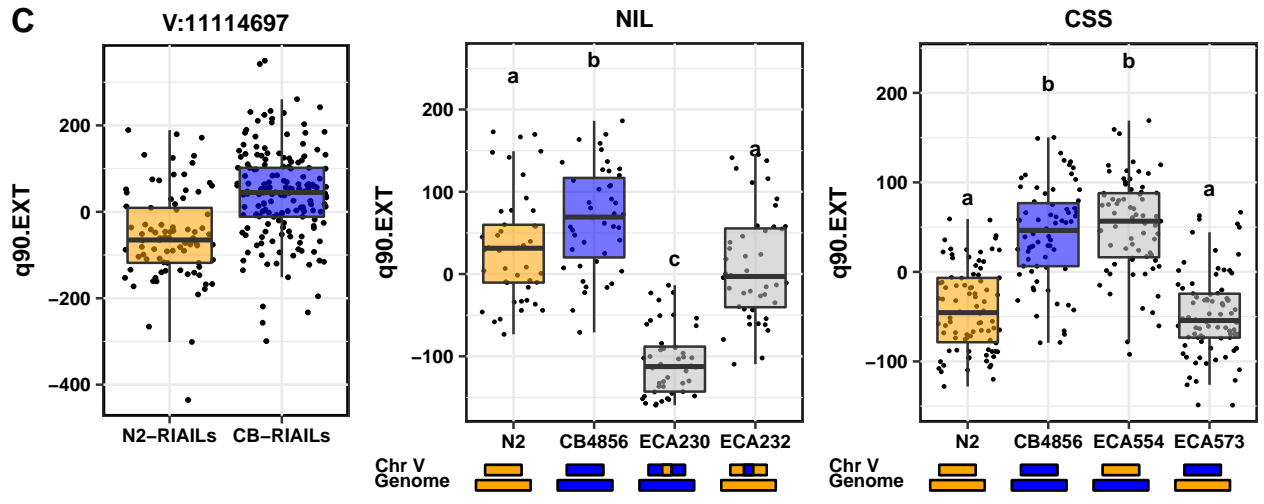

**A cisplatin.q90.TOF**

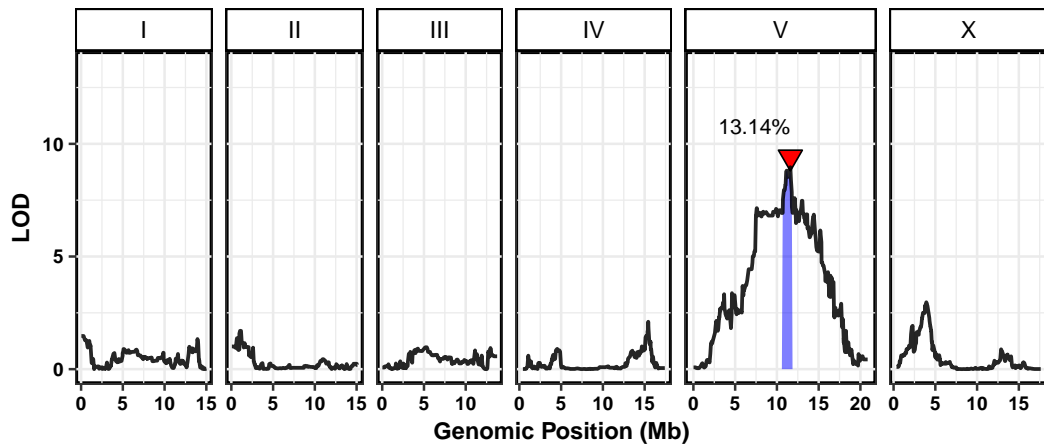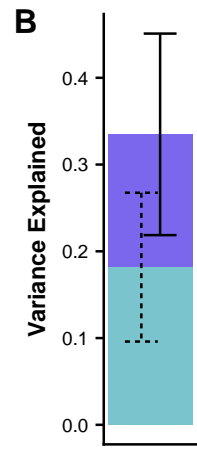

**C**

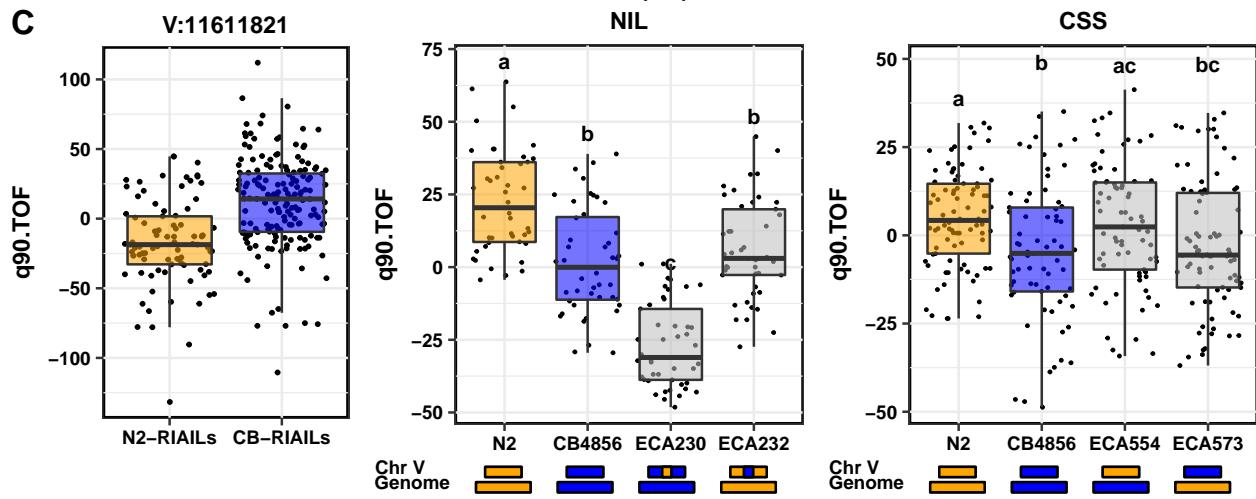

### A cisplatin.var.EXT

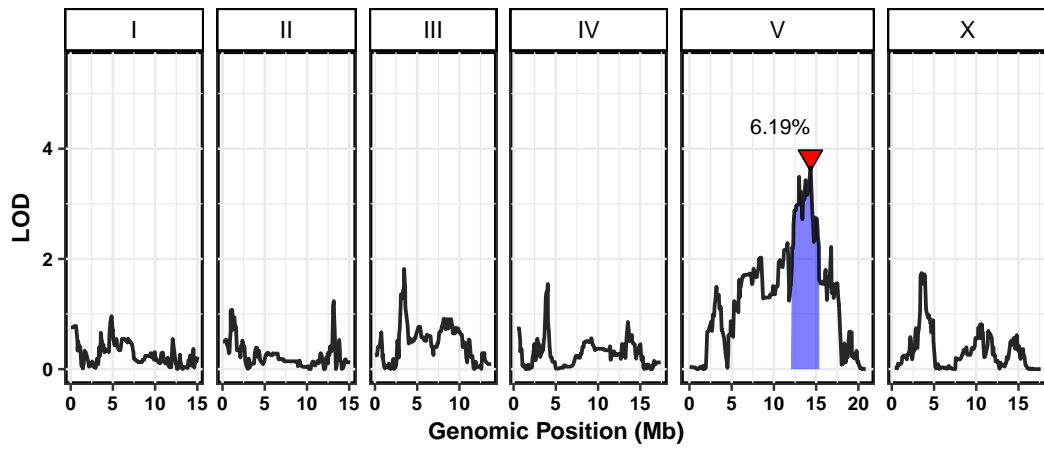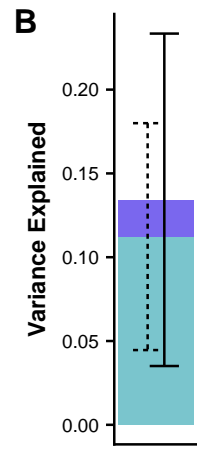

### C V:14322724

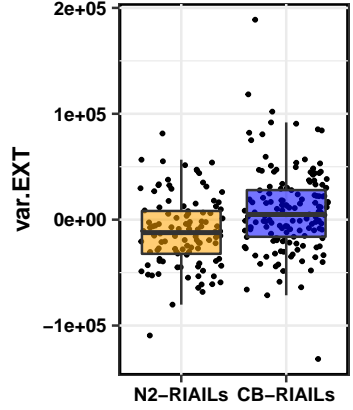

### NIL

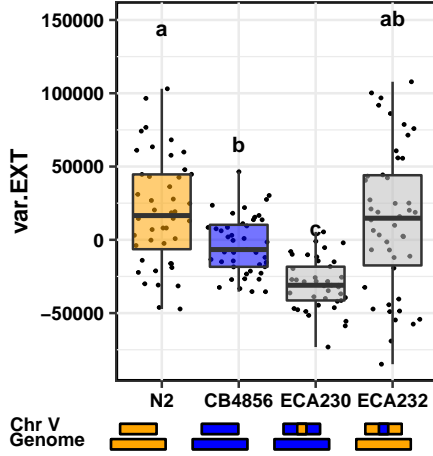

### CSS

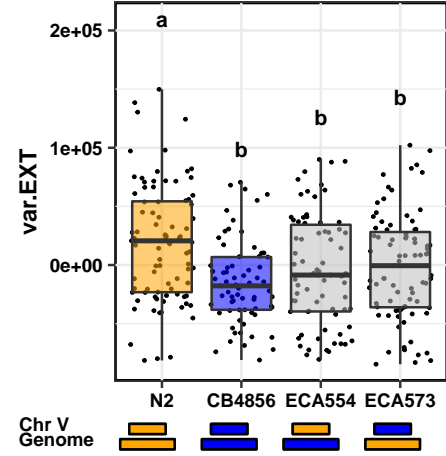

**A cisplatin.var.TOF**

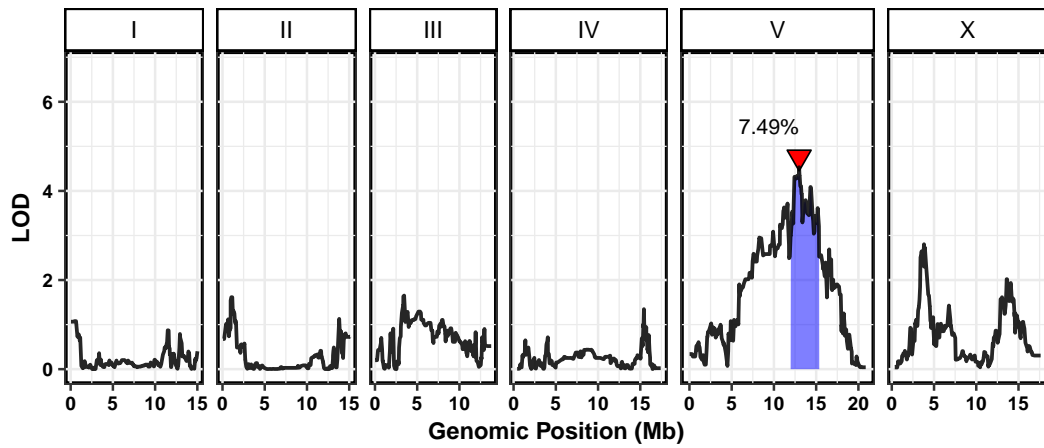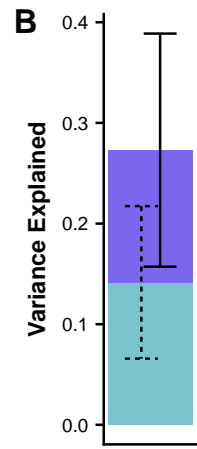

**C**

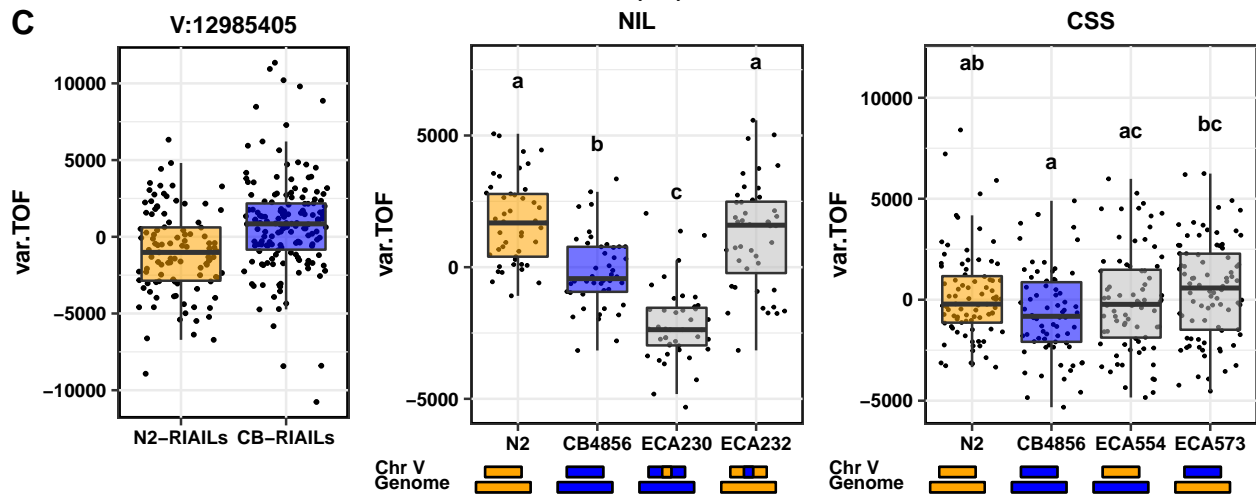

### A copper.cv.EXT

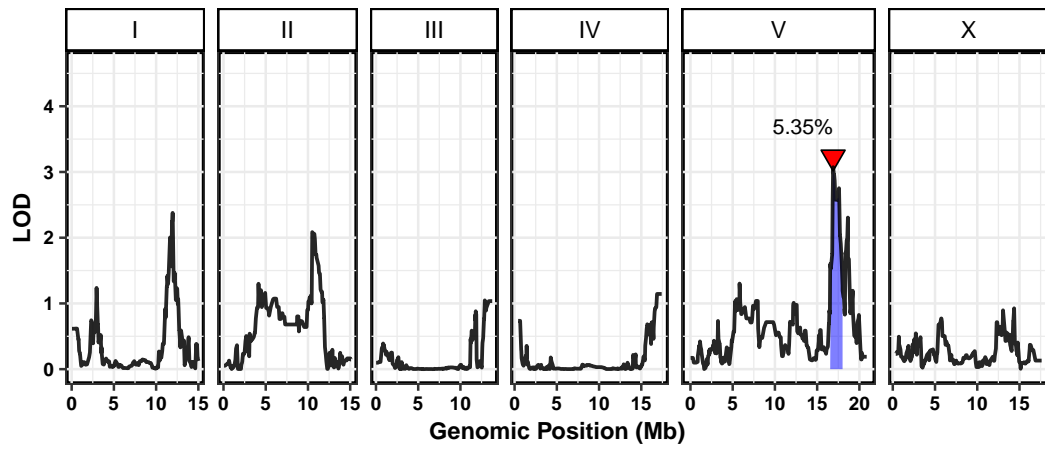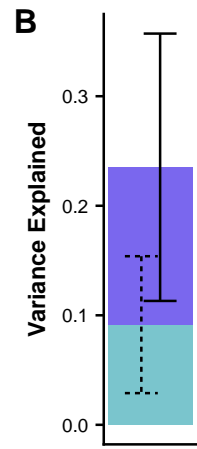

### C V:16888417

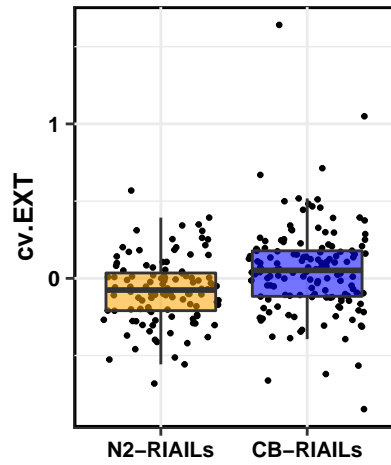

**A** copper.cv.TOF

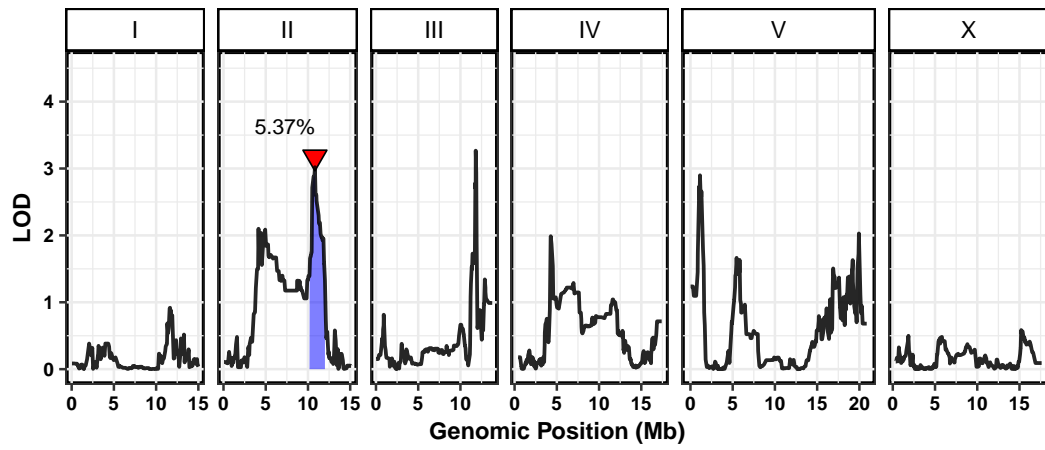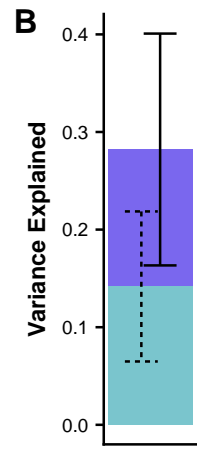

**C**

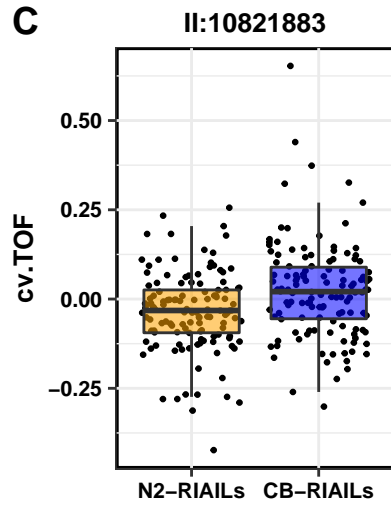

### A copper.median.EXT

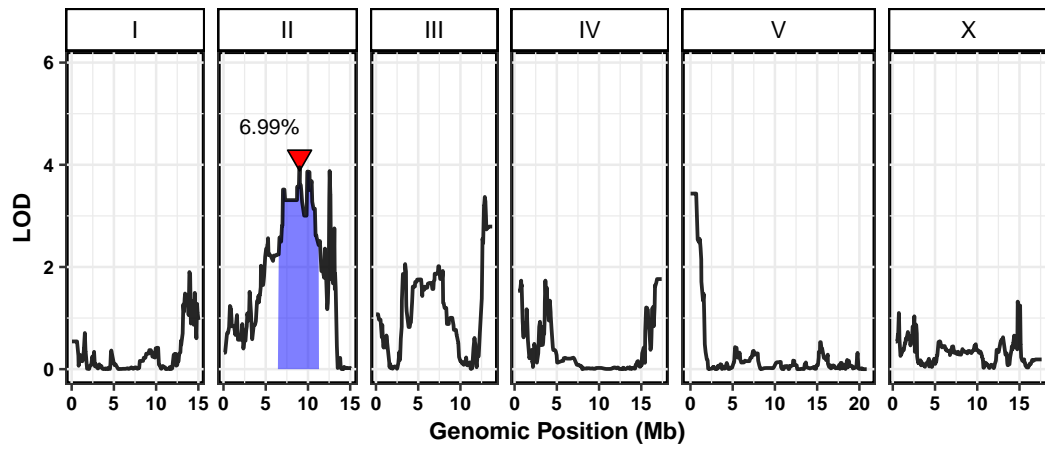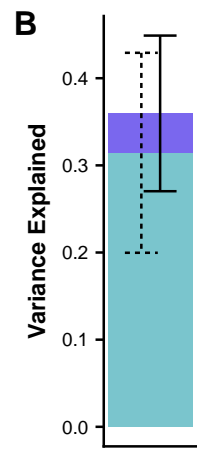

### C

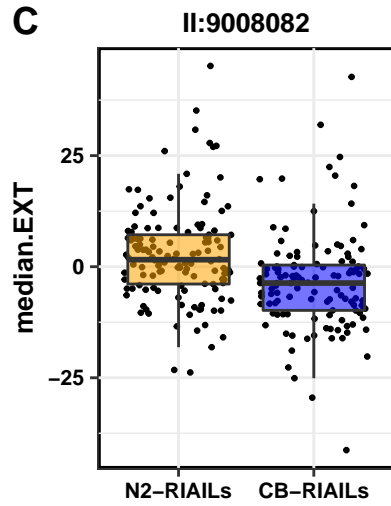

### A copper.median.TOF

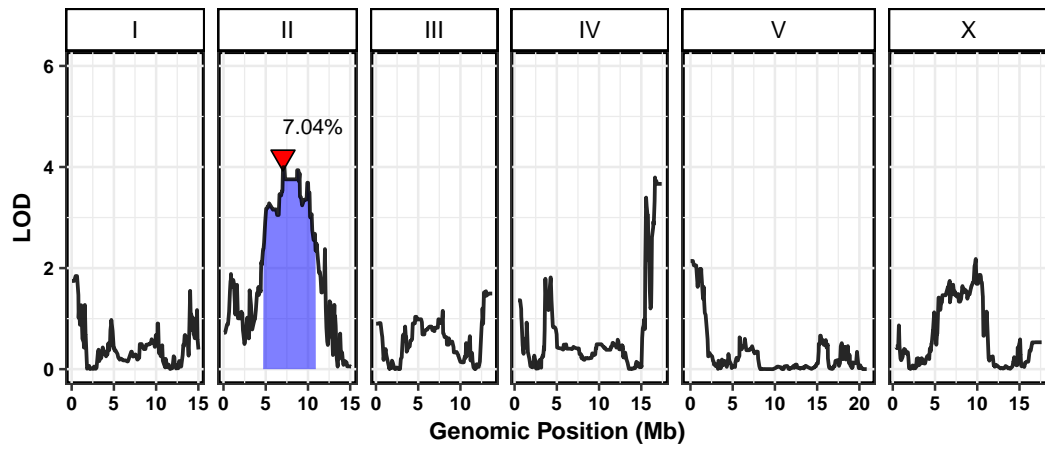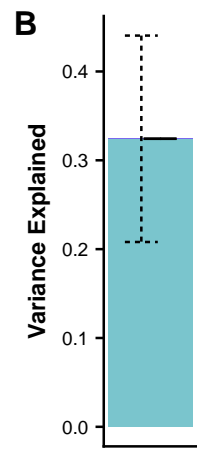

### C II:7041451

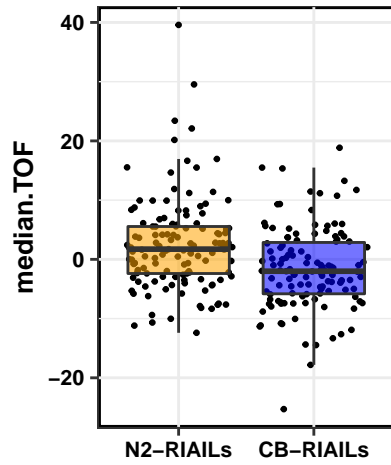



**A** copper.n

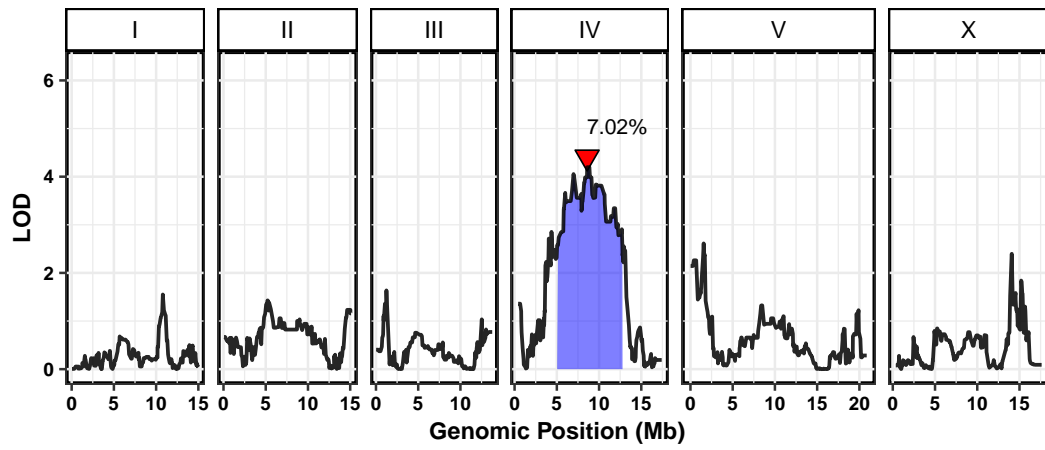

**B**

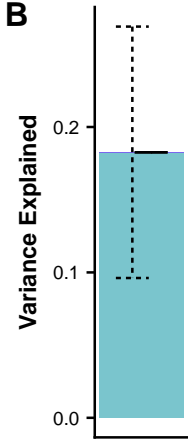

**C**

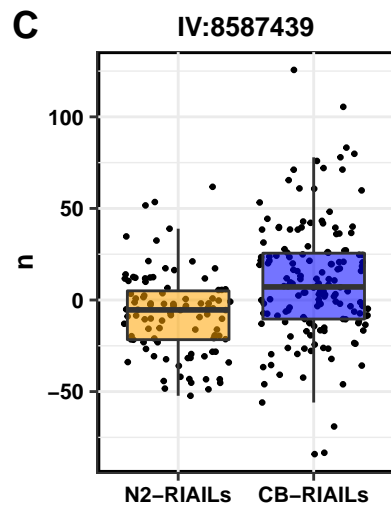

**A** copper.norm.n

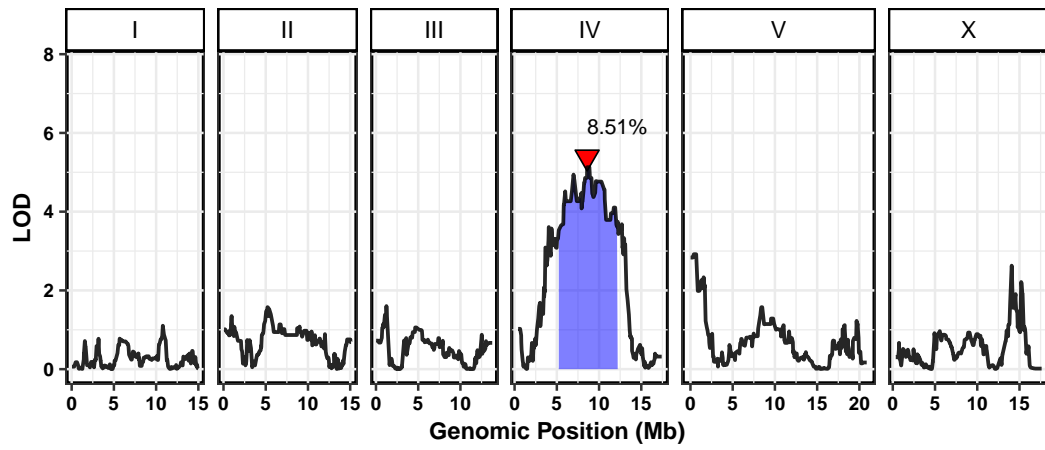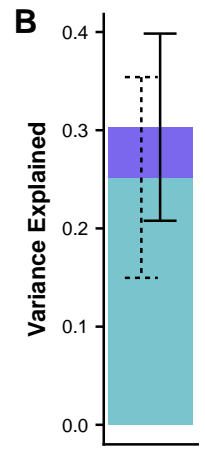

**C** IV:8587439

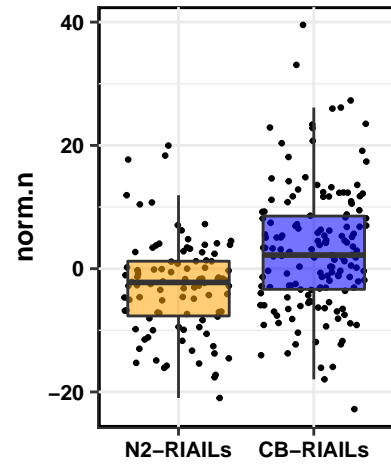

### A copper.q10.EXT

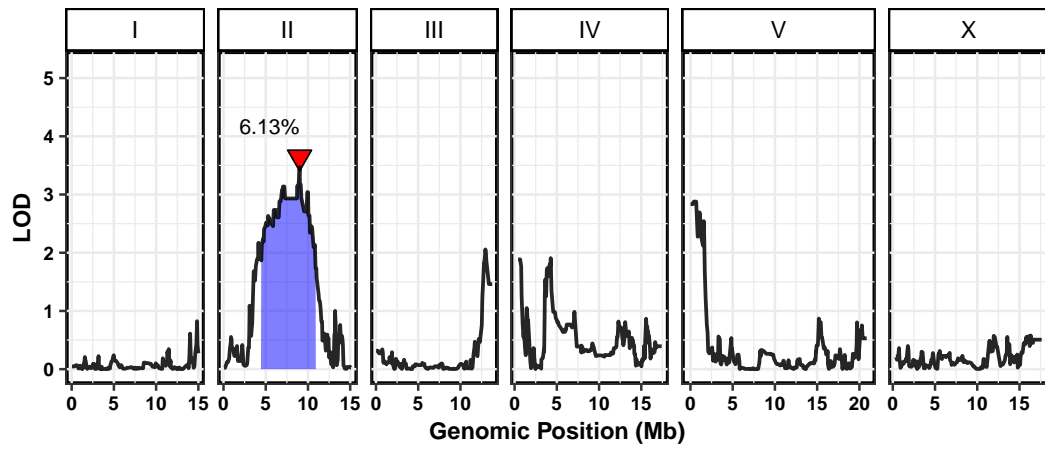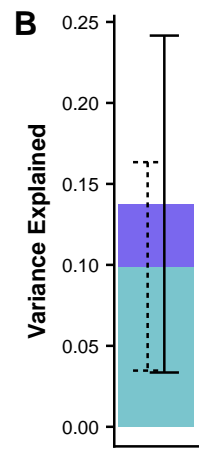

### C II:9008082

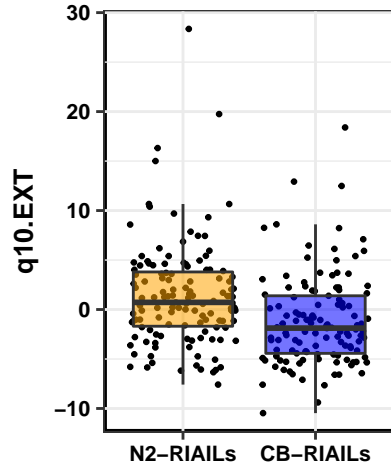

### A copper.q10.norm.EXT

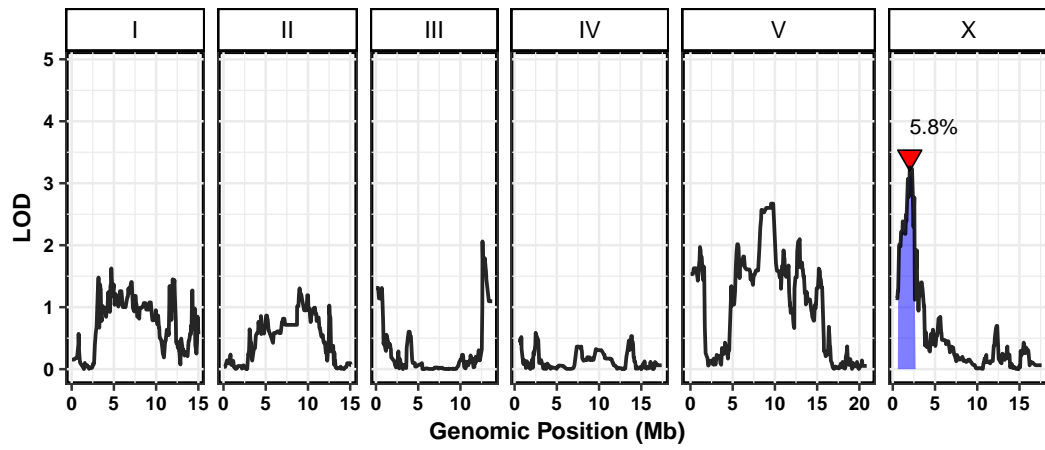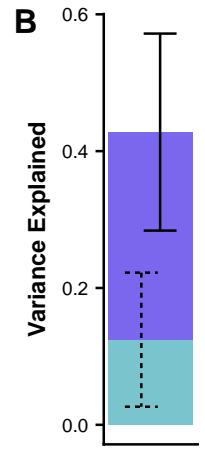

### C X:2013375

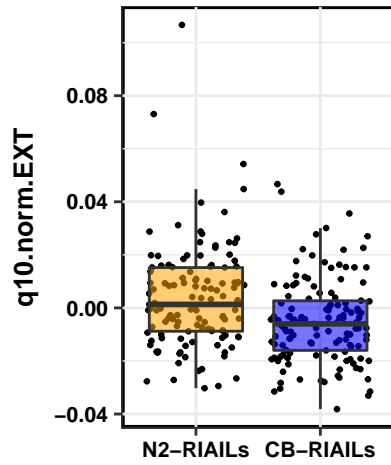

**A** copper.q10.TOF

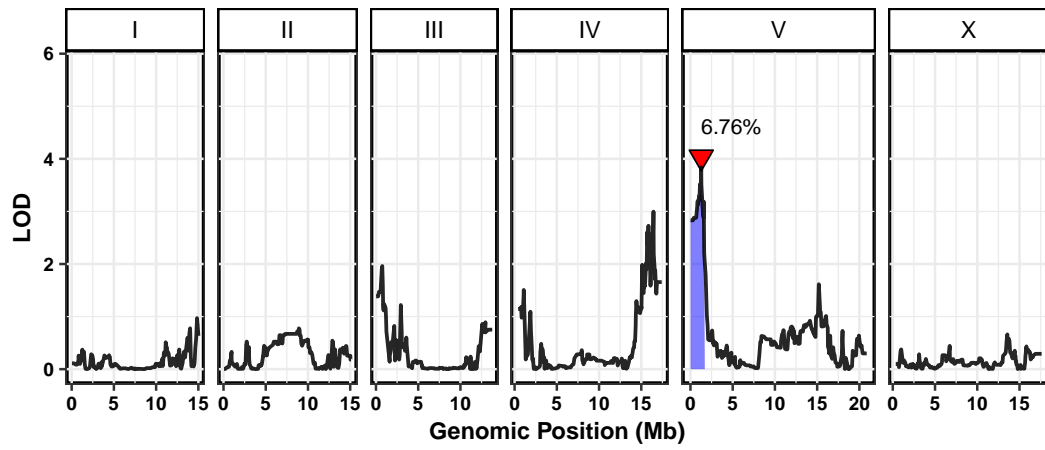

**B**

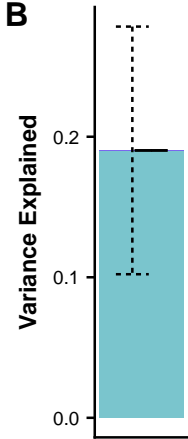

**C**

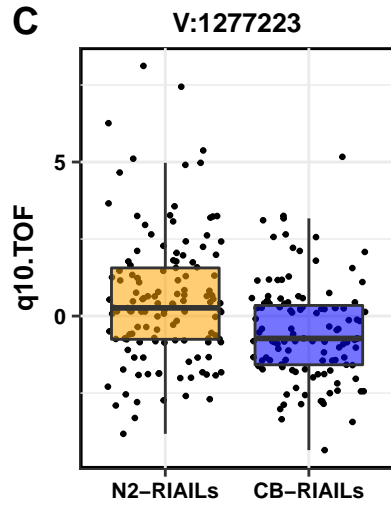

**A** copper.q25.EXT

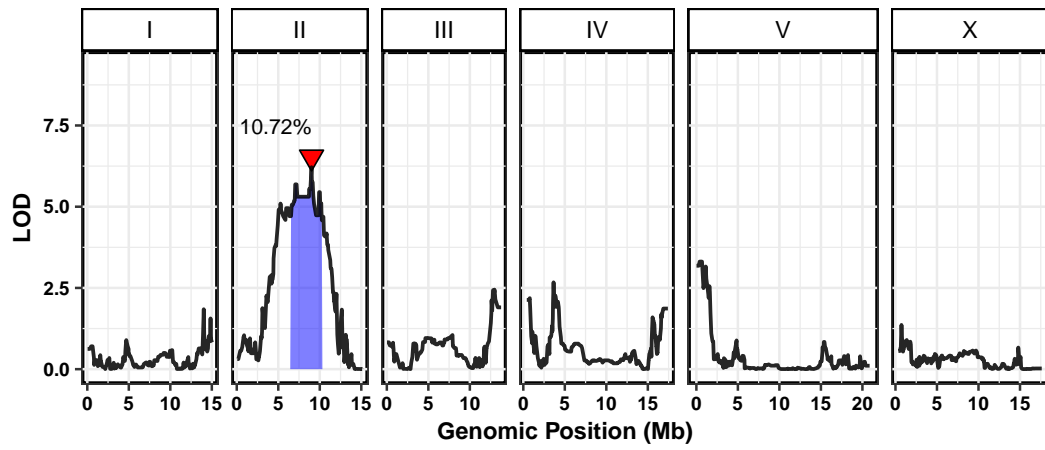

**B**

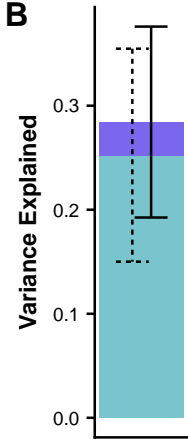

**C**

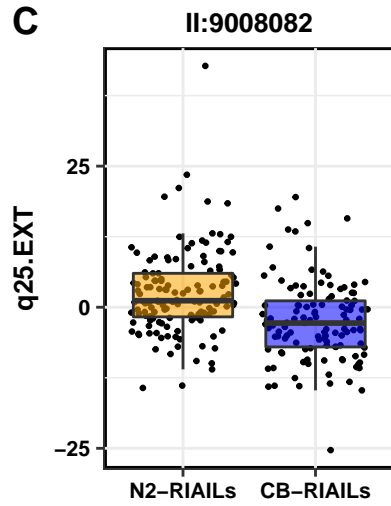

### A copper.q25.TOF

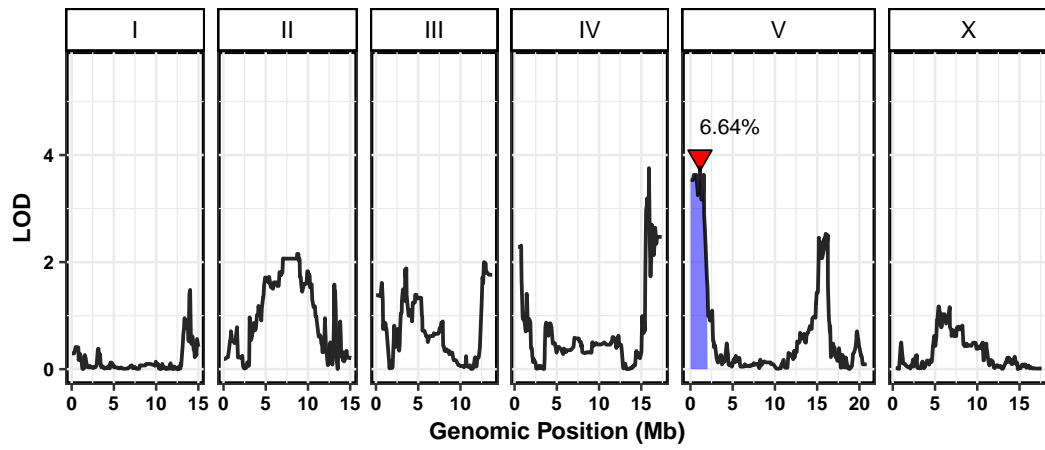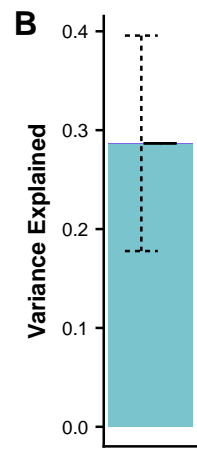

### C

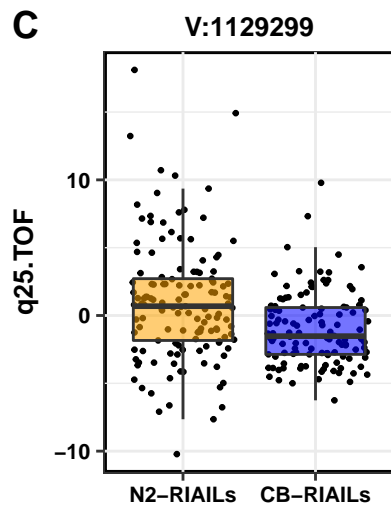

### A copper.q75.TOF

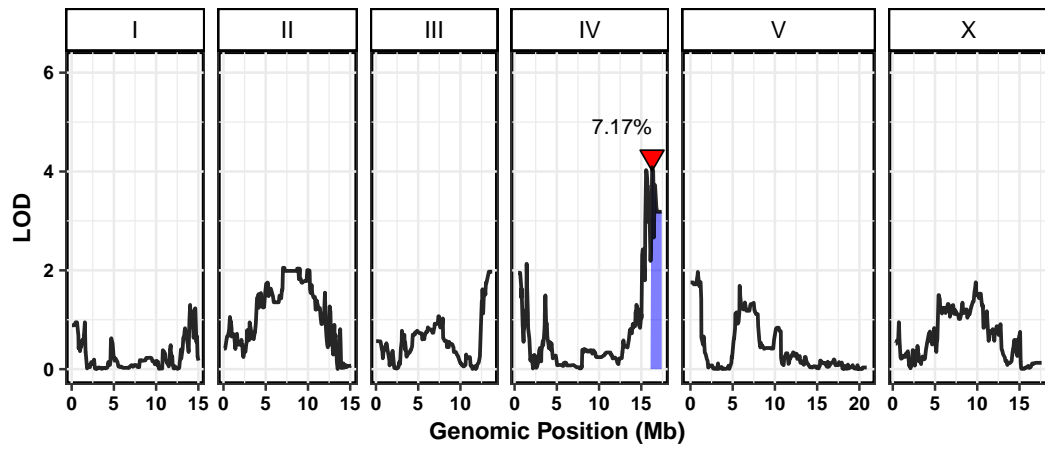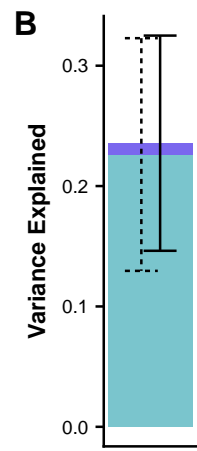

### C IV:16277985

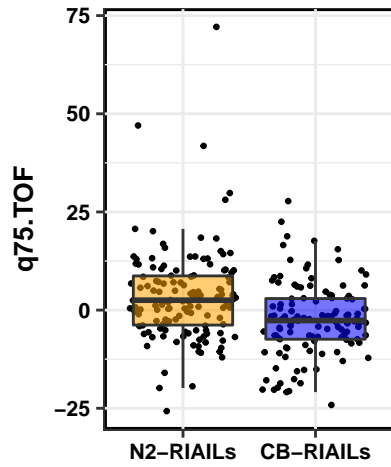



### A diquat.mean.norm.EXT

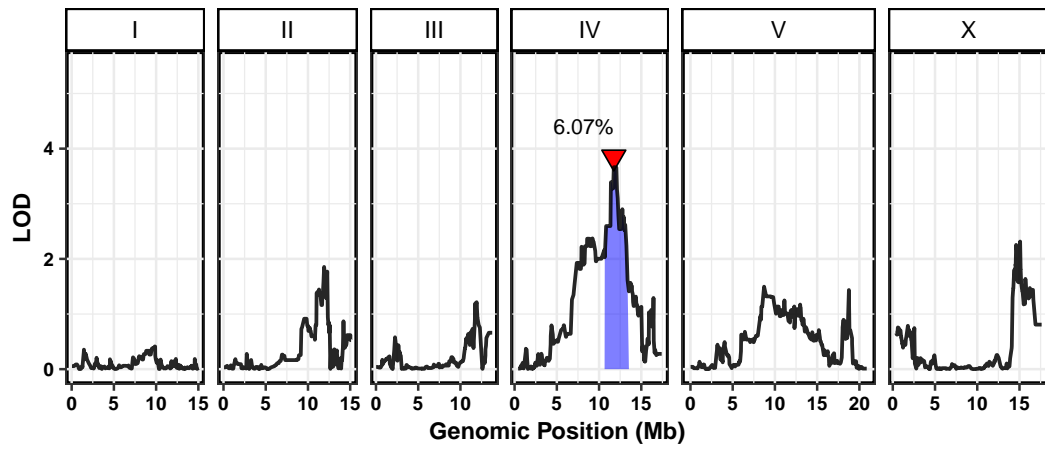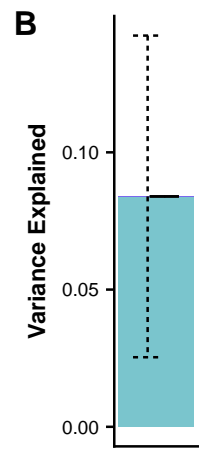

### C

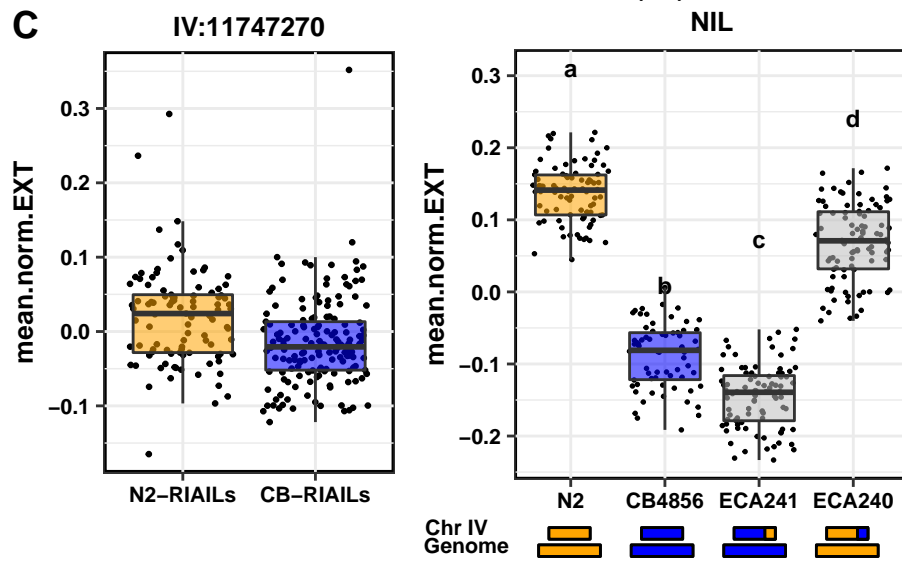

### A diquat.mean.TOF

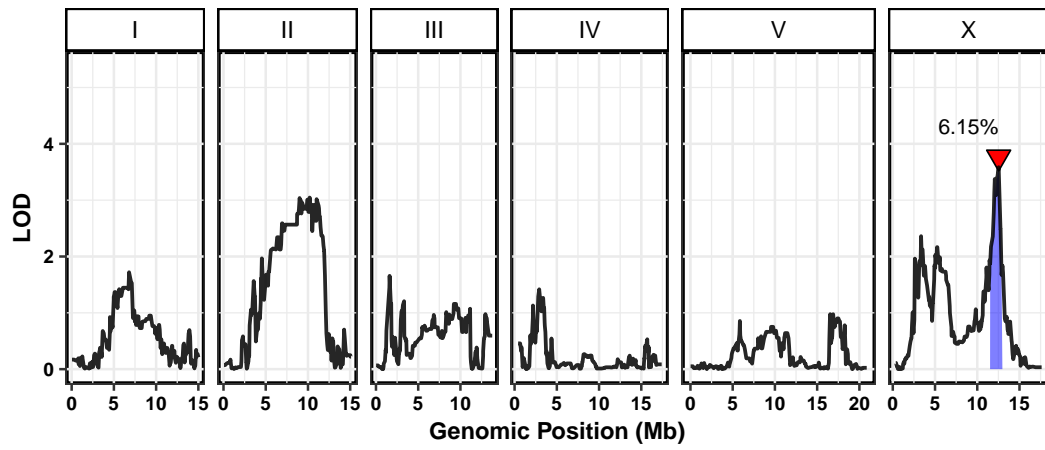

### B

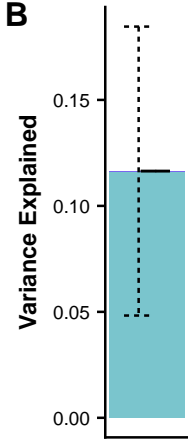

### C

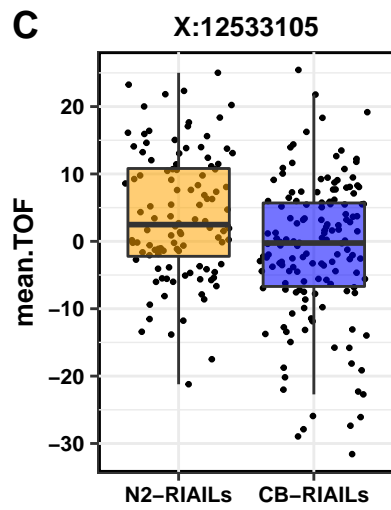

**A diquat.median.norm.EXT**

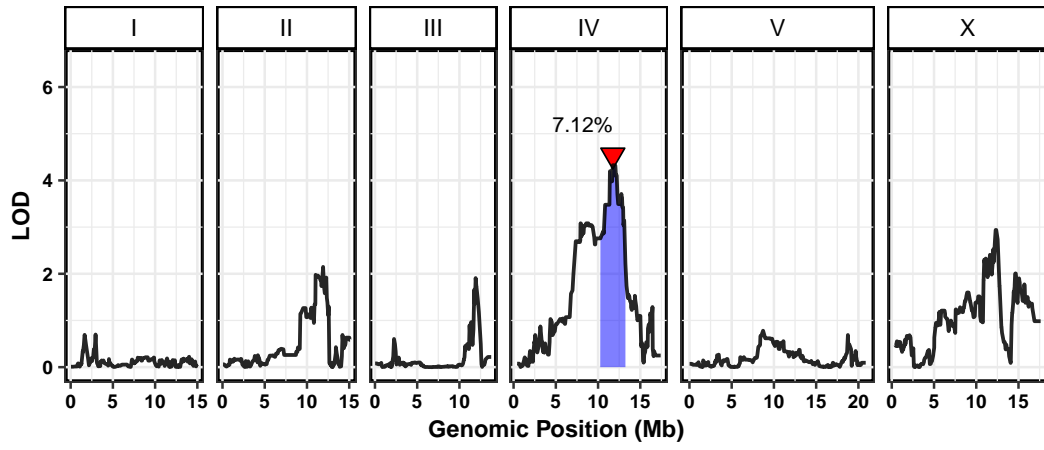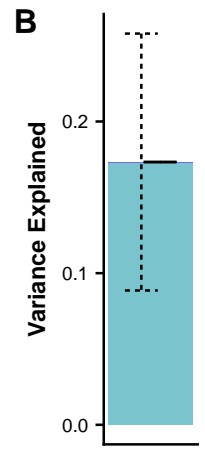

**C IV:11747270**

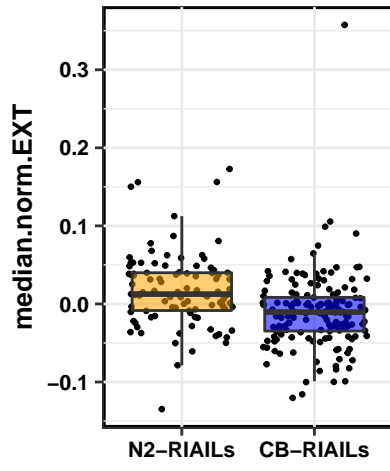

**NIL**

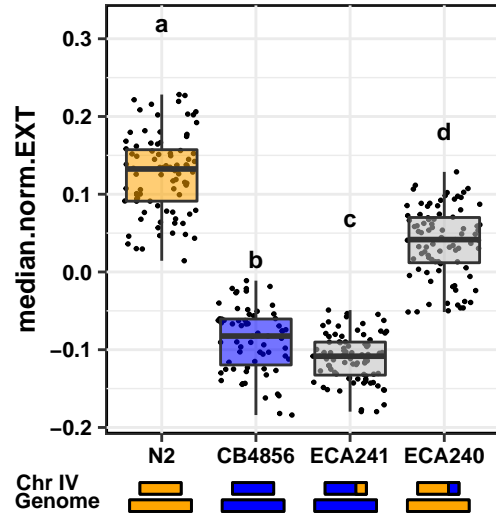

### A diquat.median.TOF

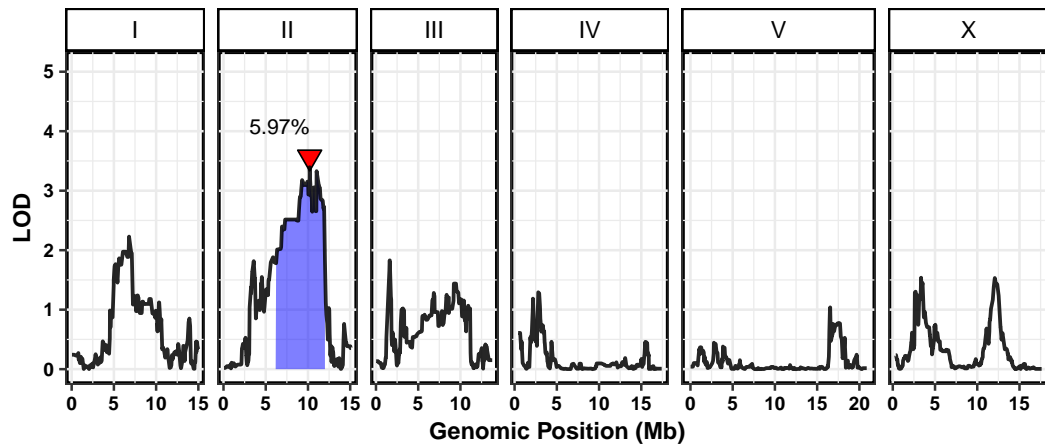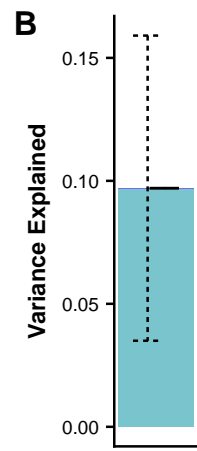

### C II:10201103

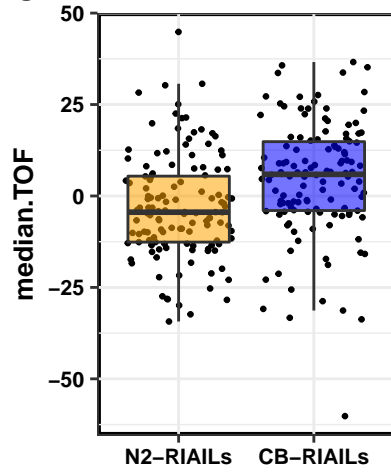

### A diquat.q10.EXT

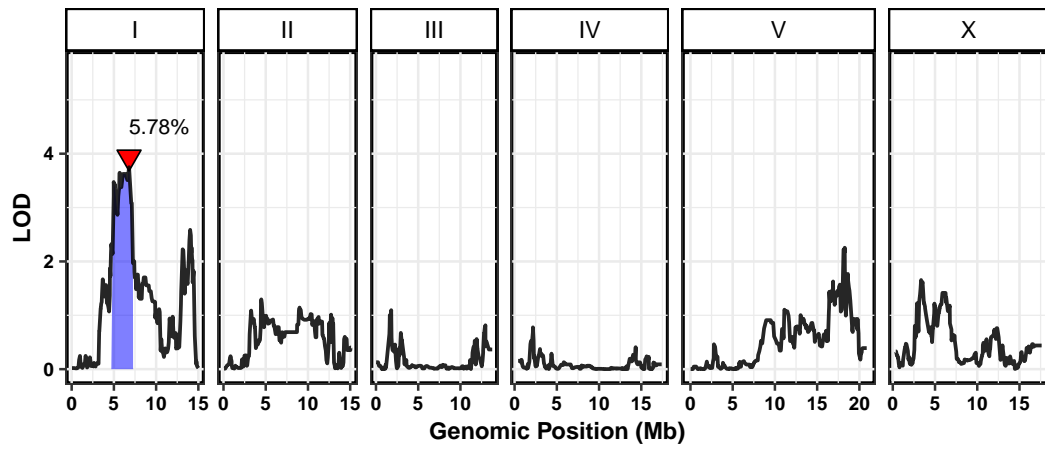

### B

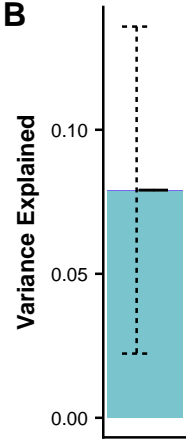

### C

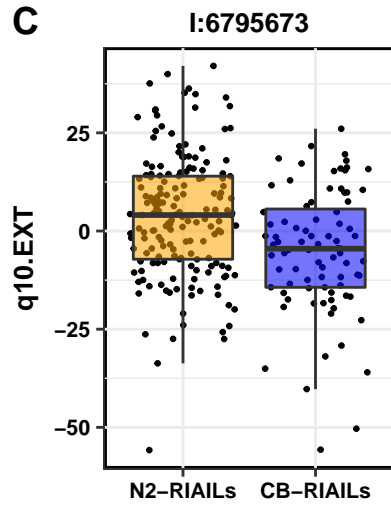

### A diquat.q10.TOF

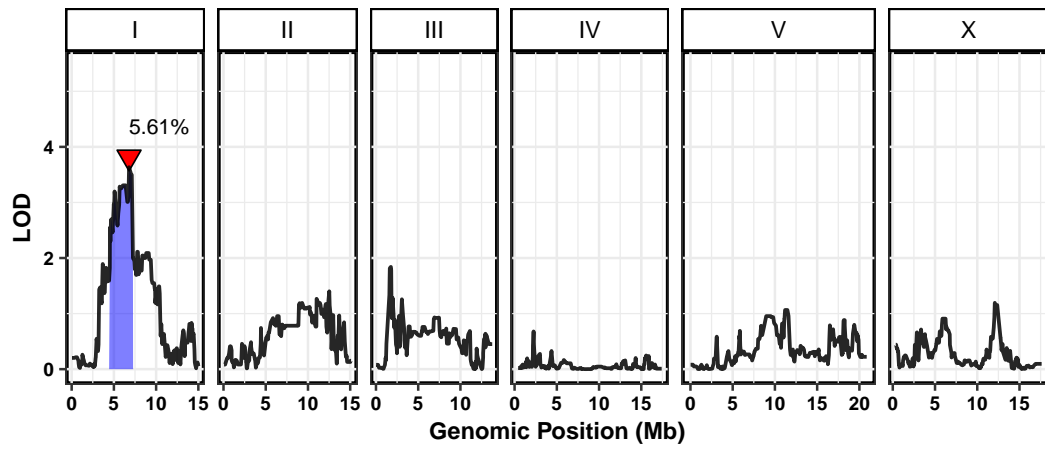

### B

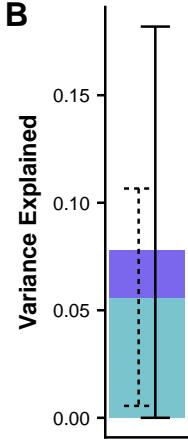

### C

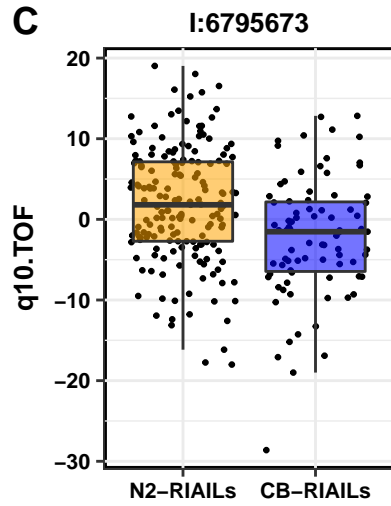

### A diquat.q25.EXT

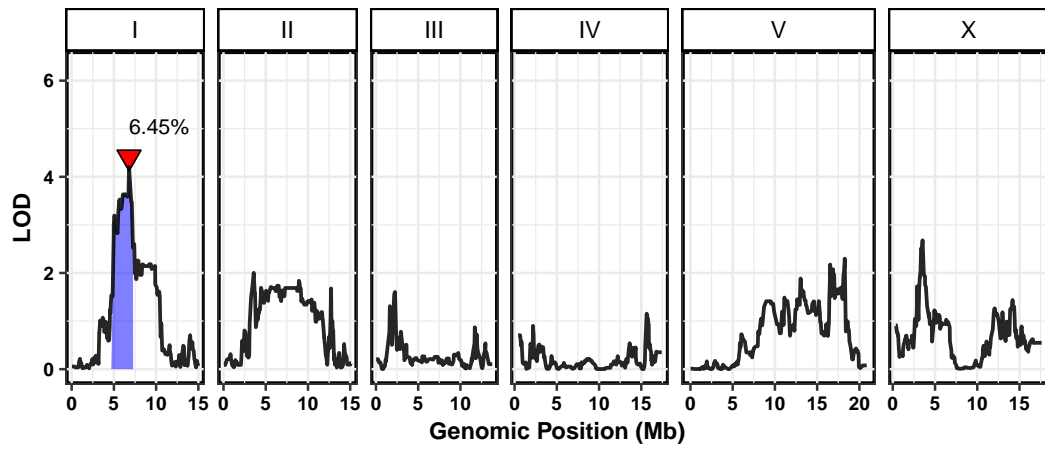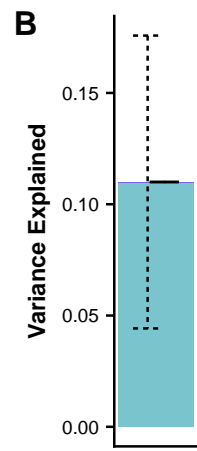

### C I:6795673

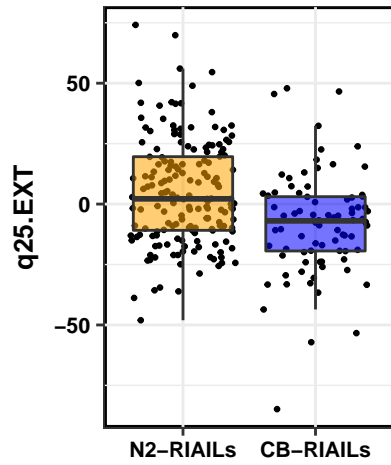

### A diquat.q75.EXT

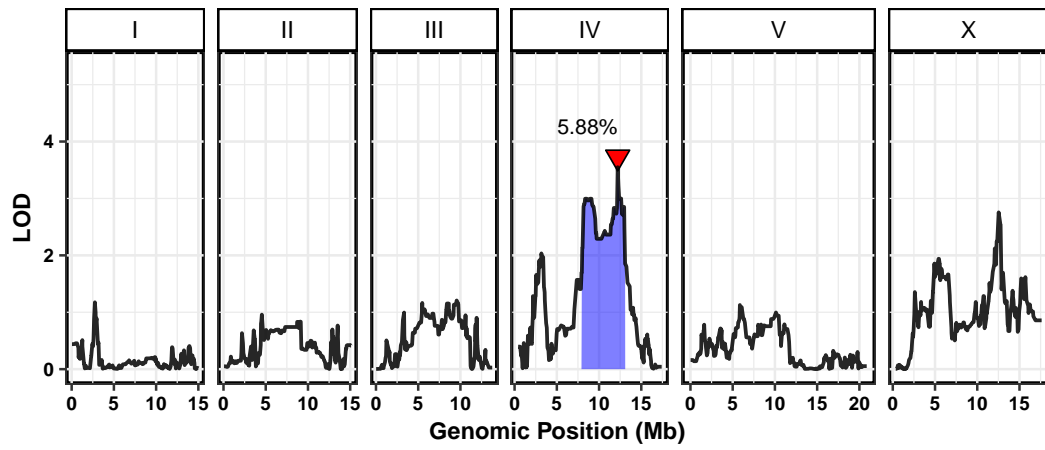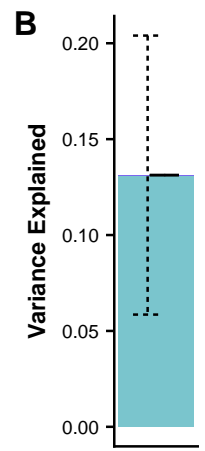

### C IV:12207650

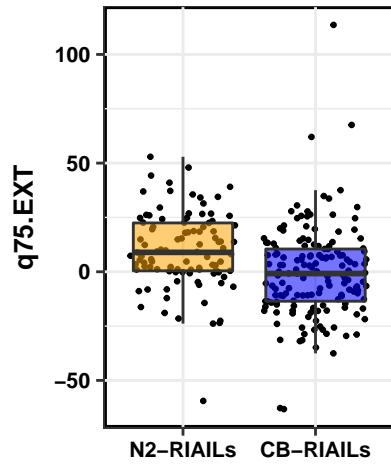



### A diquat.q75.norm.EXT

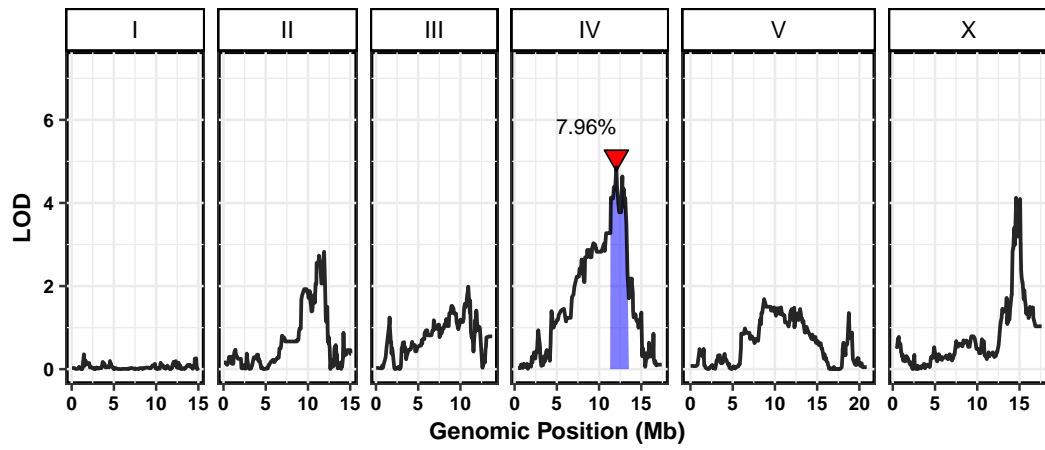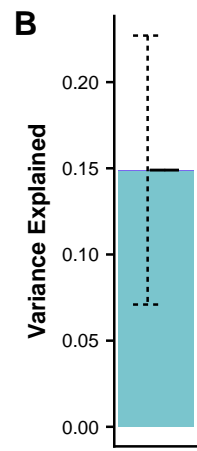

### C

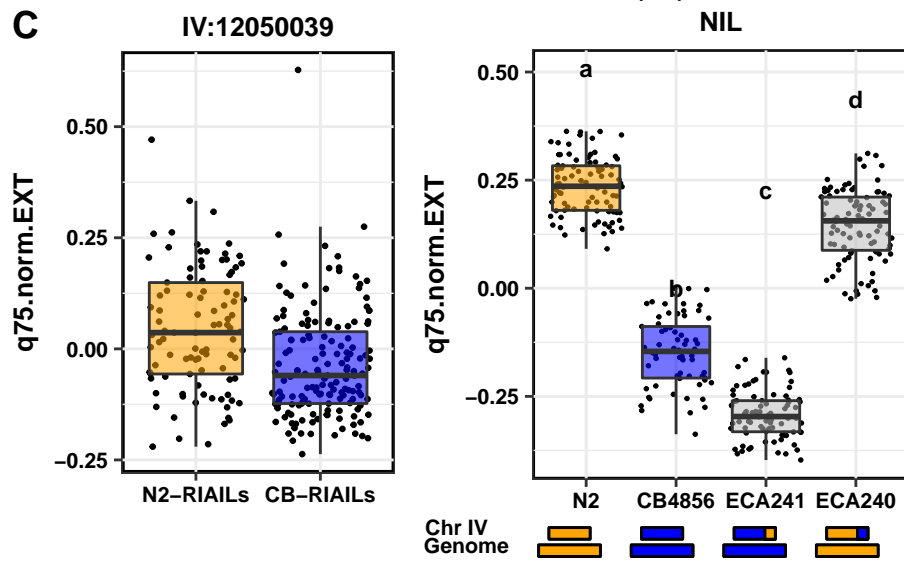

**A** diquat.q75.TOF

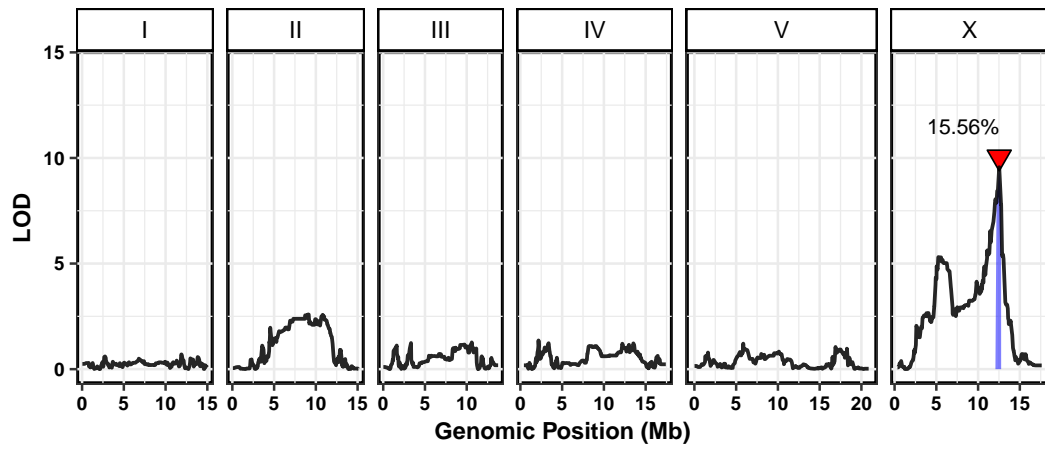

**B**

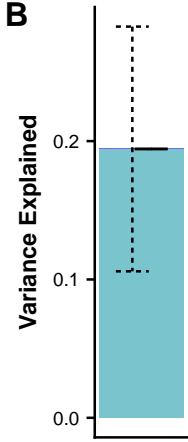

**C**

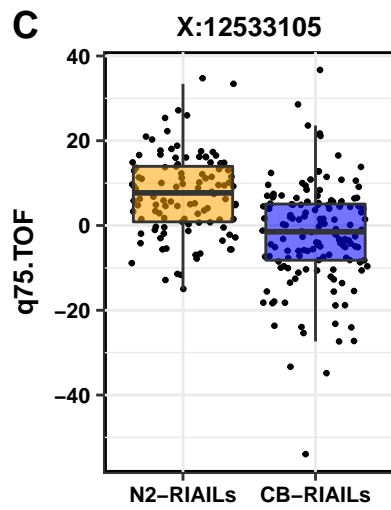

**A** diquat.q90.TOF

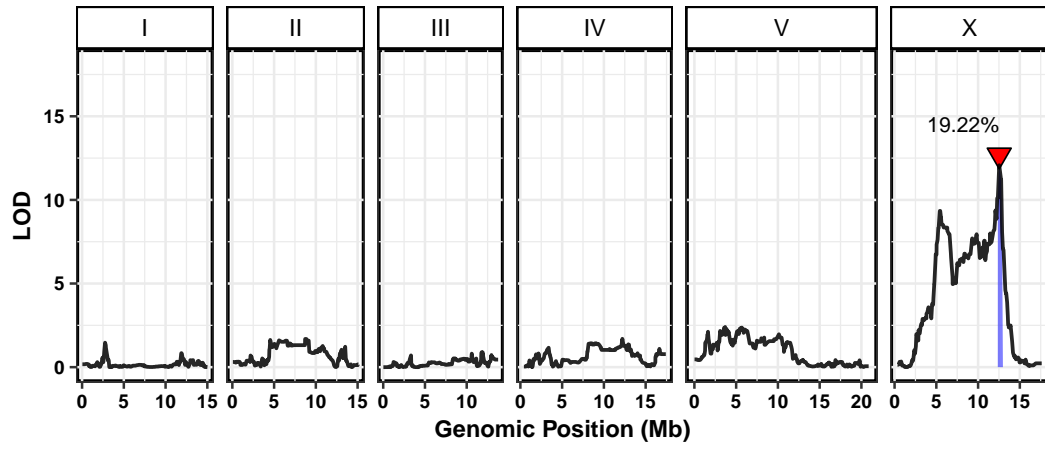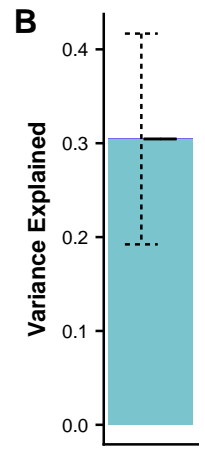

**C** X:12533105

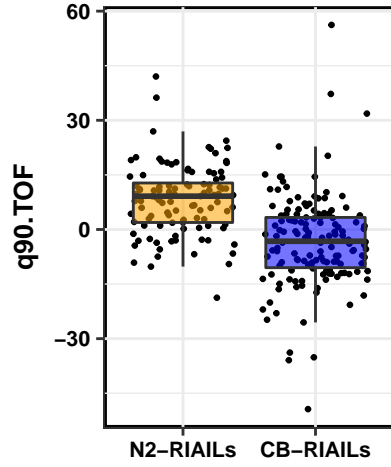

**A** fluoxetine.cv.EXT

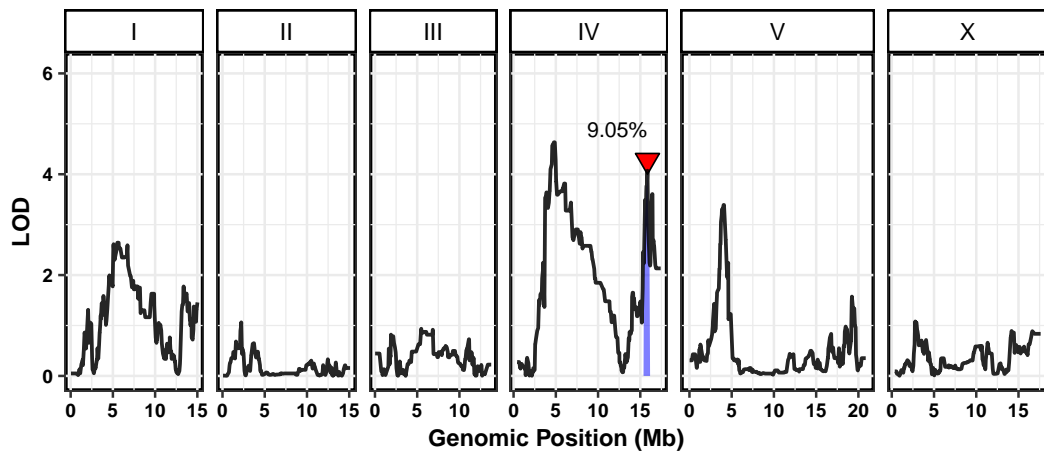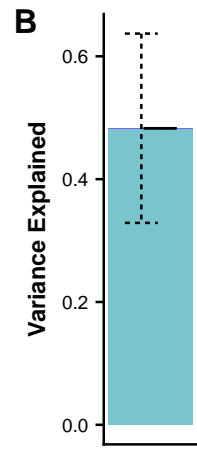

**C** IV:15849940

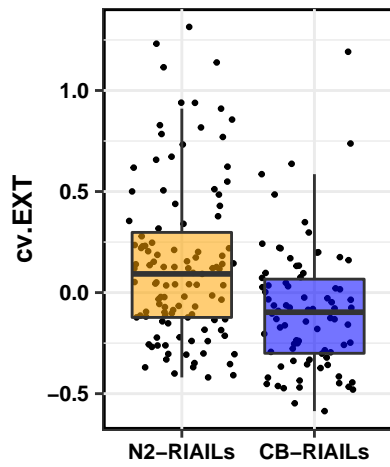

NIL

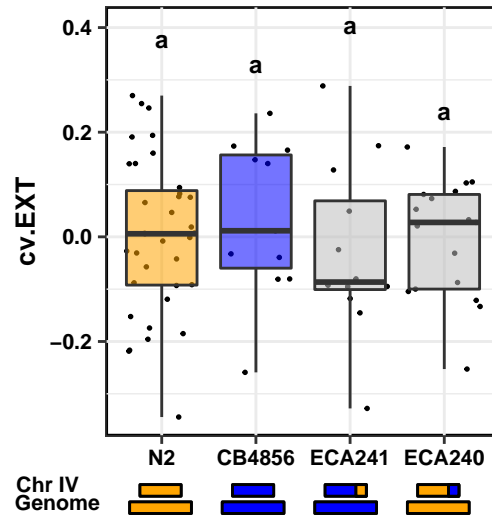

**A** fluoxetine.mean.norm.EXT

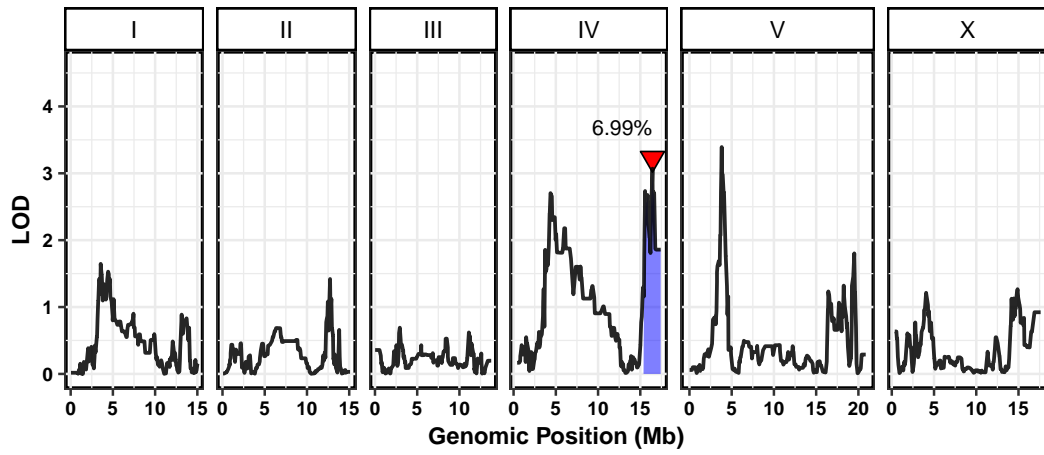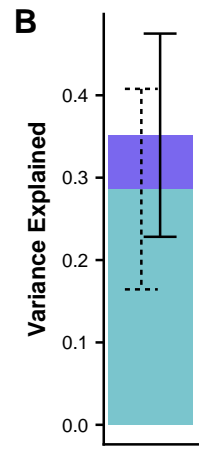

**C**

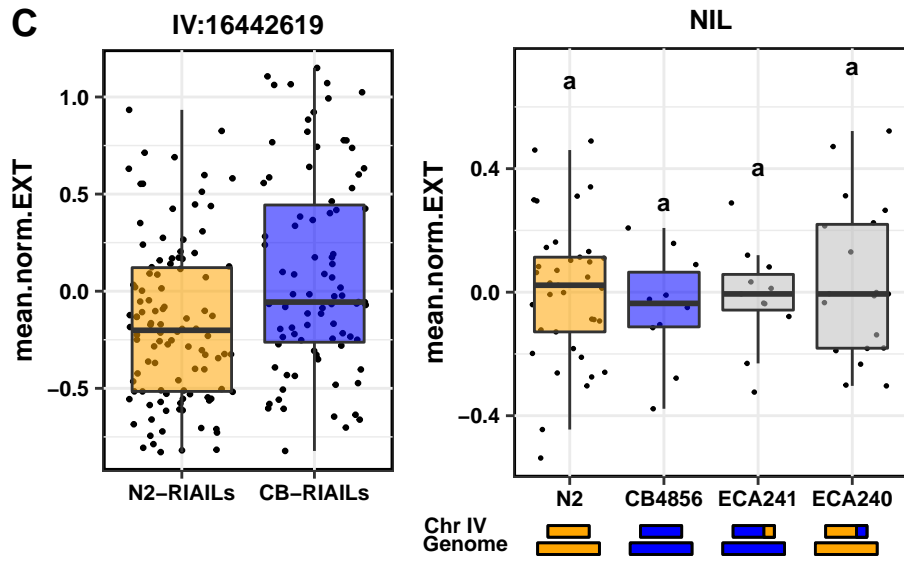

**A** fluoxetine.median.EXT

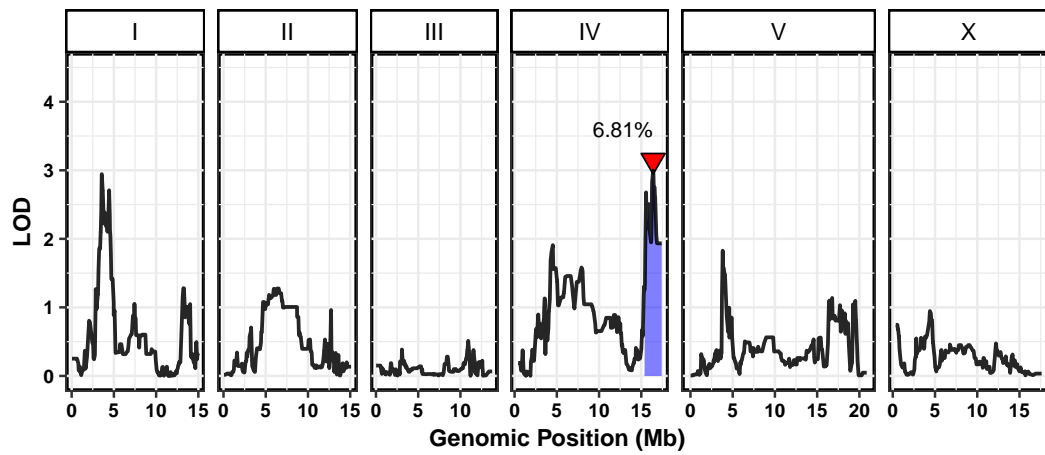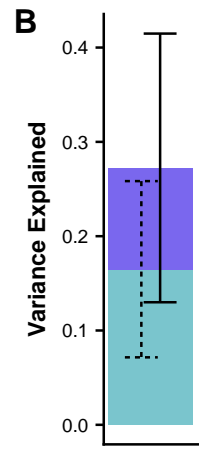

**C**

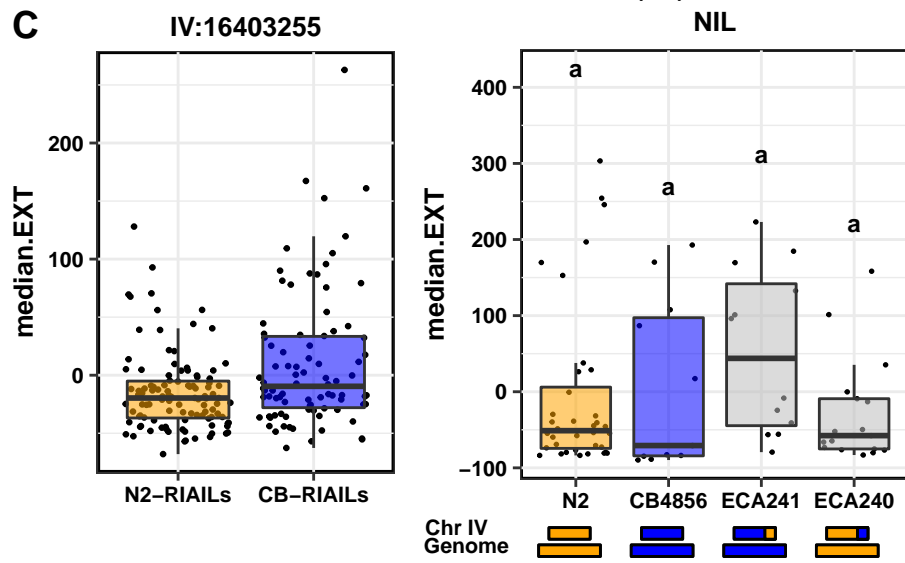

**A** fluoxetine.median.norm.EXT

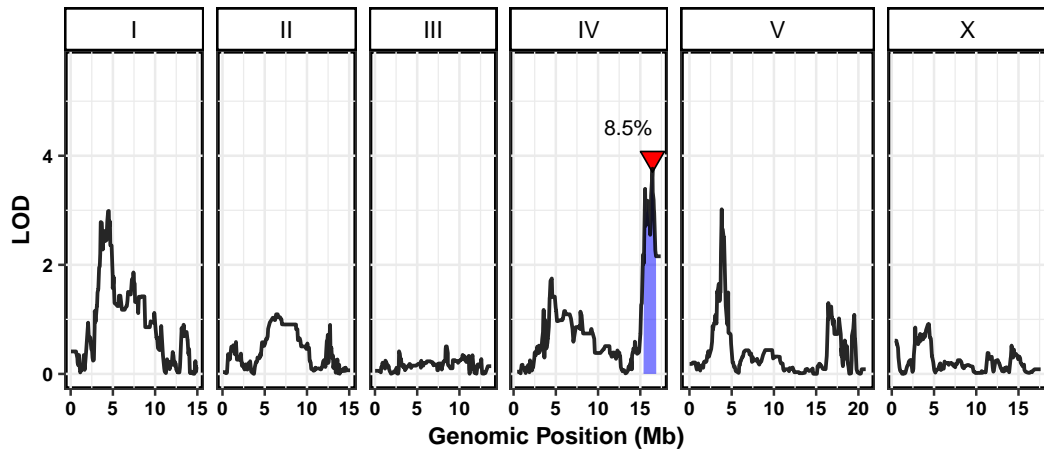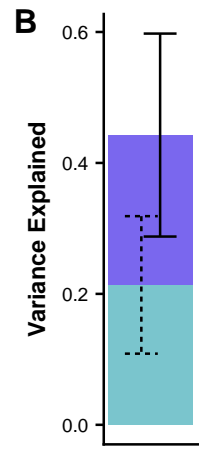

**C** IV:16442619

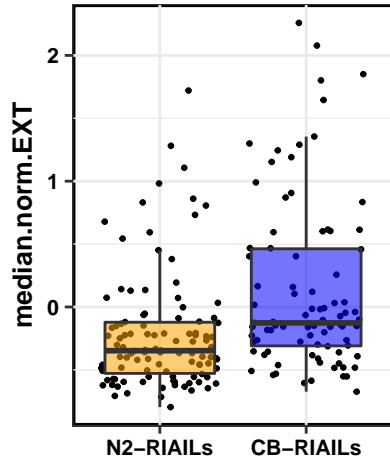

NIL

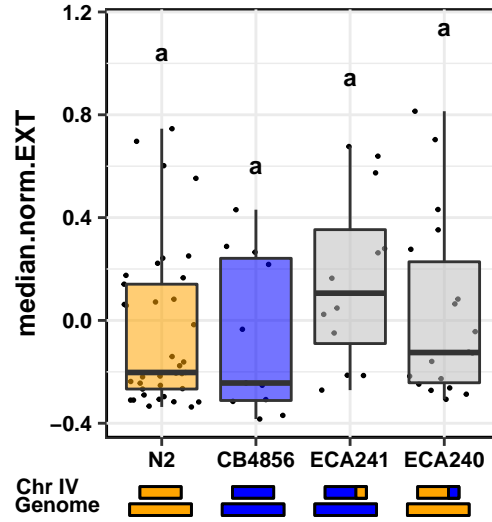

**A** fluoxetine.n

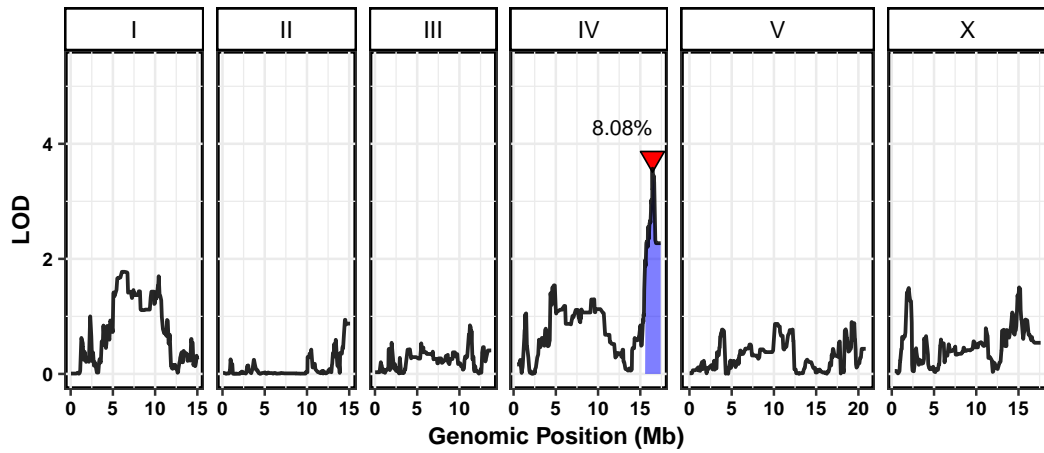

**B**

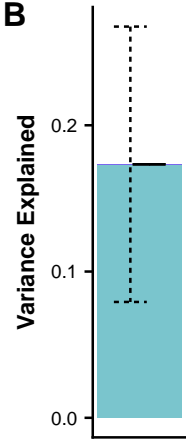

**C**

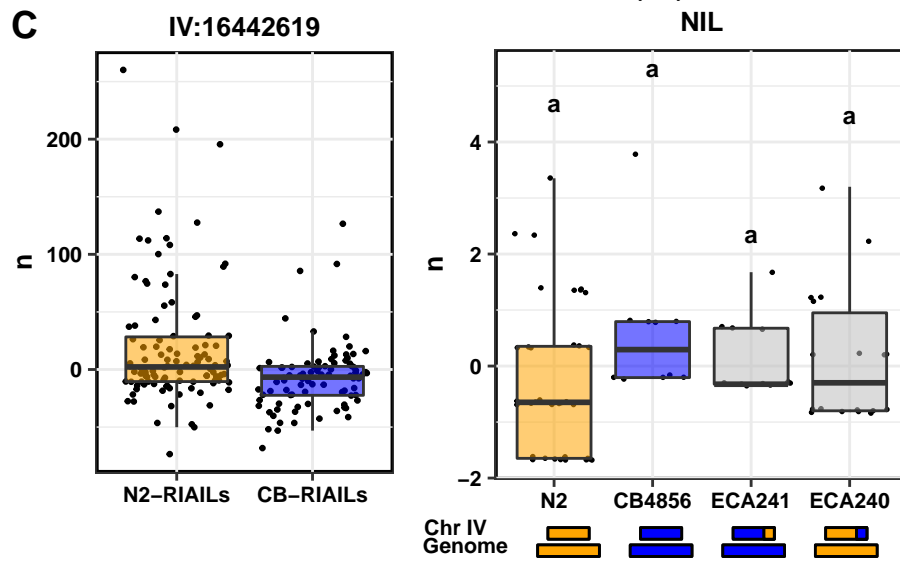



**A** fluoxetine.norm.n

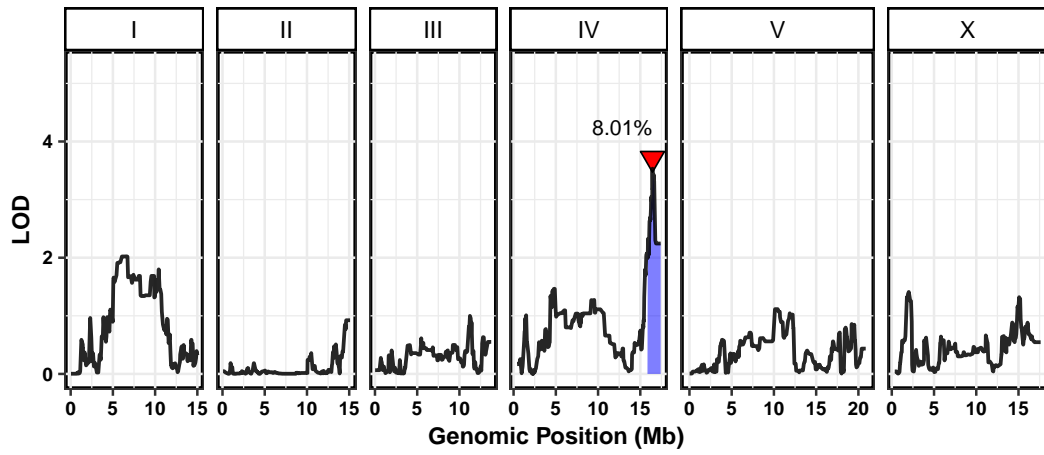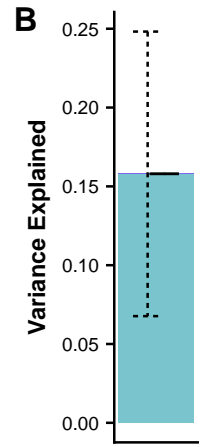

**C** IV:16442619

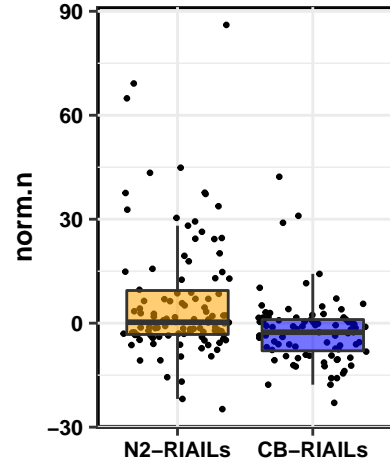

NIL

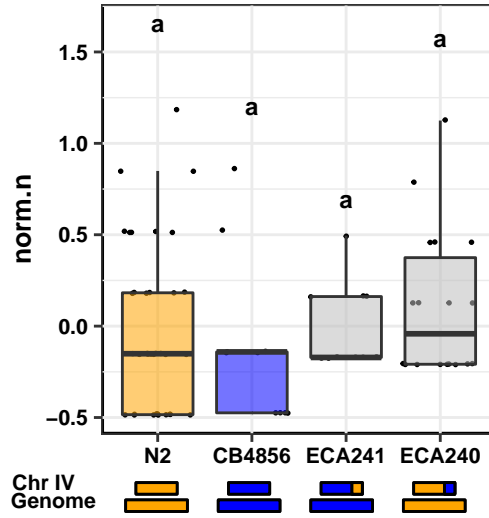

**A** fluoxetine.q10.EXT

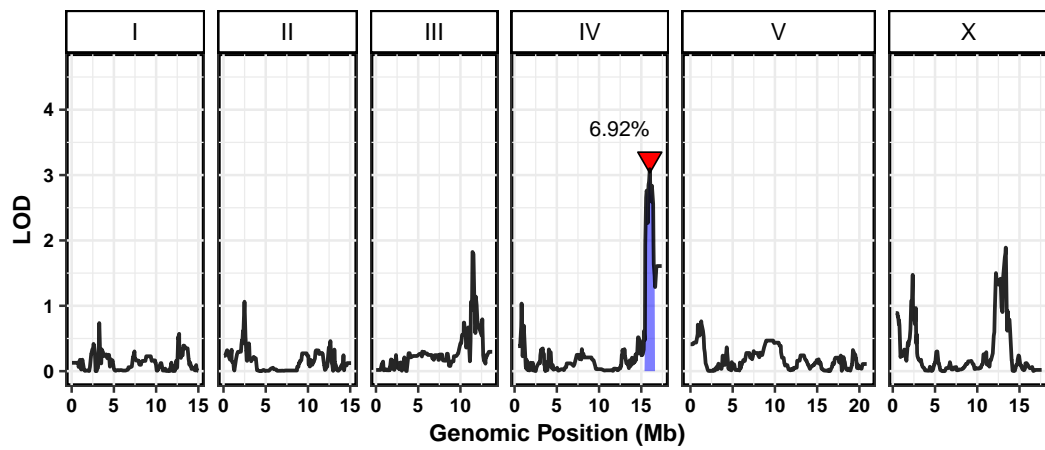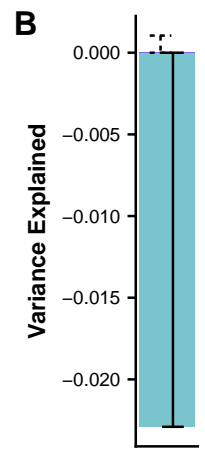

**C**

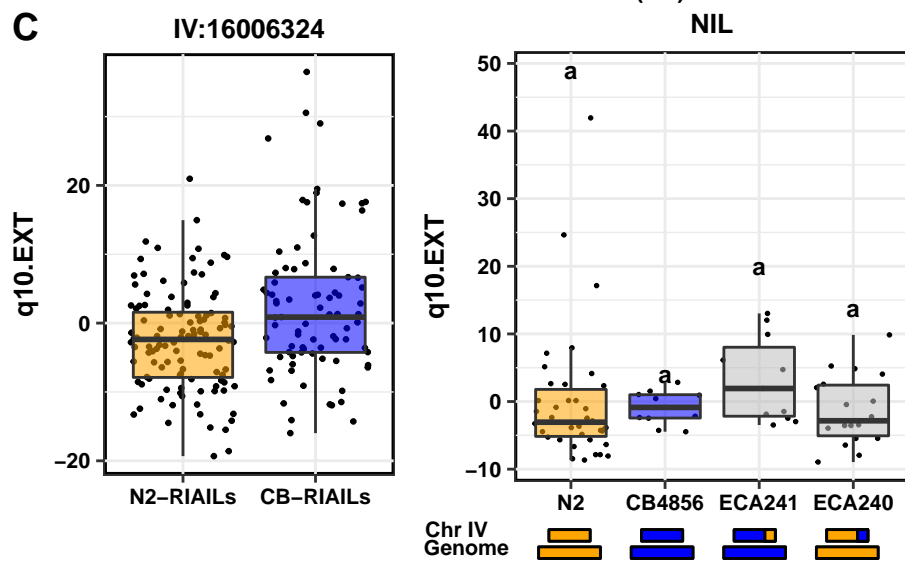

**A** fluoxetine.q10.norm.EXT

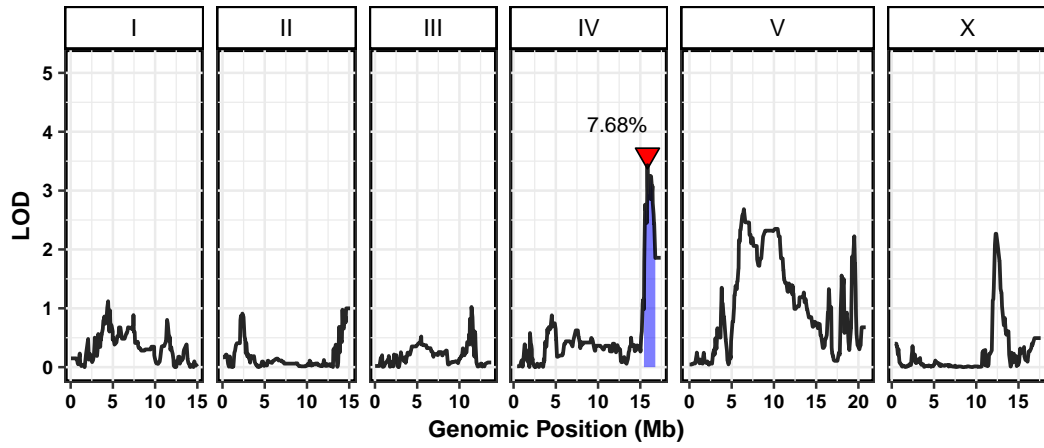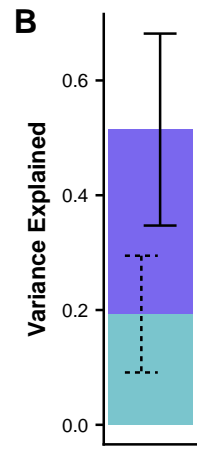

**C** IV:15849940

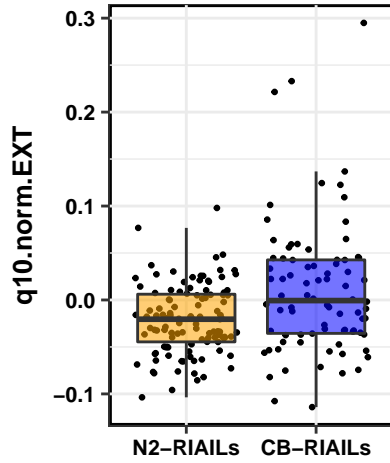

NIL

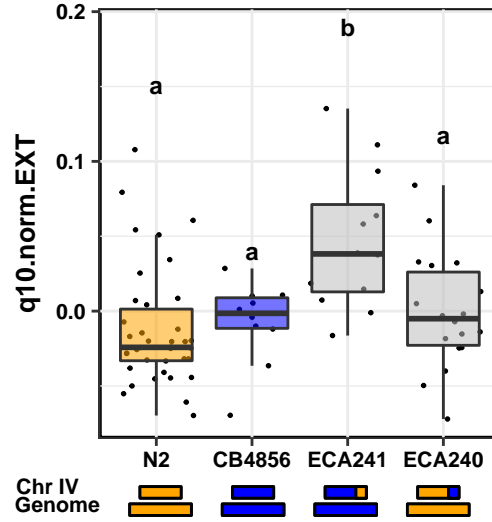

**A** fluoxetine.q25.EXT

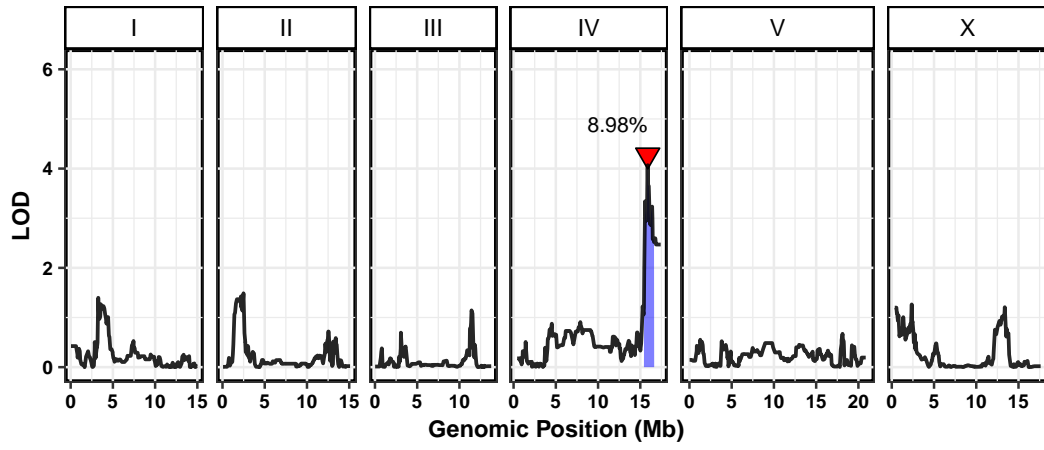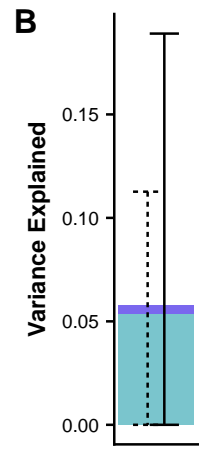

**C** IV:15879951

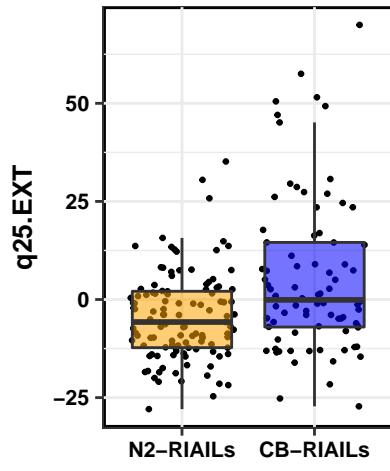

NIL

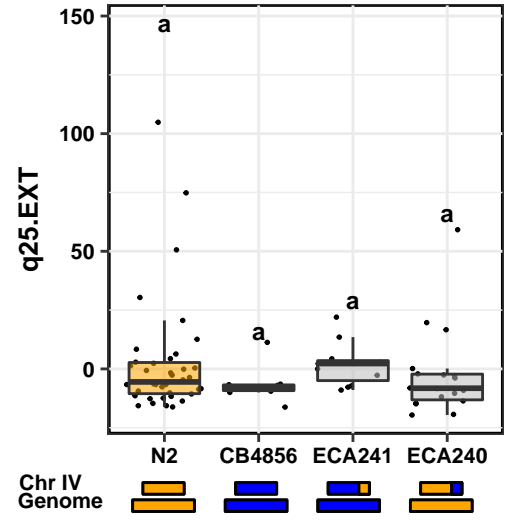

**A** fluoxetine.q25.norm.EXT

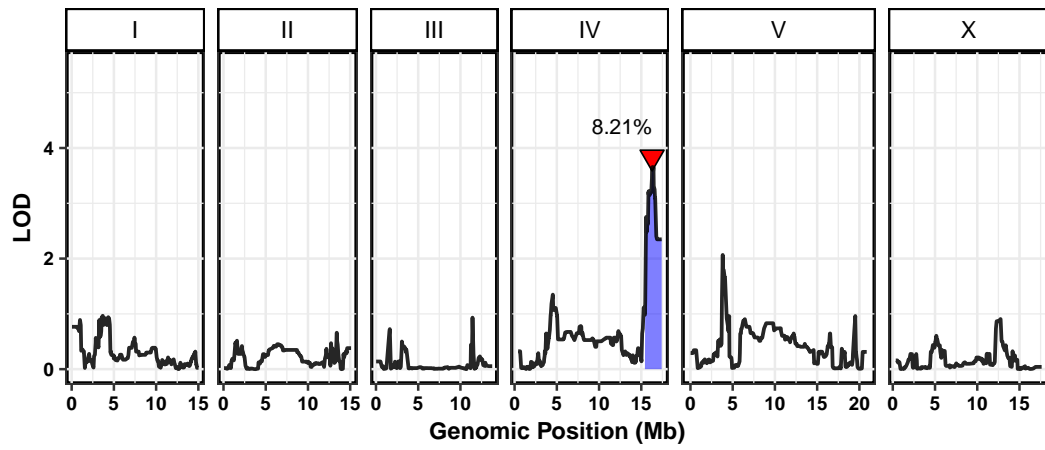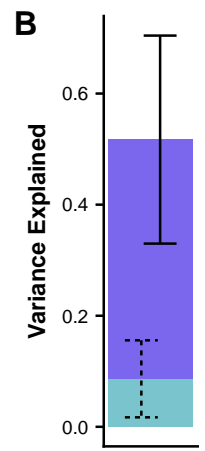

**C**

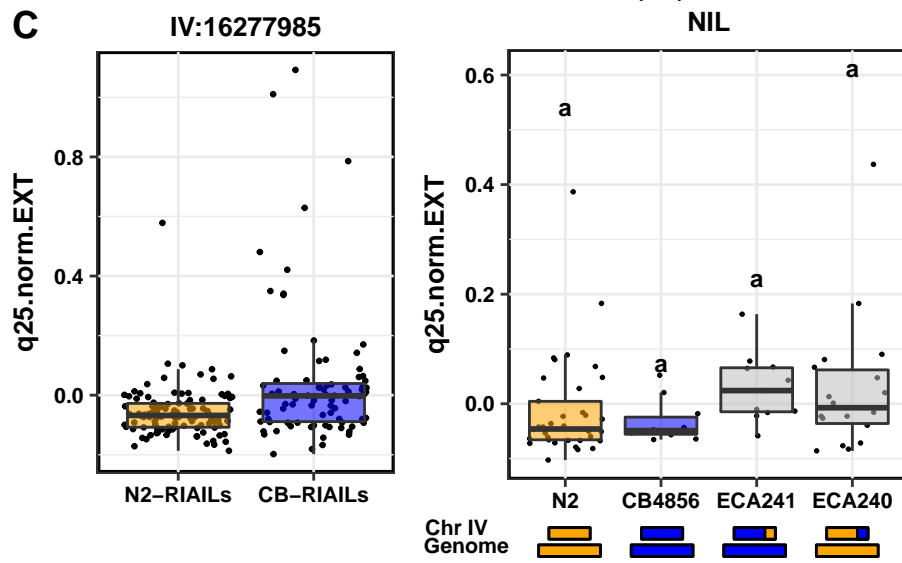

### A fluoxetine.q75.norm.EXT

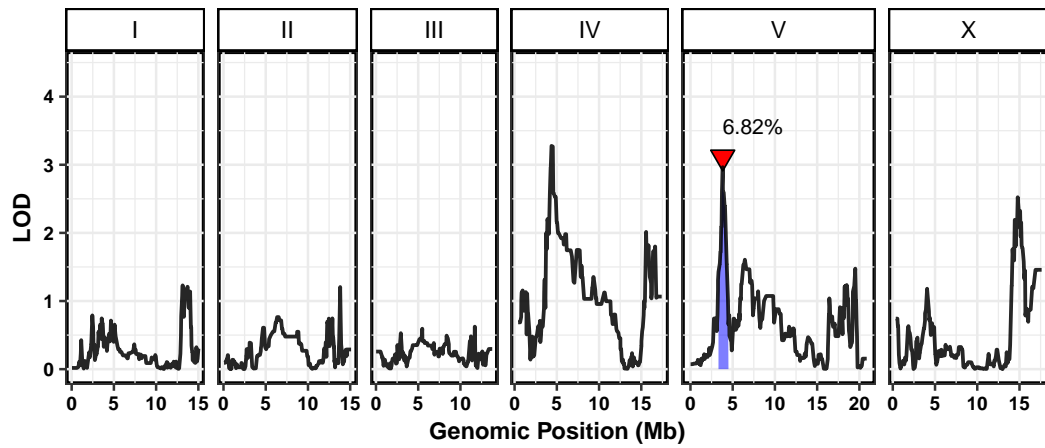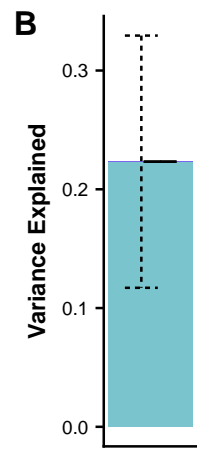

### C V:3819945

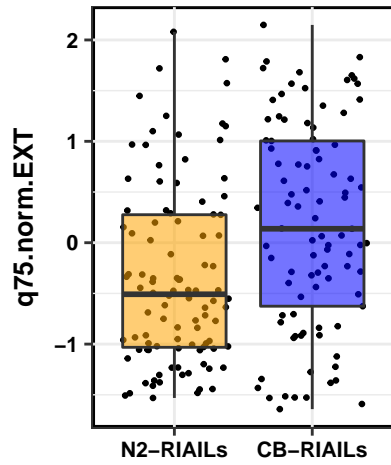

**A** fluoxetine.var.EXT

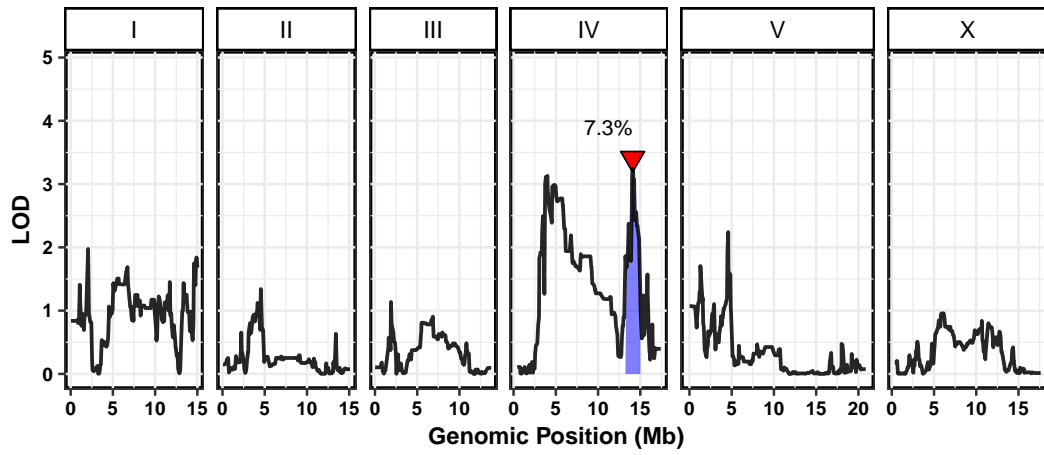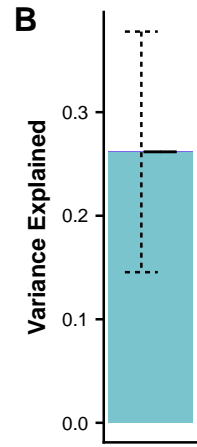

**C**

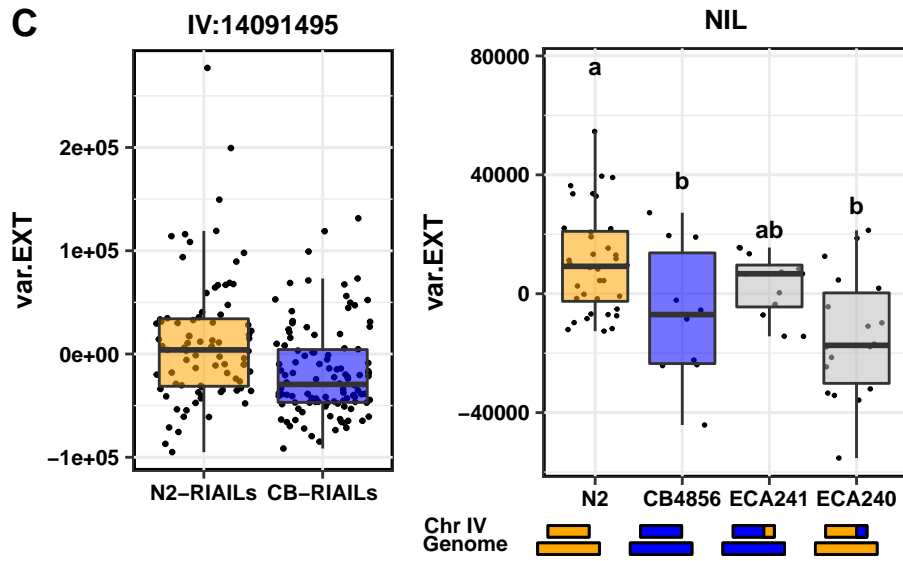

### A FUDR.mean.TOF

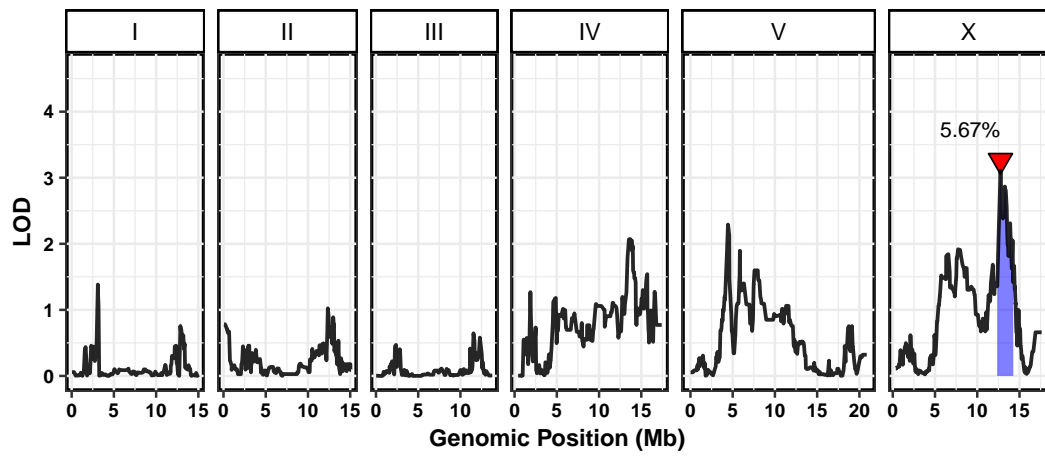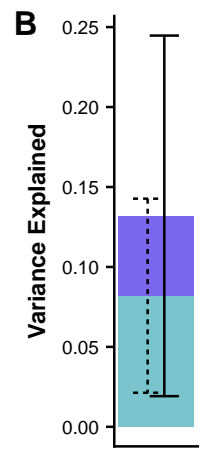

### C

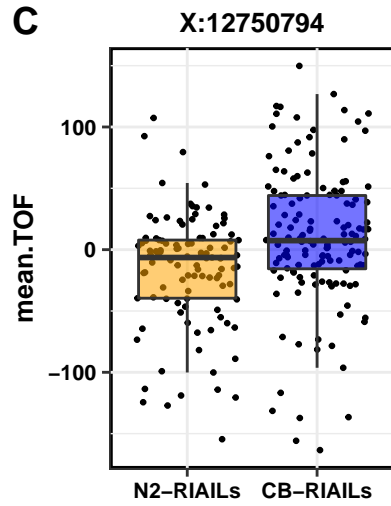



### A FUDR.median.EXT

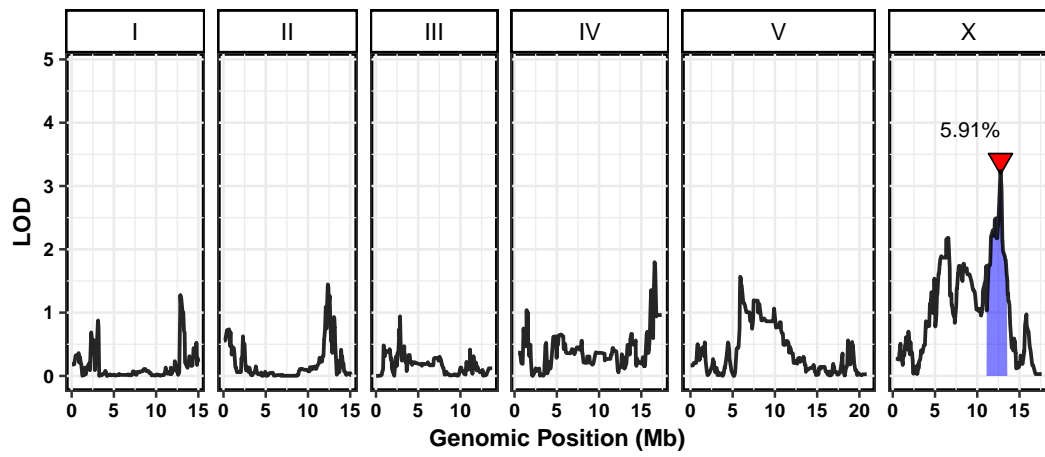

### B

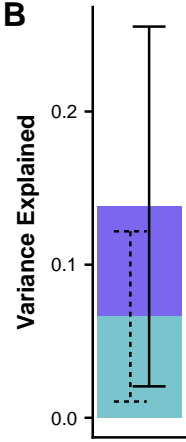

### C

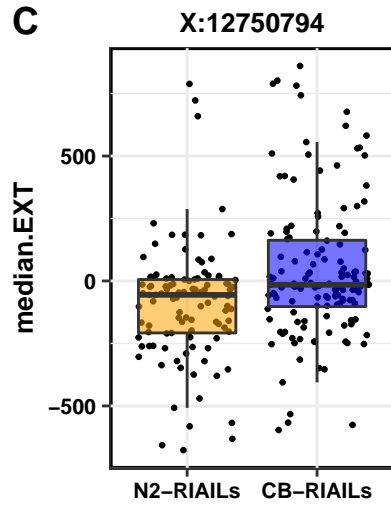

### A FUdR.q75.EXT

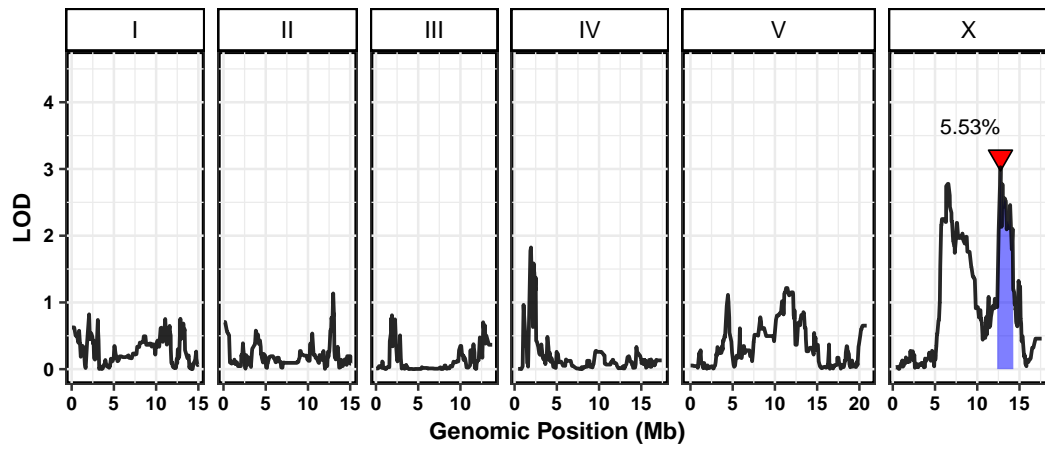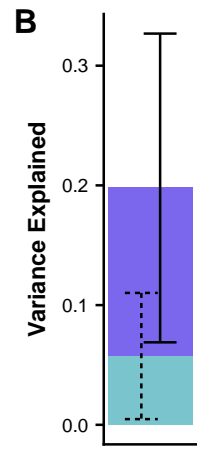

### C X:12750794

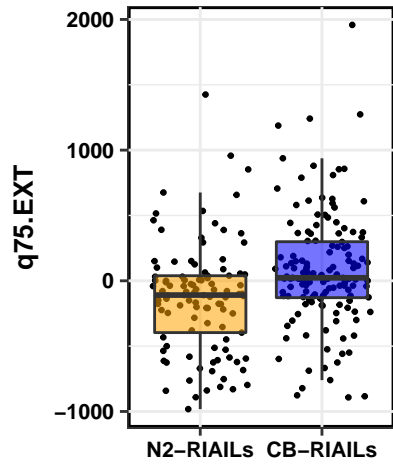

### A FUDR.q75.norm.EXT

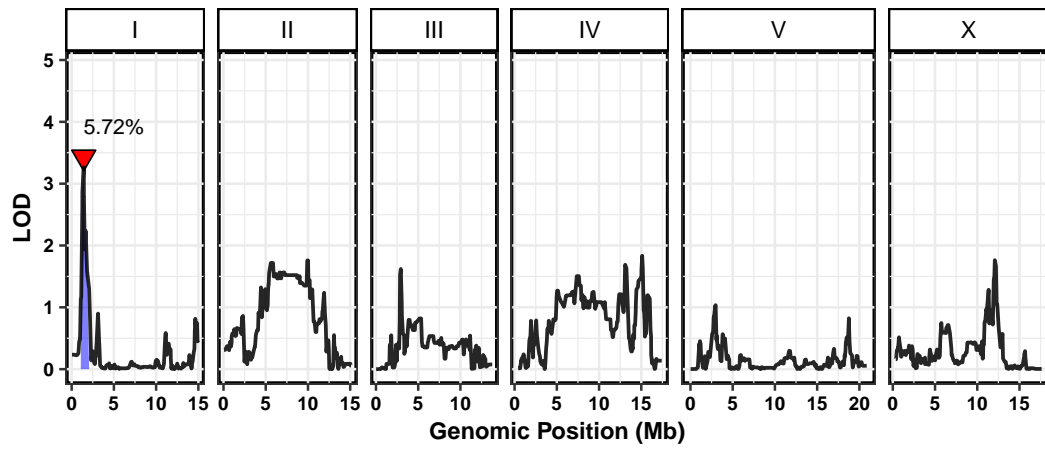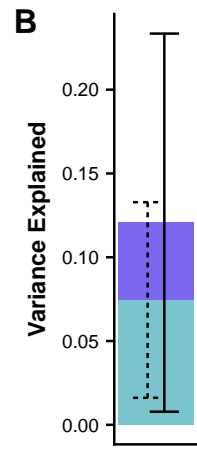

### C I:1433303

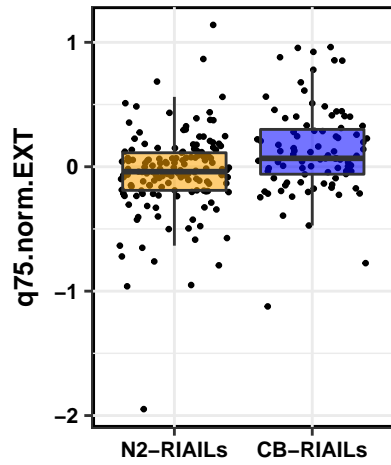

### A FUdR.q75.TOF

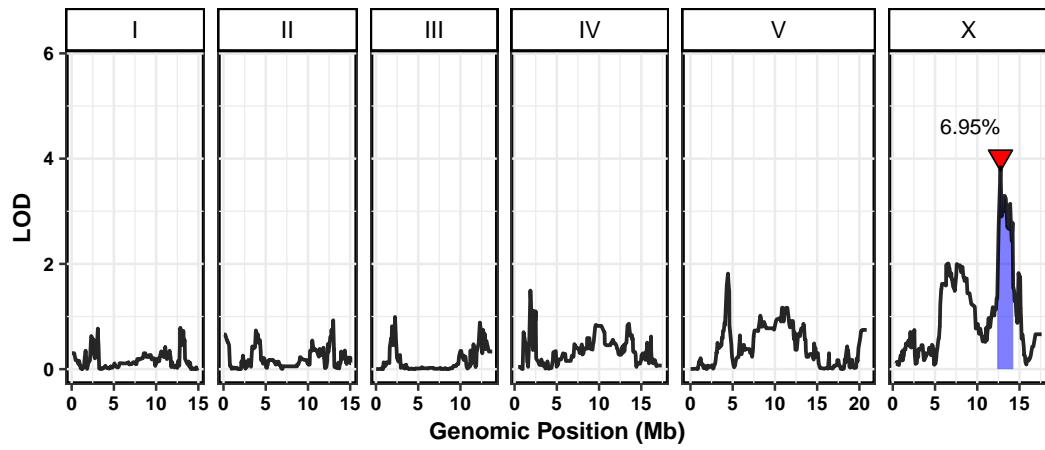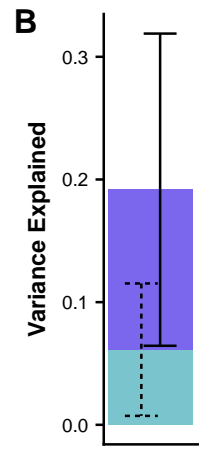

### C X:12750794

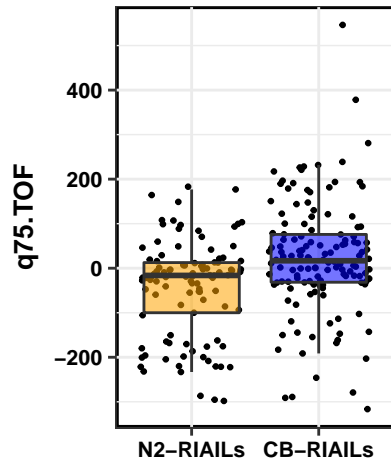

### A FUDR.q90.norm.EXT

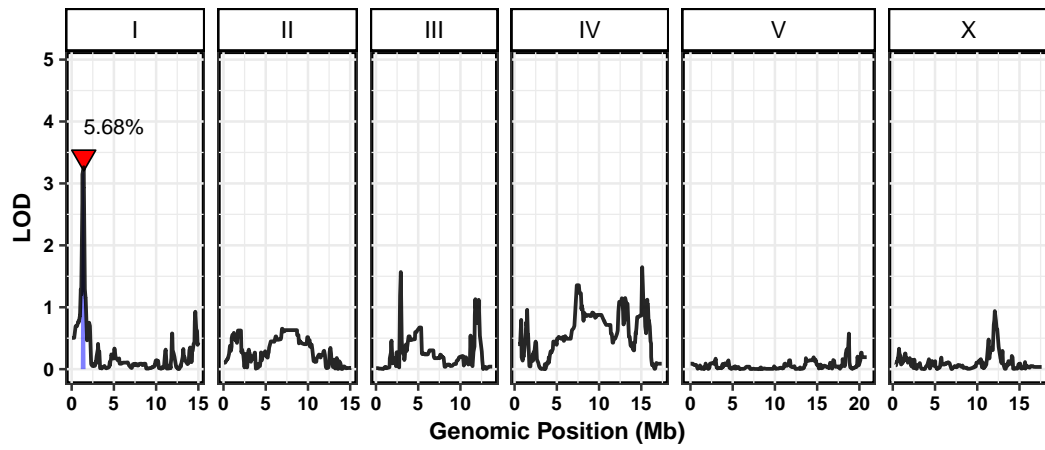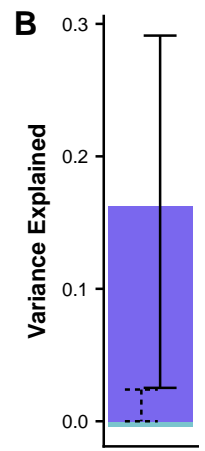

### C I:1433303

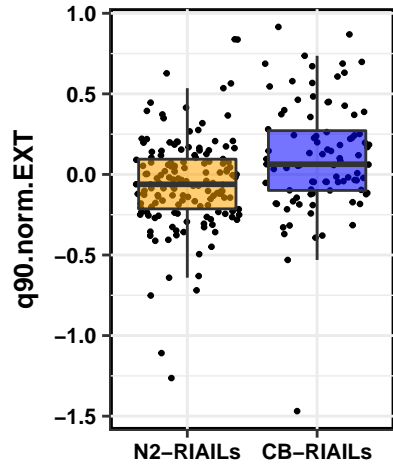

**A** irinotecan.cv.EXT

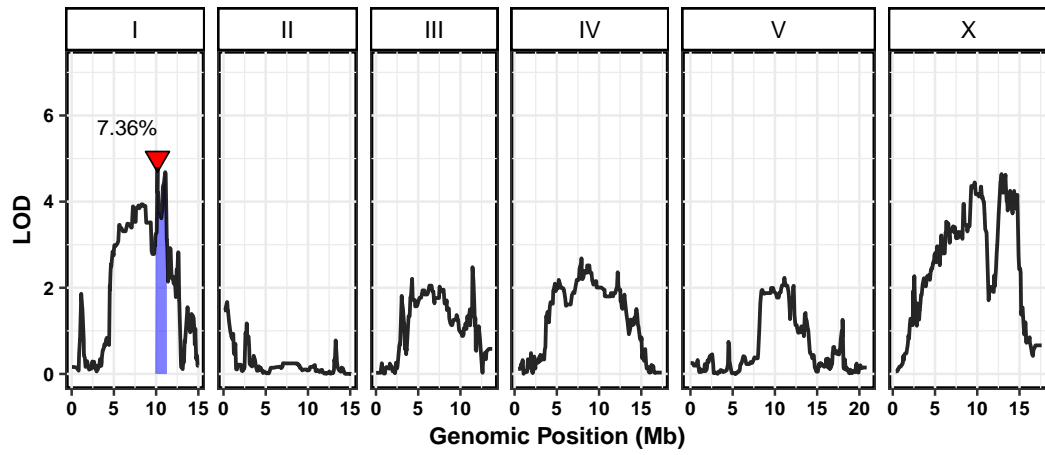

**B**

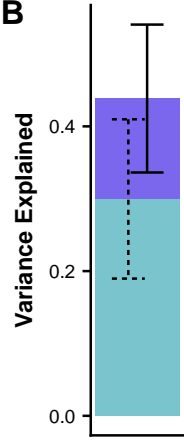

**C**

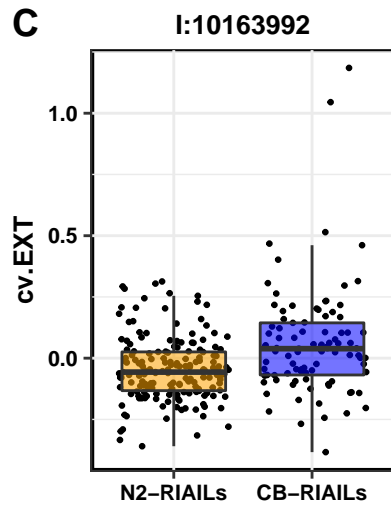

### A irinotecan.cv.TOF

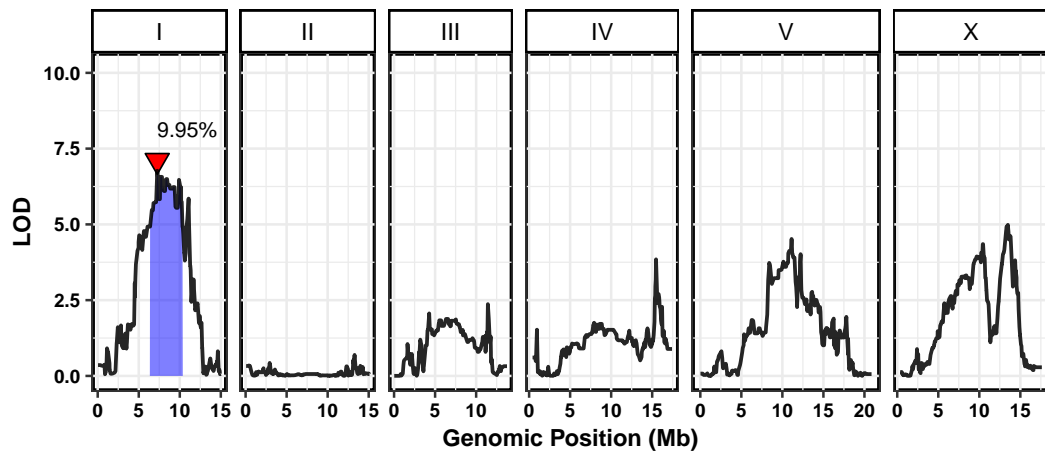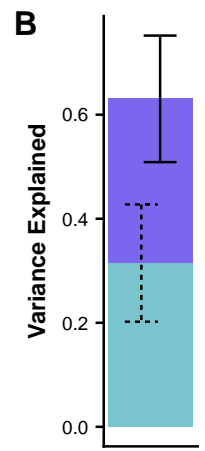

### C I:7254665

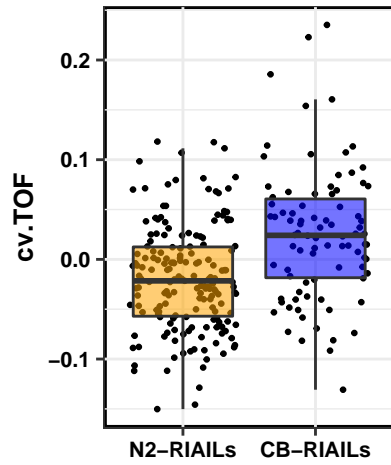

### A irinotecan.mean.EXT

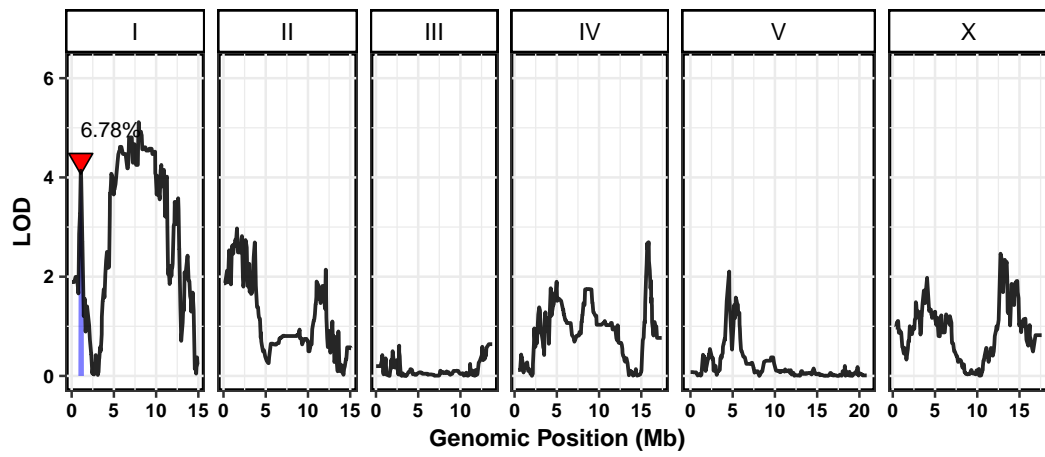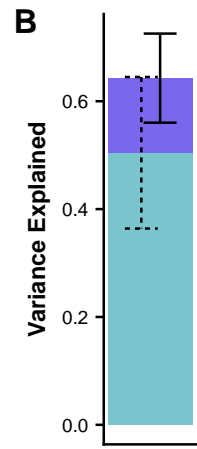

### C I:1079163

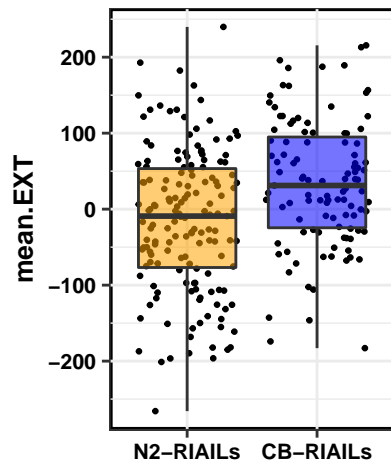



### A irinotecan.mean.norm.EXT

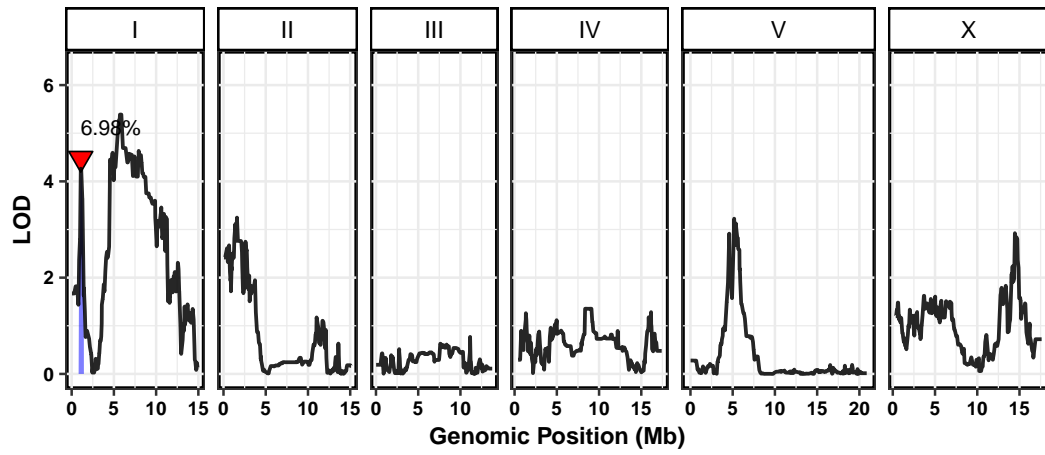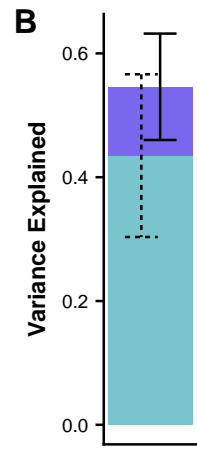

### C I:1079163

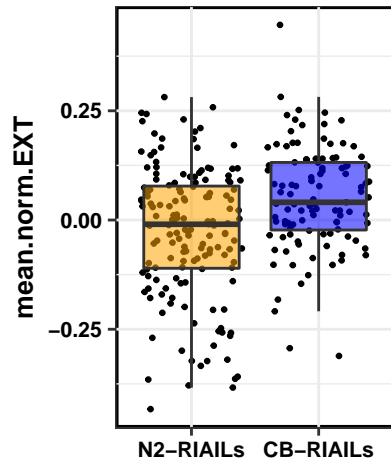

### A irinotecan.mean.TOF

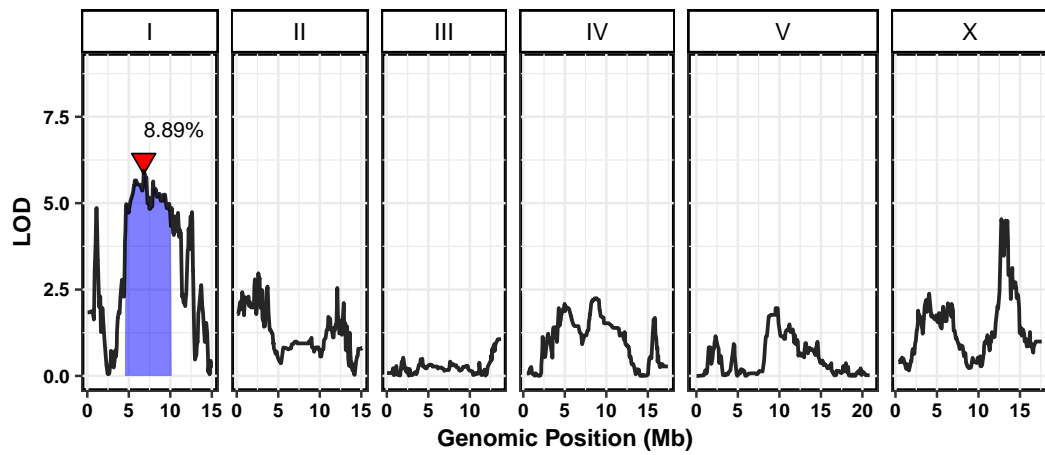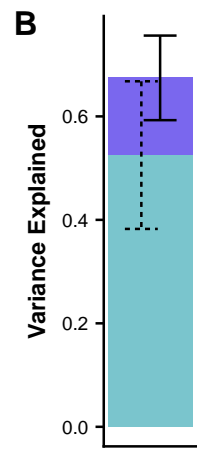

### C I:6795673

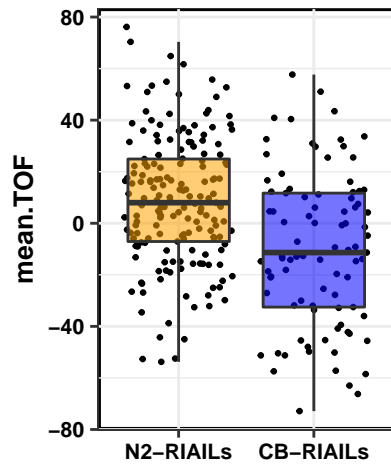

### A irinotecan.median.EXT

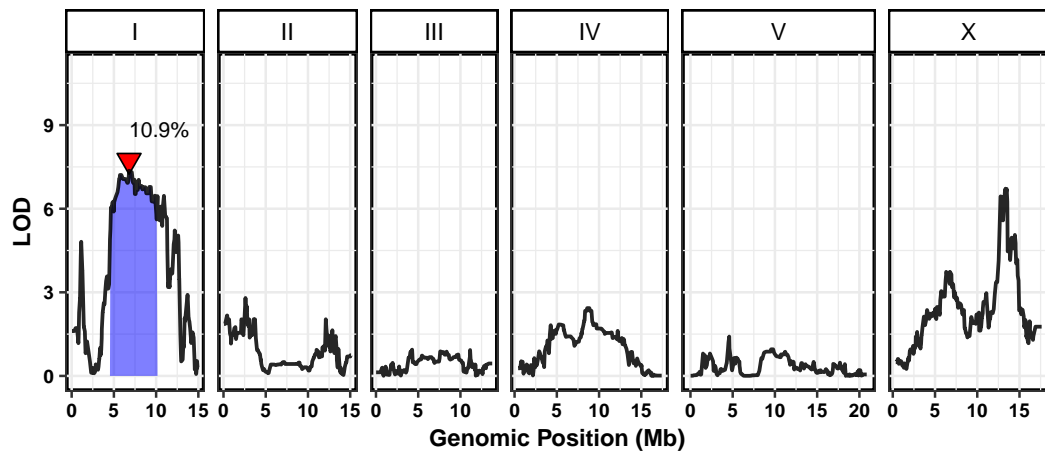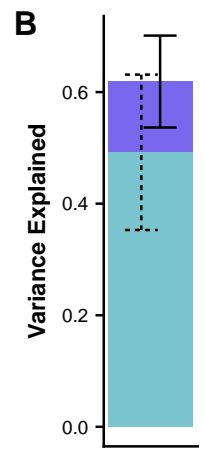

### C I:6795673

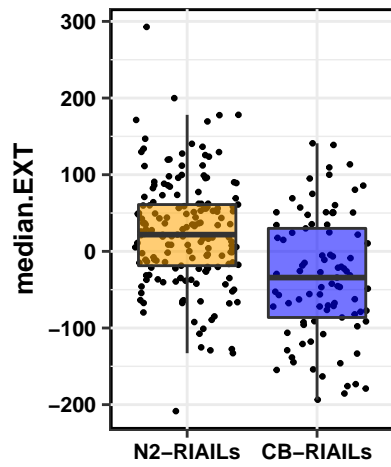

### A irinotecan.median.norm.EXT

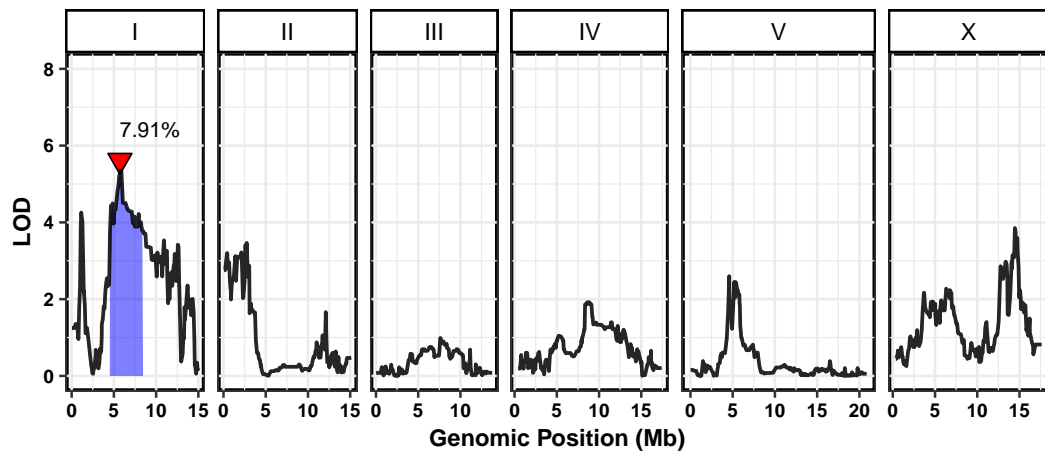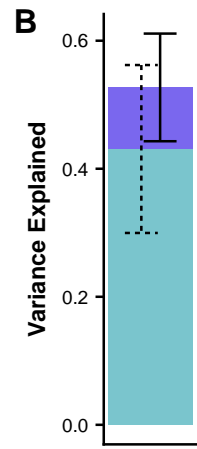

### C I:5715297

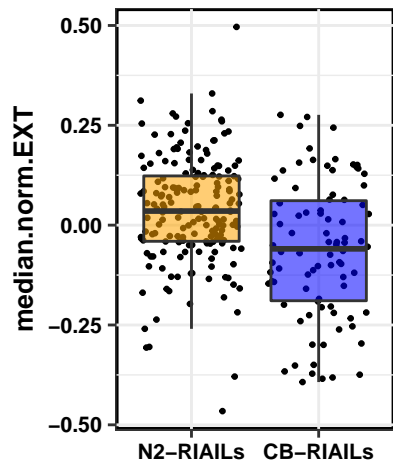

**A** irinotecan.median.TOF

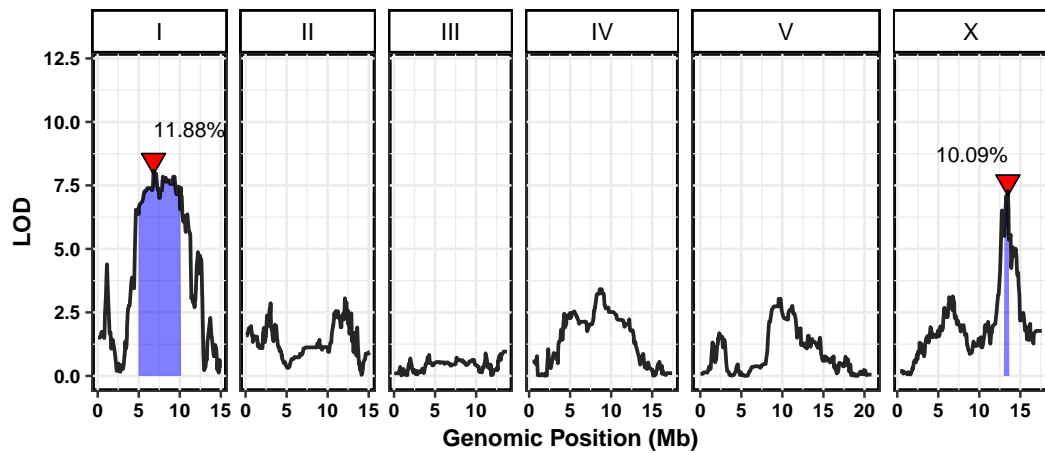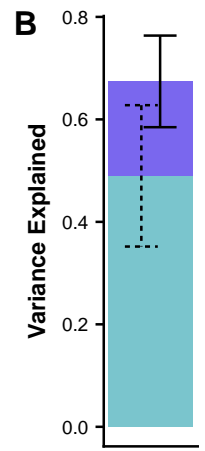

**C** I:6795673

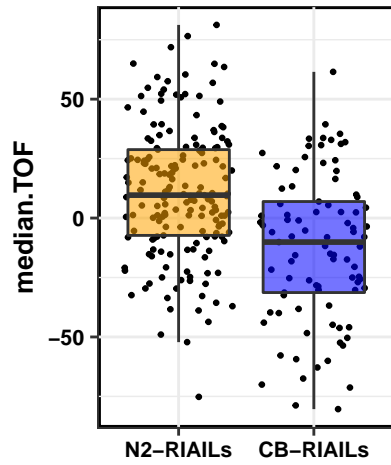

X:13482151

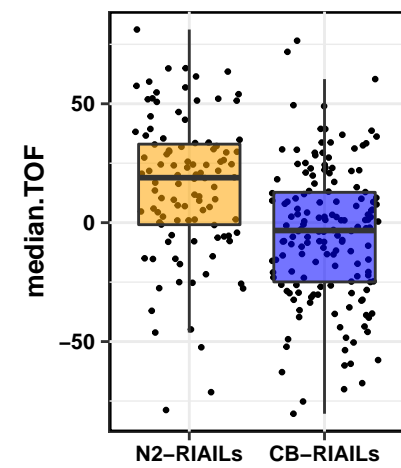

**A** irinotecan.n

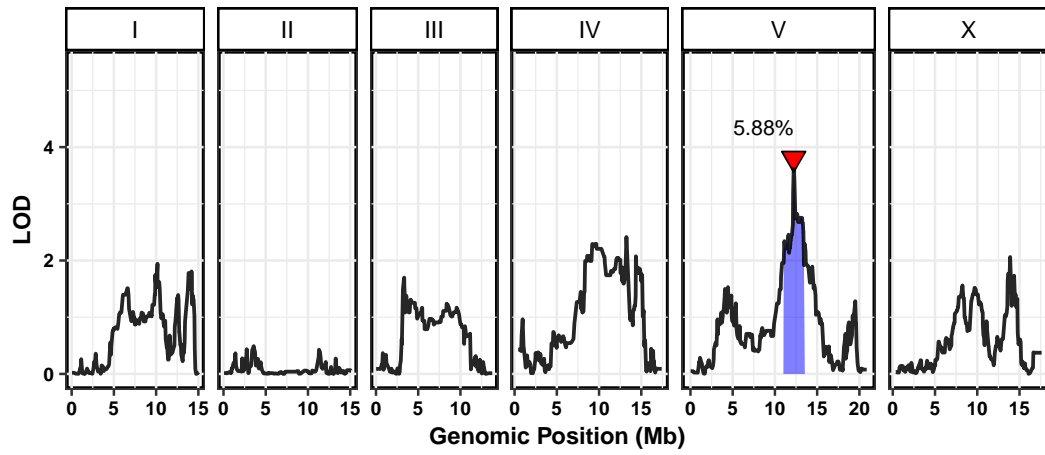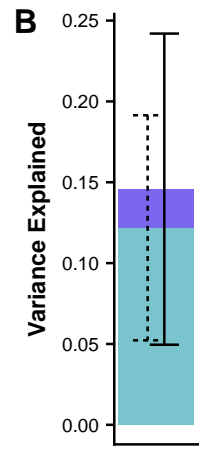

**C** V:12220657

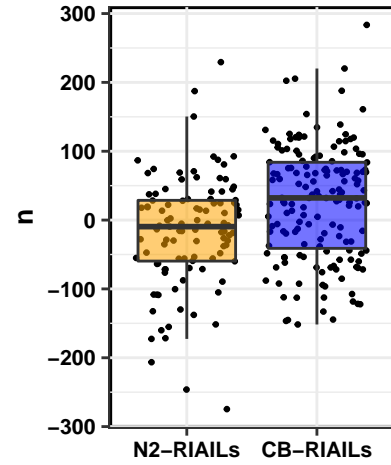

**A** irinotecan.norm.n

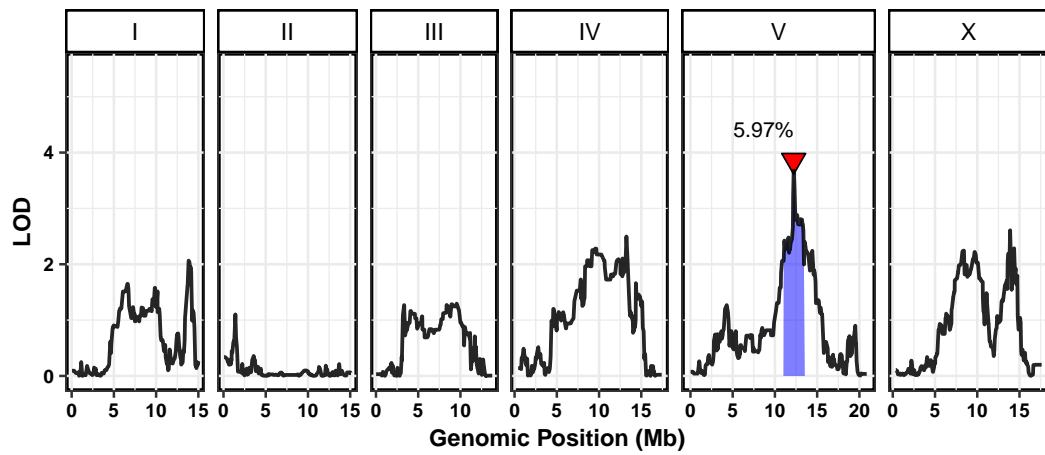

**B**

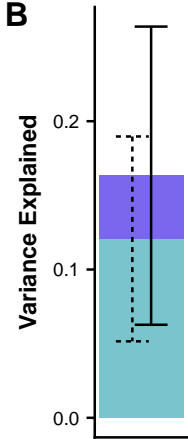

**C**

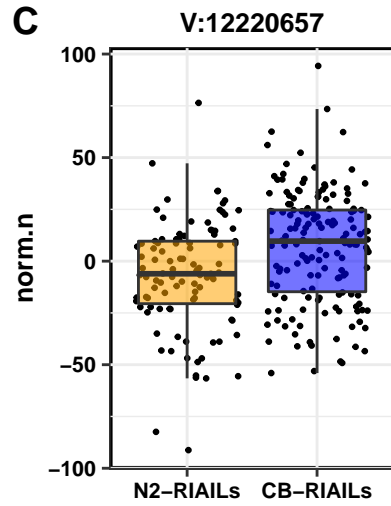

### A irinotecan.q10.EXT

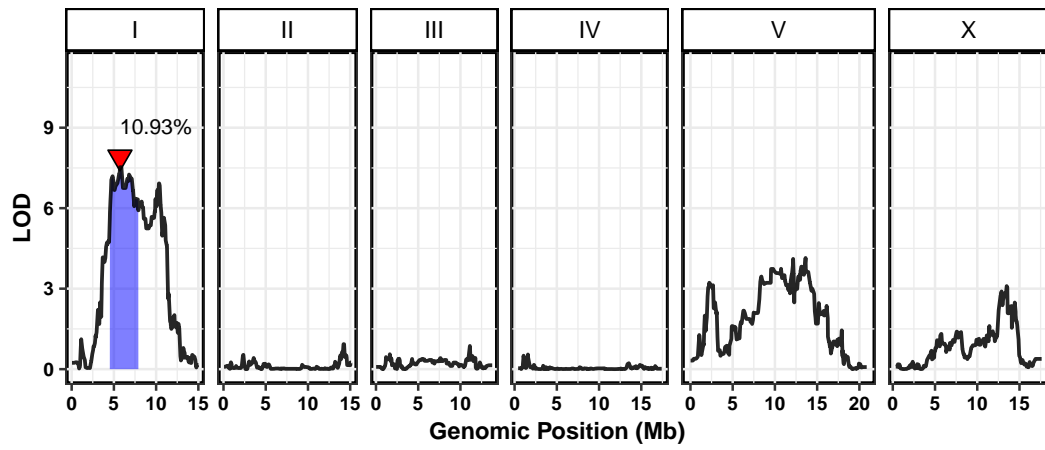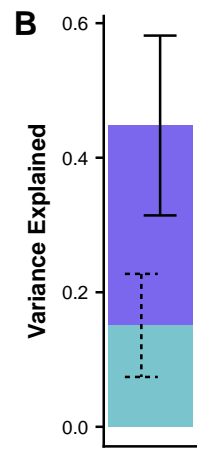

### C

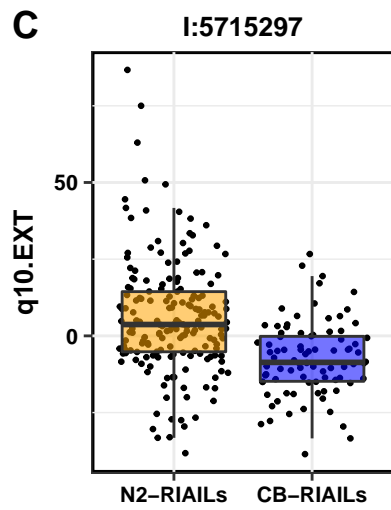



### A irinotecan.q10.norm.EXT

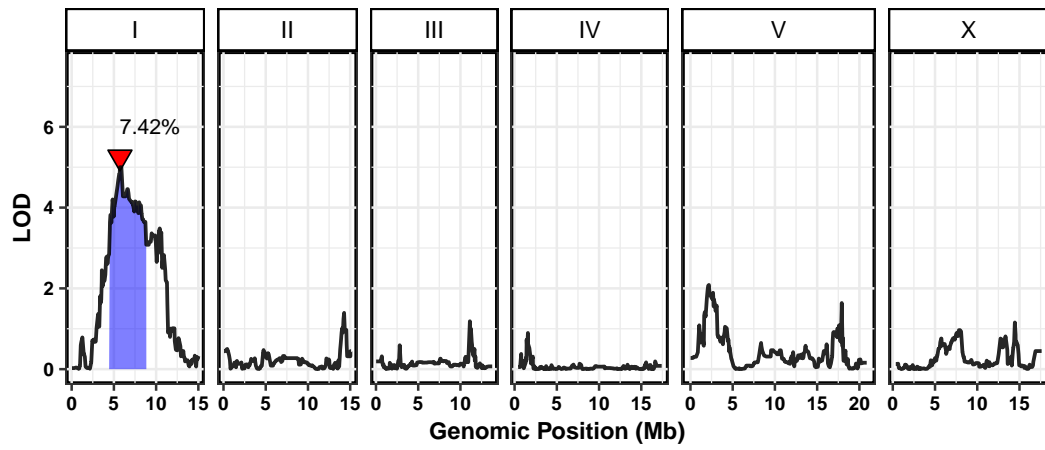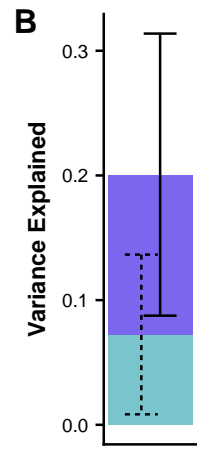

### C

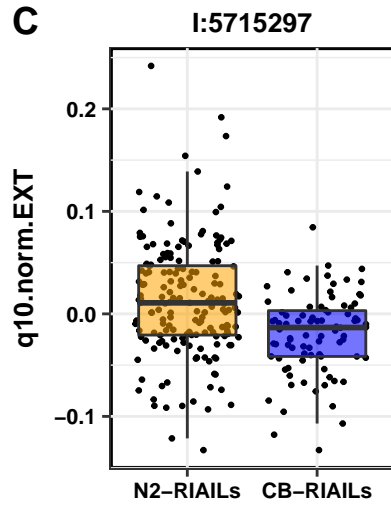

### A irinotecan.q10.TOF

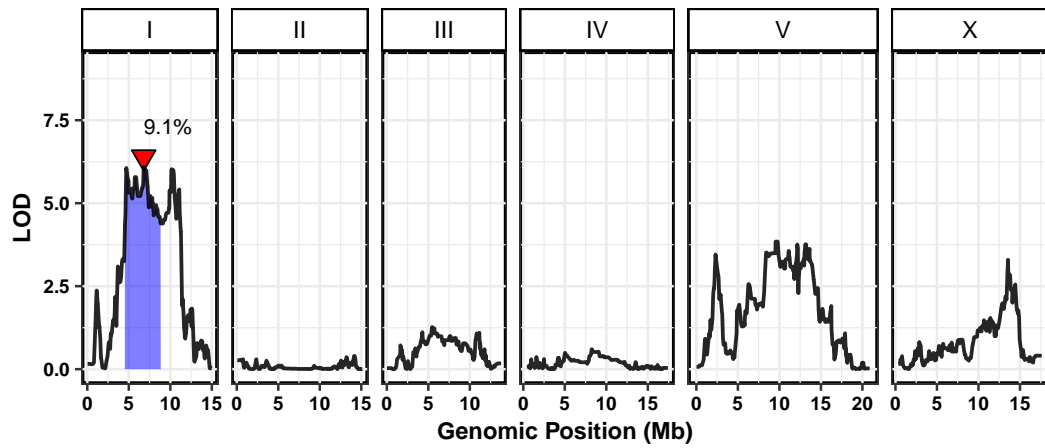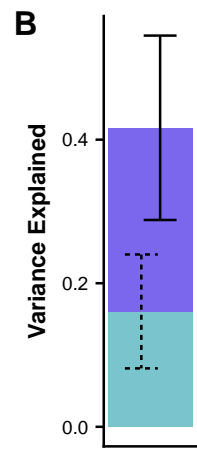

### C I:6795673

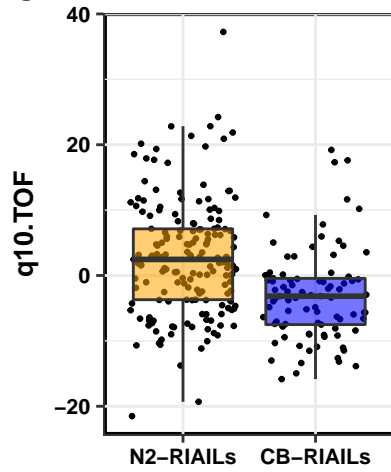

### A irinotecan.q25.EXT

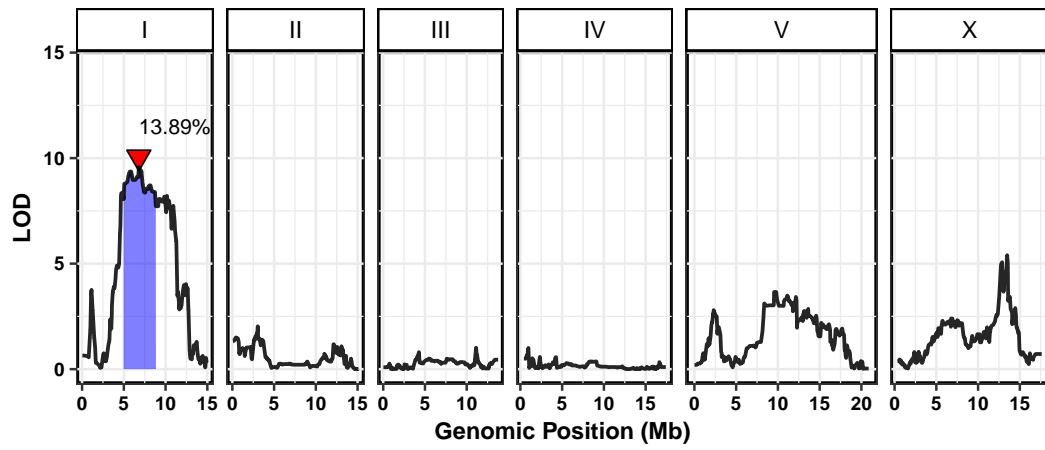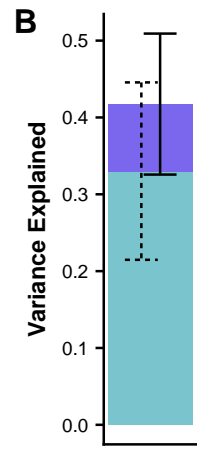

### C I:6795673

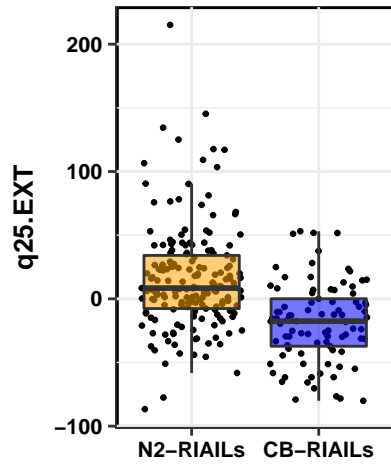

**A** irinotecan.q25.norm.EXT

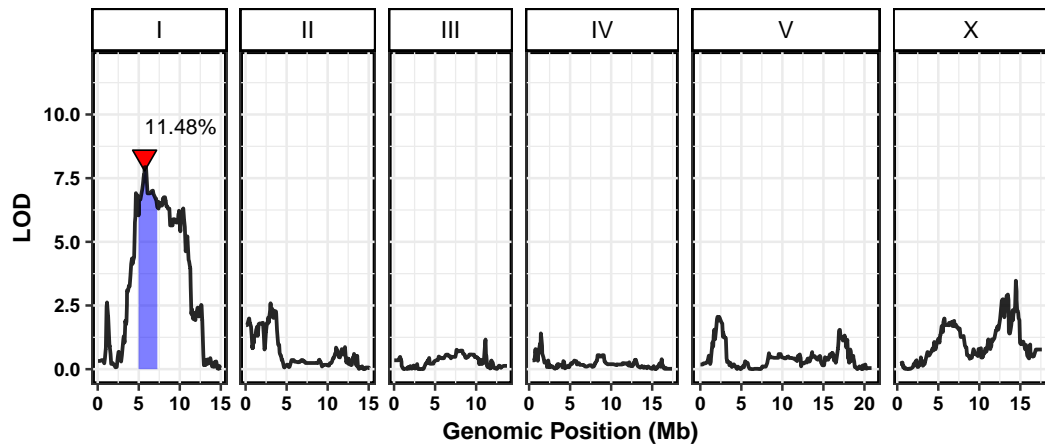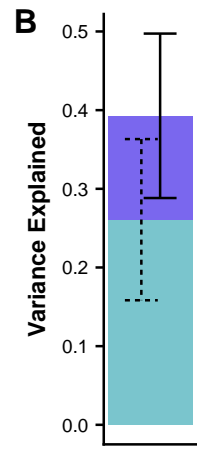

**C** I:5715297

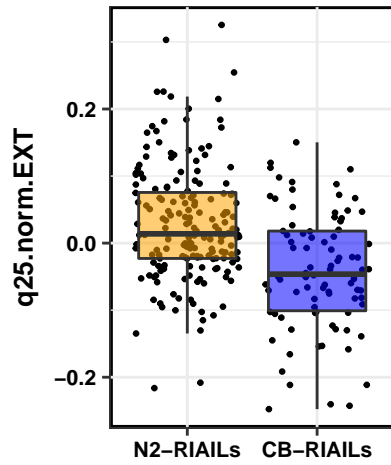

### A irinotecan.q25.TOF

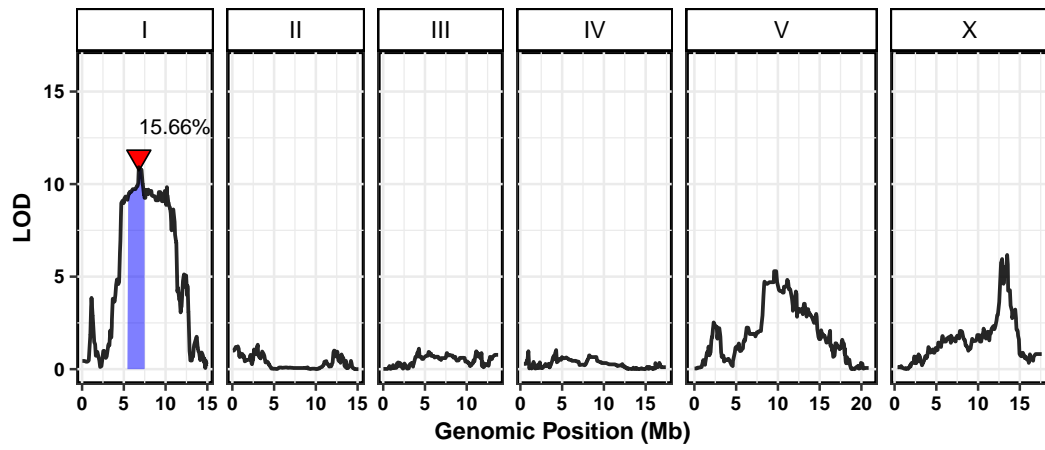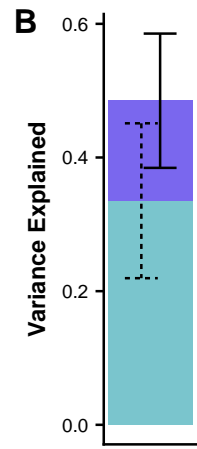

### C I:6795673

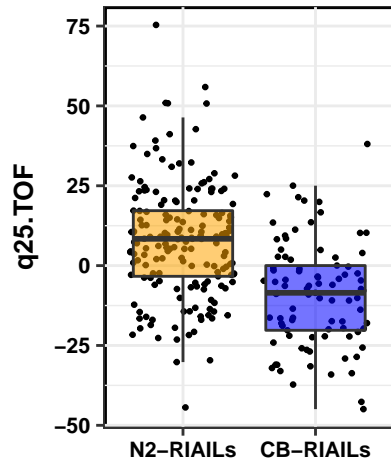

### A irinotecan.q75.EXT

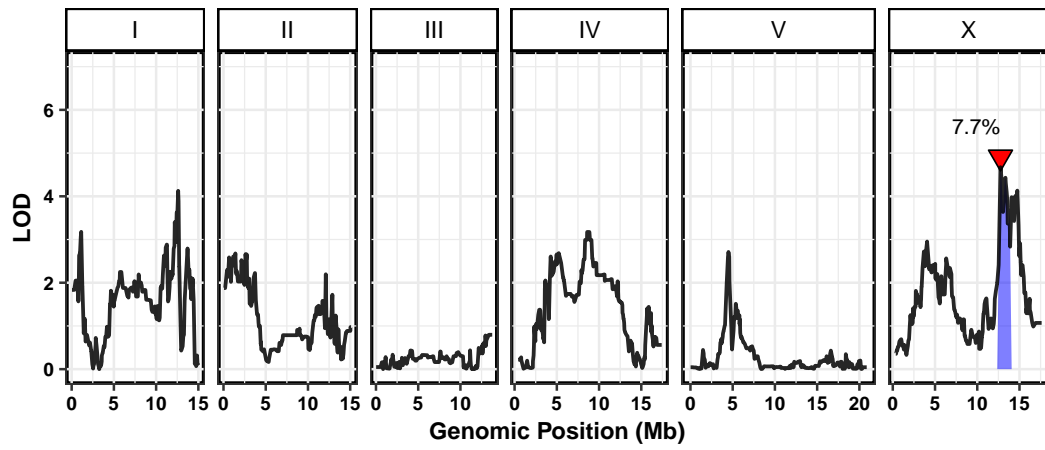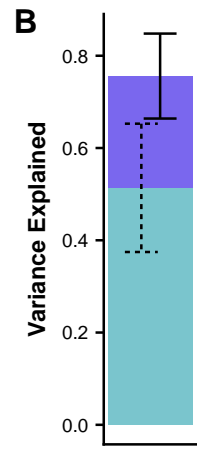

### C X:12750794

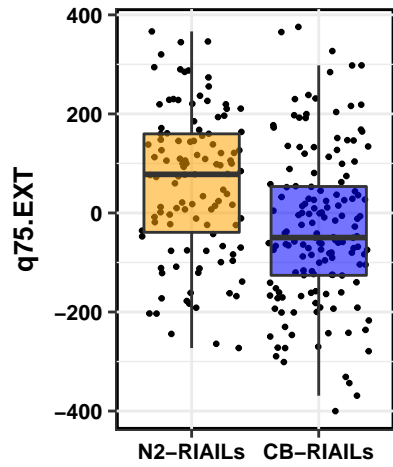

### A irinotecan.q75.norm.EXT

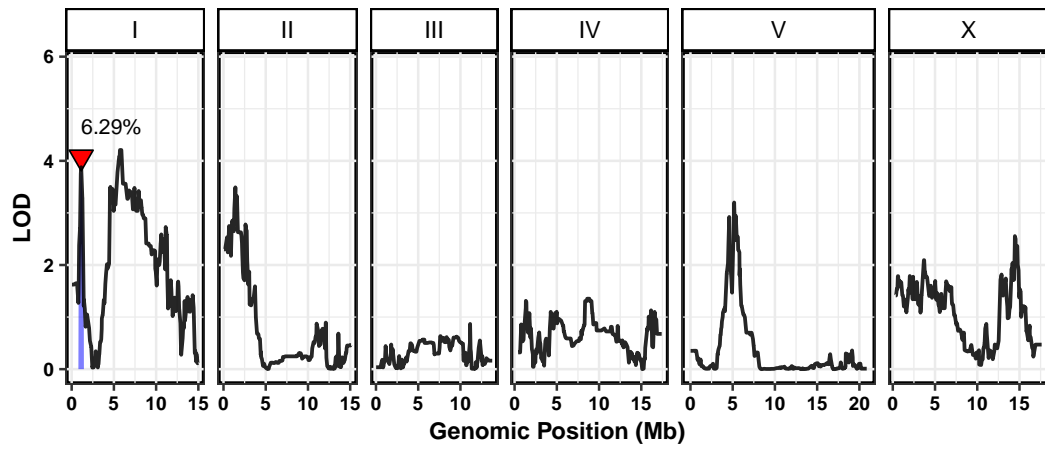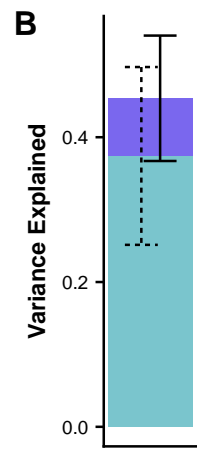

### C I:1130936

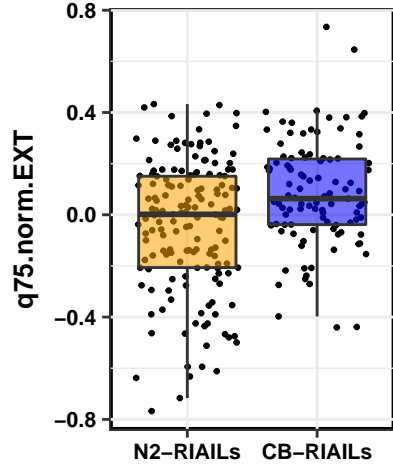

### A irinotecan.q75.TOF

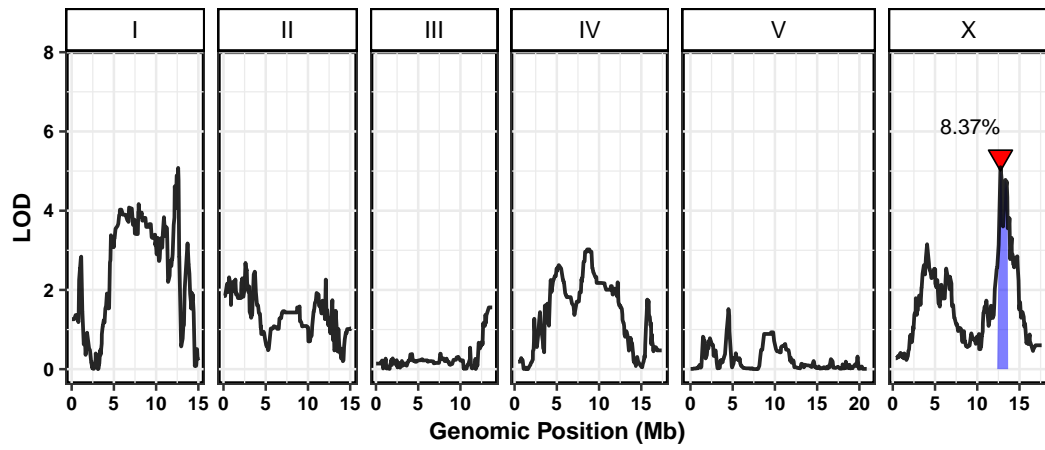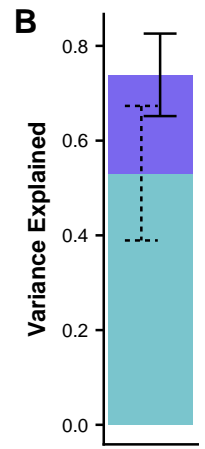

### C X:12750794

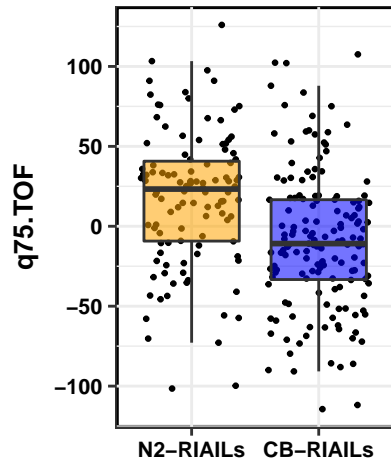



### A irinotecan.q90.EXT

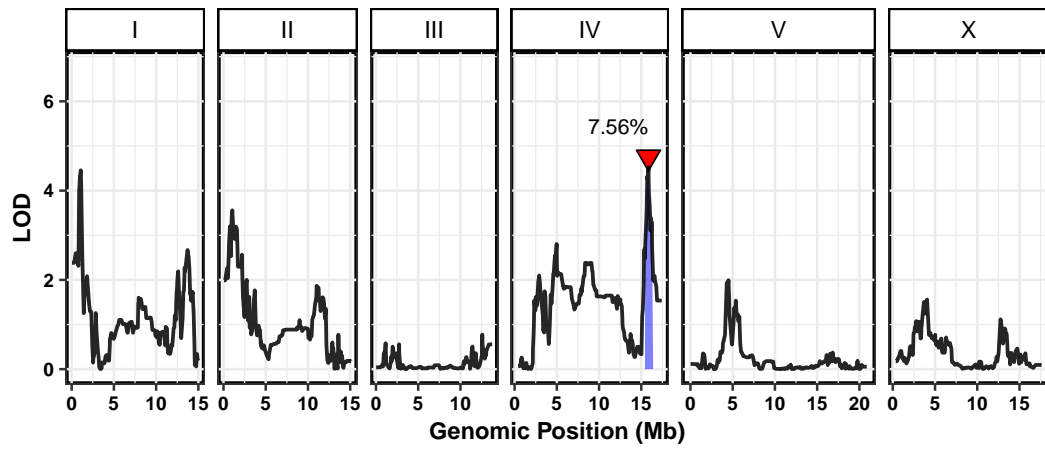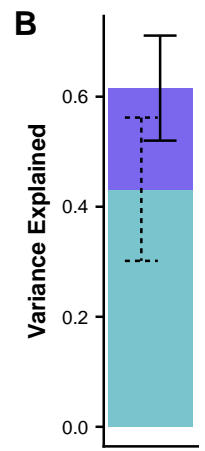

### C IV:15849940

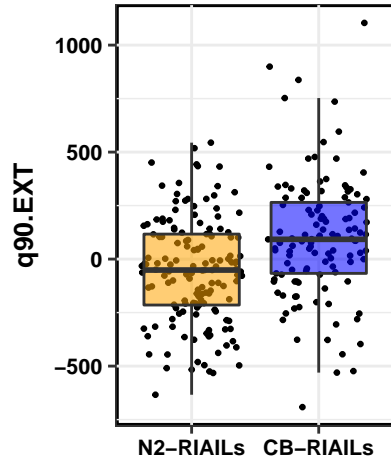

### NIL

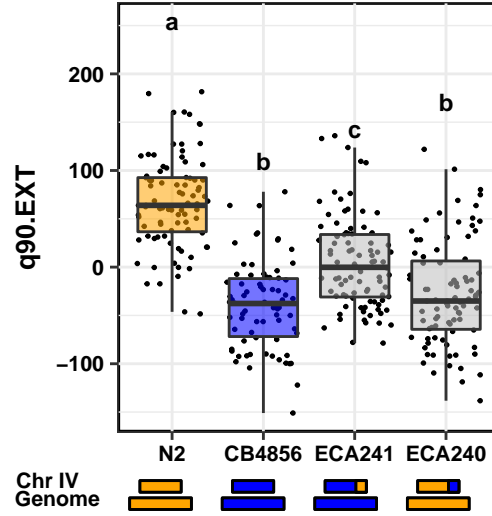

### A irinotecan.q90.norm.EXT

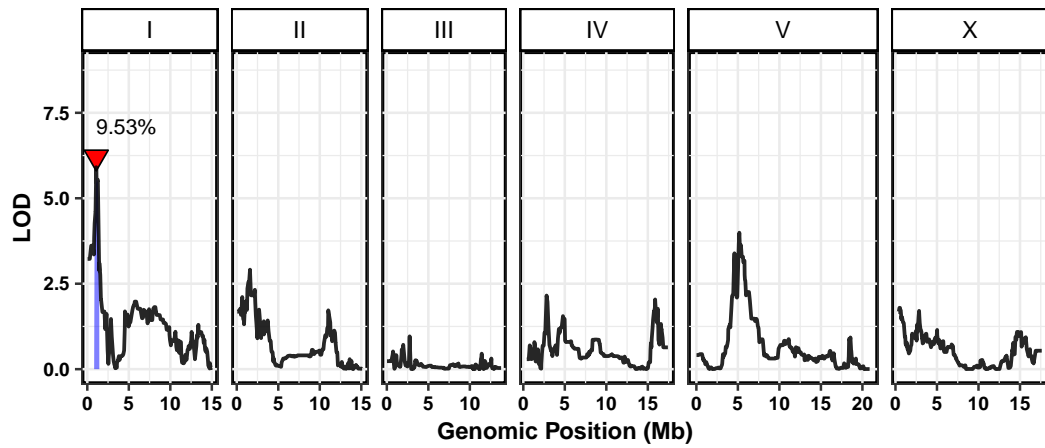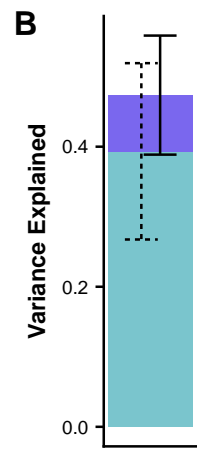

### C I:1079163

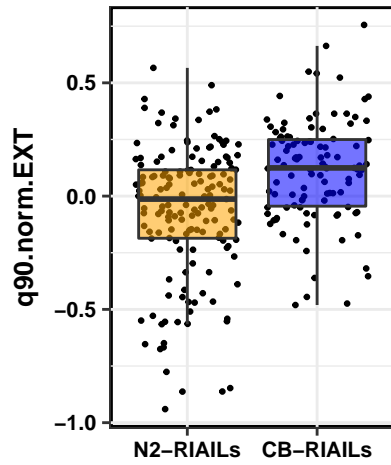

**A** irinotecan.q90.TOF

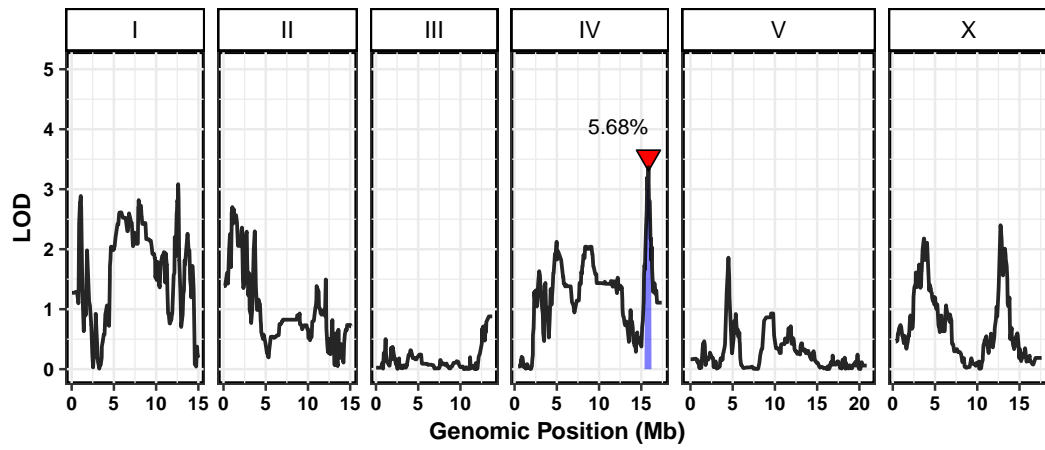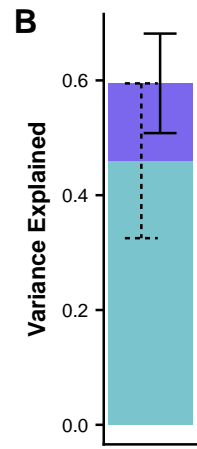

**C**

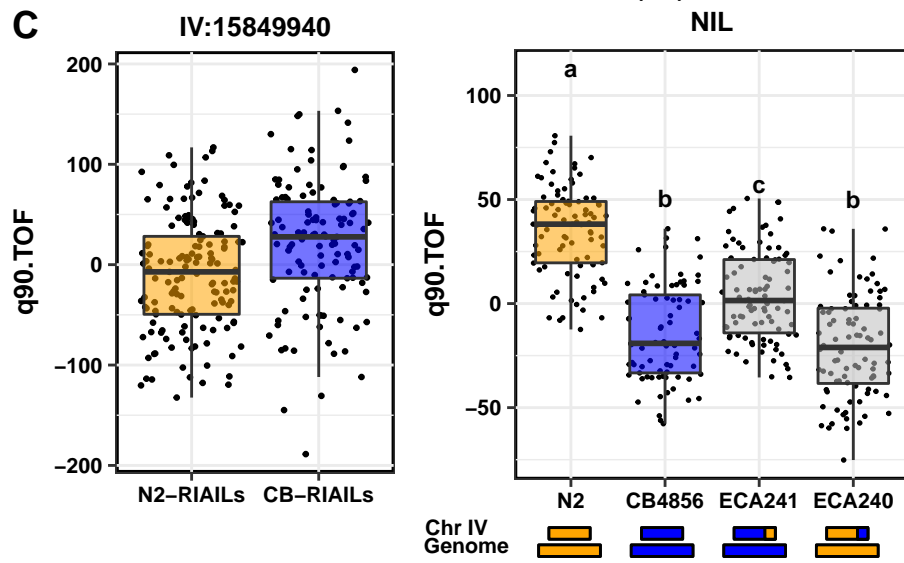

### A irinotecan.var.EXT

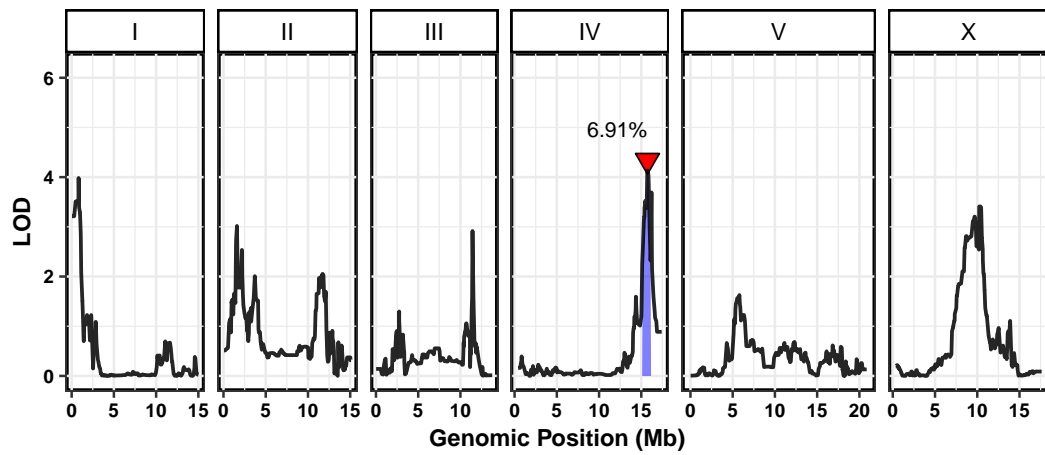

### B

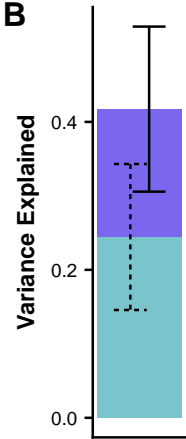

### C

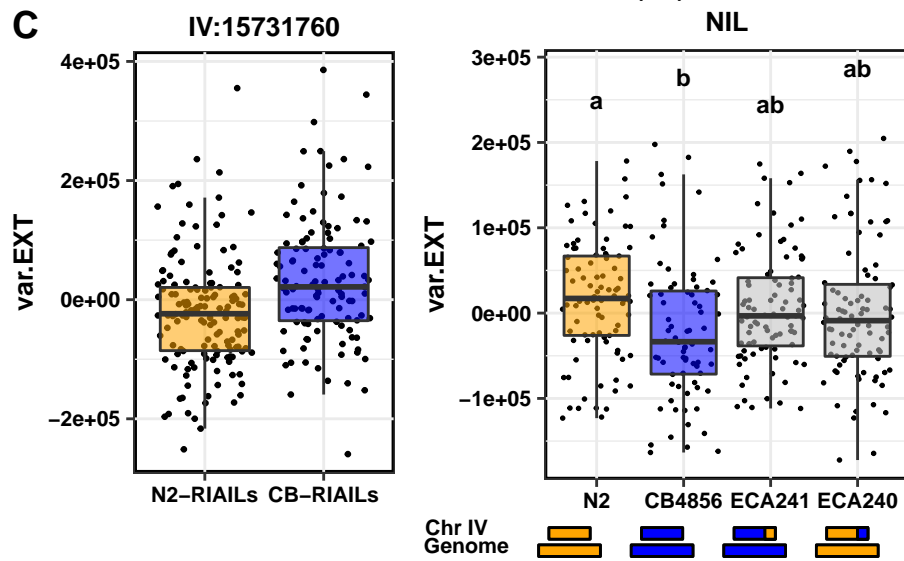

**A** irinotecan.var.TOF

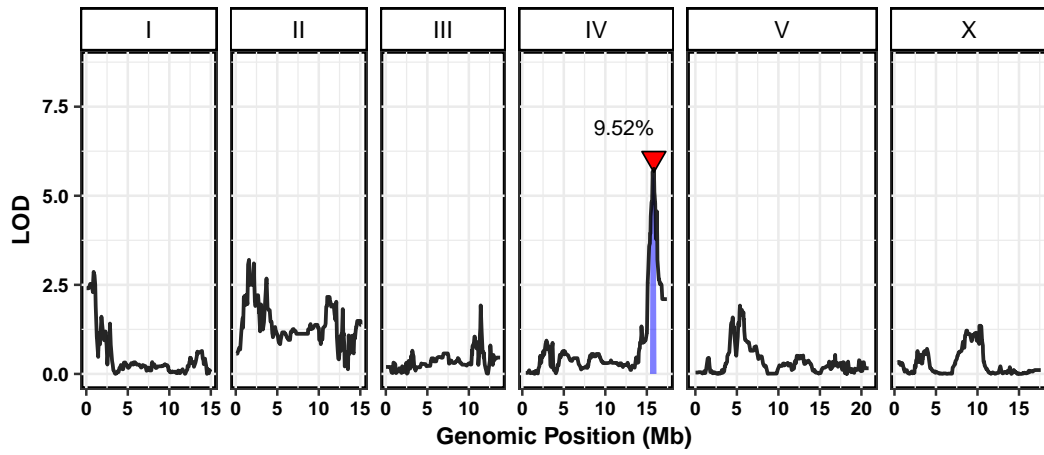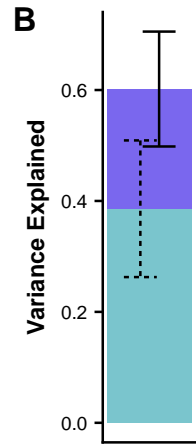

**C** IV:15849940

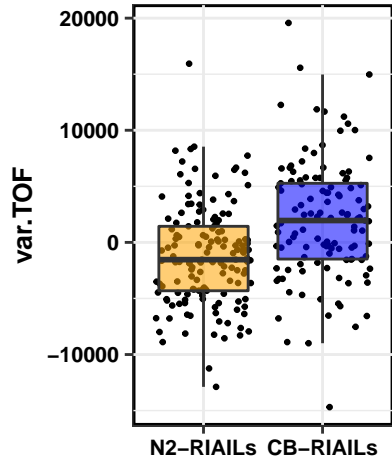

NIL

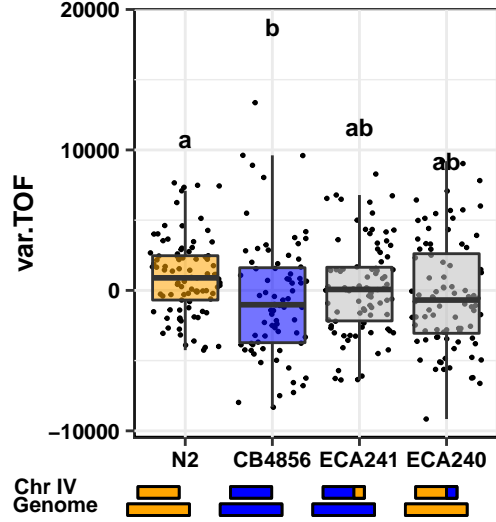

**A** mechlorethamine.median.TOF

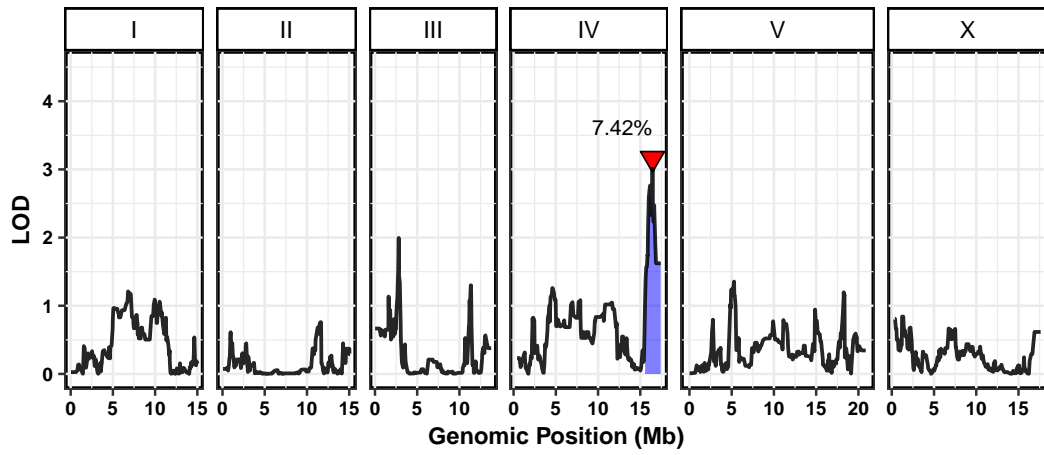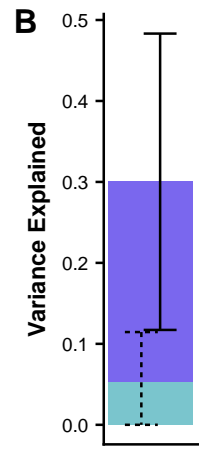

**C**

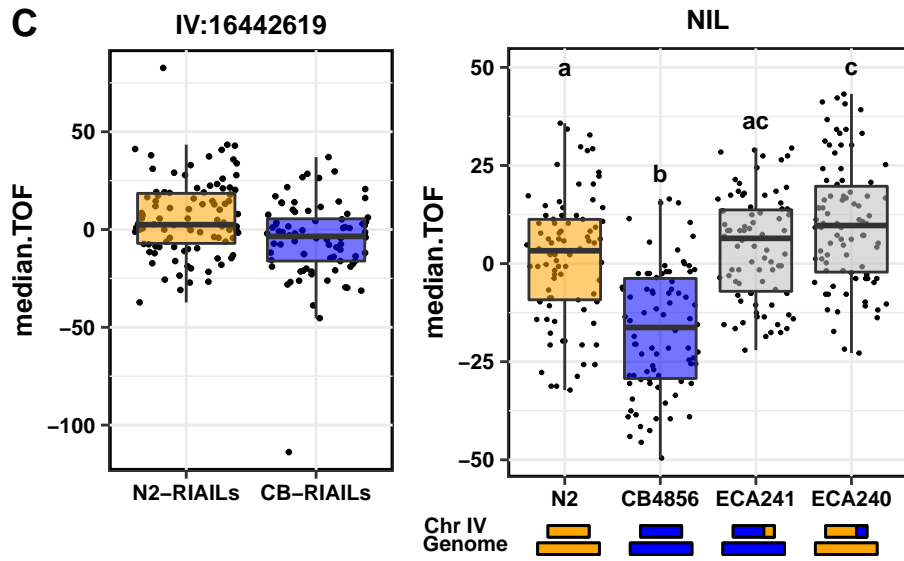

**A** mechlorethamine.n

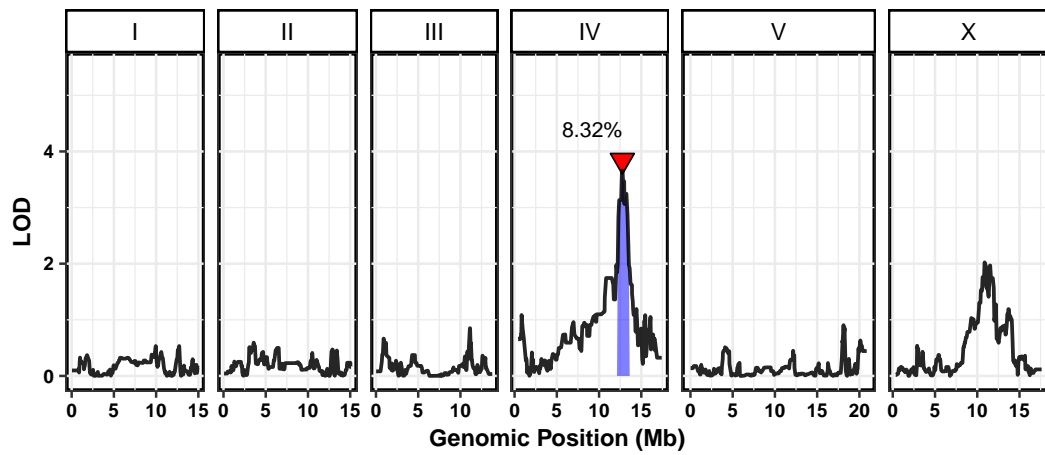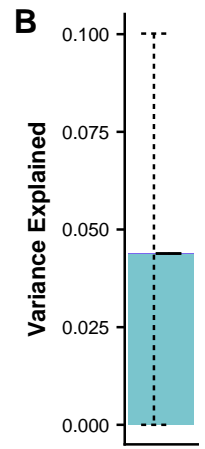

**C** IV:12758880

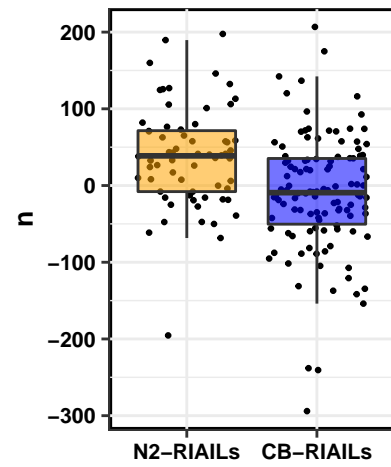

NIL

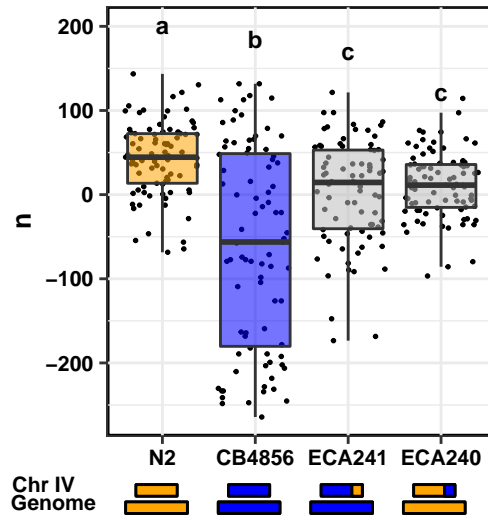

**A** mechlorethamine.norm.n

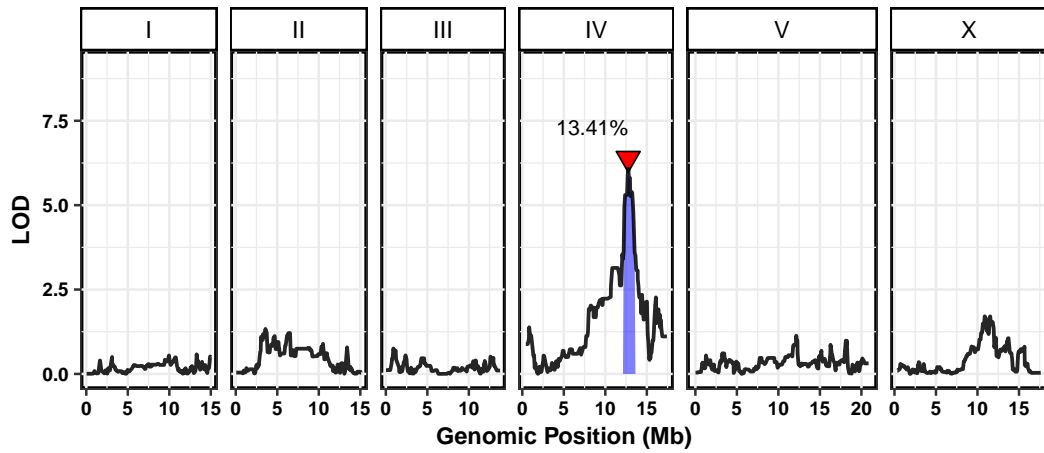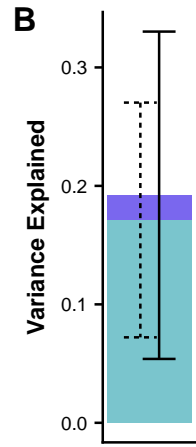

**C**

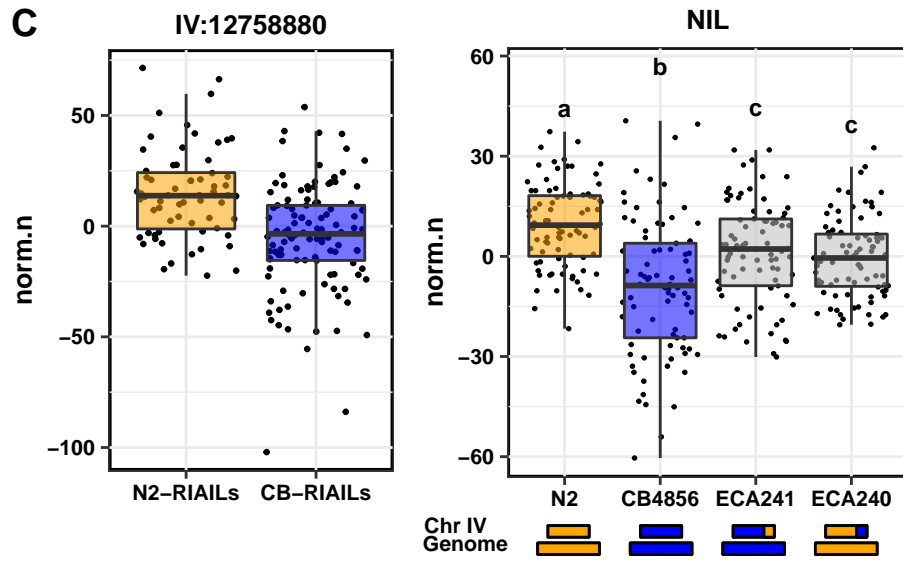



### A mechlorethamine.q25.EXT

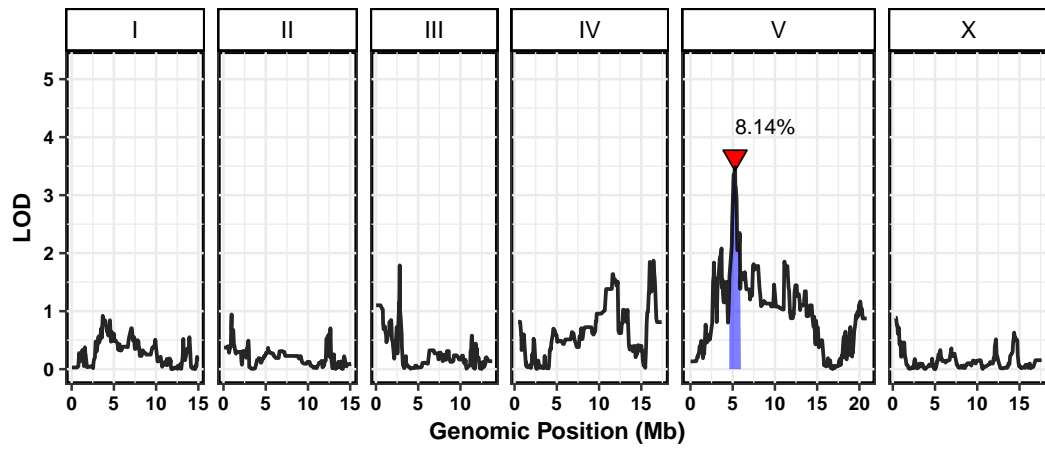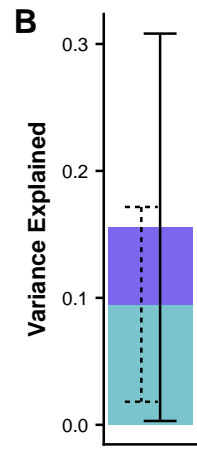

### C

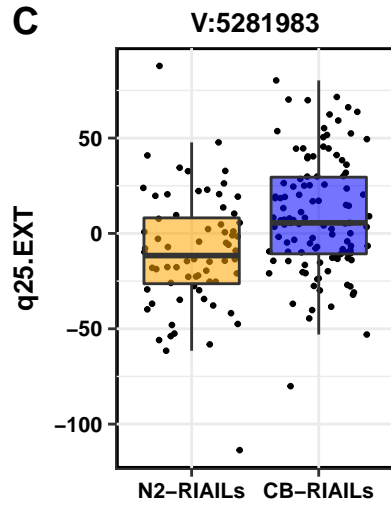

**A** mechlorethamine.q25.TOF

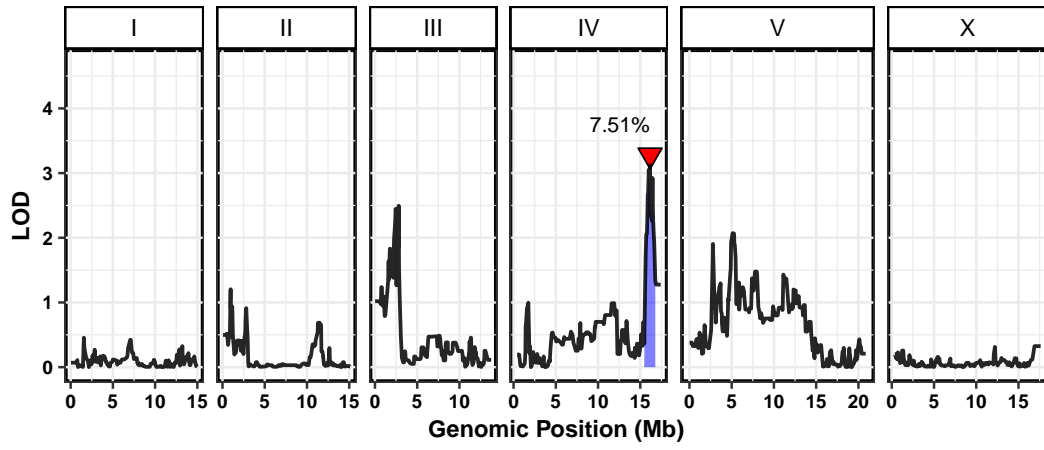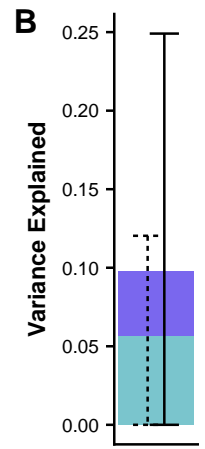

**C**

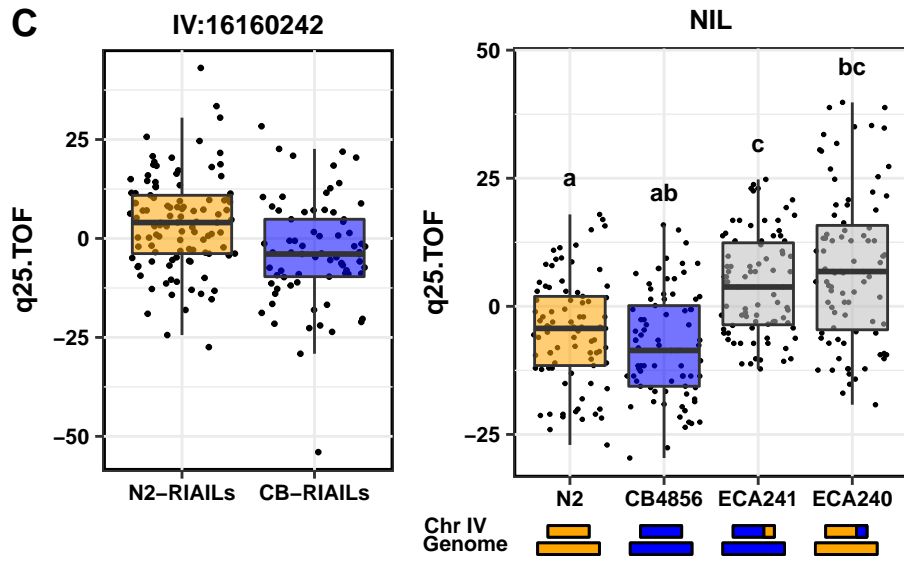

**A paraquat.mean.EXT**

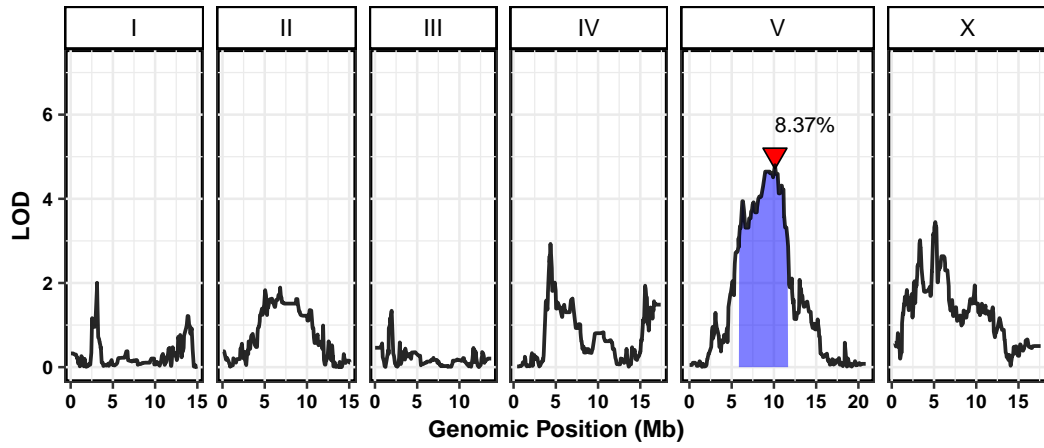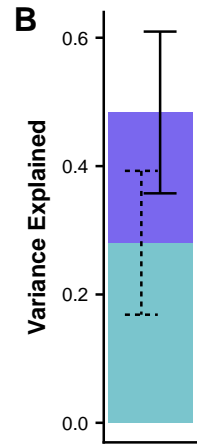

**C**

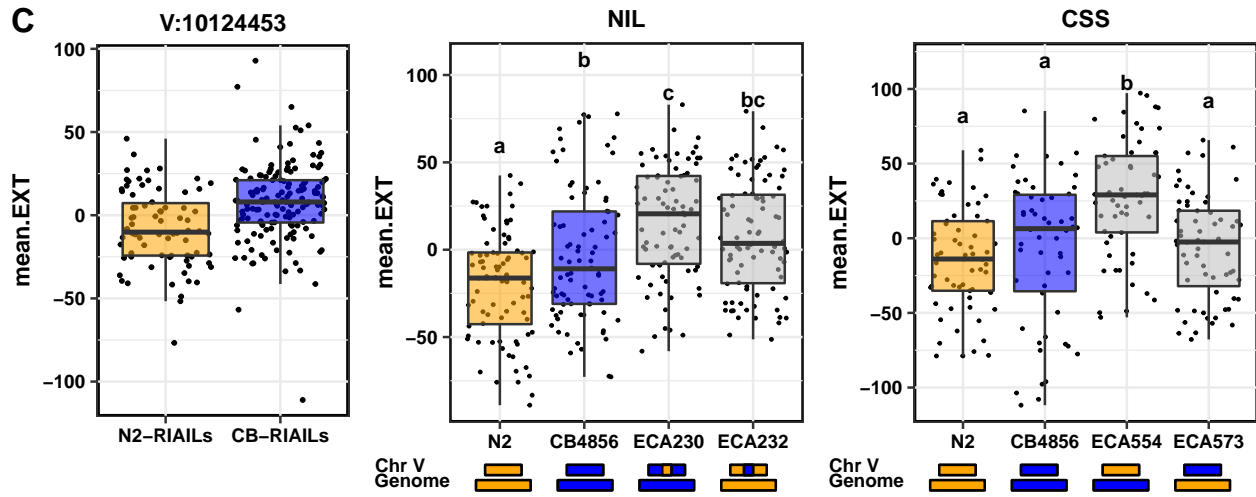

**A paraquat.mean.TOF**

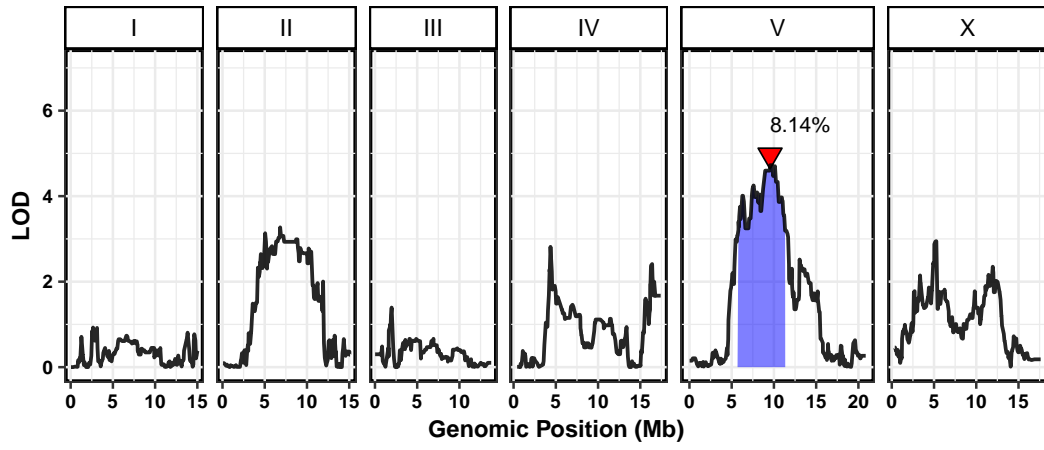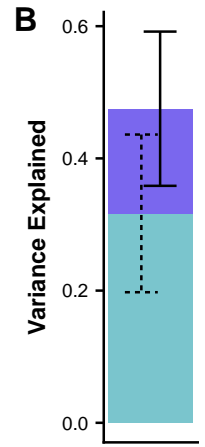

**C**

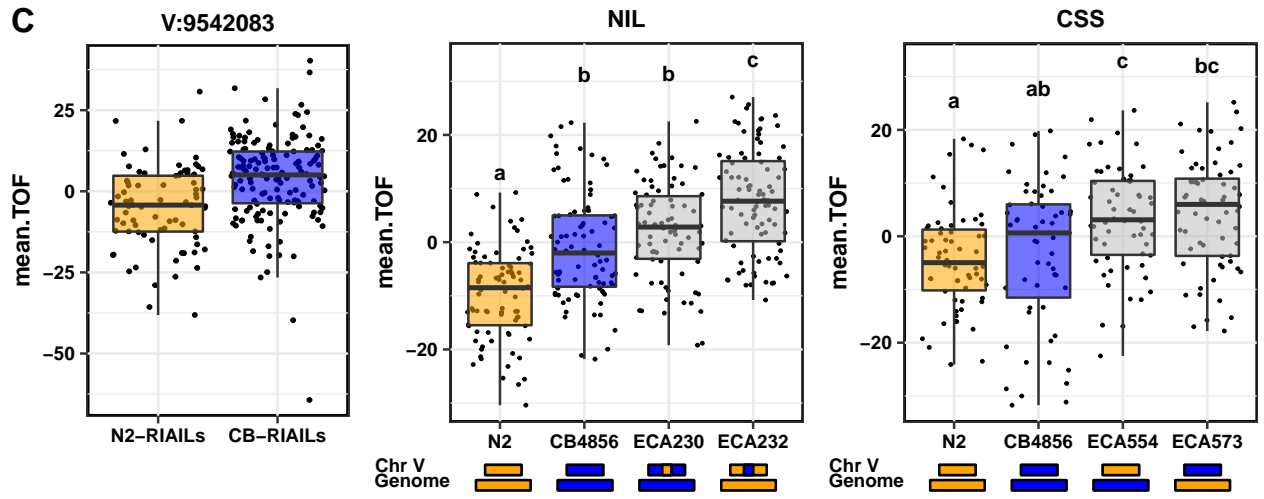

**A paraquat.median.EXT**

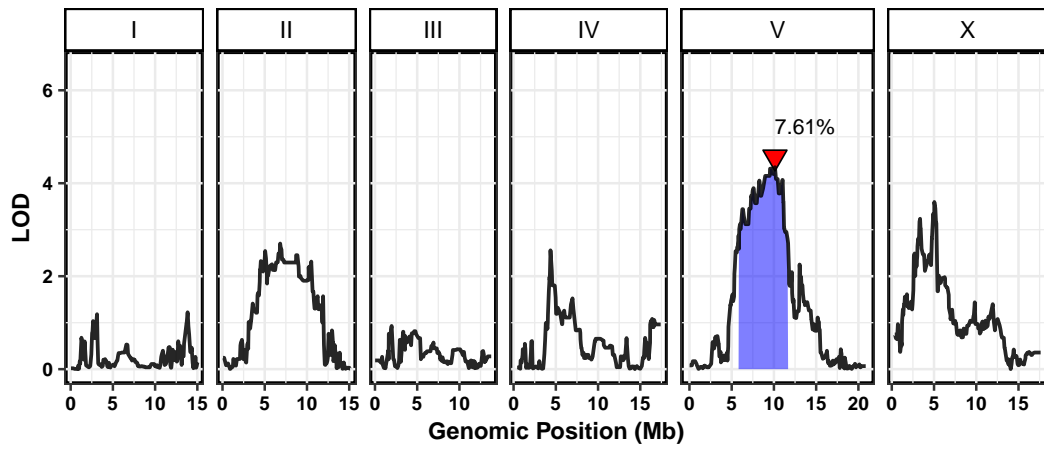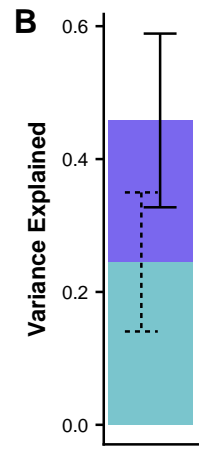

**C**

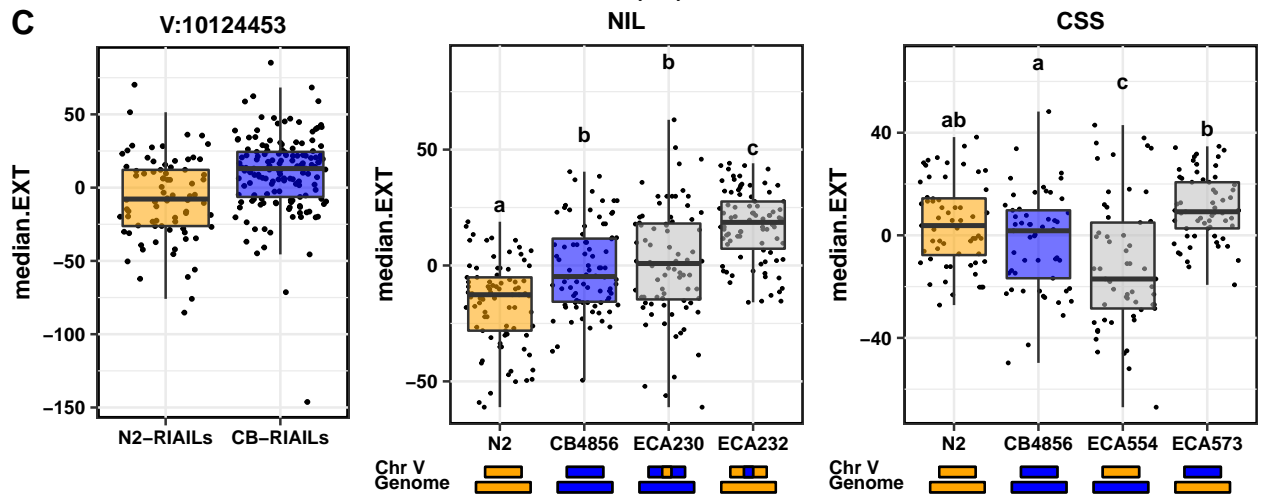

**A paraquat.median.TOF**

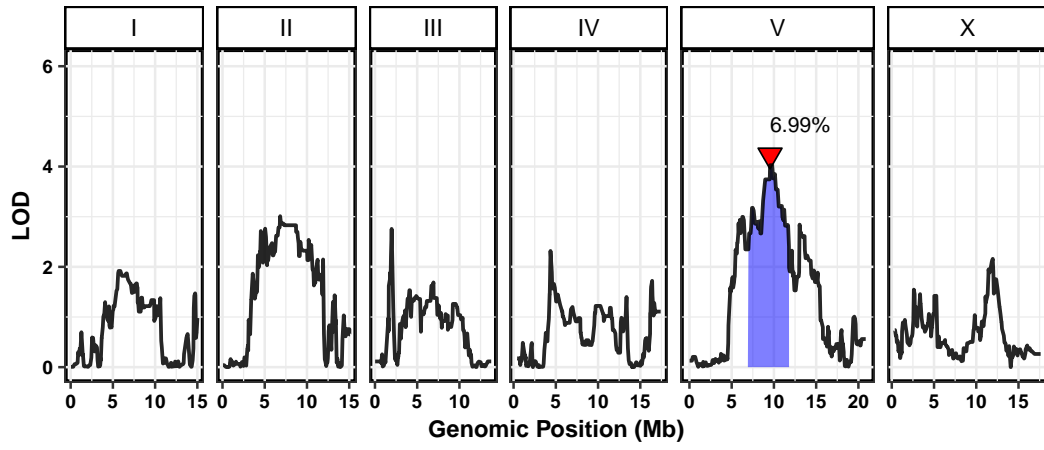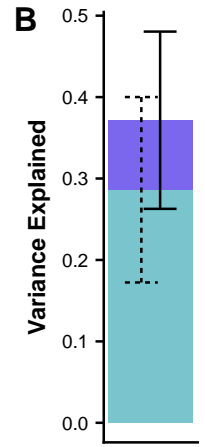

**C V:9542083**

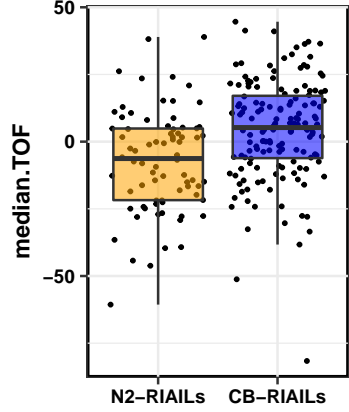

**NIL**

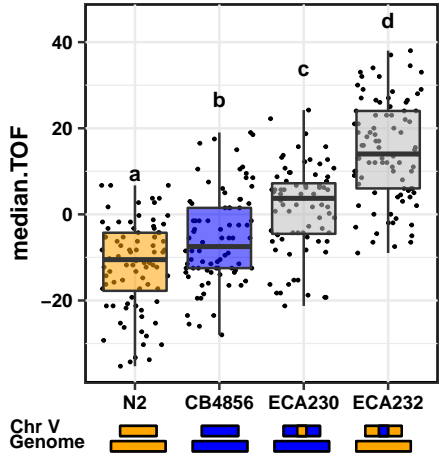

**CSS**

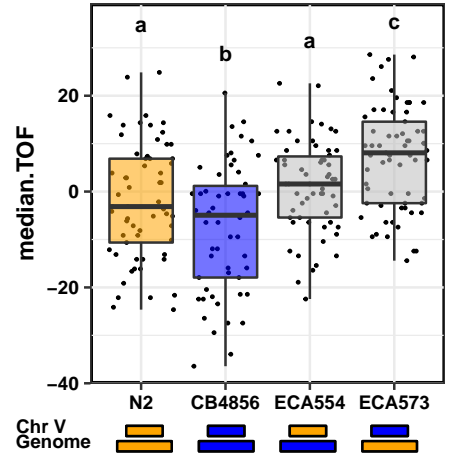

**A paraquat.norm.n**

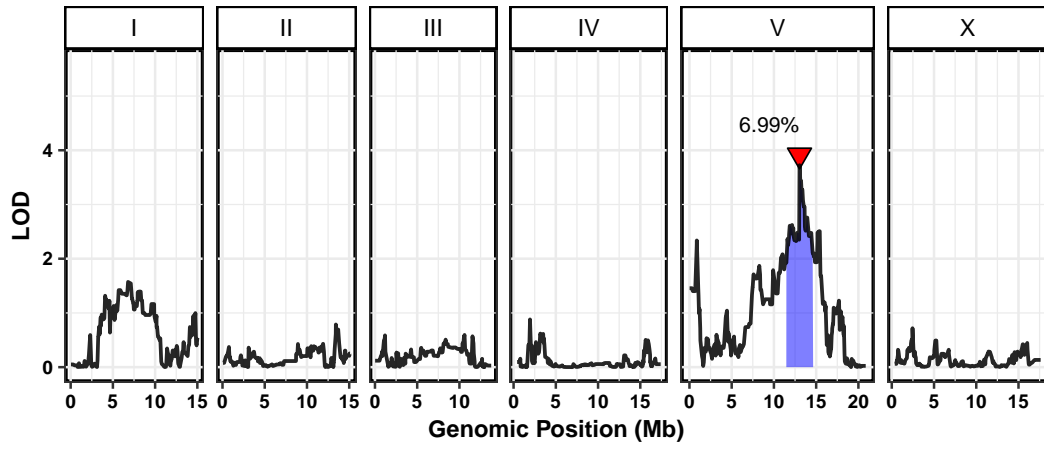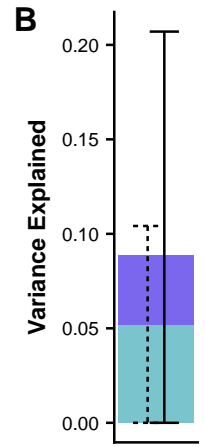

**C**

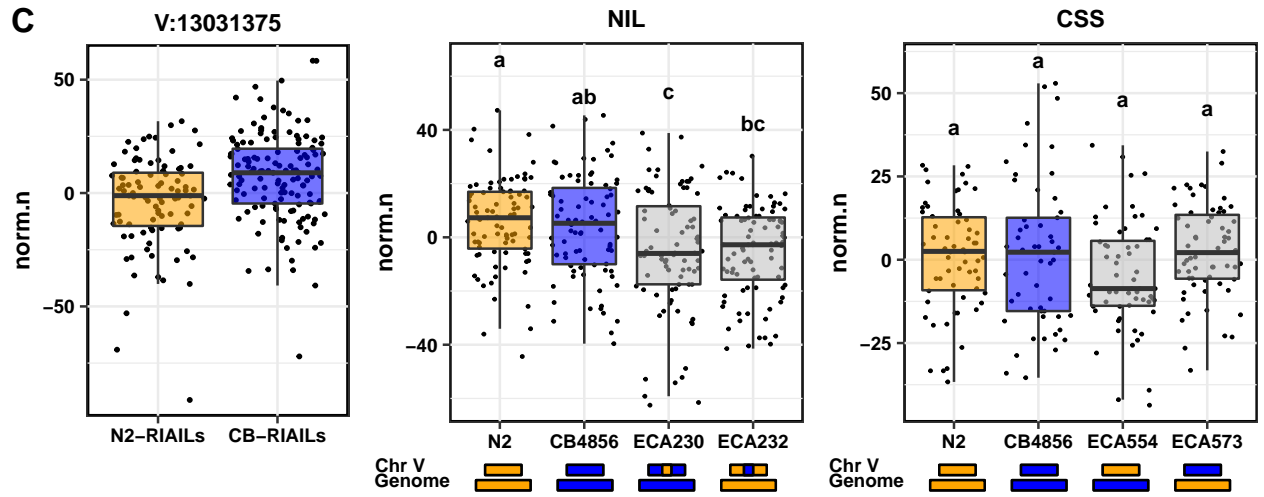

**A** paraquat.q10.EXT

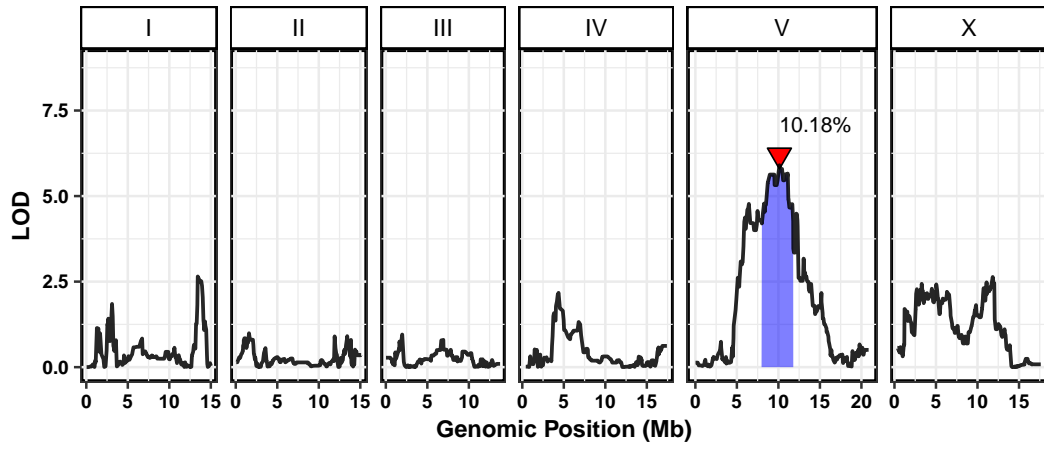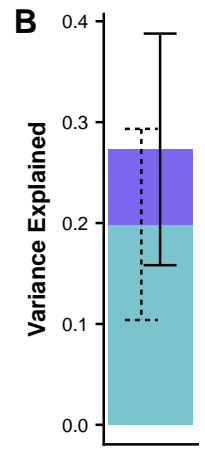

**C** V:10124453

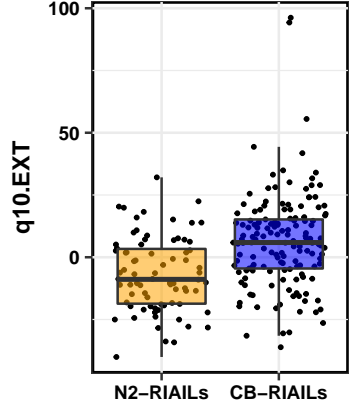

NIL

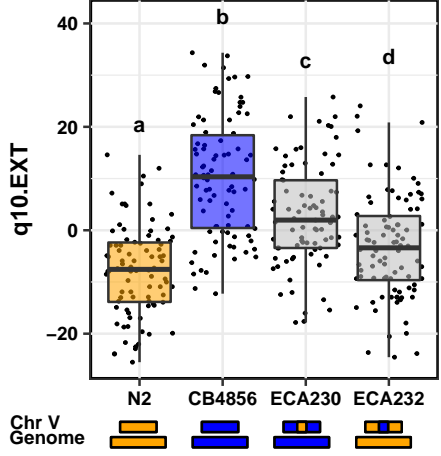

CSS

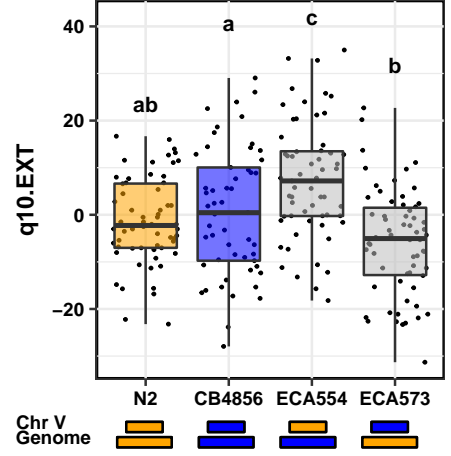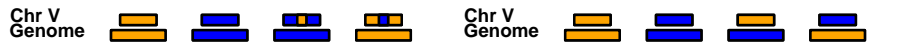



### A paraquat.q10.norm.EXT

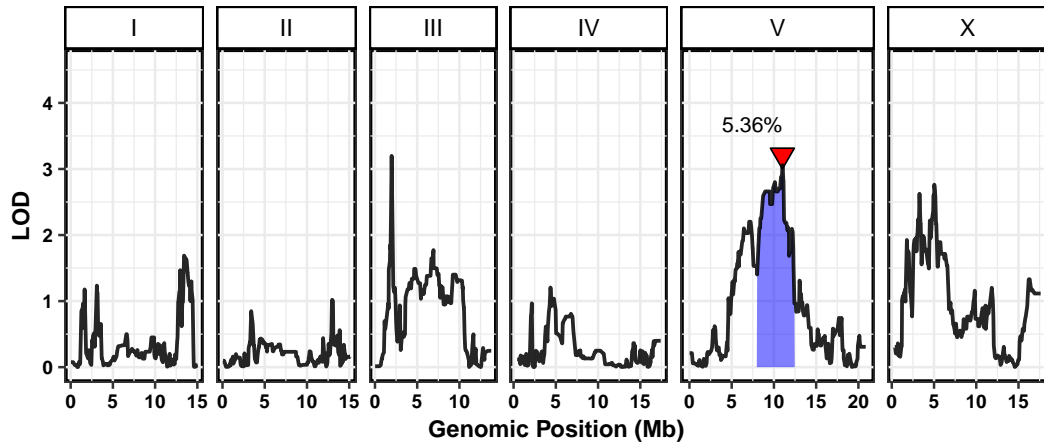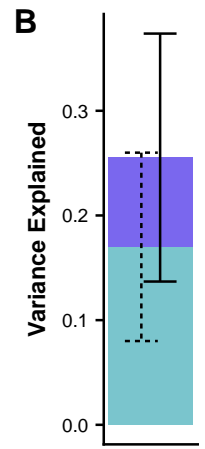

### C

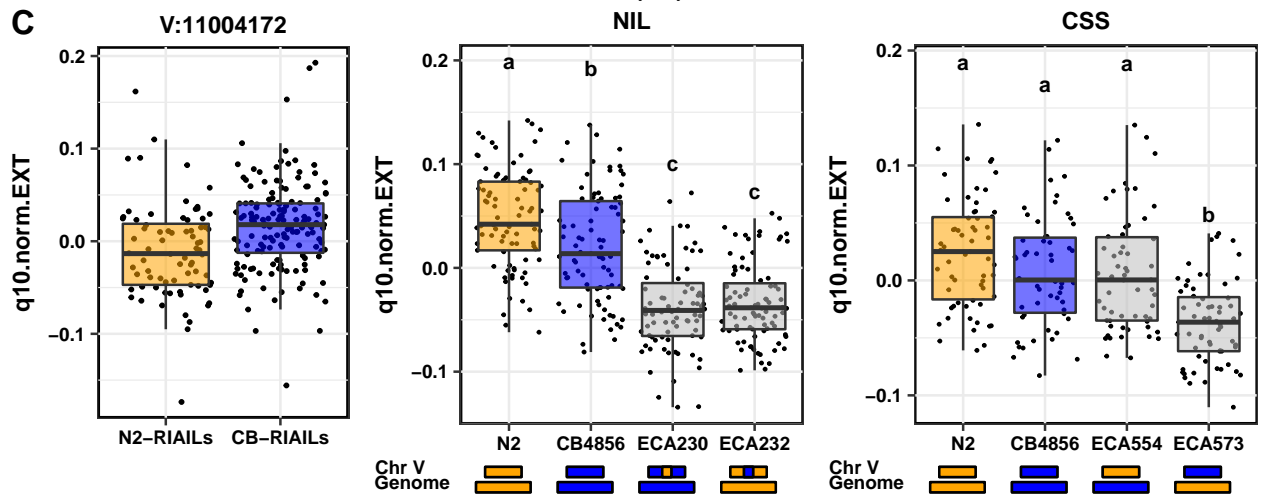

**A paraquat.q10.TOF**

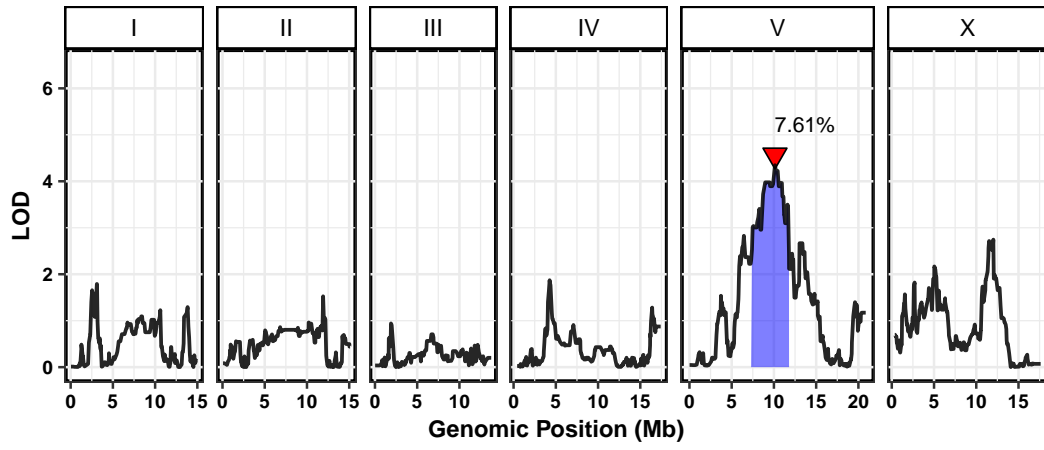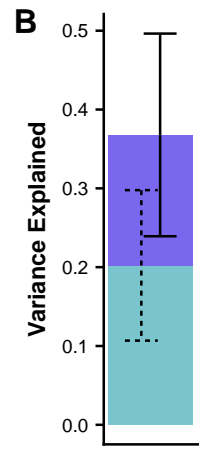

**C**

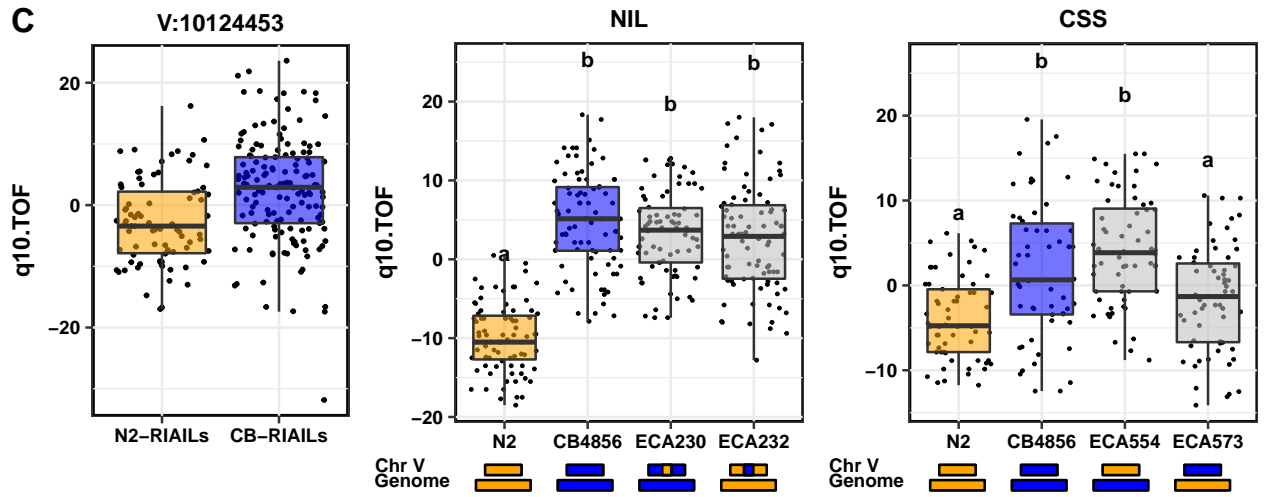

**A** paraquat.q25.EXT

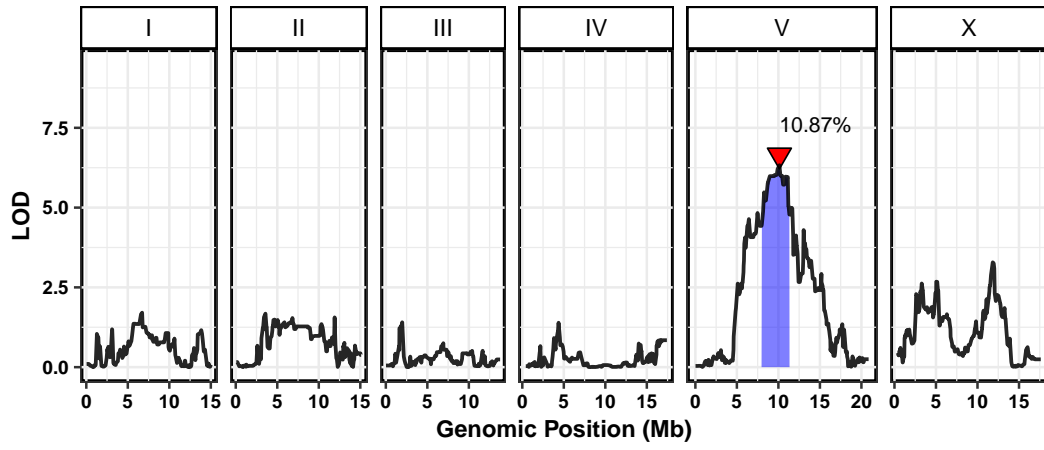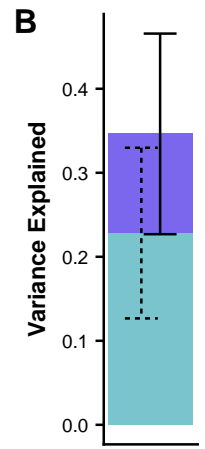

**C** V:10124453

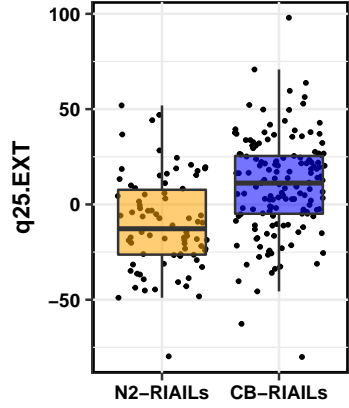

NIL

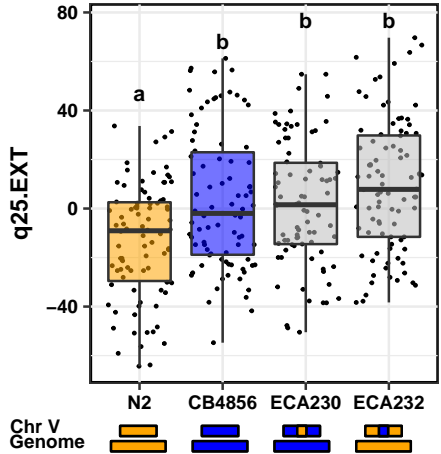

CSS

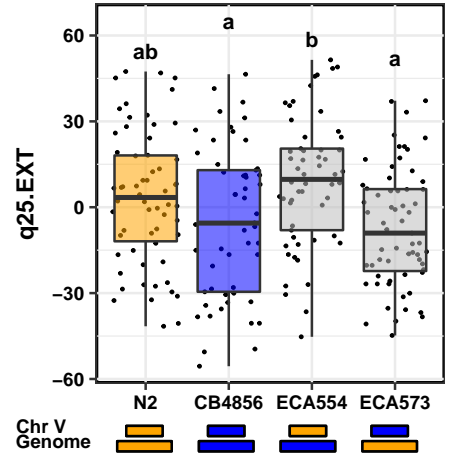

### A paraquat.q25.norm.EXT

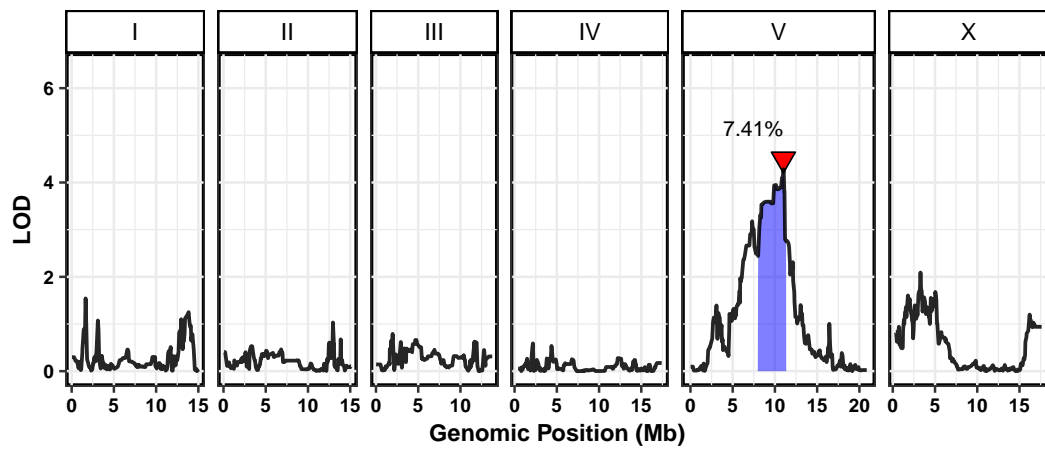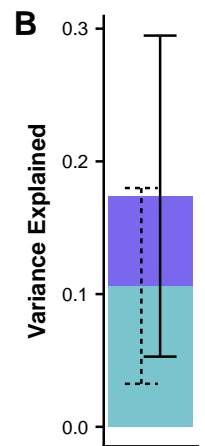

### C

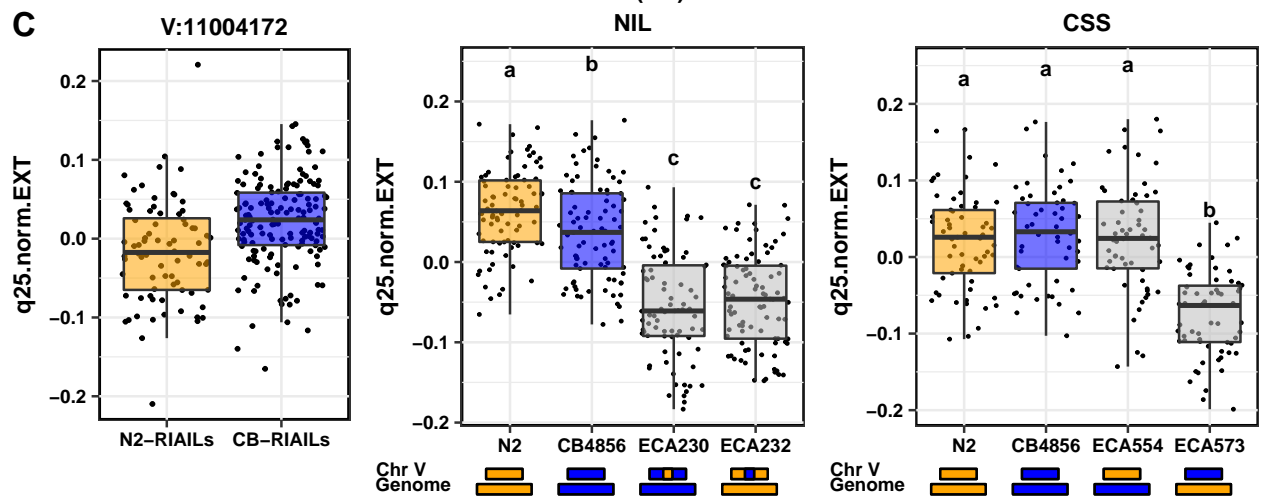

**A paraquat.q25.TOF**

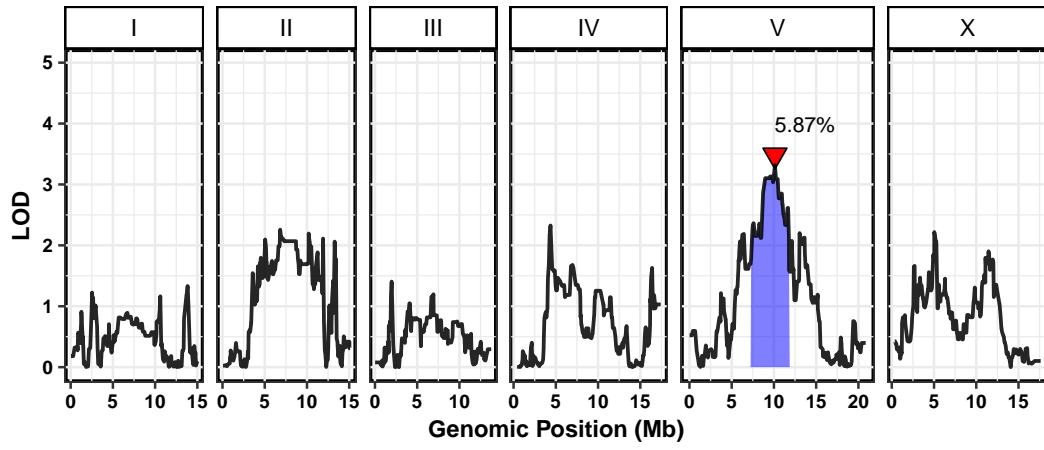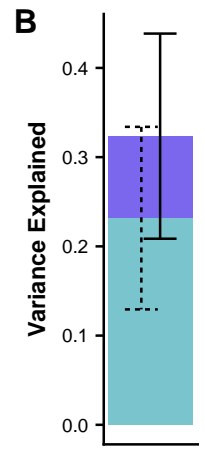

**C**

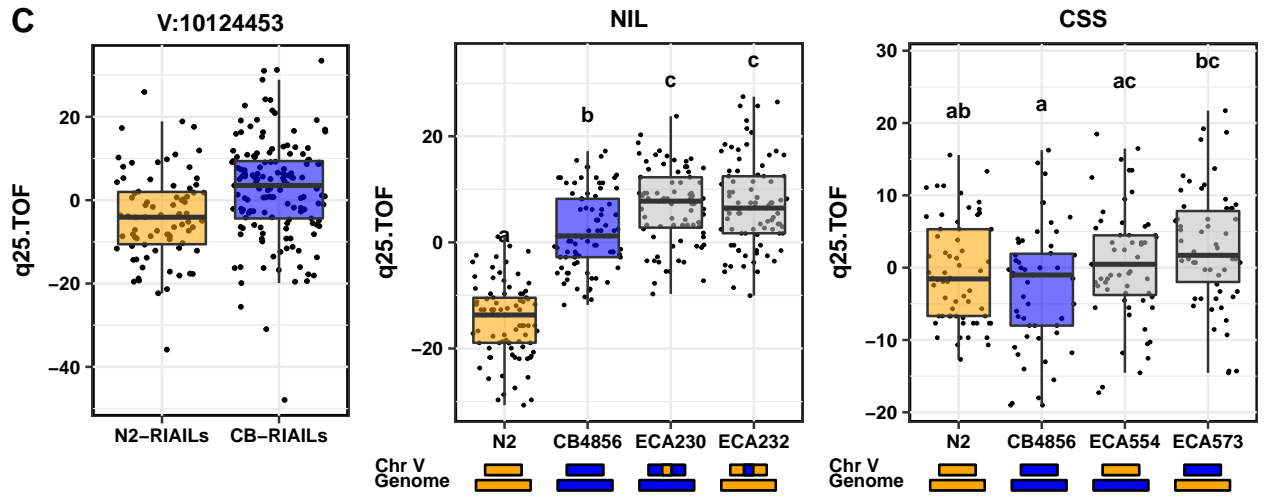

**A** paraquat.q75.EXT

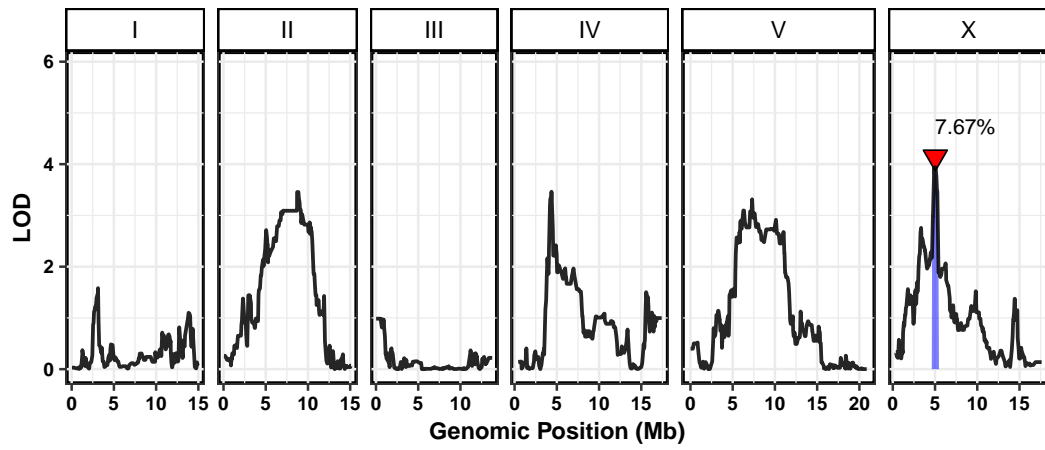

**B**

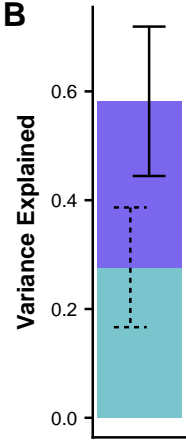

**C**

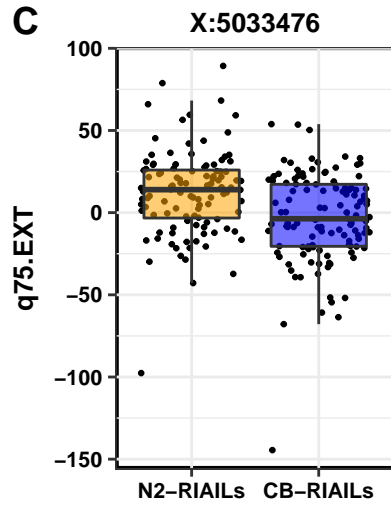

**A paraquat.q75.TOF**

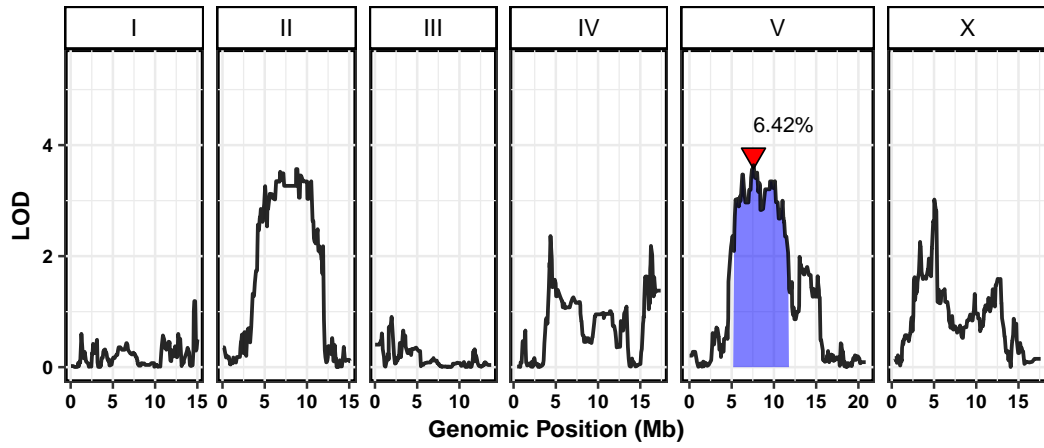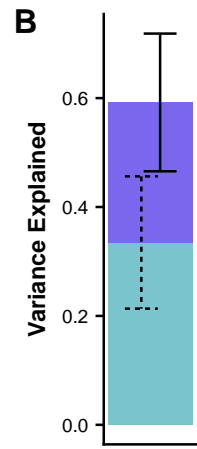

**C**

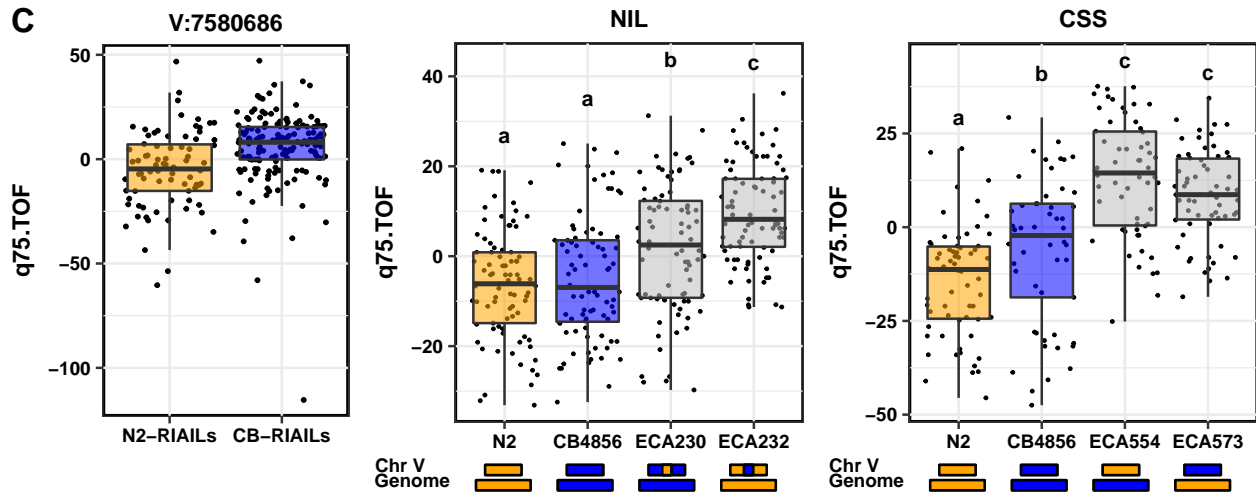

**A paraquat.q90.EXT**

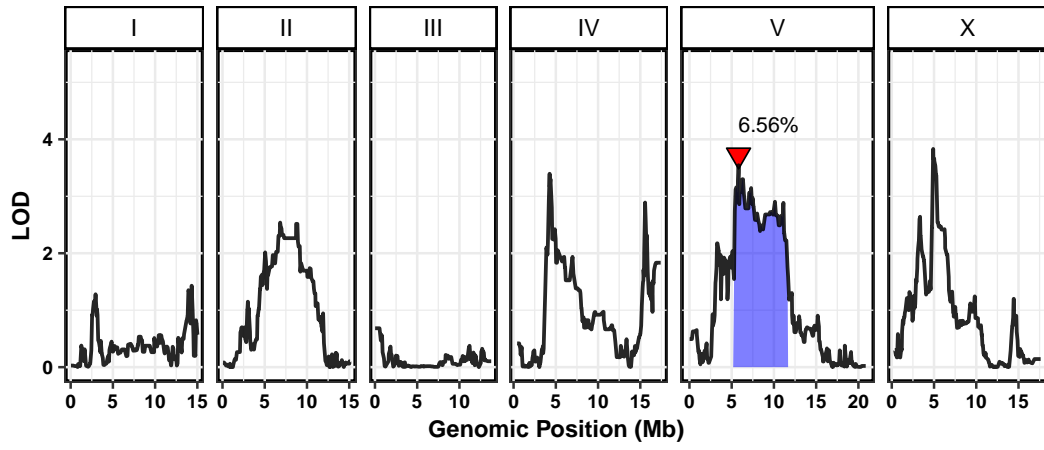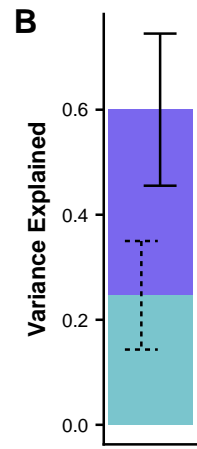

**C**

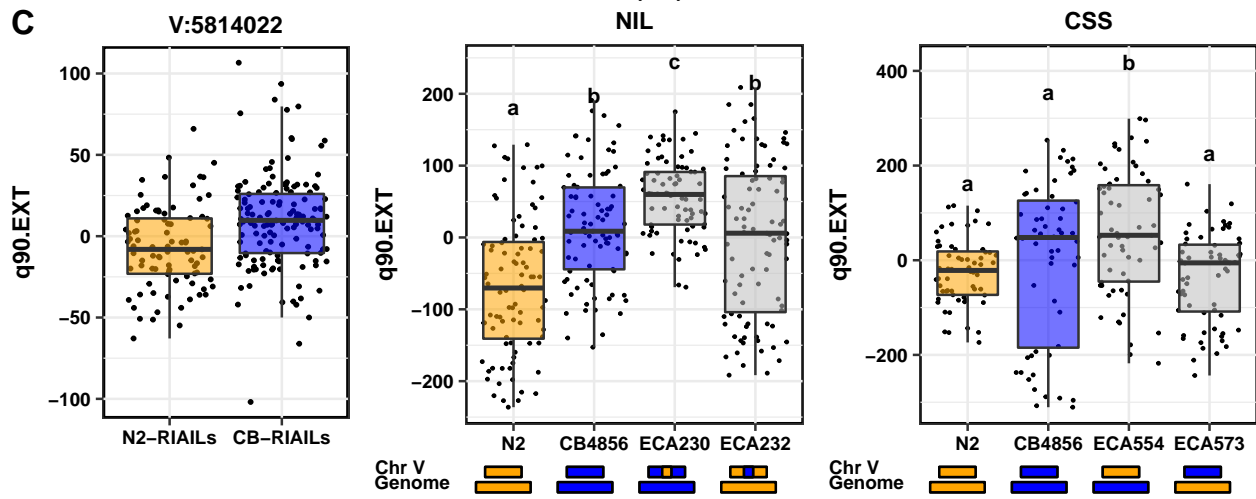



### A paraquat.q90.TOF

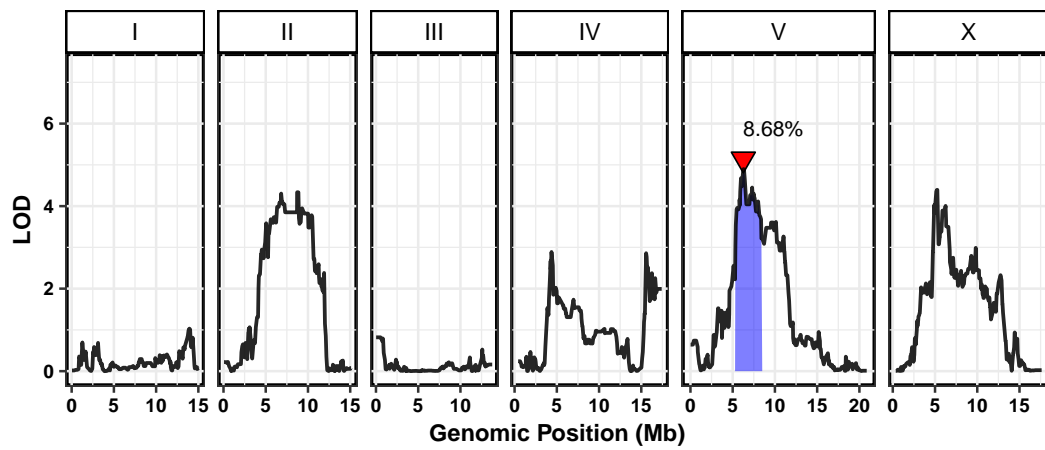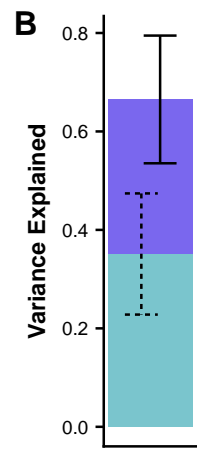

### C

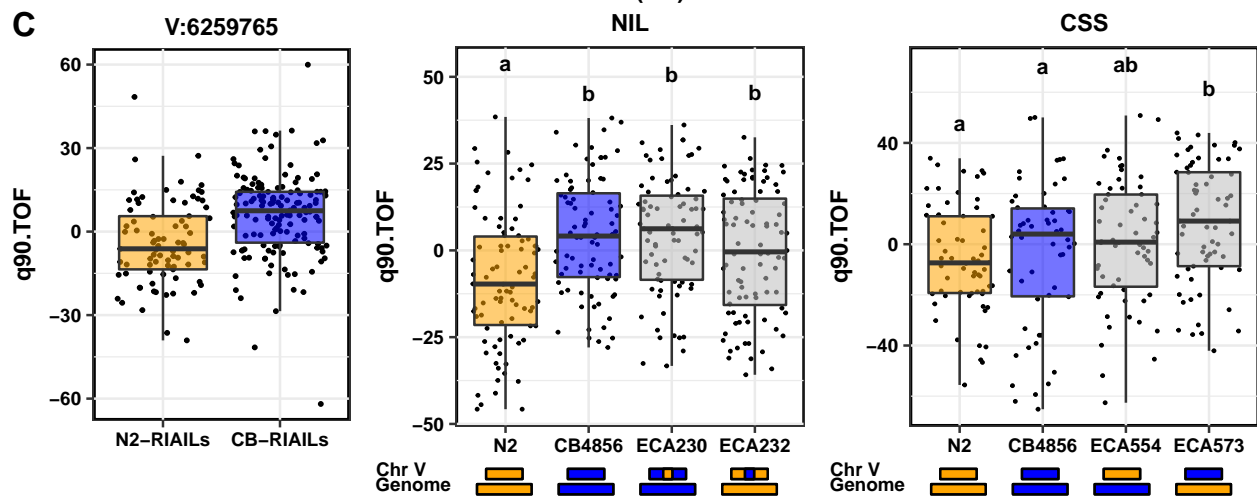

**A silver.cv.EXT**

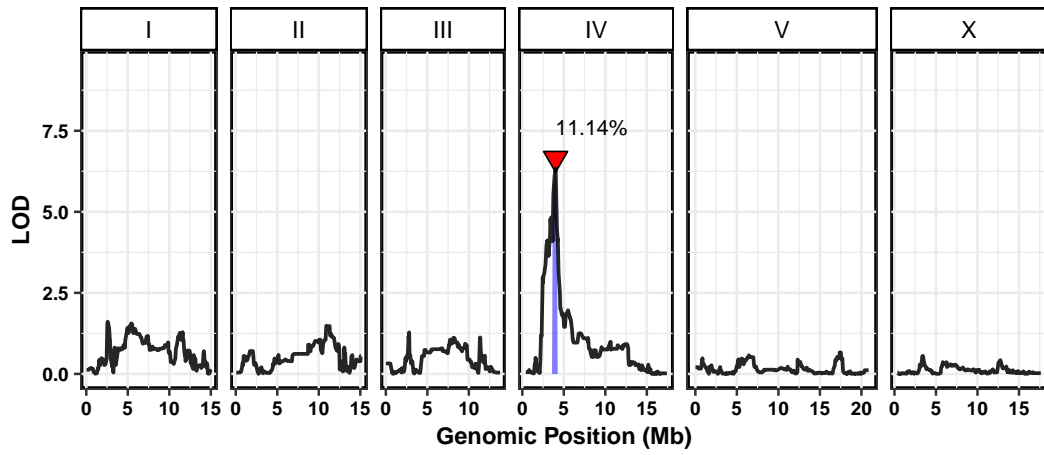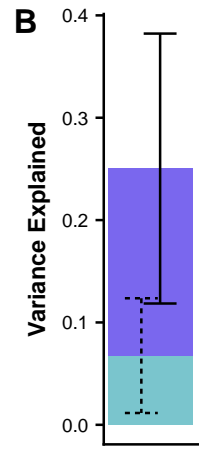

**C**

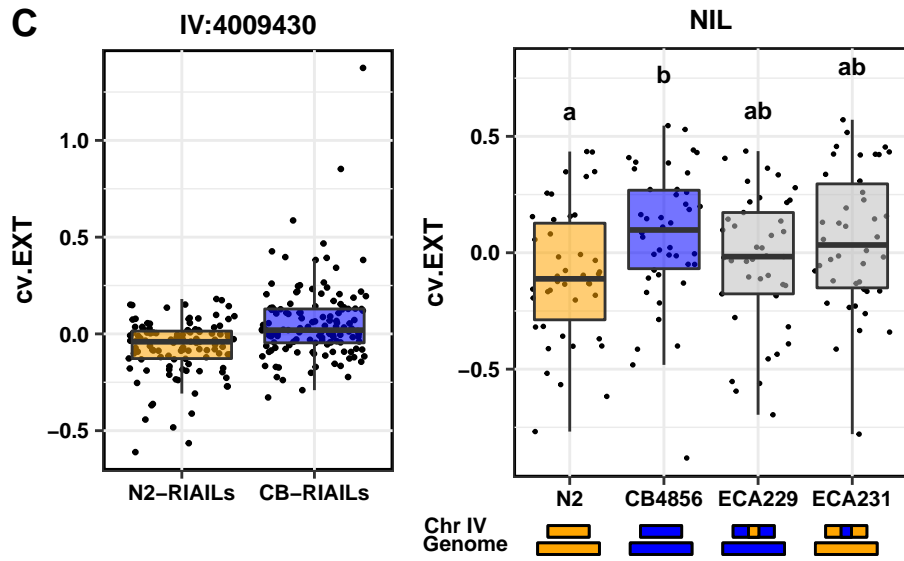

**A silver.mean.EXT**

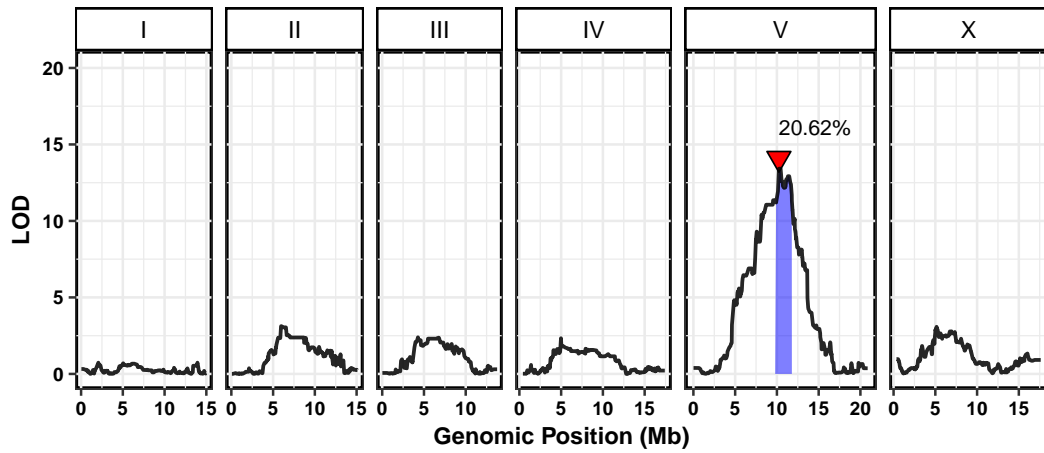

**B**

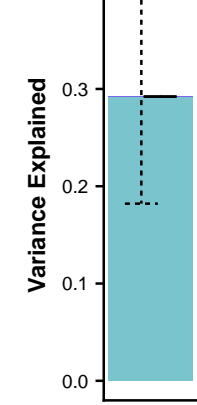

**C**

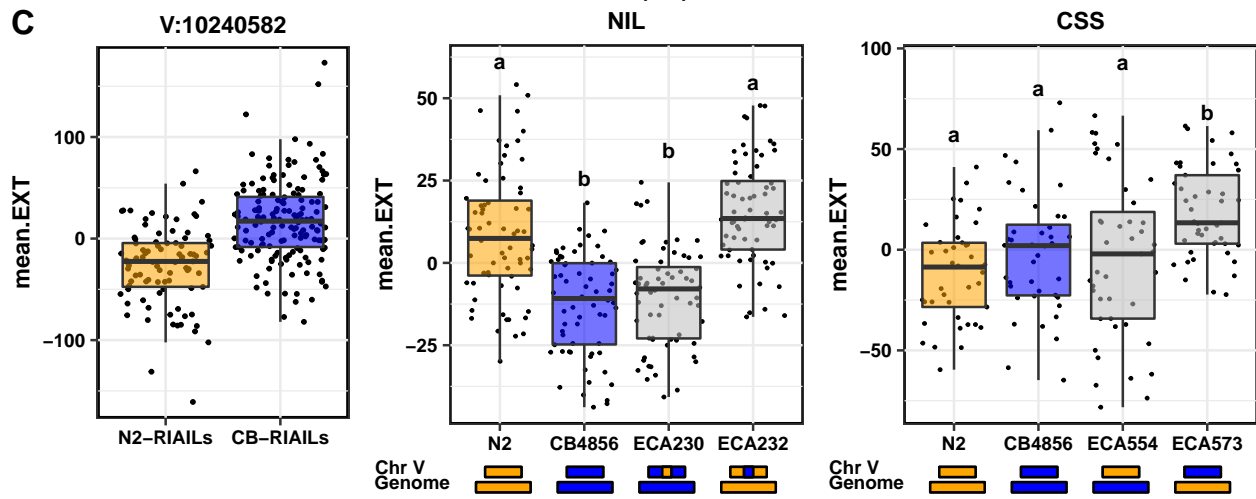

**A silver.mean.norm.EXT**

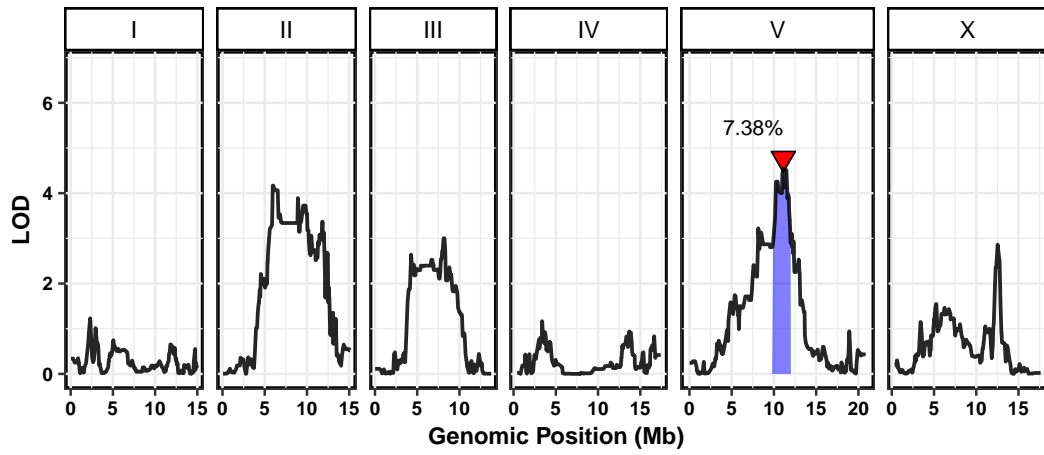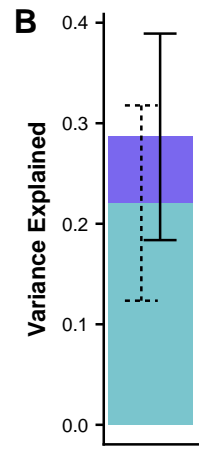

**C**

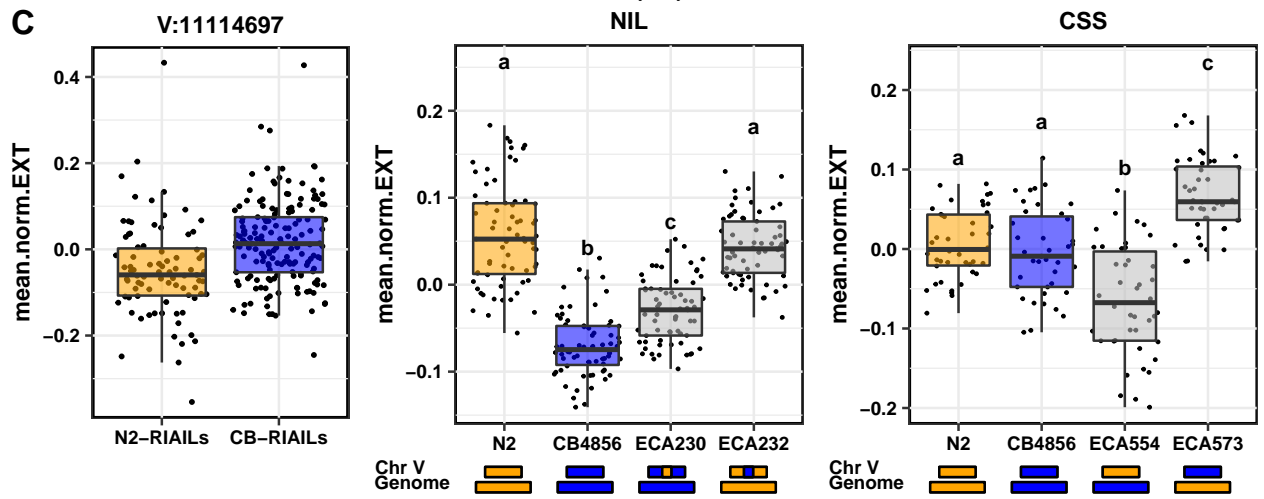

**A silver.mean.TOF**

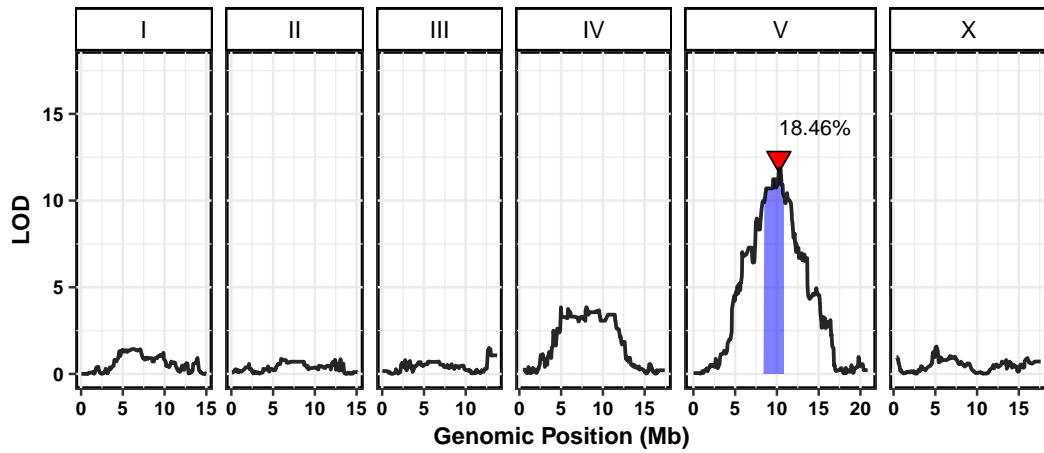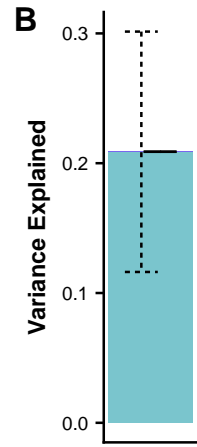

**C**

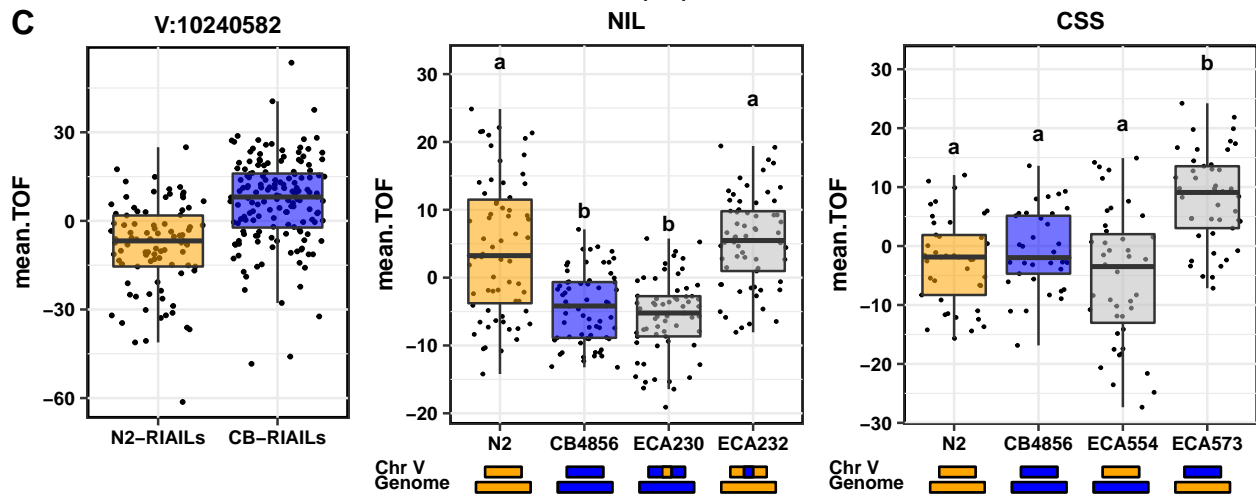

**A silver.median.EXT**

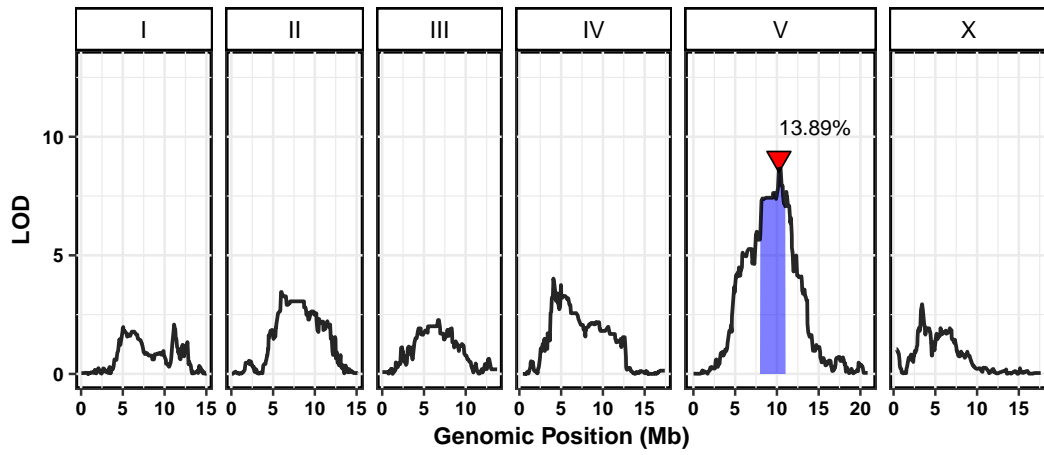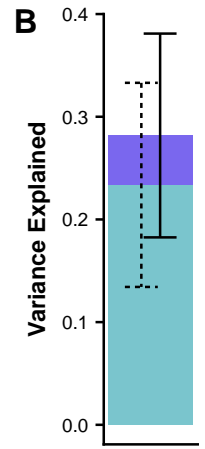

**C**

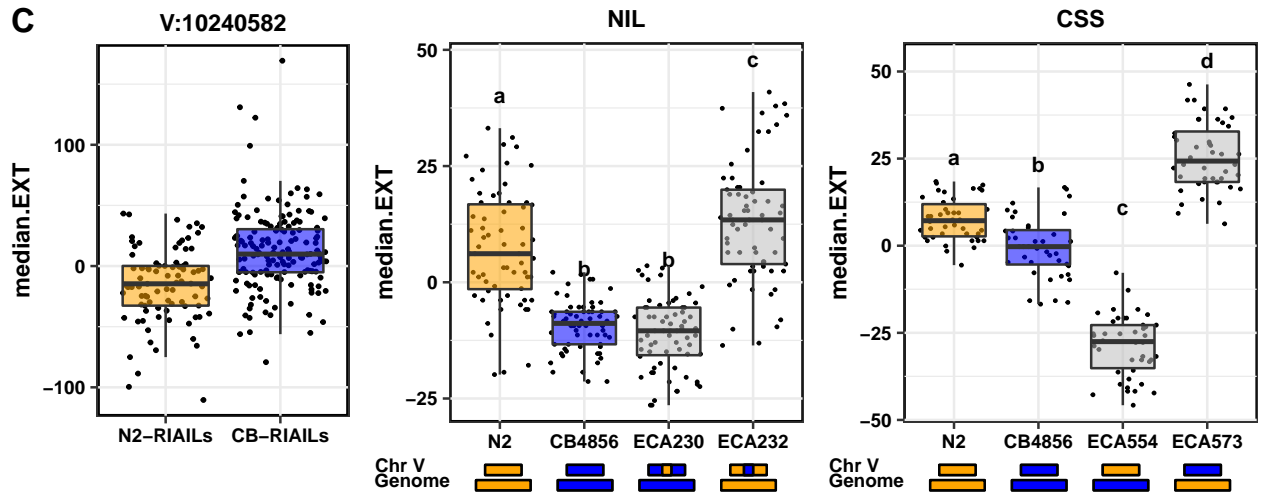

**A silver.median.norm.EXT**

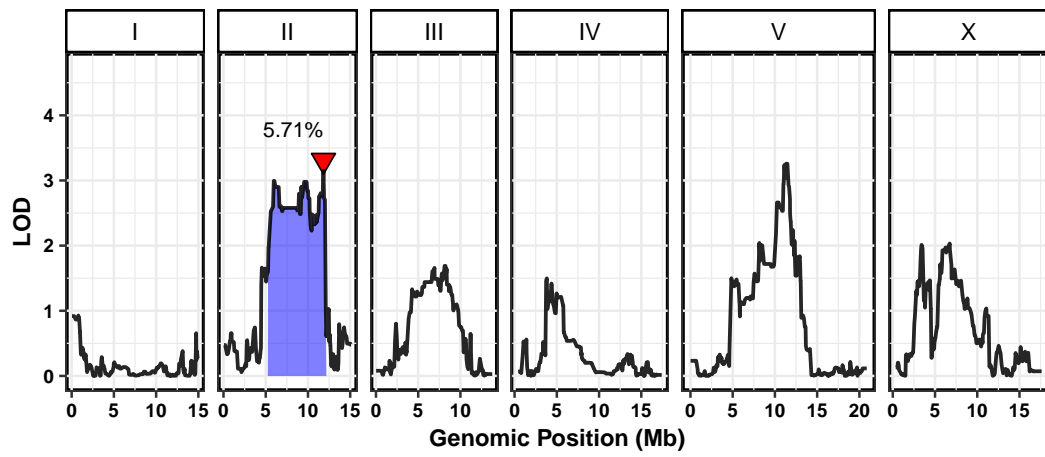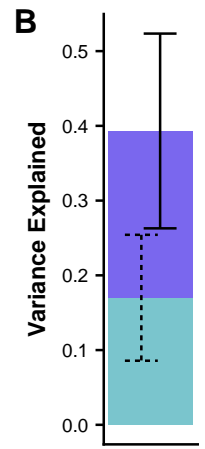

**C II:11833729**

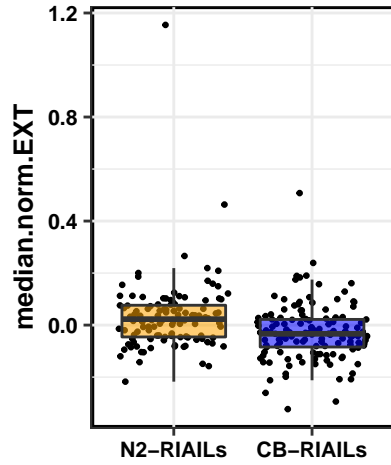

**A silver.median.TOF**

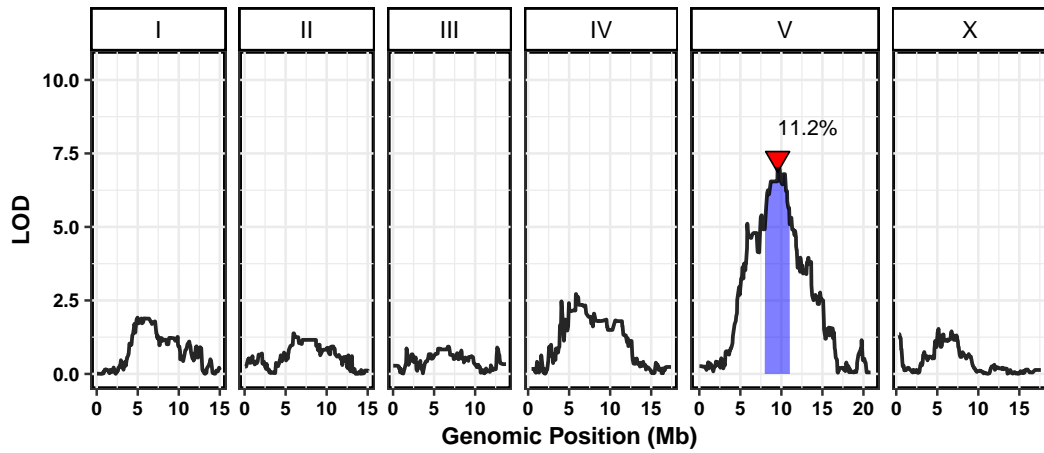

**B**

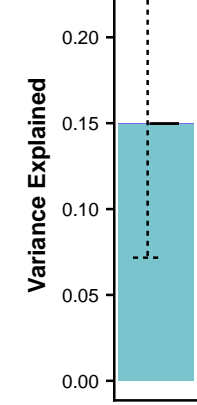

**C**

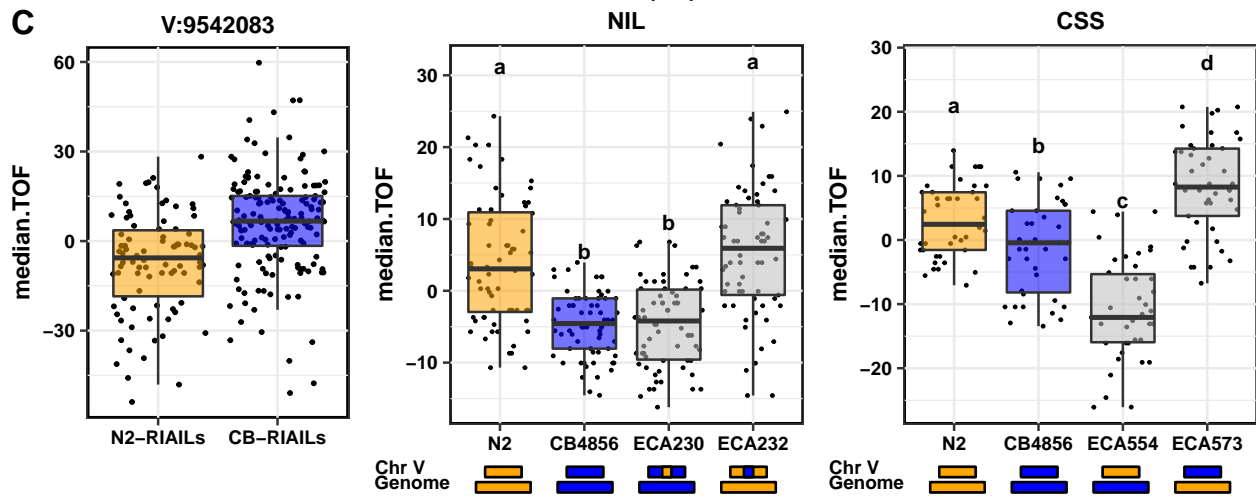



**A silver.n**

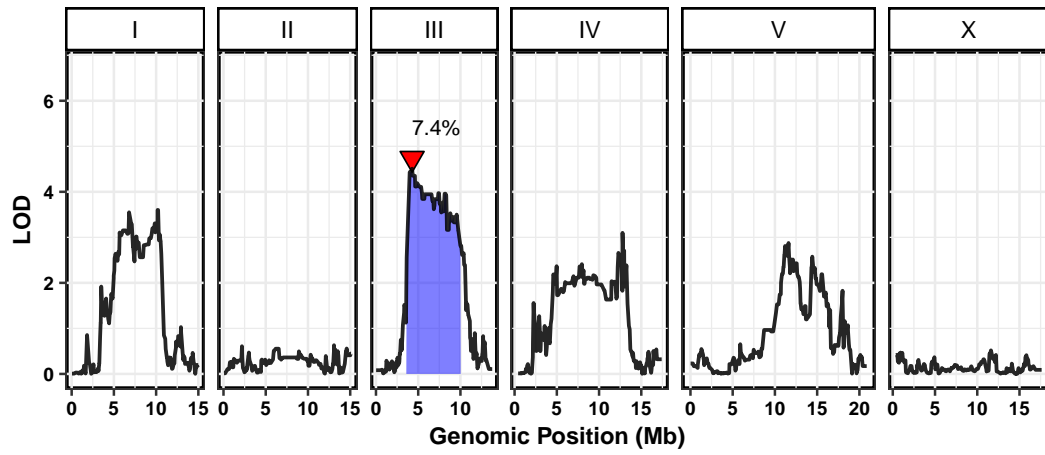

**B**

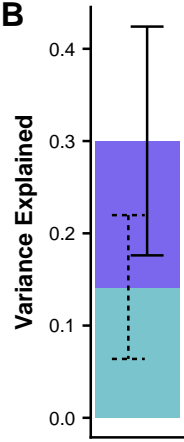

**C**

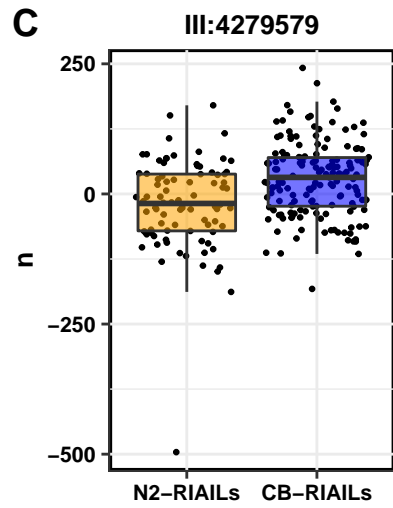

**A silver.norm.n**

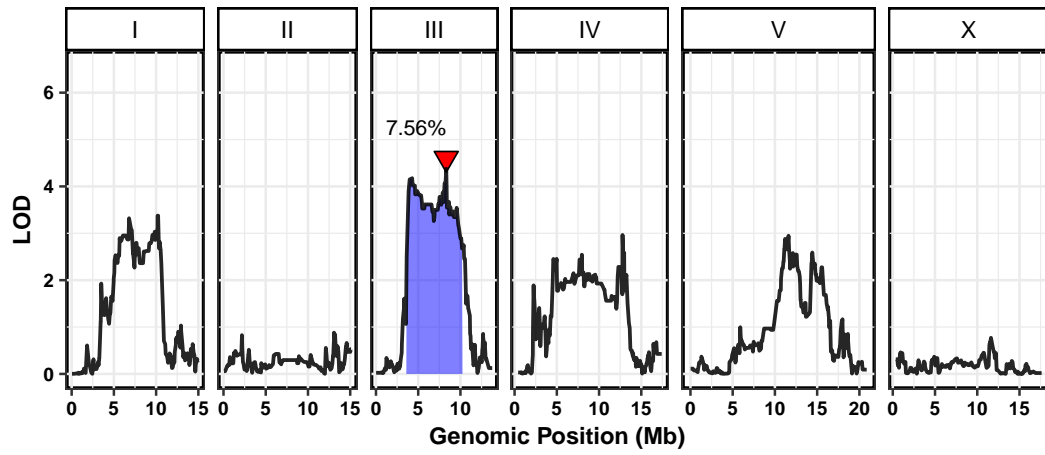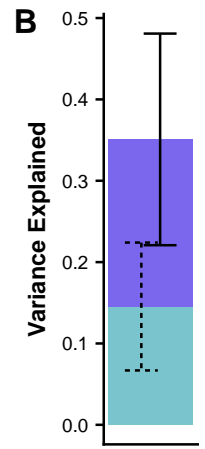

**C**

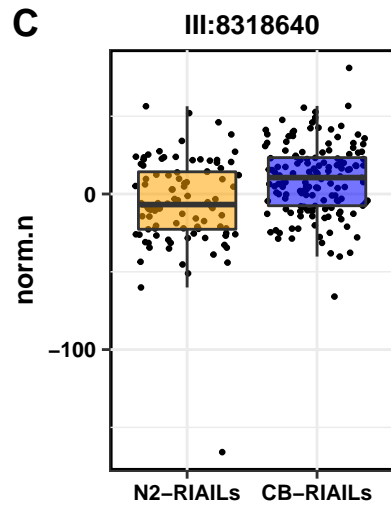

**A silver.q10.EXT**

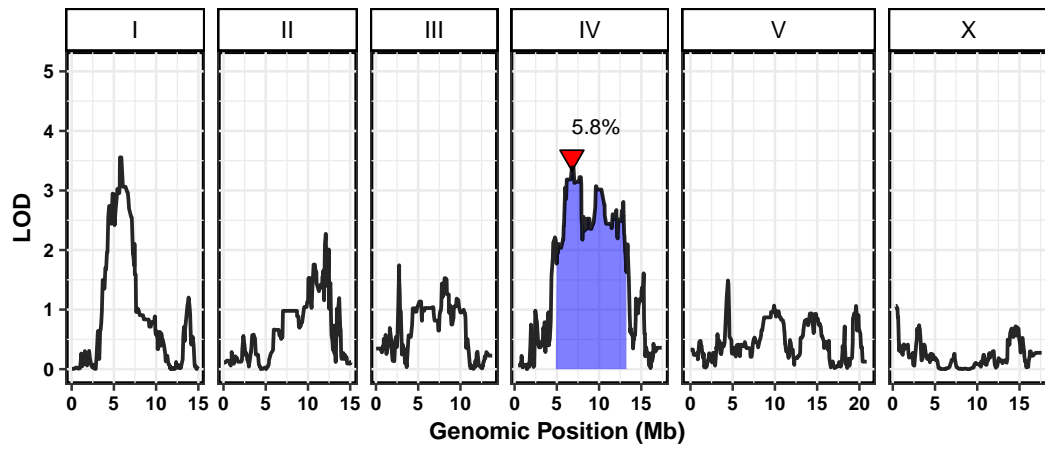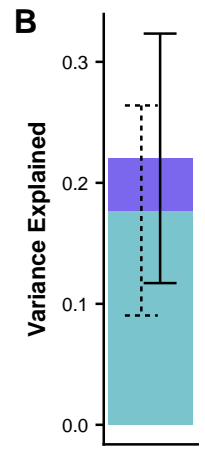

**C**

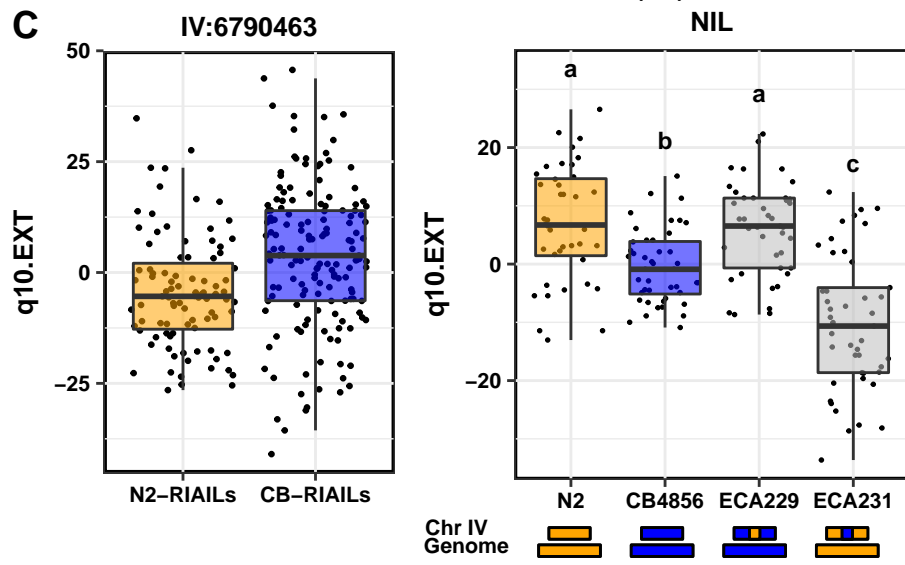

### A silver.q10.norm.EXT

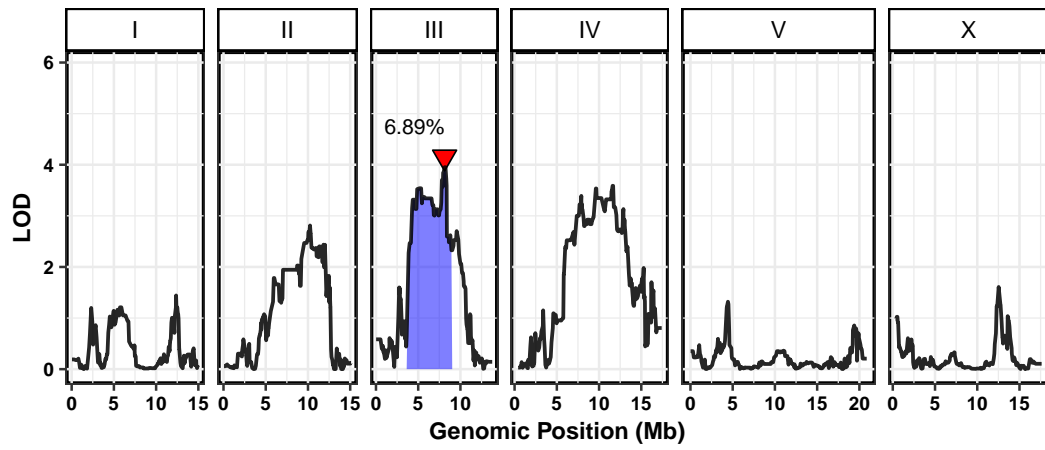

### B

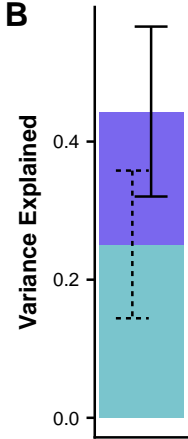

### C

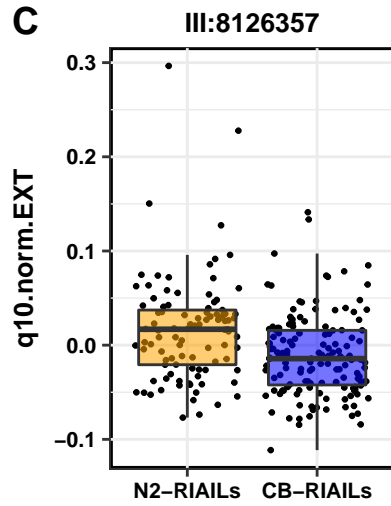

### A silver.q25.EXT

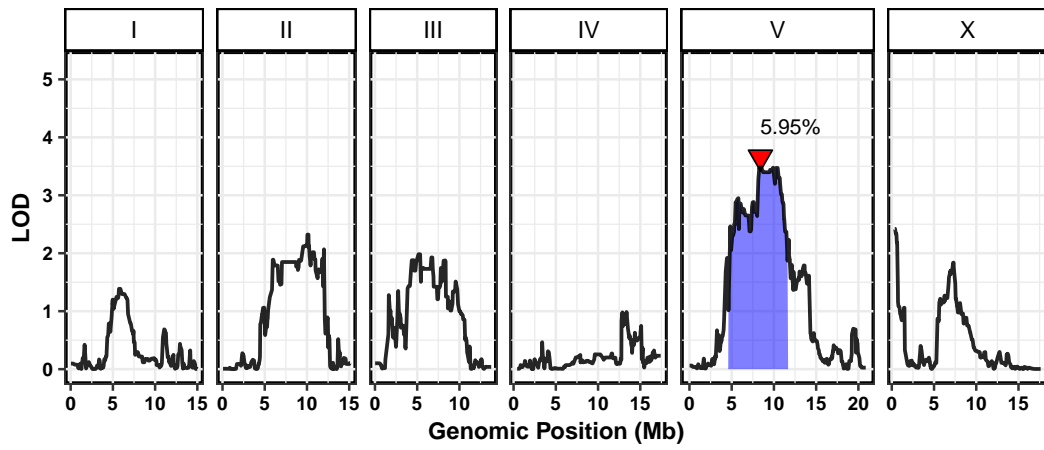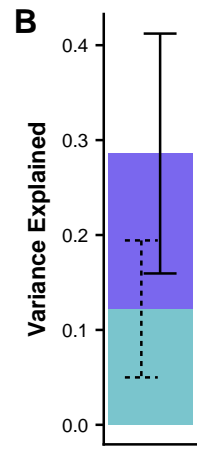

### C

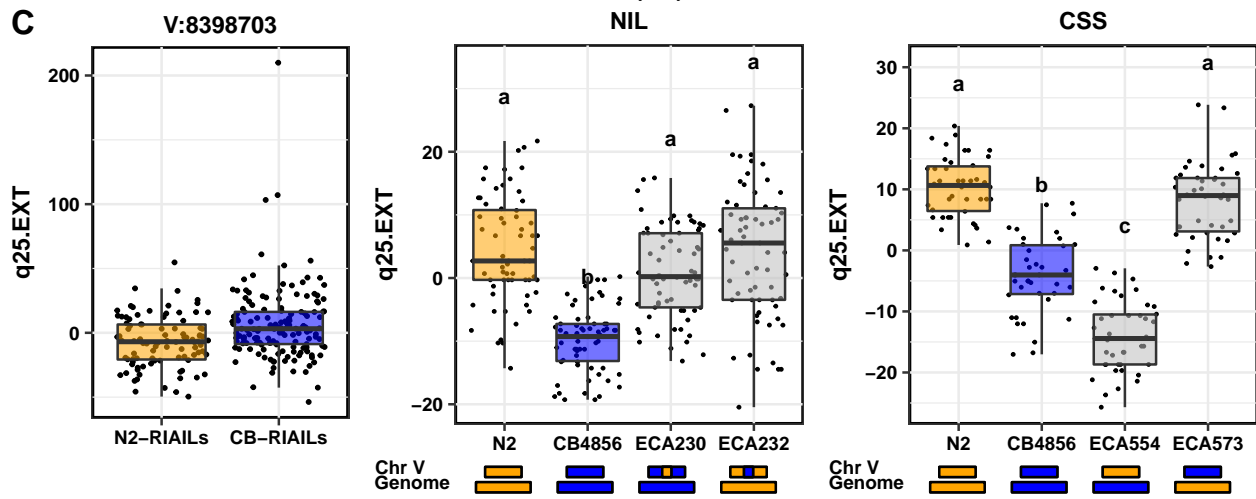

### A silver.q25.norm.EXT

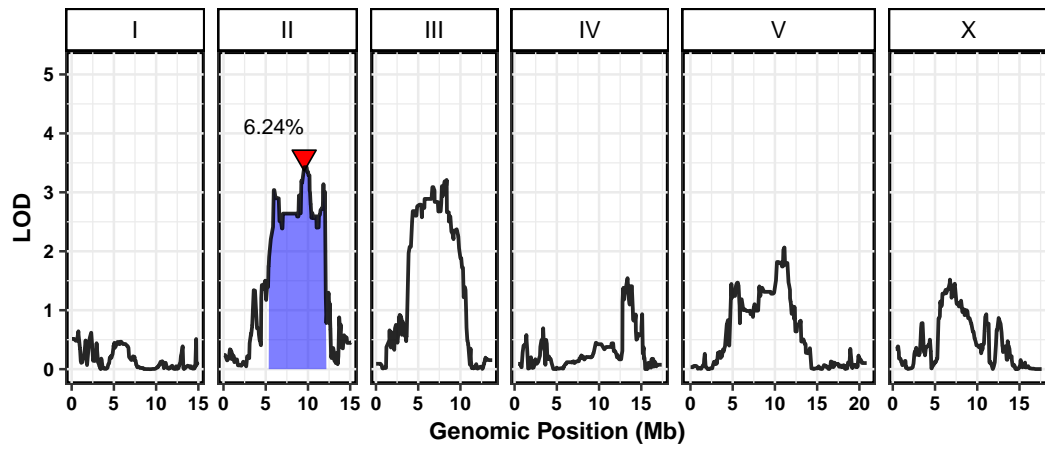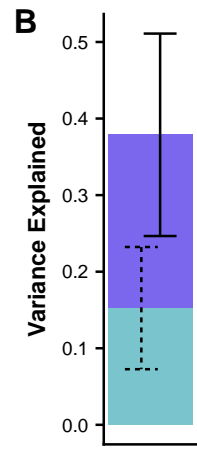

### C

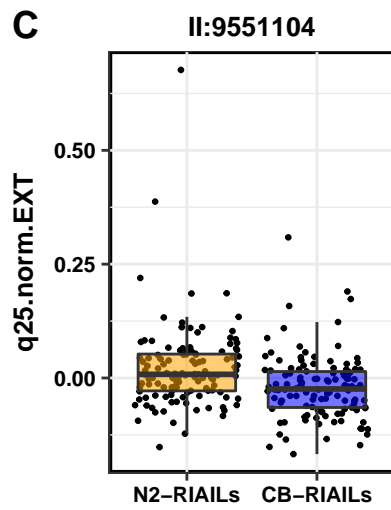

**A silver.q25.TOF**

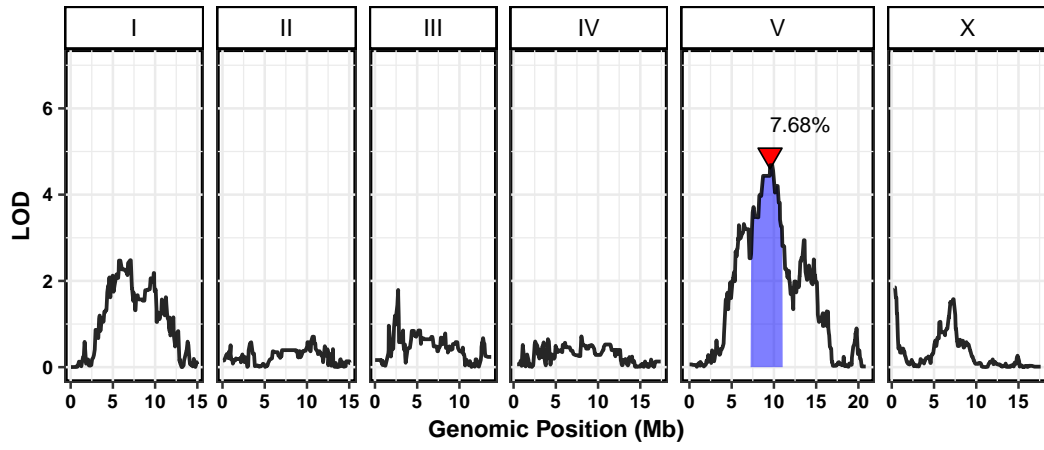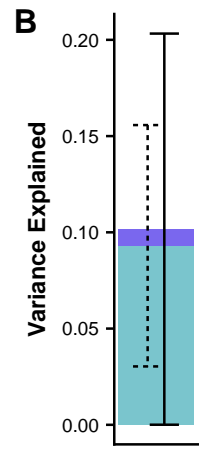

**C**

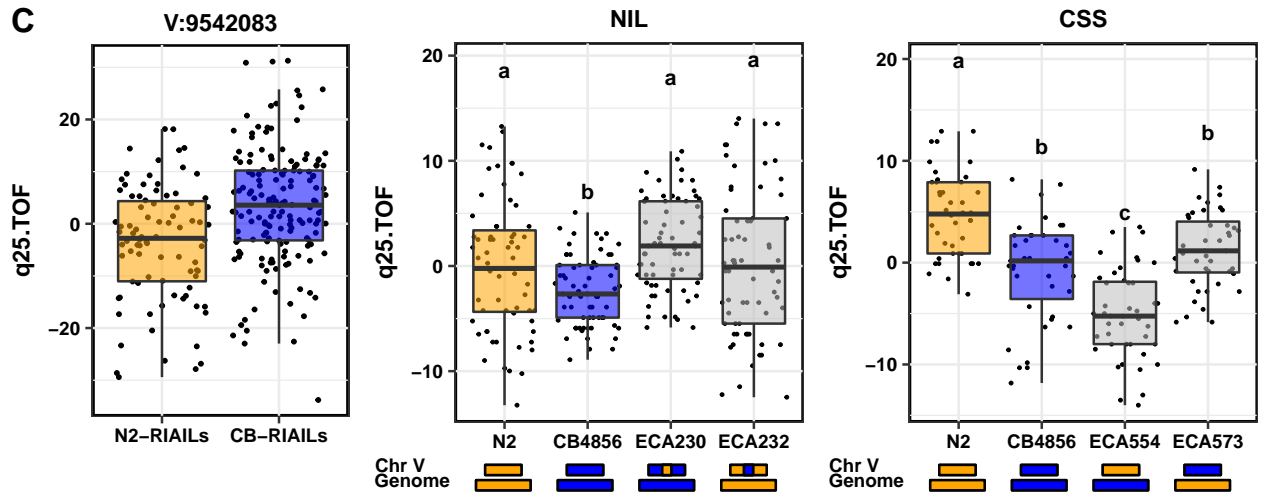

**A silver.q75.EXT**

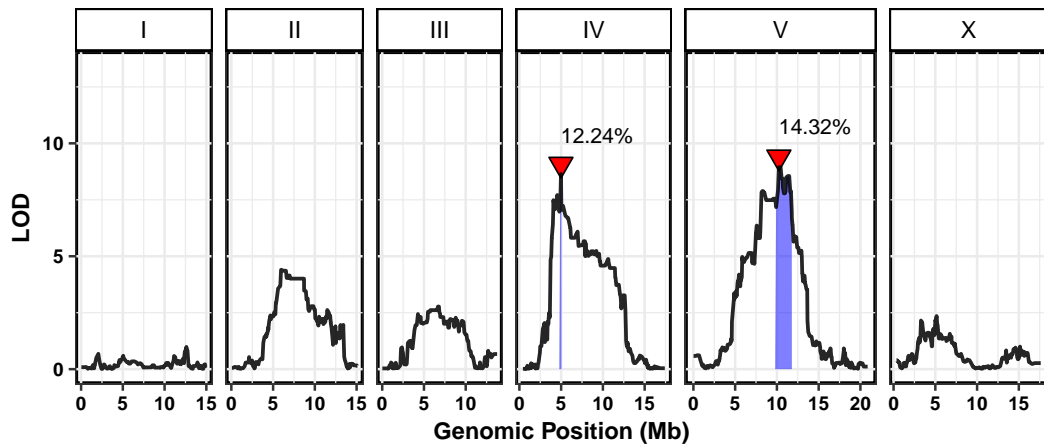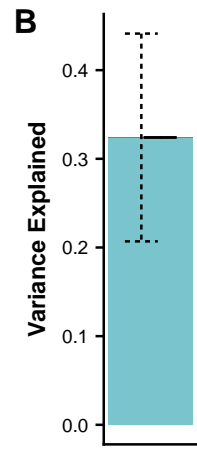

**C**

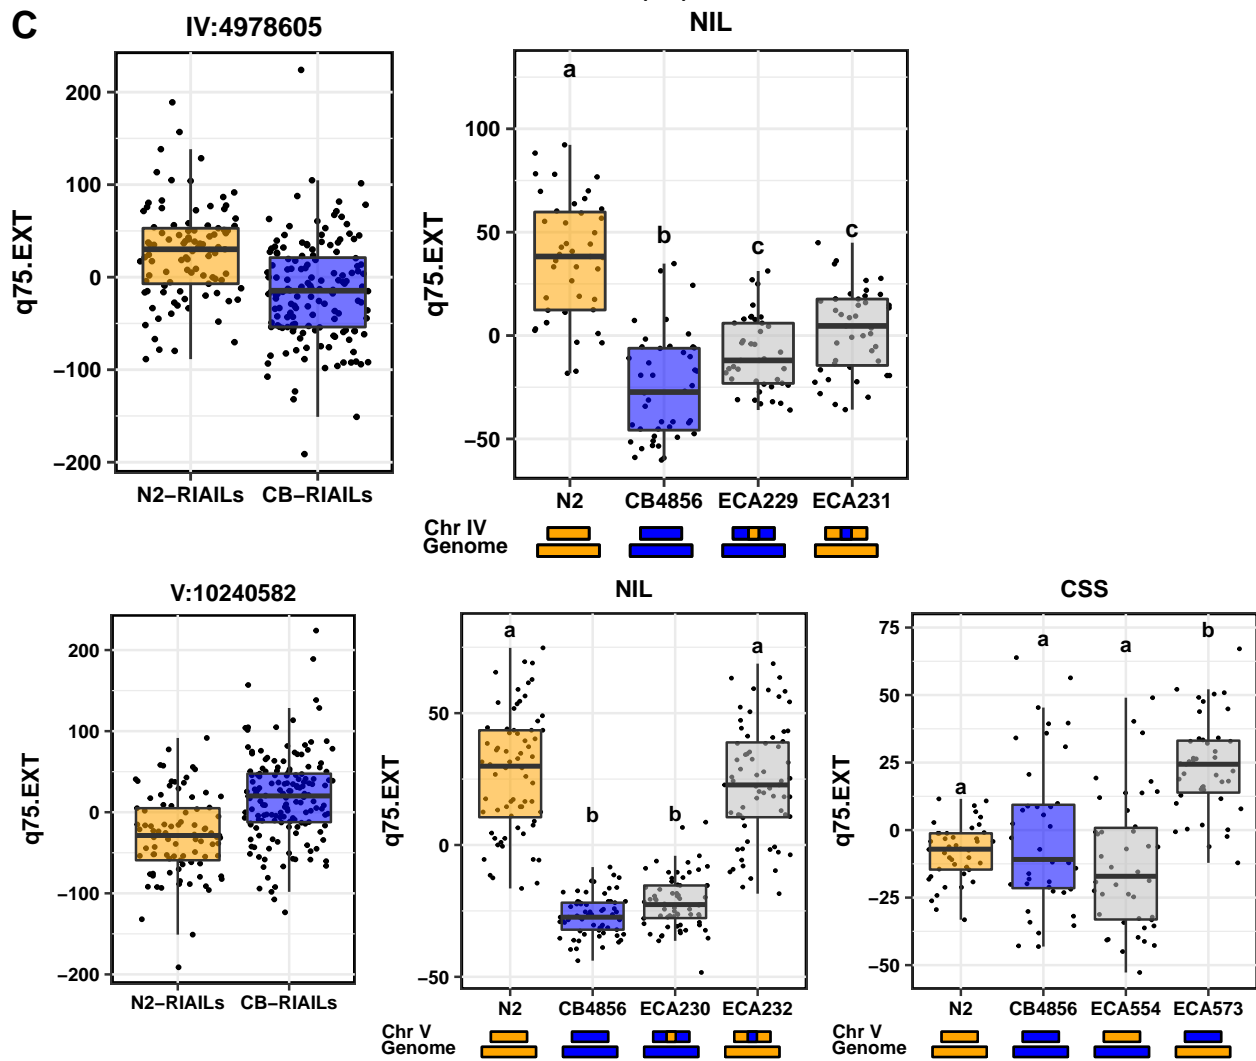



**A silver.q75.norm.EXT**

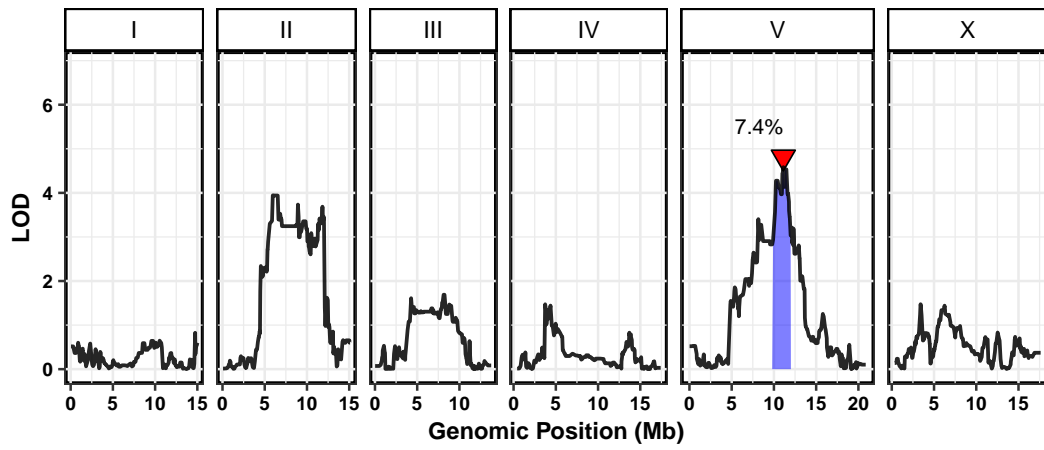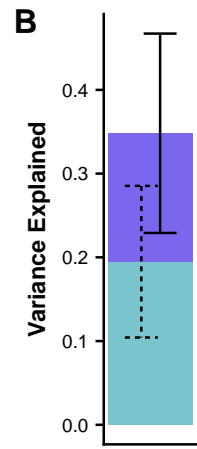

**C**

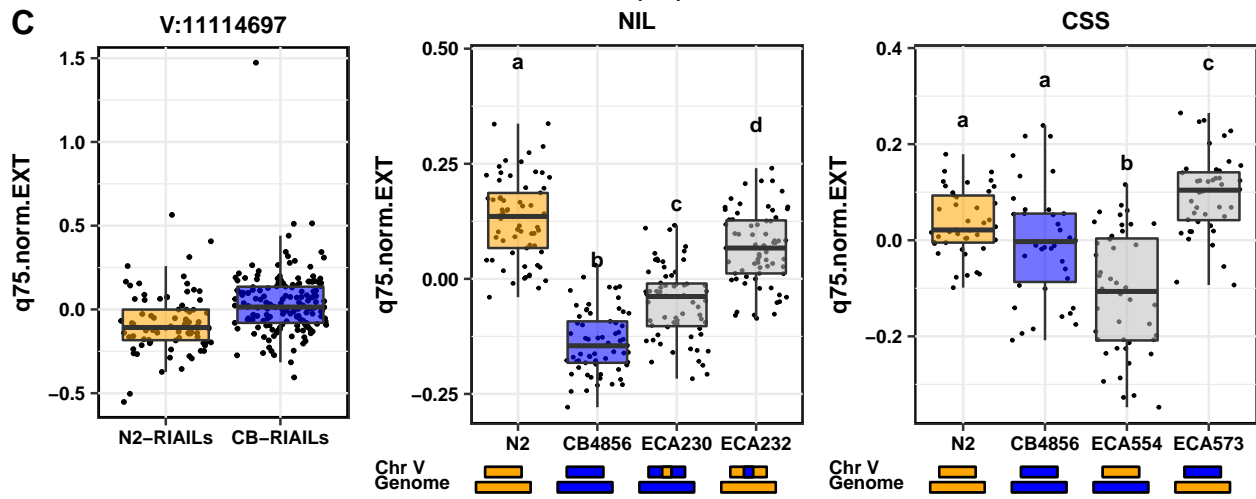

**A silver.q75.TOF**

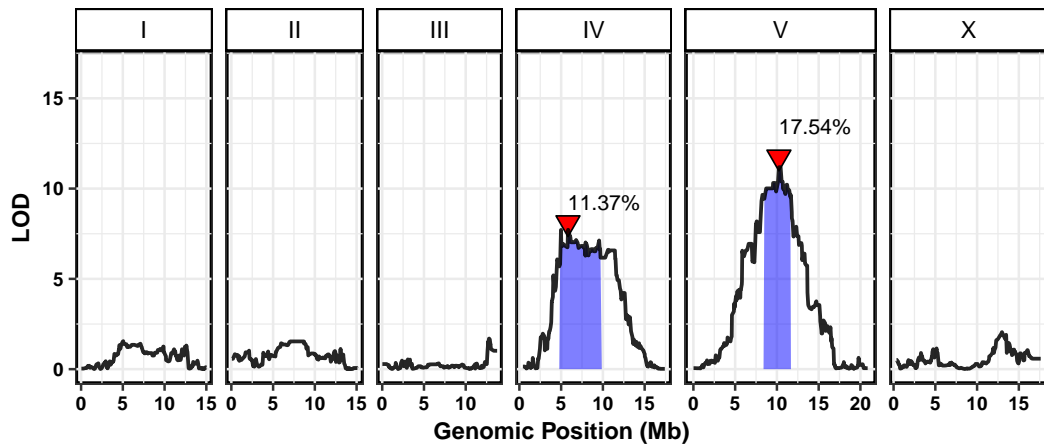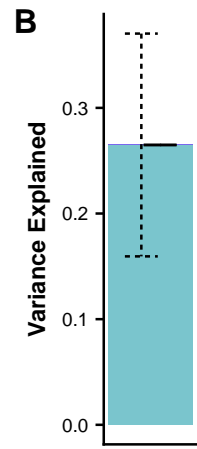

**C IV:5819743**

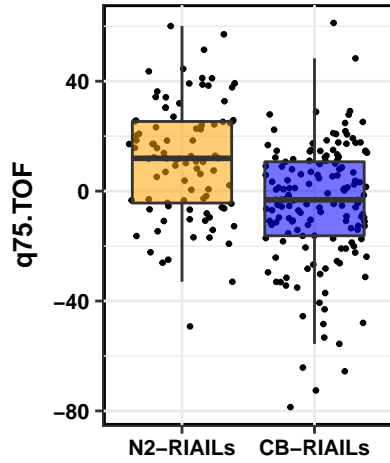

**NIL**

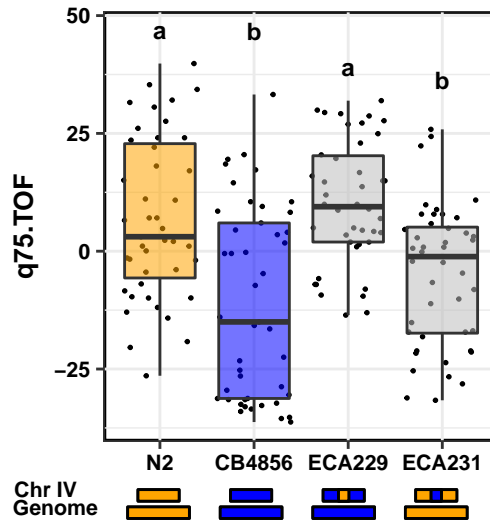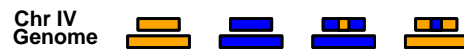

**V:10240582**

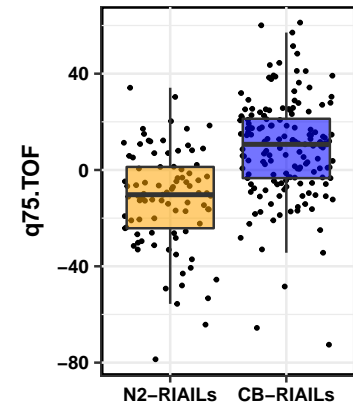

**NIL**

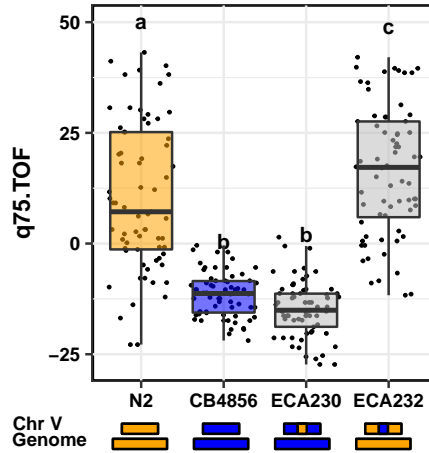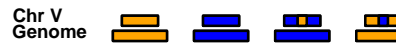

**CSS**

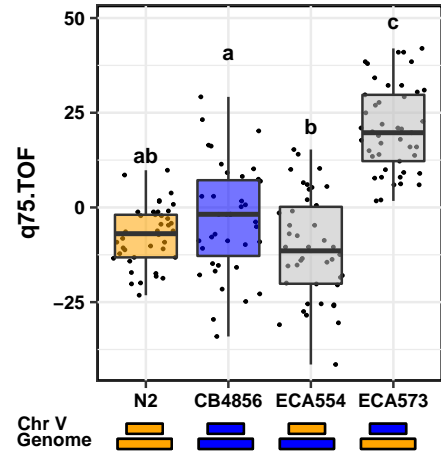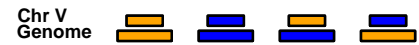

**A silver.q90.EXT**

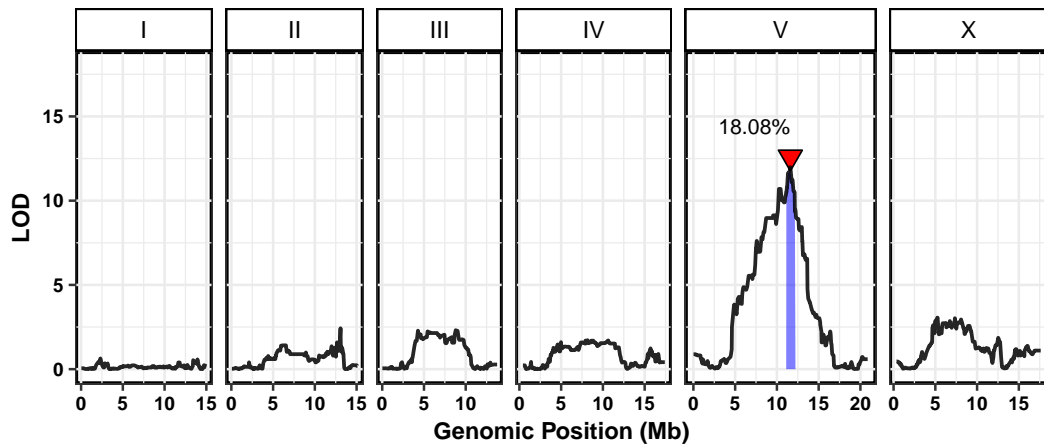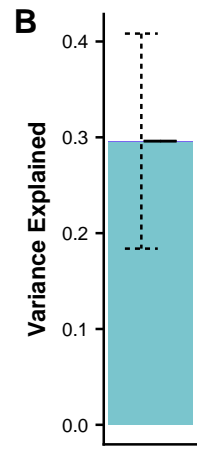

**C**

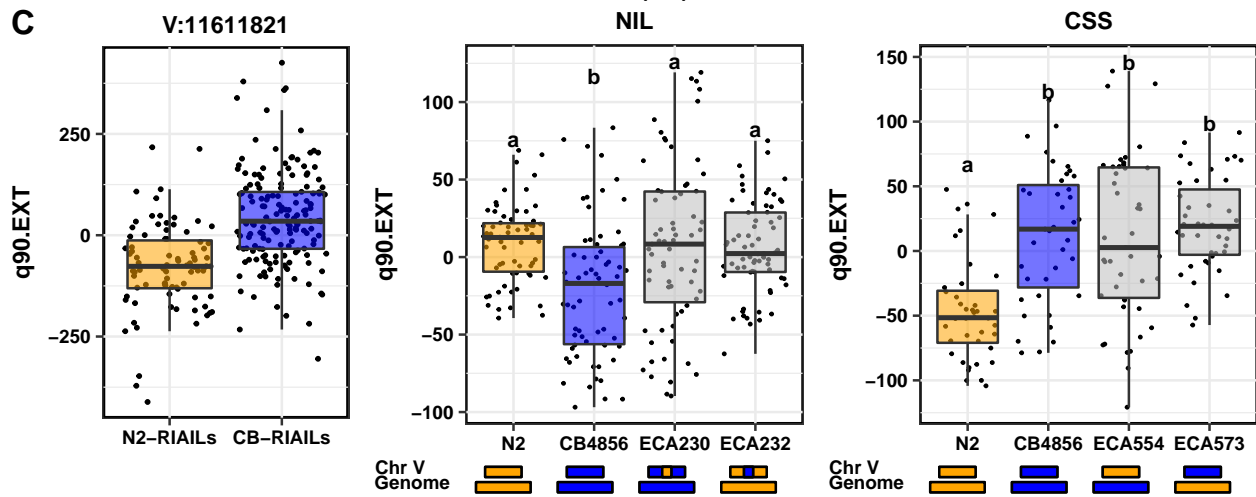

### A silver.q90.norm.EXT

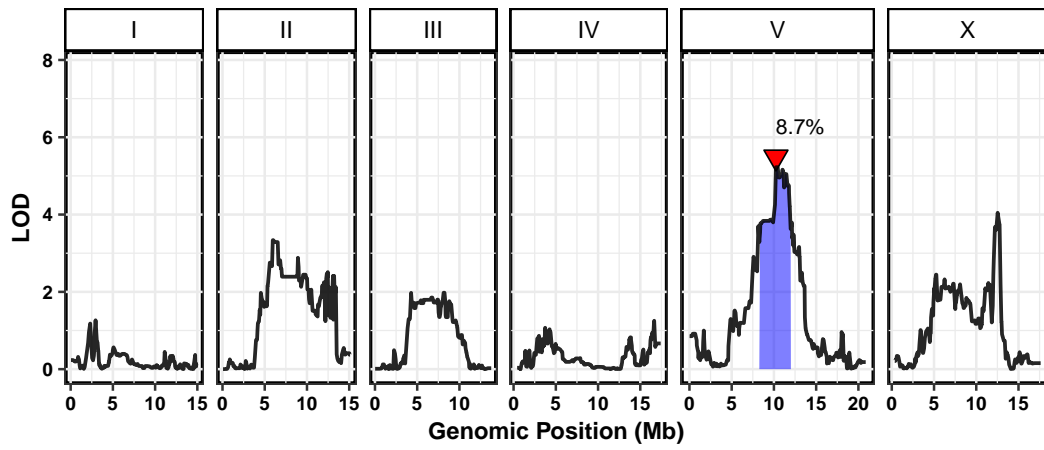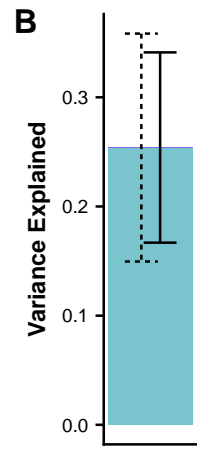

### C

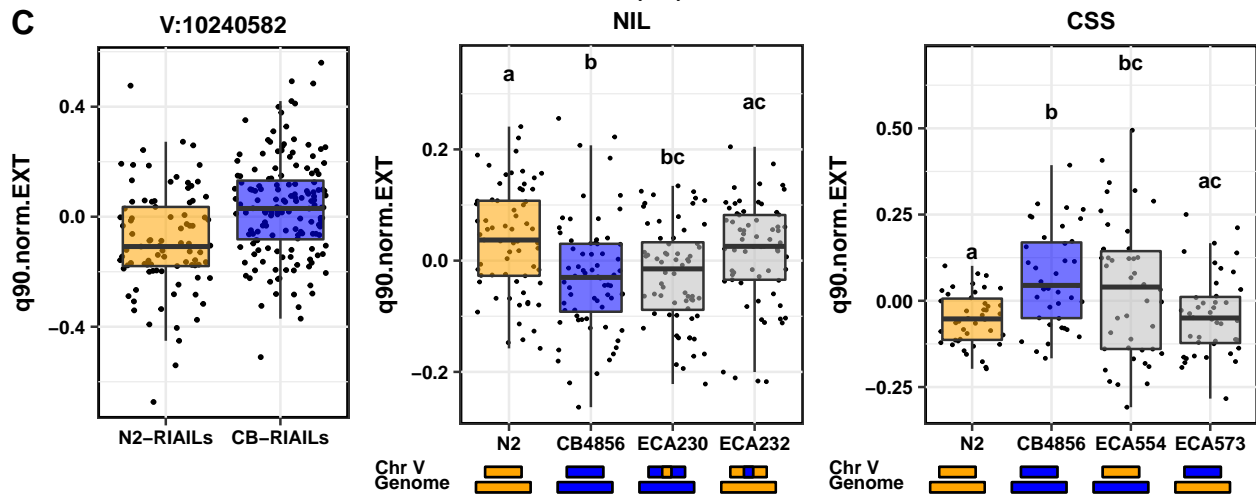

**A silver.q90.TOF**

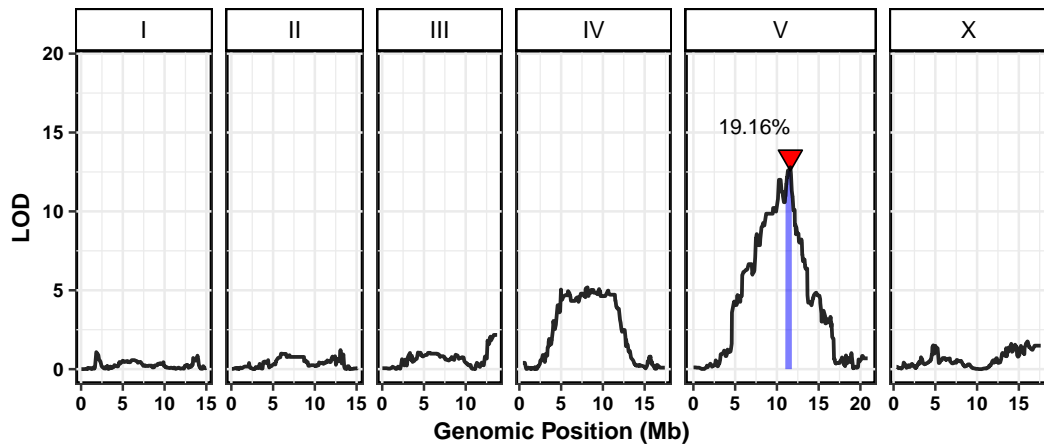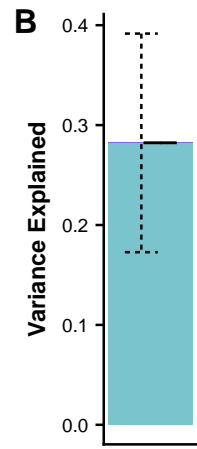

**C**

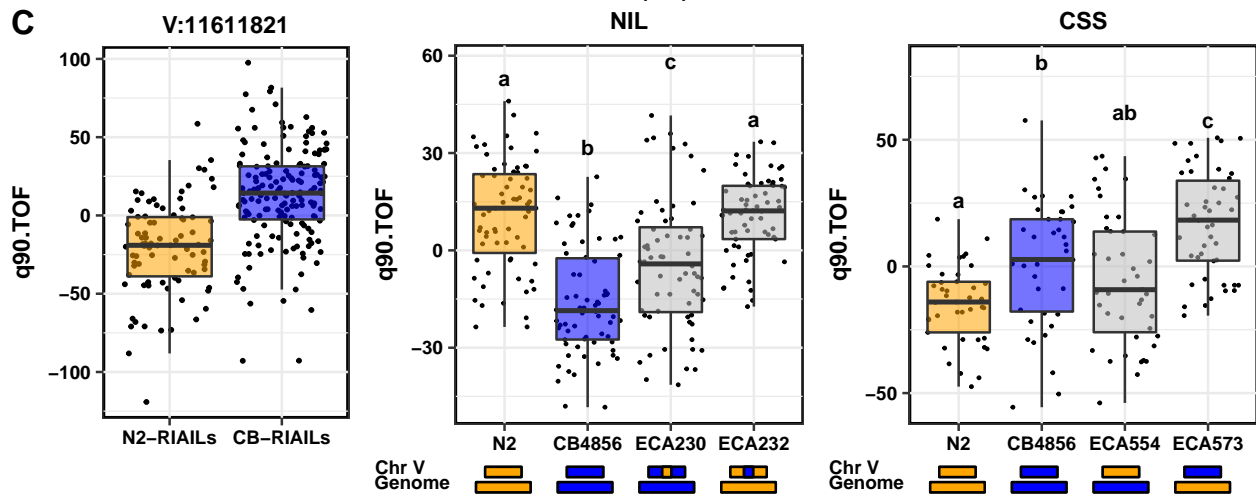

**A silver.var.EXT**

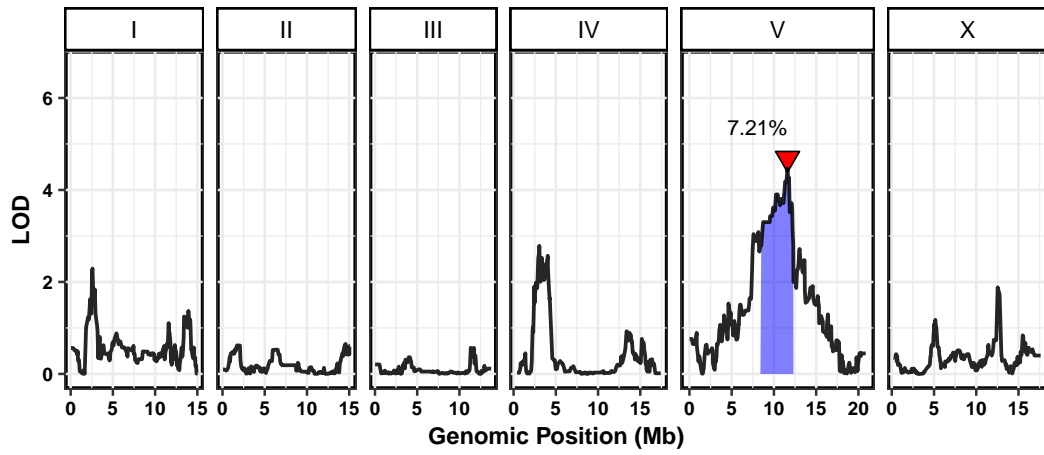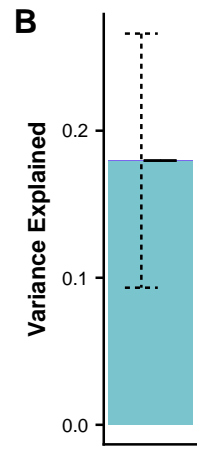

**C**

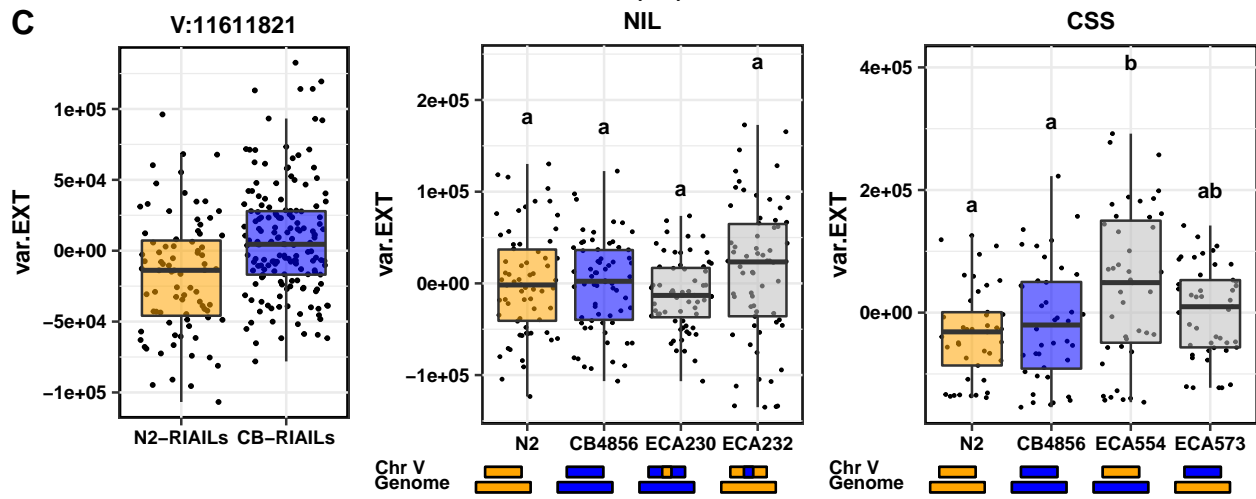

**A silver.var.TOF**

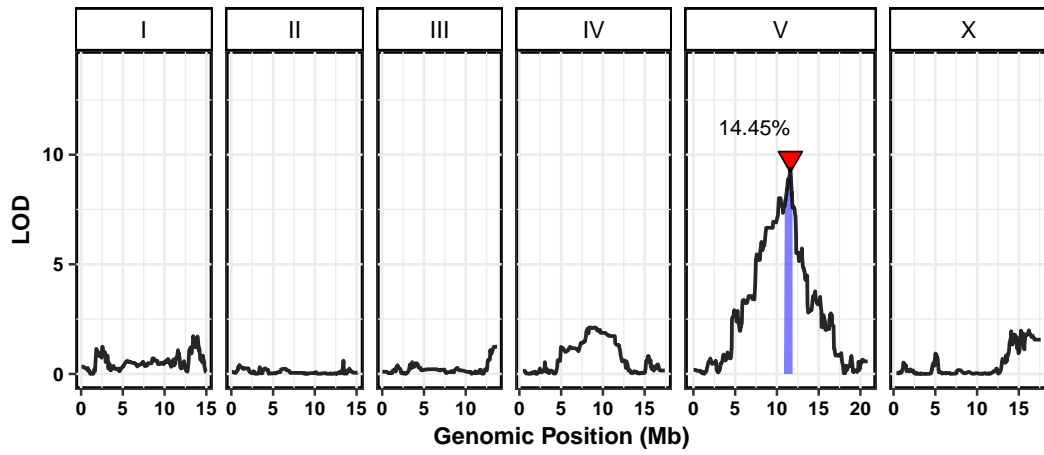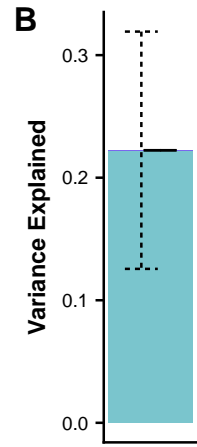

**C V:11611821**

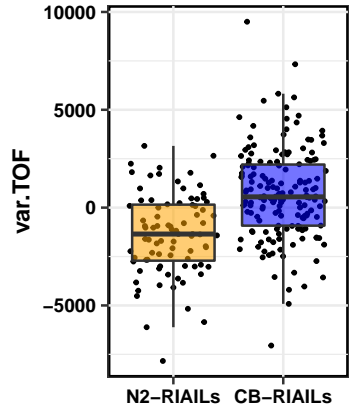

**NIL**

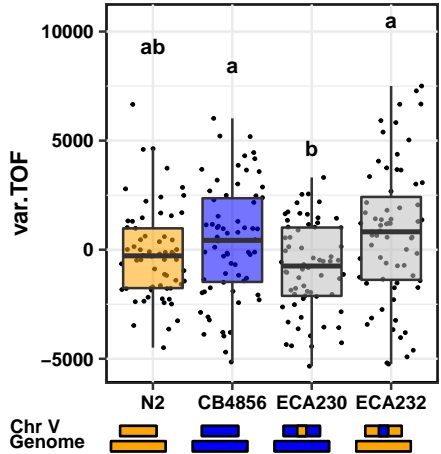

**CSS**

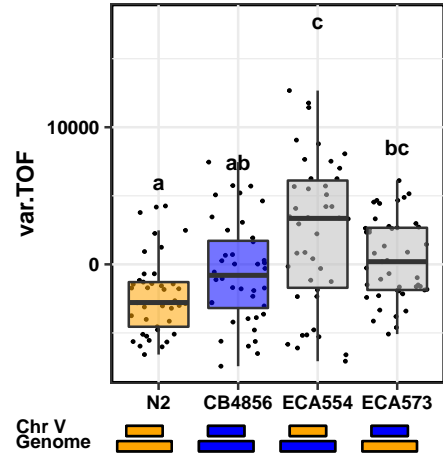

### A topotecan.cv.EXT

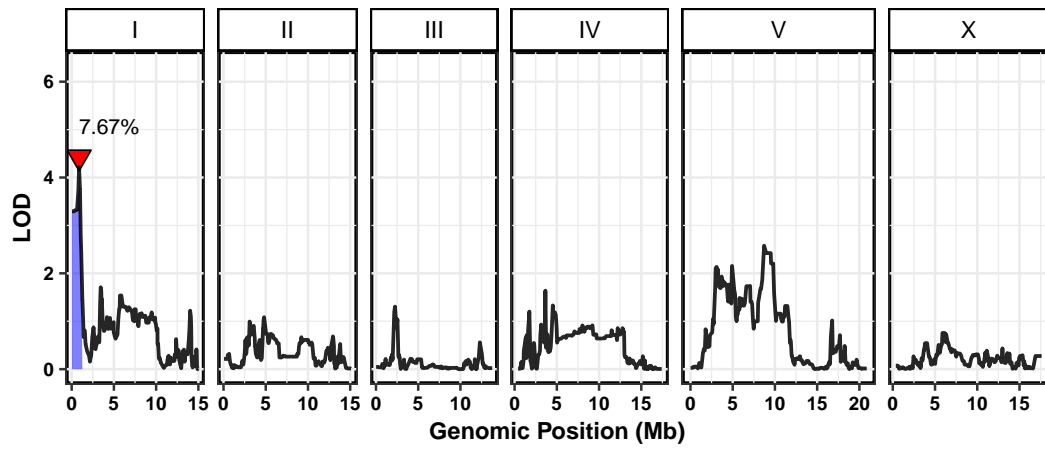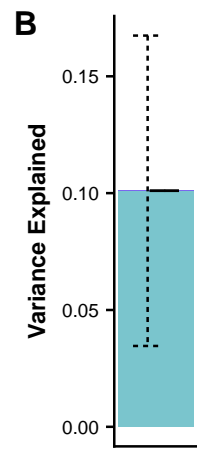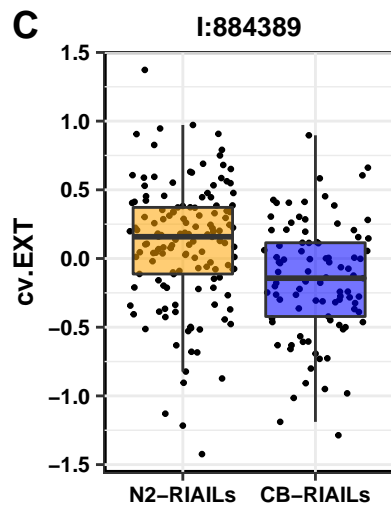



### A topotecan.cv.TOF

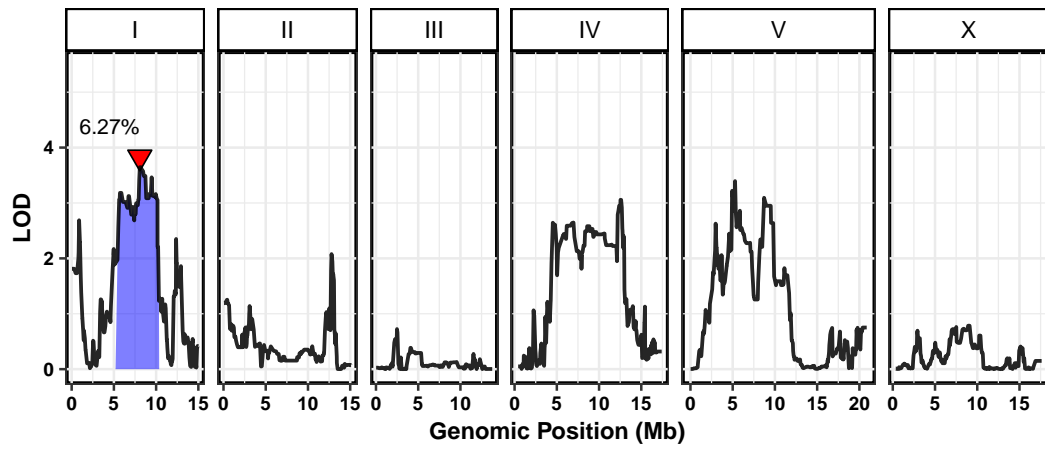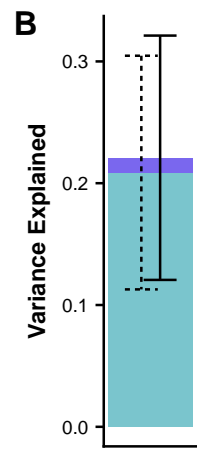

### C I:8069196

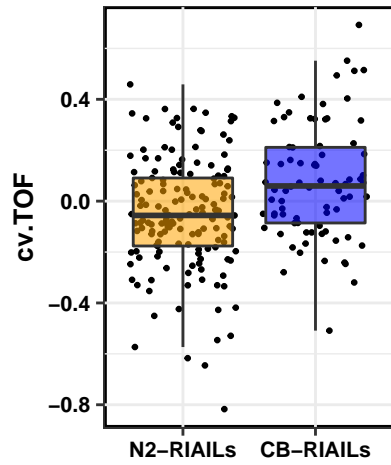

### A topotecan.mean.norm.EXT

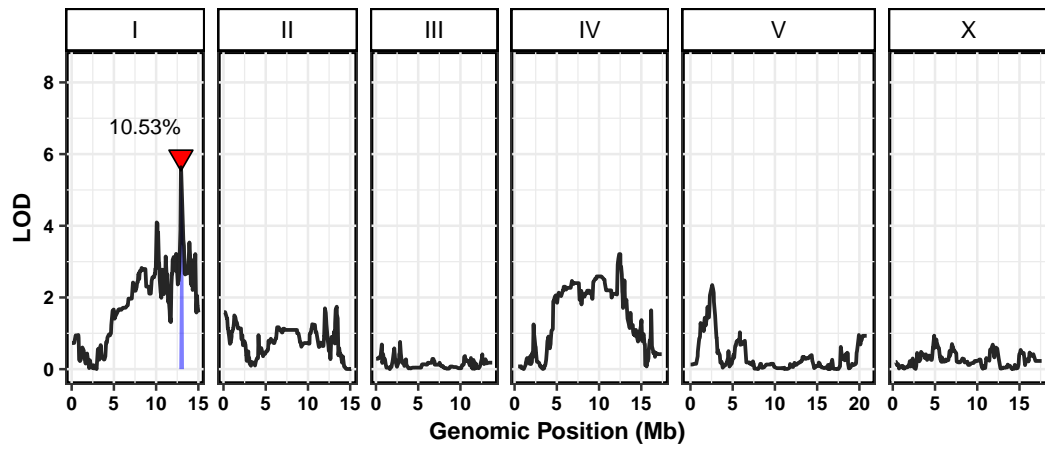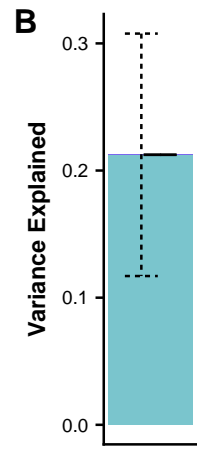

### C I:12936946

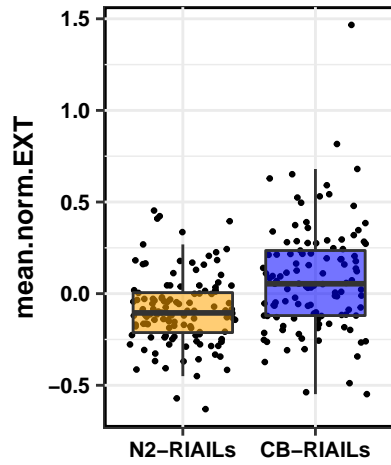

### A topotecan.median.norm.EXT

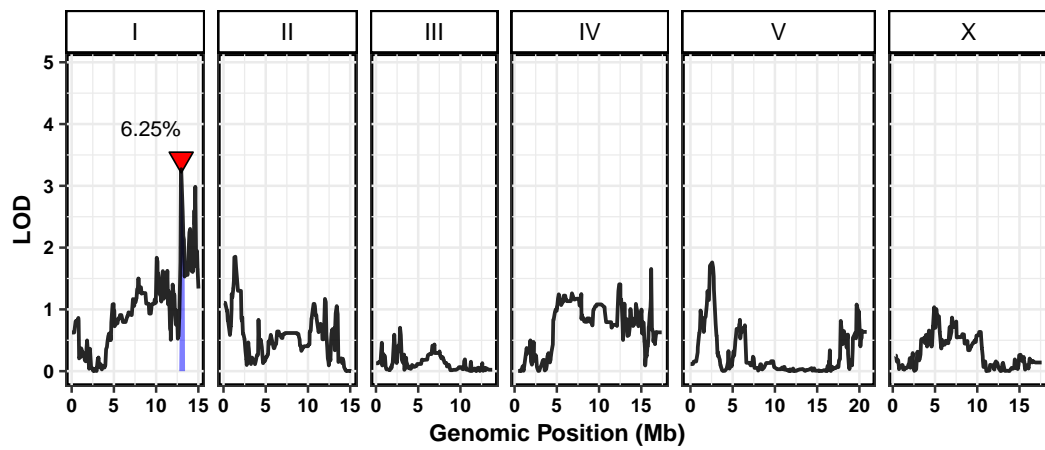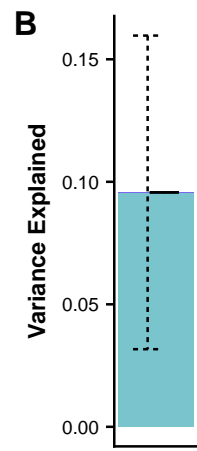

### C

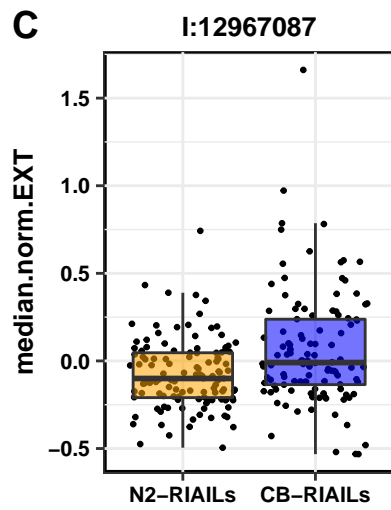

### A topotecan.median.TOF

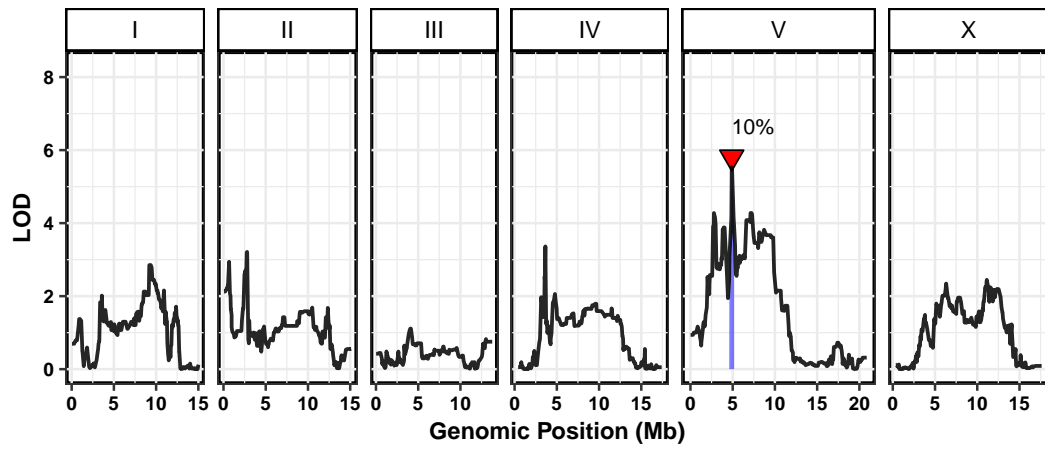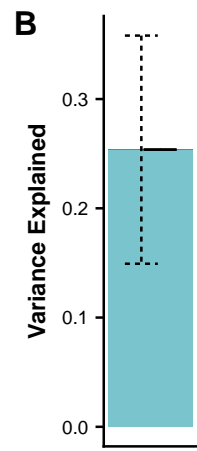

### C V:4889130

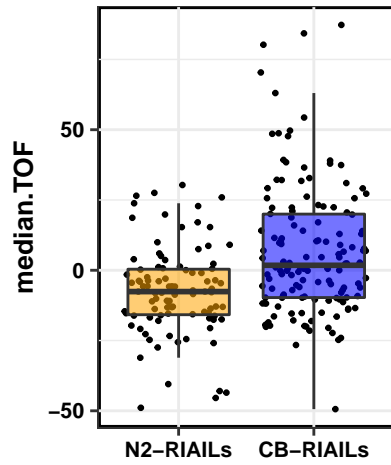

**A** topotecan.n

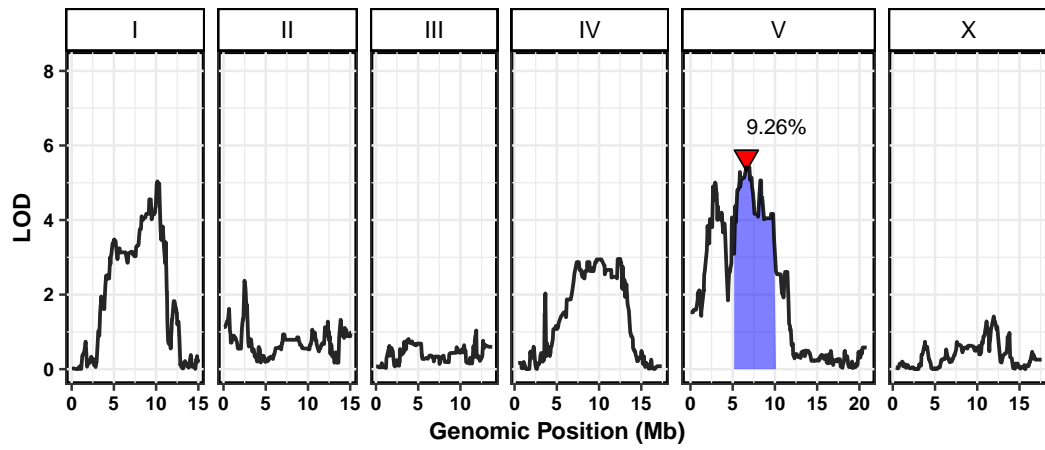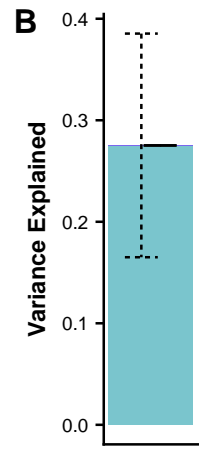

**C** V:6618053

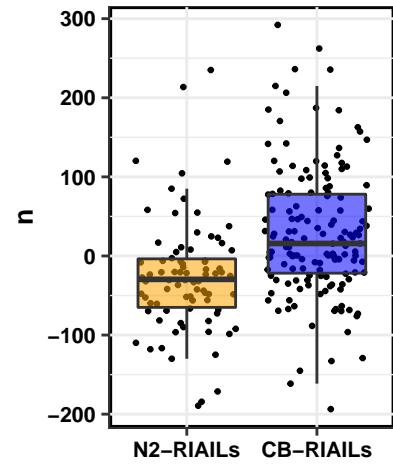

**A** topotecan.norm.n

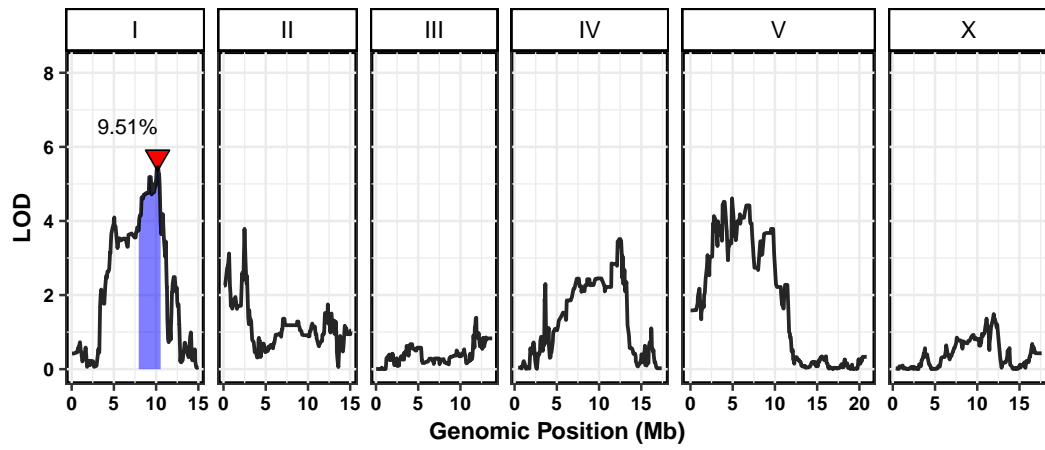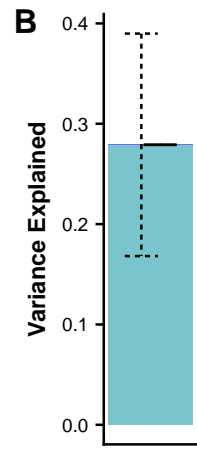

**C** I:10170689

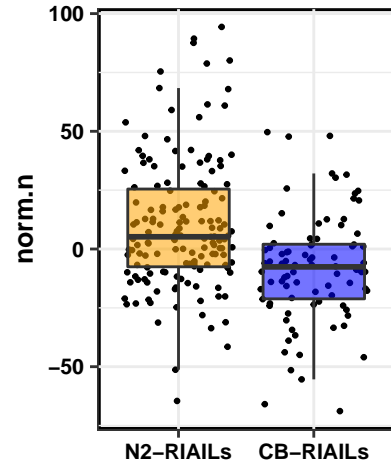

**A** topotecan.q10.TOF

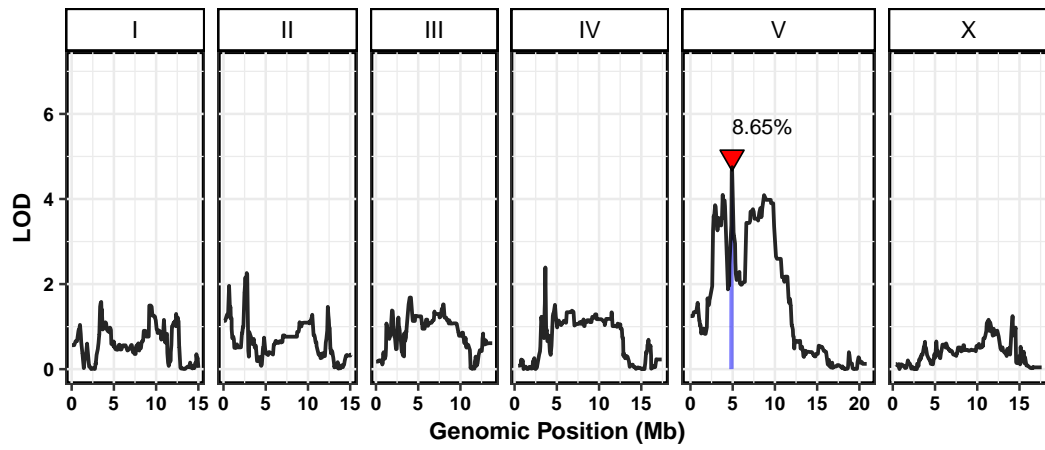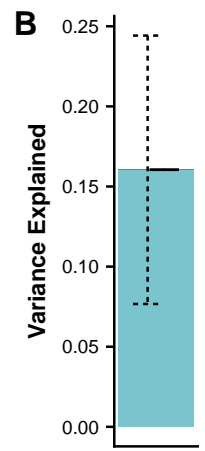

**C** V:4927583

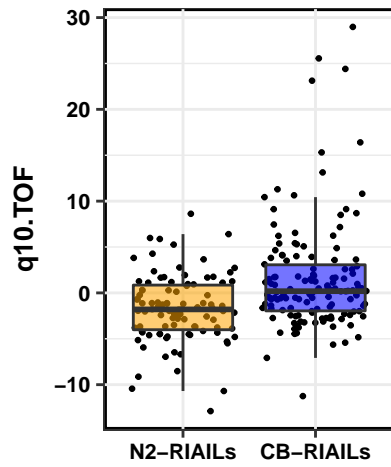

**A** topotecan.q25.TOF

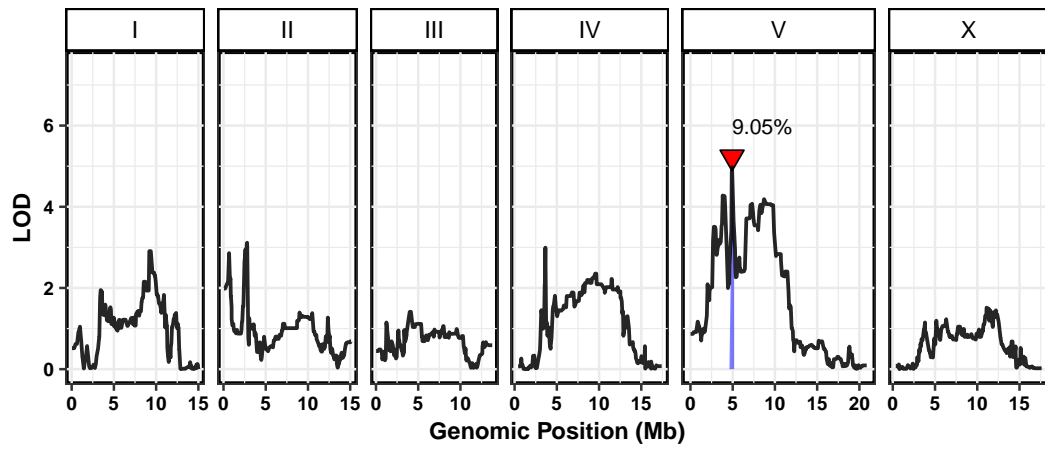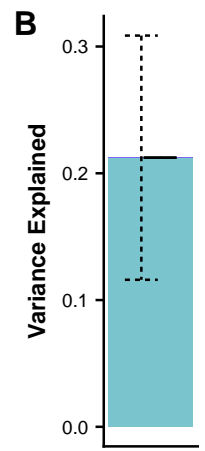

**C**

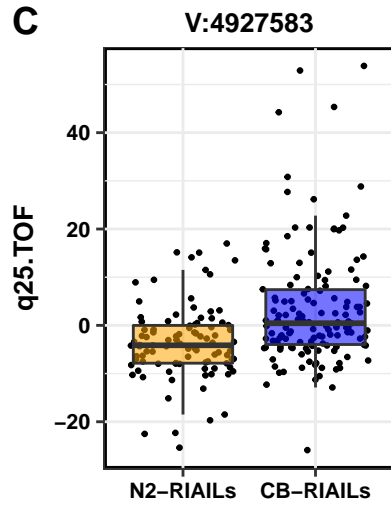



**A** topotecan.q75.EXT

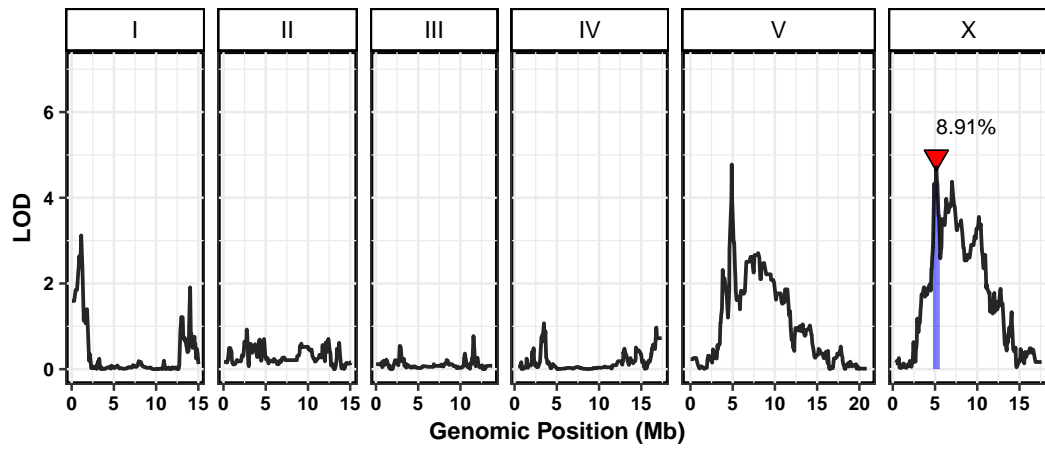

**B**

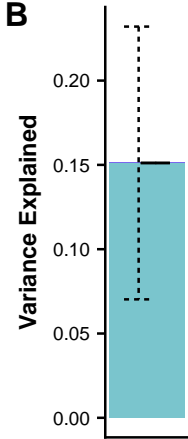

**C**

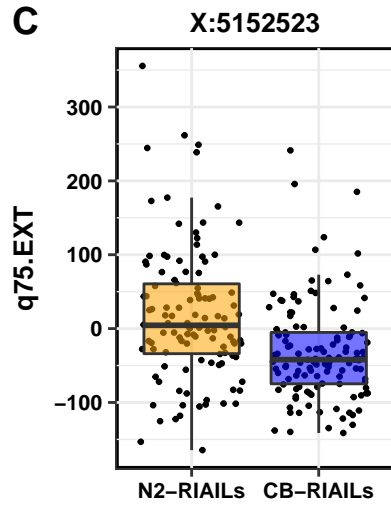

### A topotecan.q75.norm.EXT

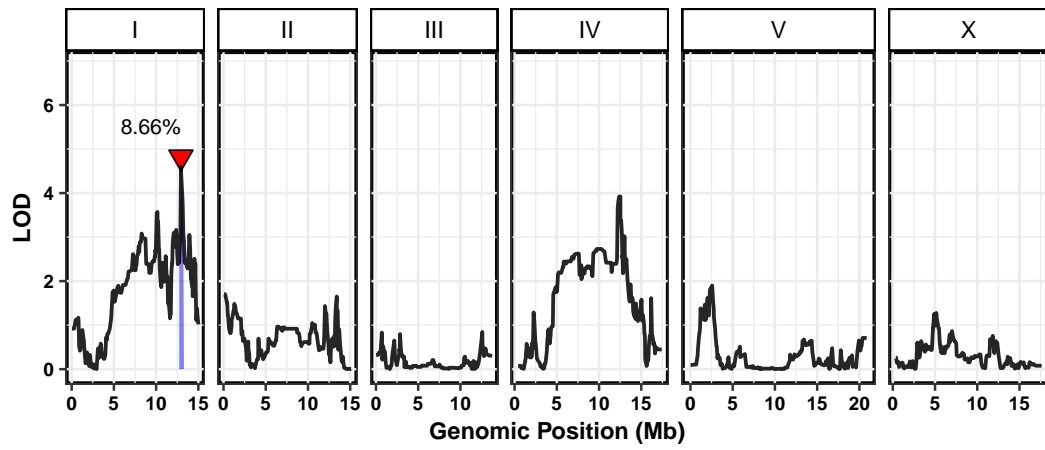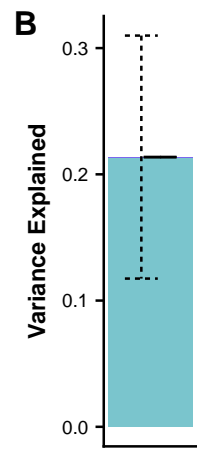

### C I:12936946

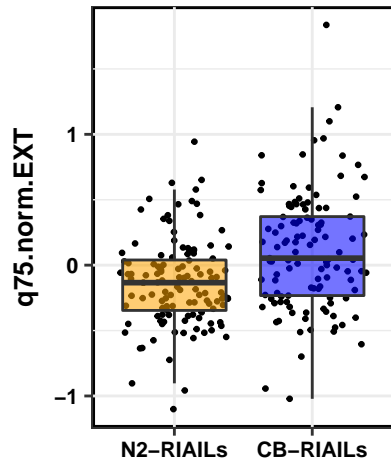

### A topotecan.q75.TOF

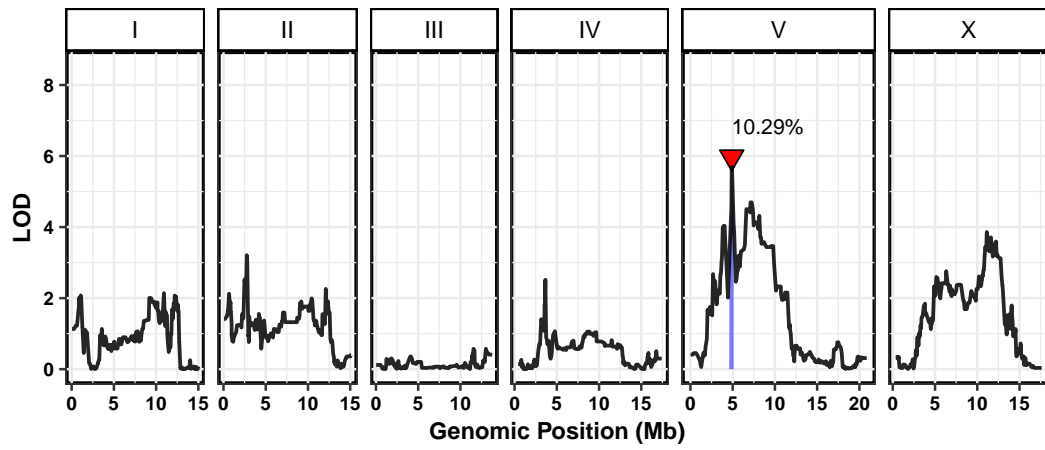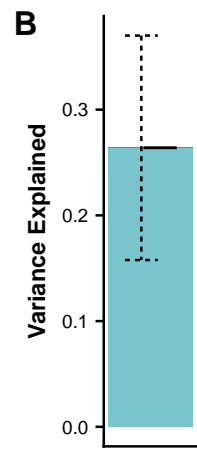

### C V:4889130

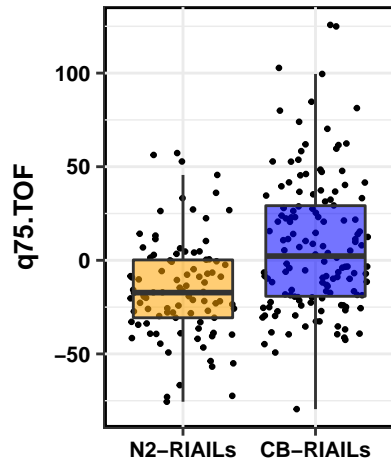

### A topotecan.q90.EXT

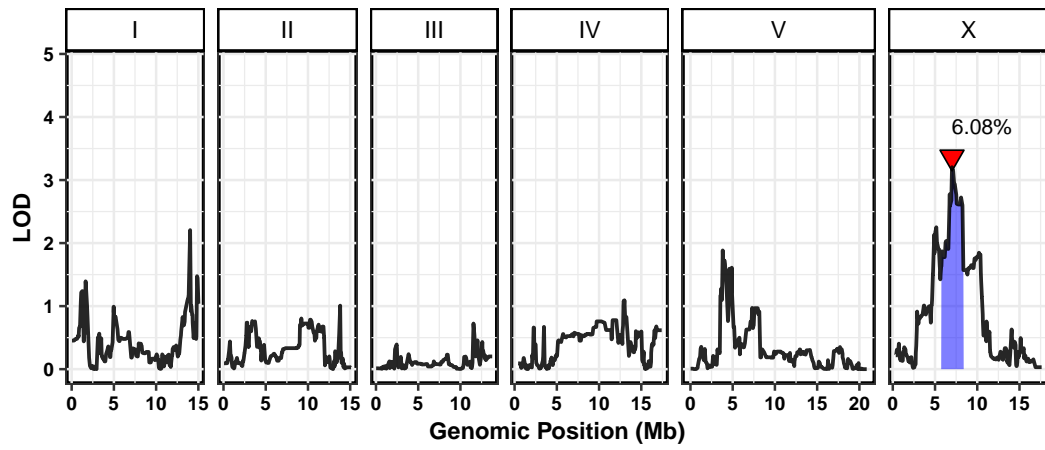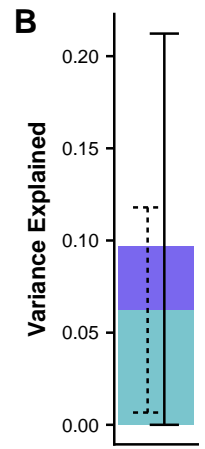

### C X:7009811

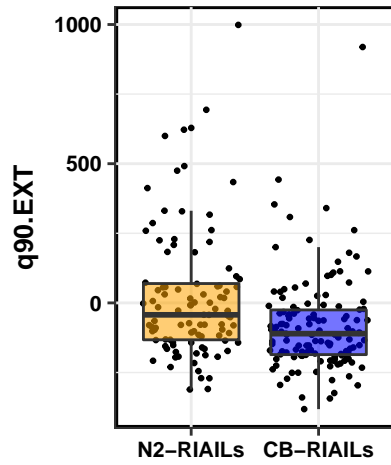

### A topotecan.q90.norm.EXT

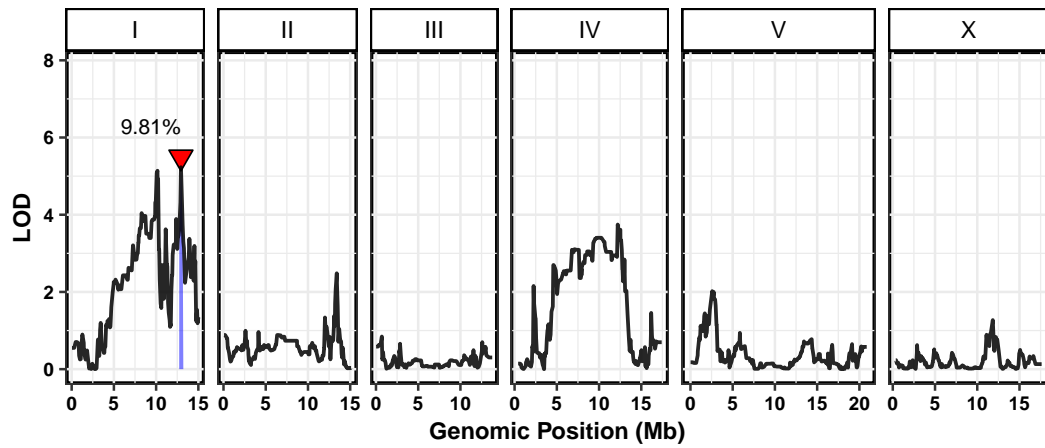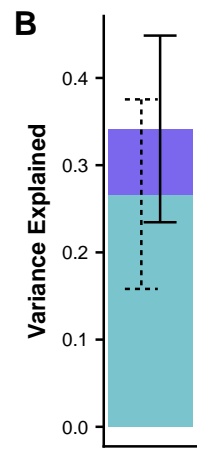

### C I:12936946

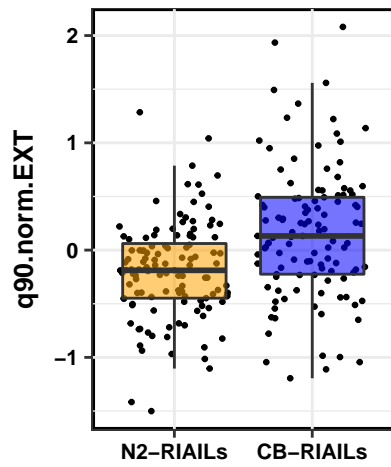

### A topotecan.var.EXT

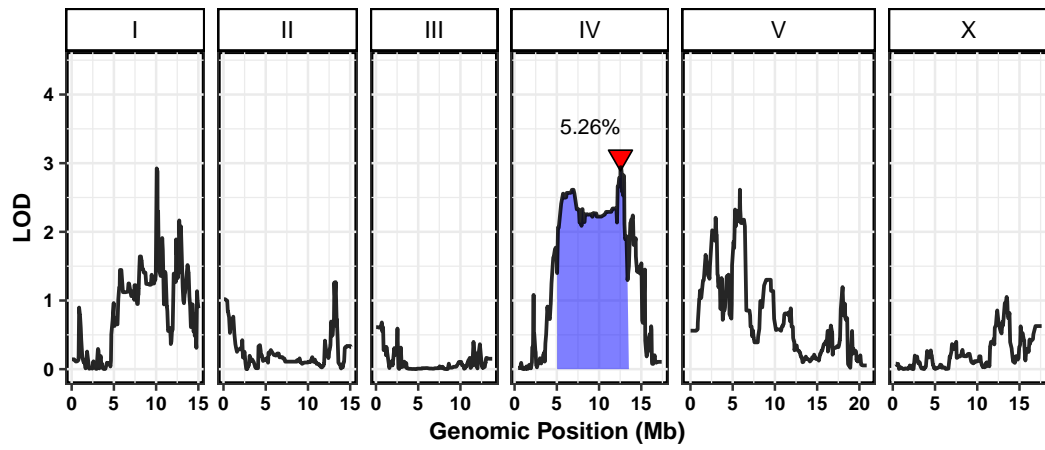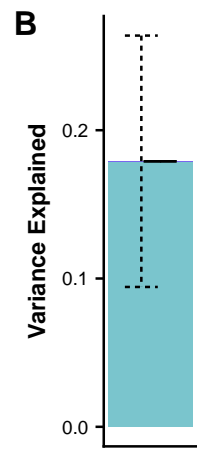

### C IV:12534731

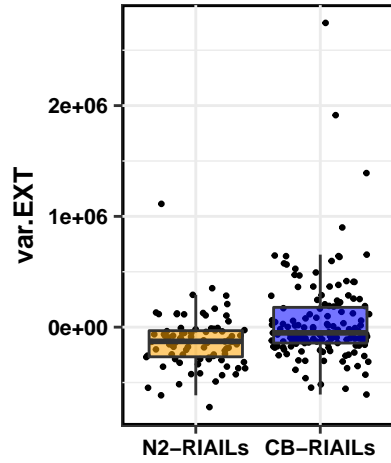

**A** topotecan.var.TOF

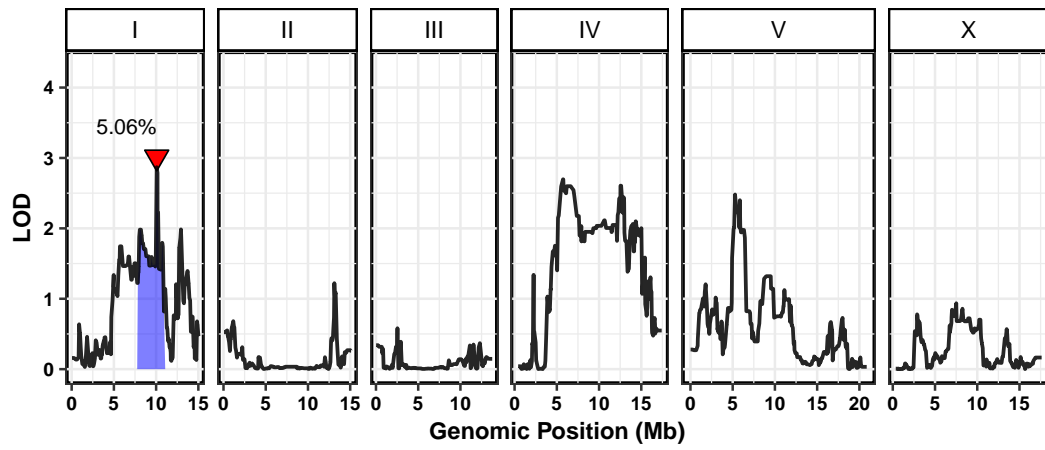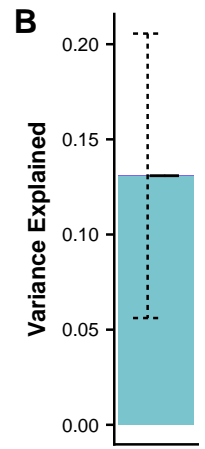

**C** I:10069741

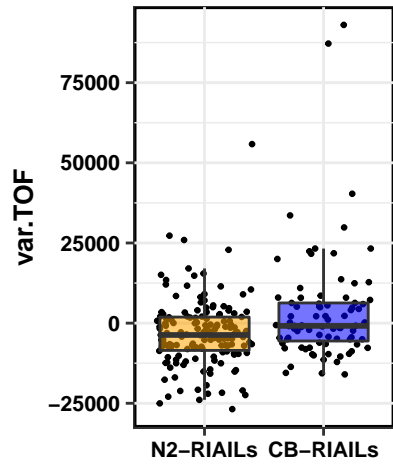

**A** tunicamycin.cv.EXT

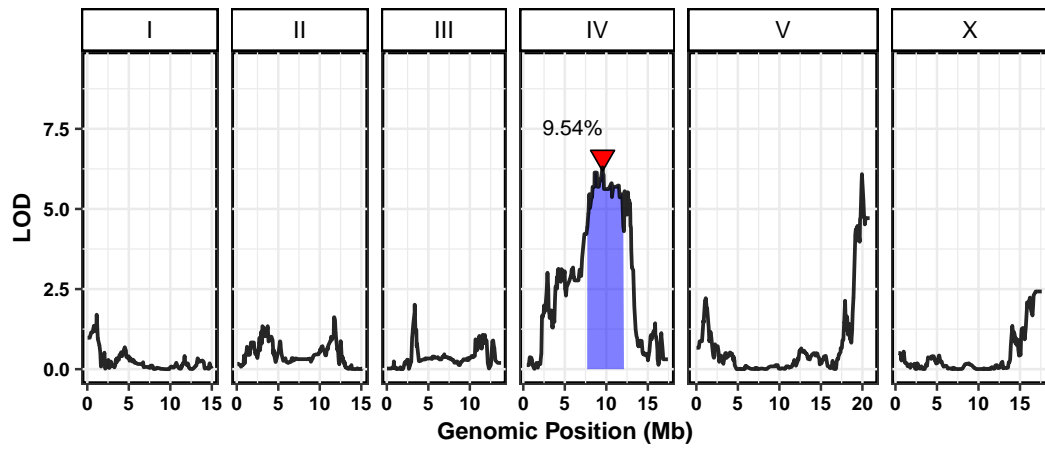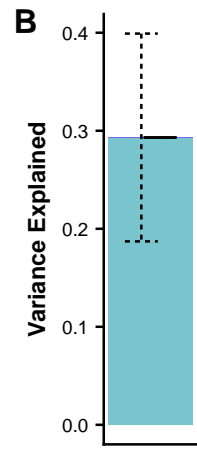

**C** IV:9548910

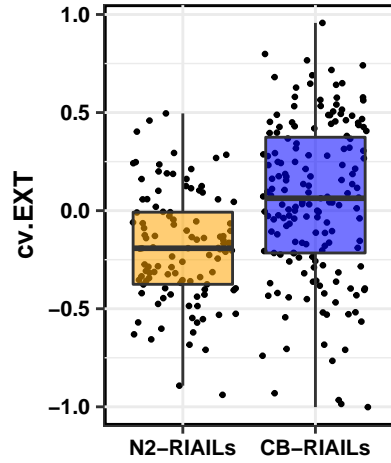

NIL

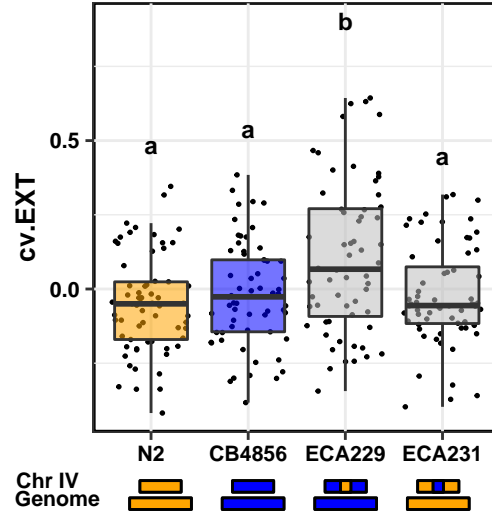



**A tunicamycin.mean.EXT**

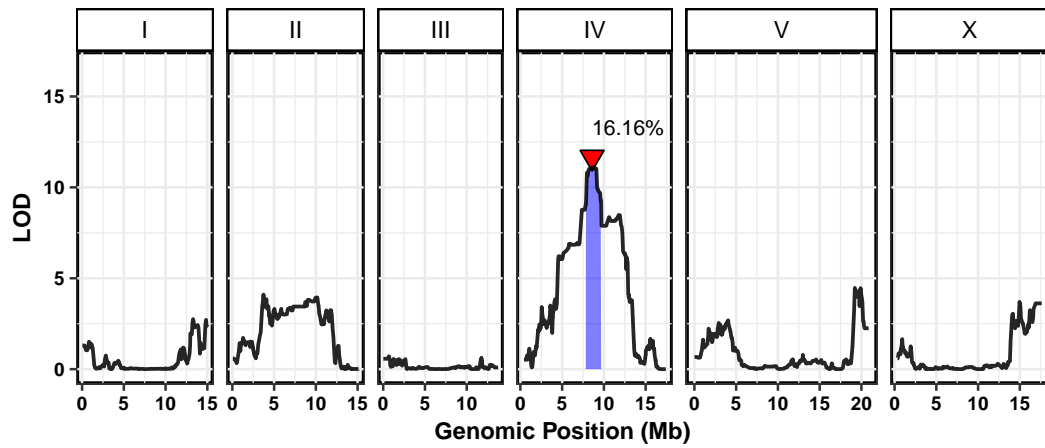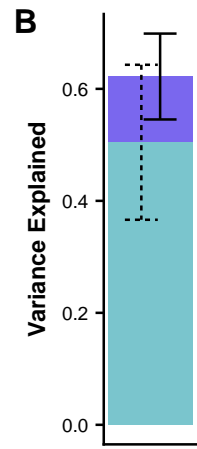

**C IV:8587439**

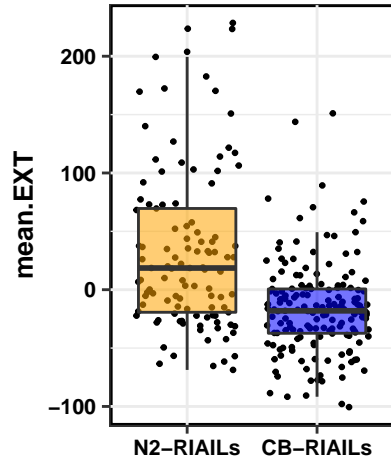

**NIL**

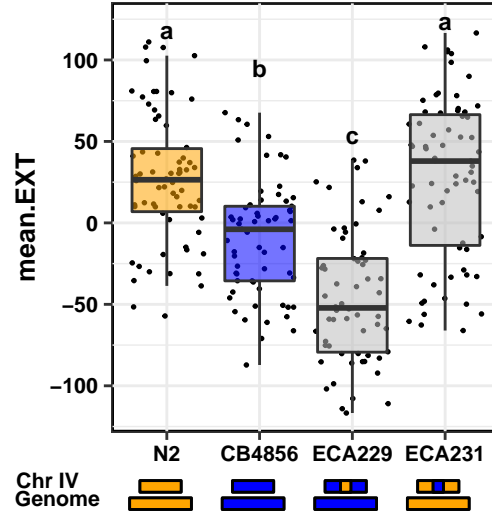

**A** tunicamycin.mean.norm.EXT

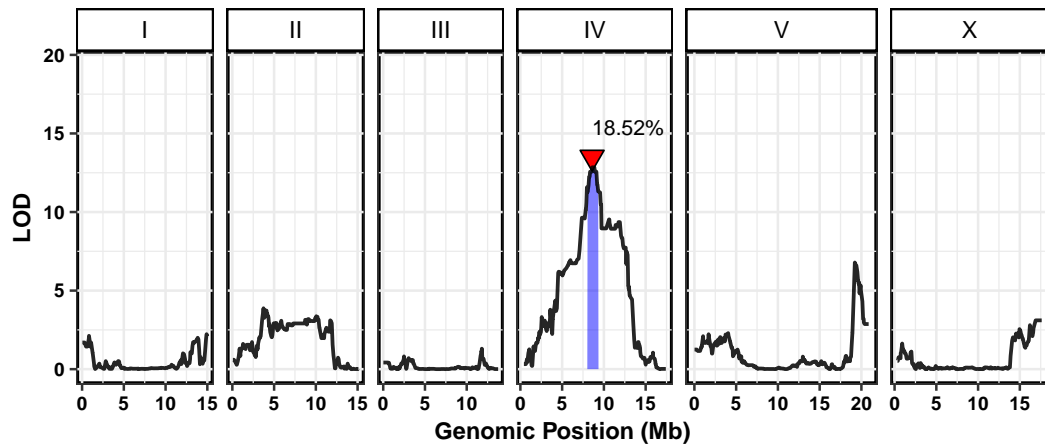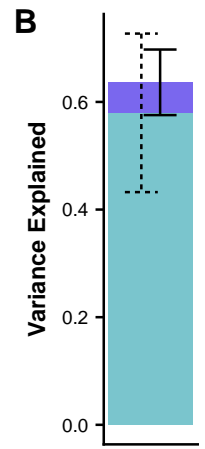

**C** IV:8587439

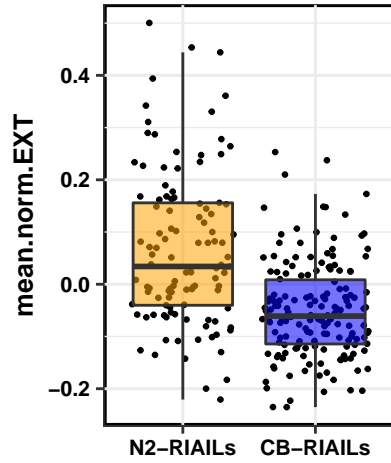

NIL

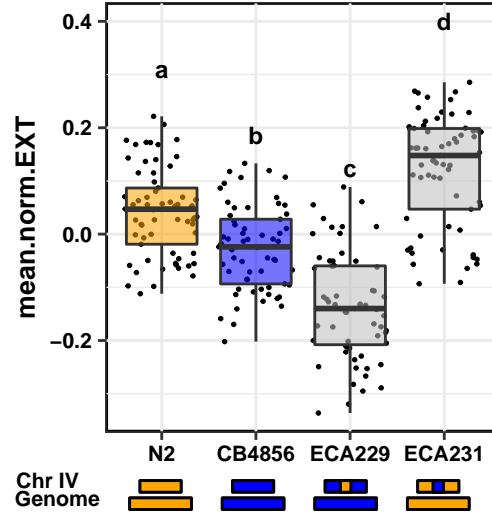

**A tunicamycin.mean.TOF**

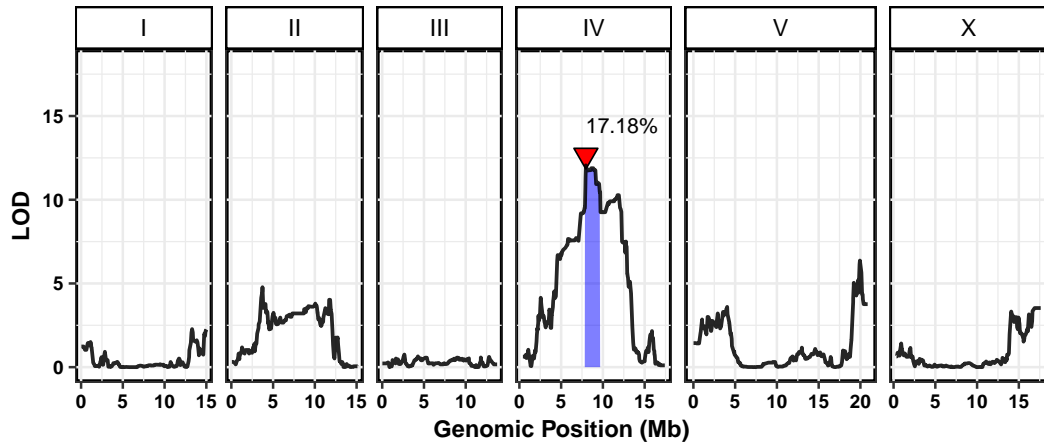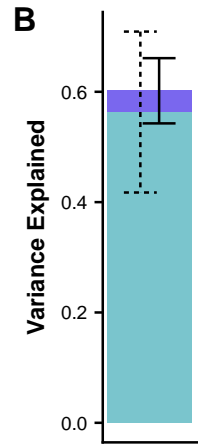

**C IV:7963446**

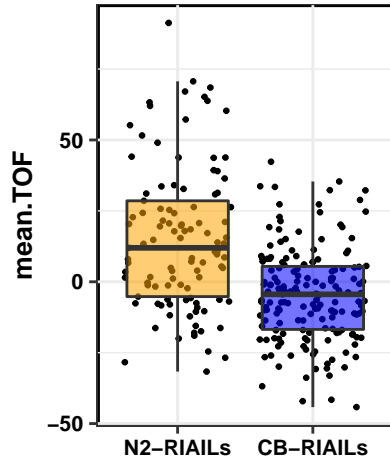

**NIL**

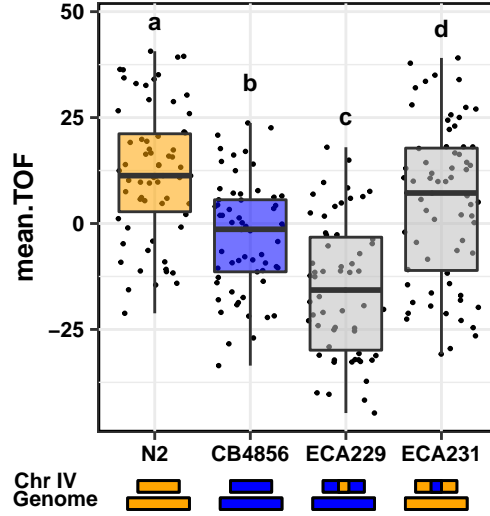

**A tunicamycin.median.EXT**

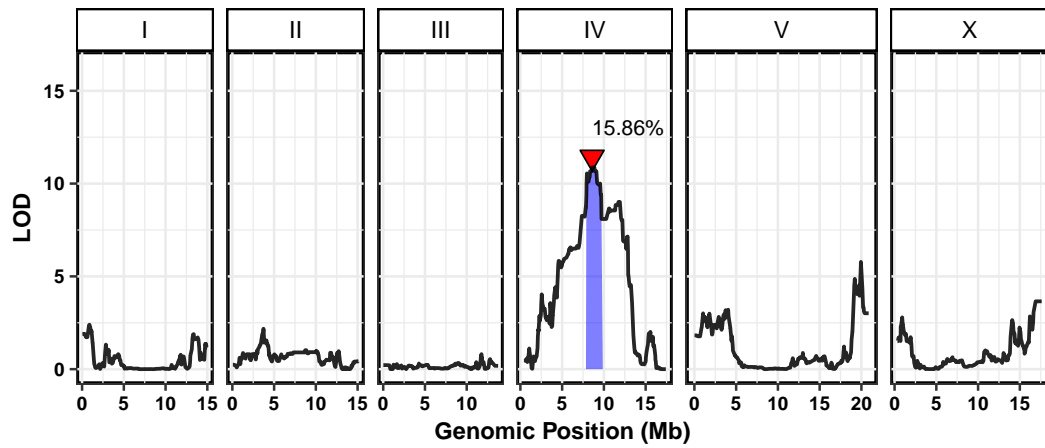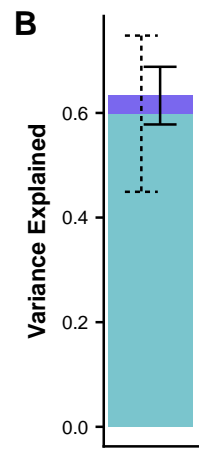

**C IV:8587439**

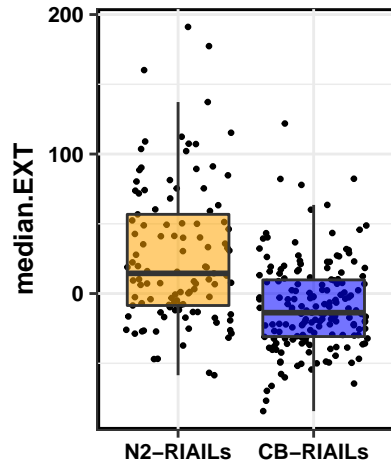

**NIL**

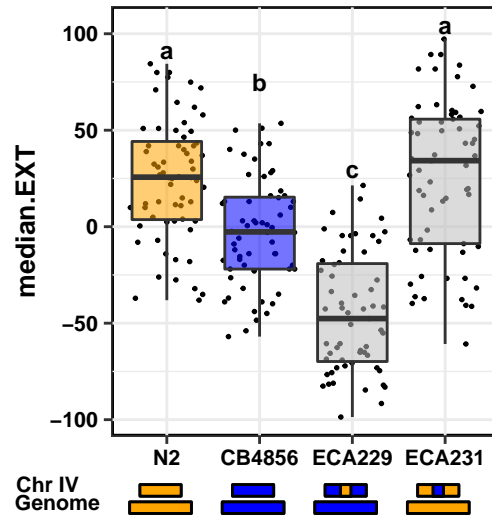

**A tunicamycin.median.norm.EXT**

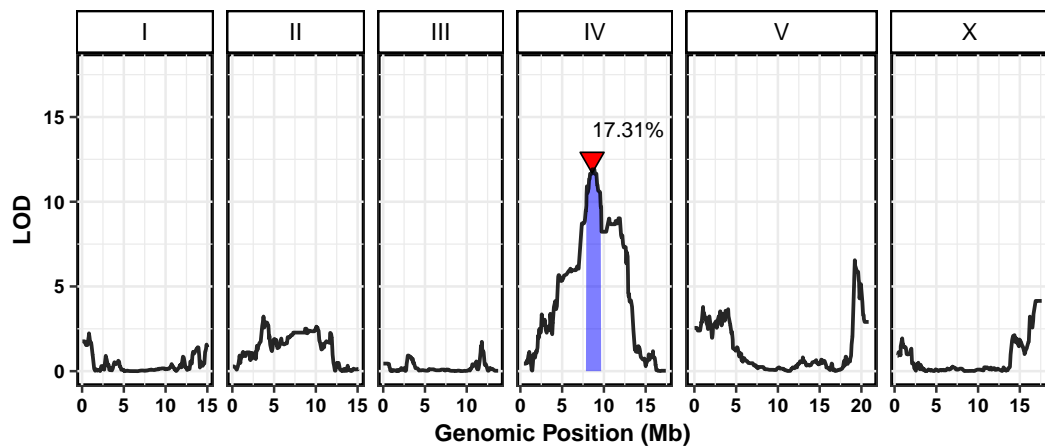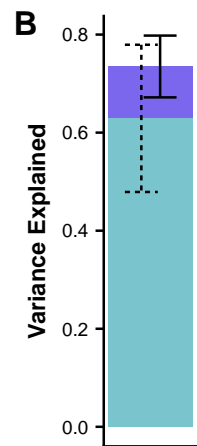

**C**

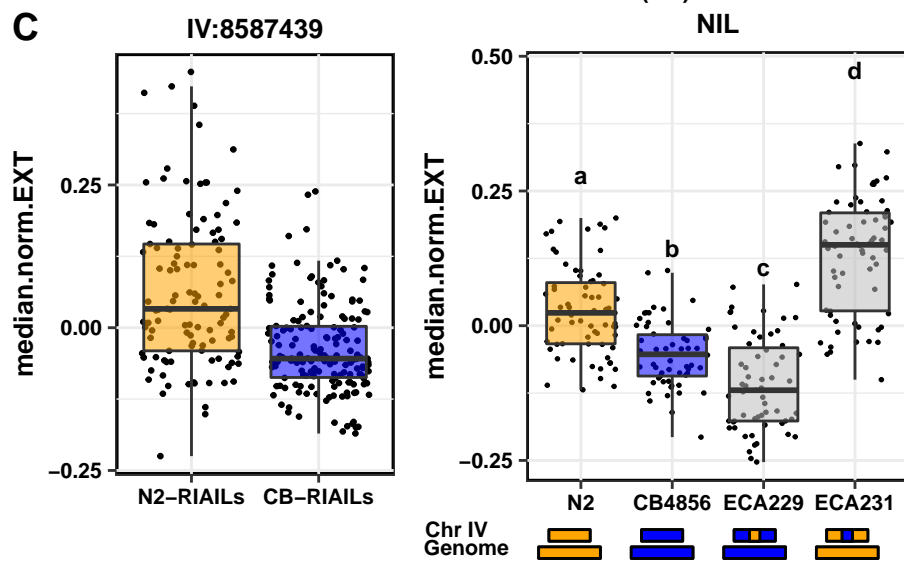

**A tunicamycin.median.TOF**

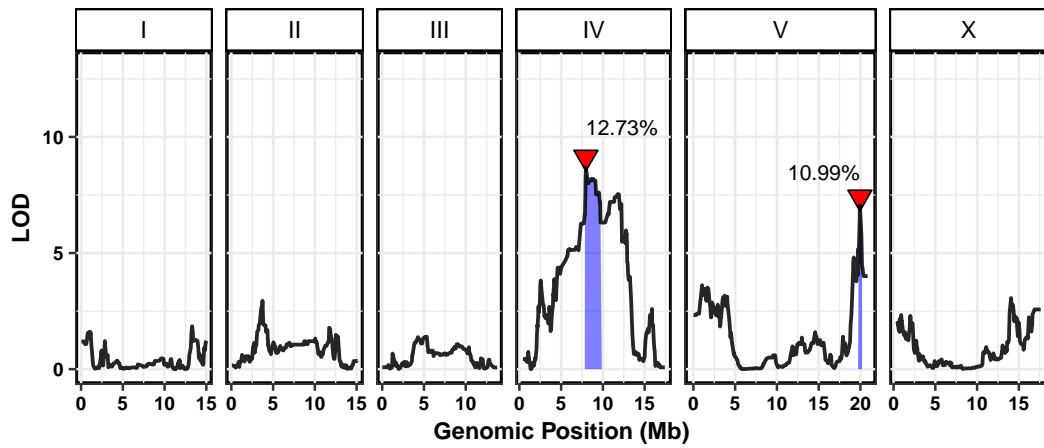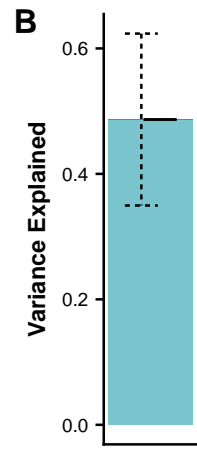

**C**

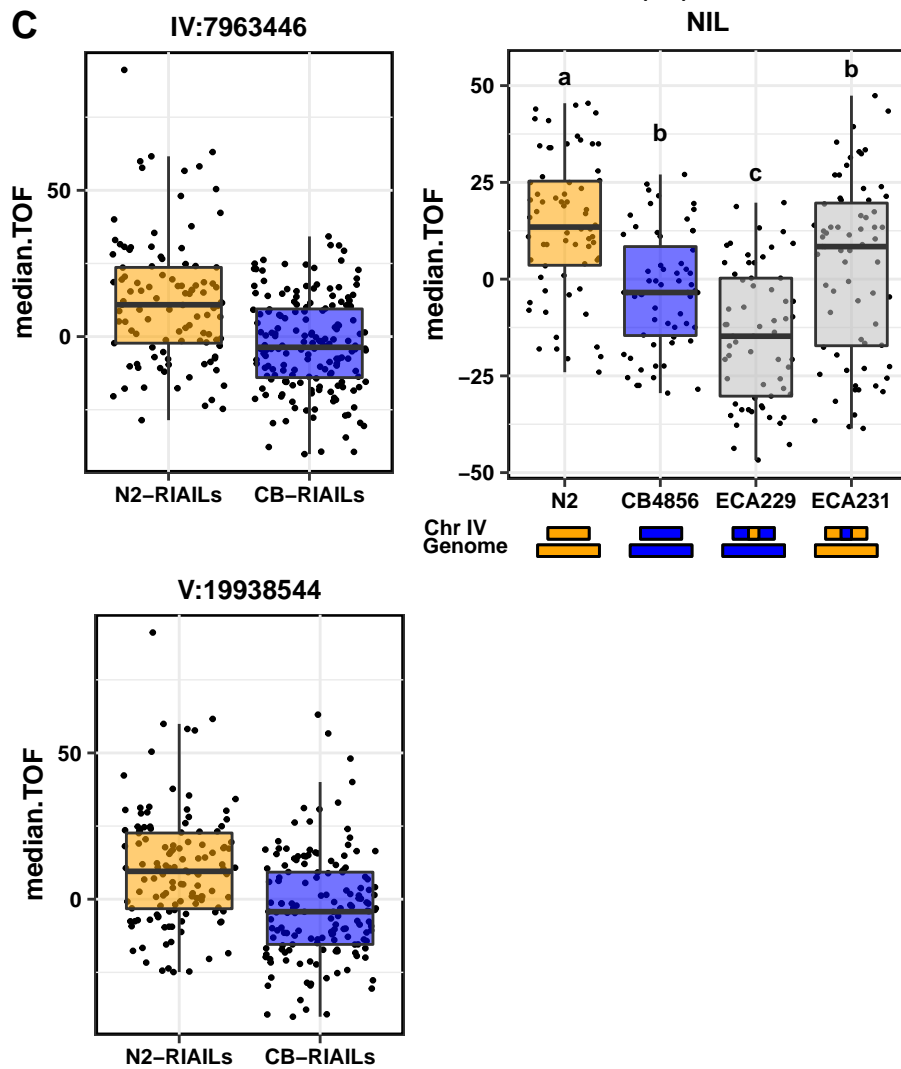

### A tunicamycin.n

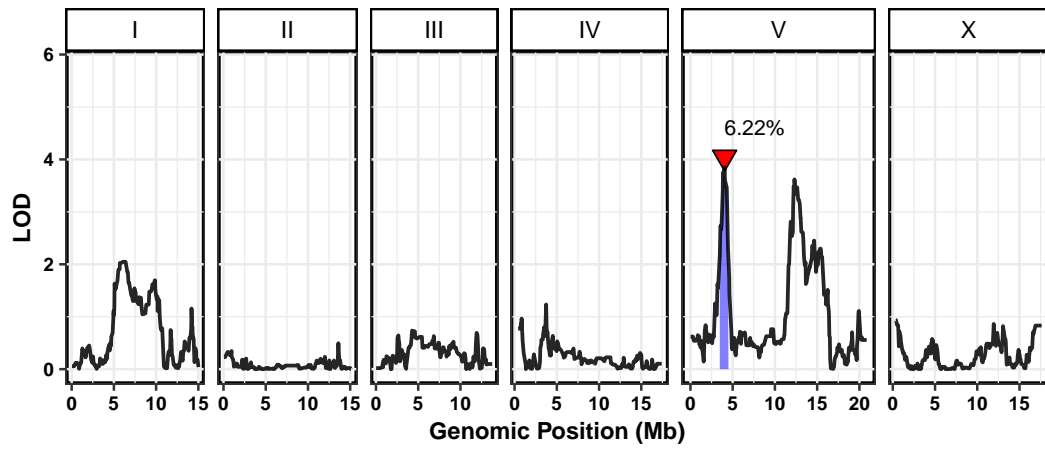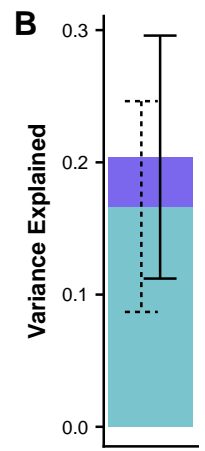

### C V:4043502

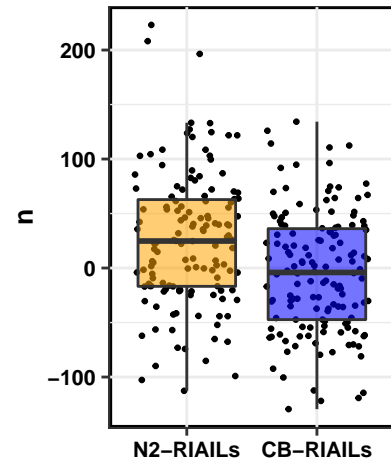

### A tunicamycin.norm.n

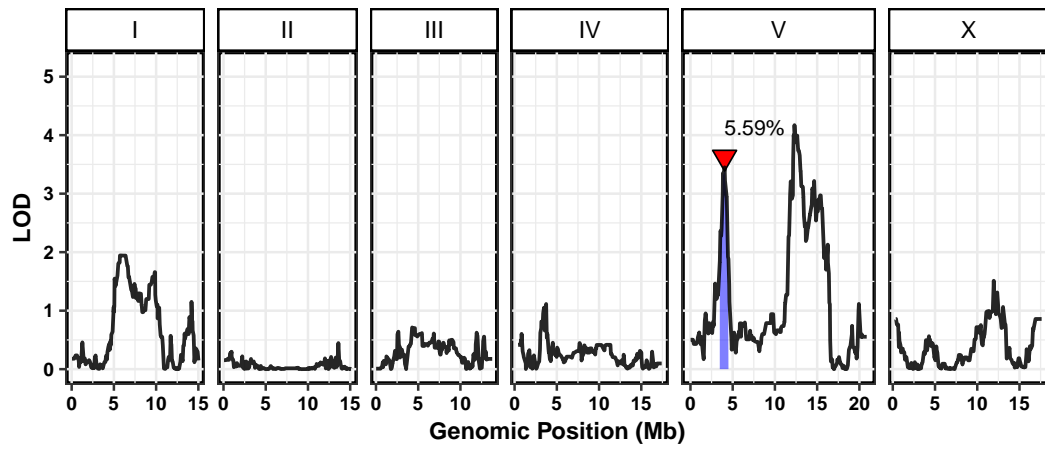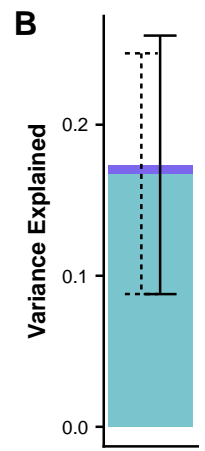

### C V:4043502

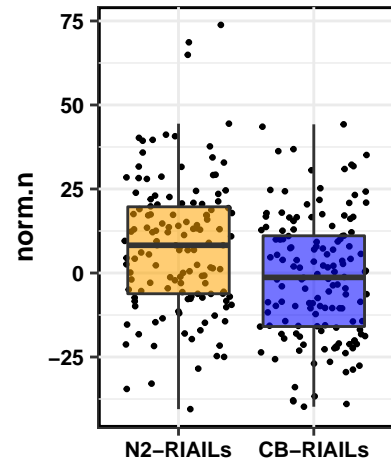



### A tunicamycin.q10.EXT

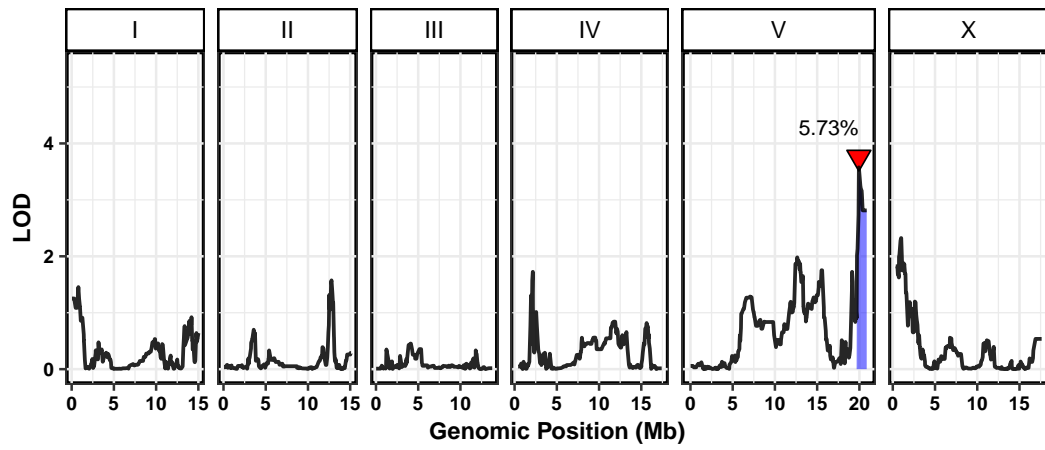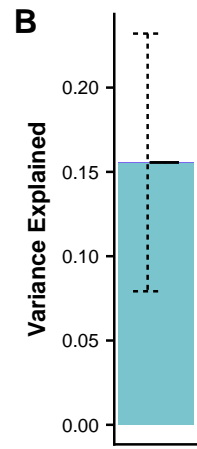

### C V:19938544

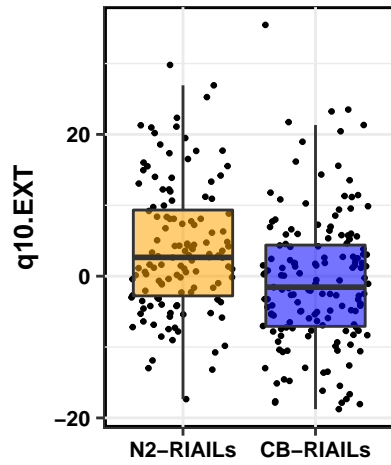

### A tunicamycin.q10.norm.EXT

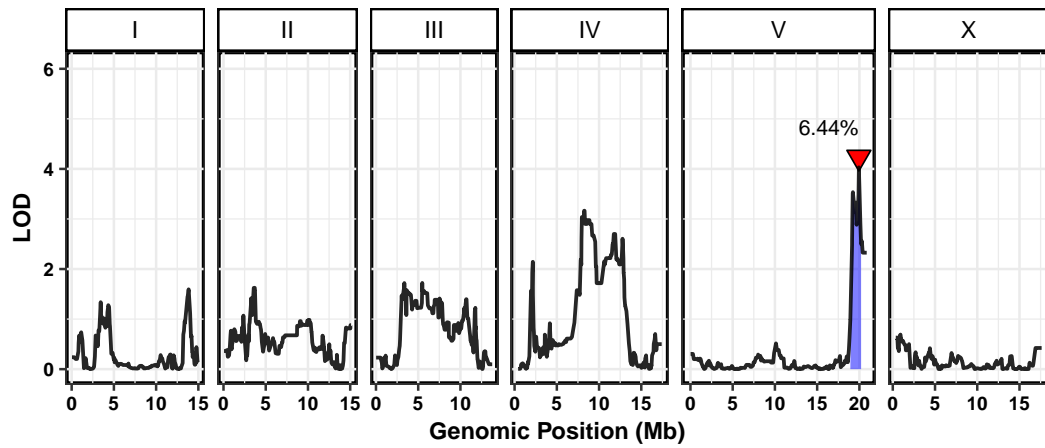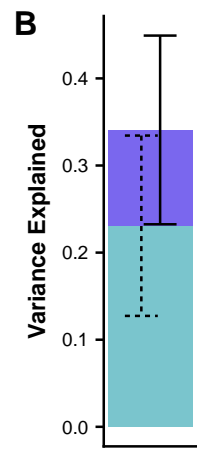

### C

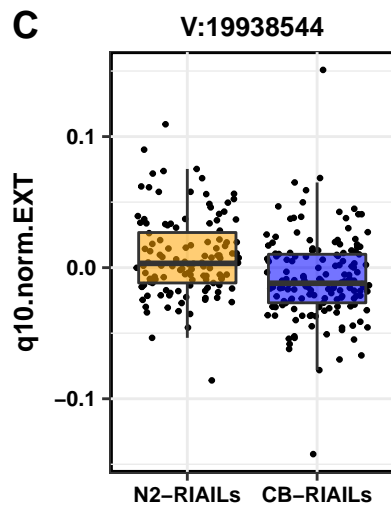

**A** tunicamycin.q10.TOF

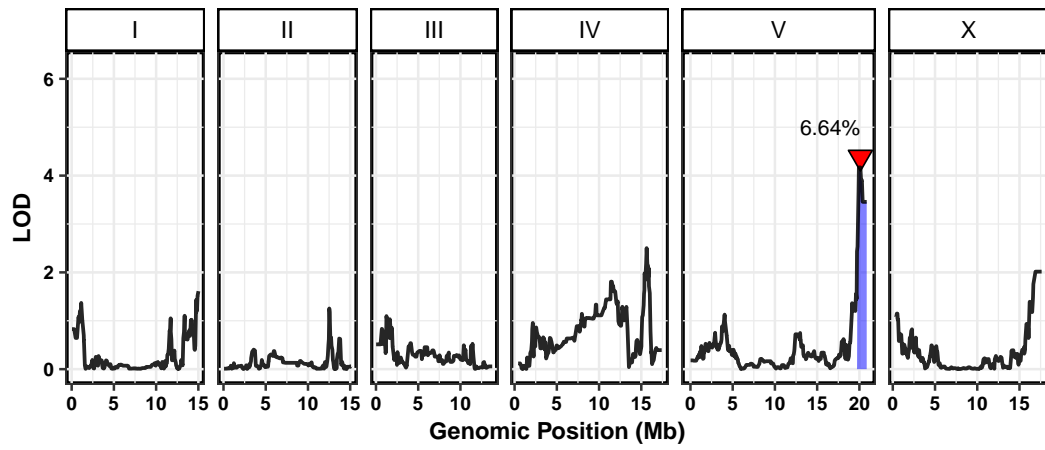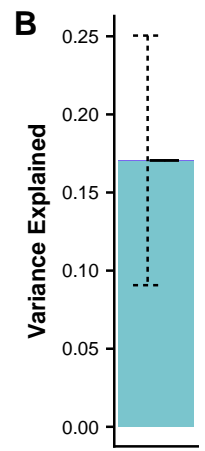

**C** V:20117398

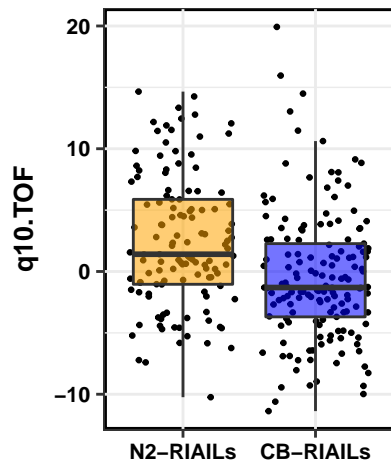

**A tunicamycin.q25.EXT**

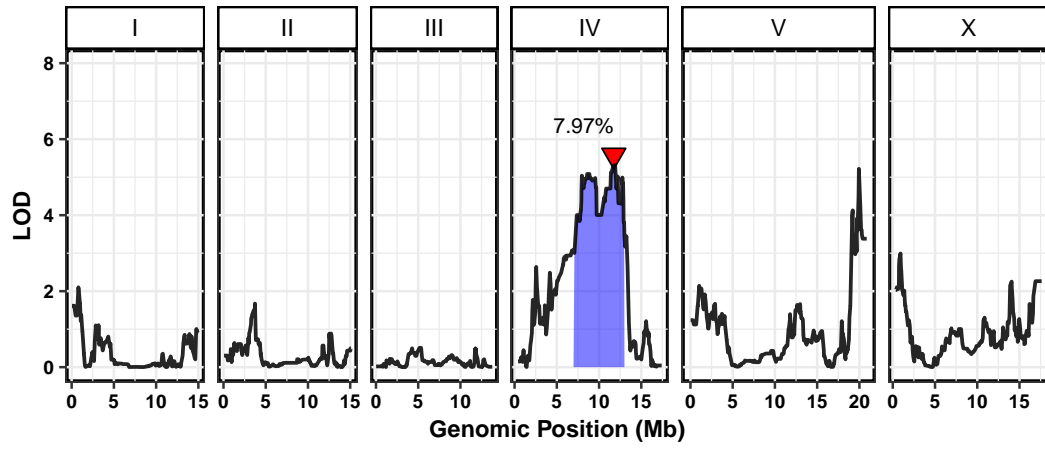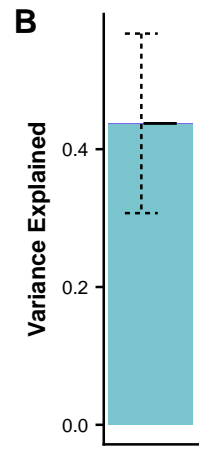

**C IV:11747270**

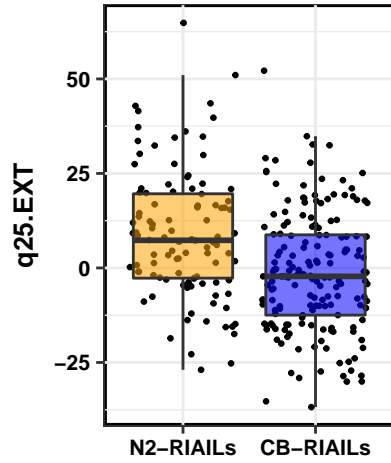

**NIL**

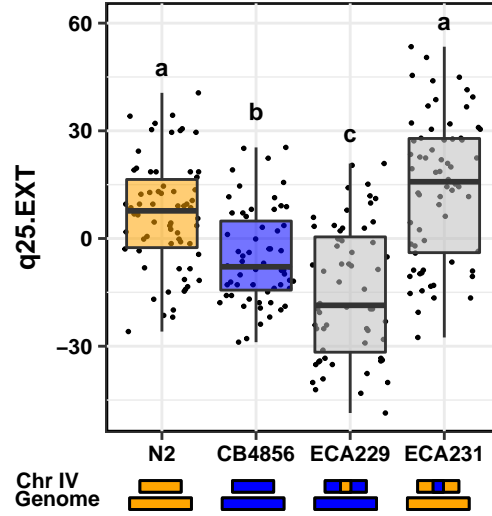

**A** tunicamycin.q25.norm.EXT

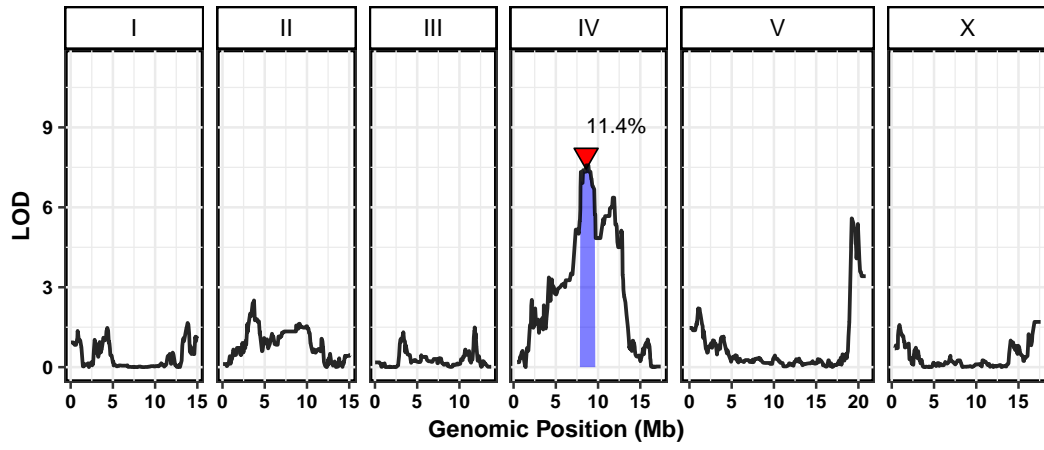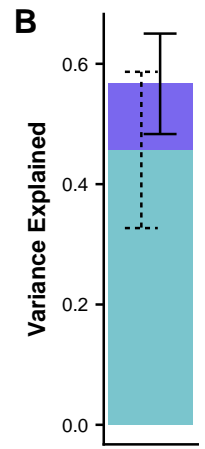

**C**

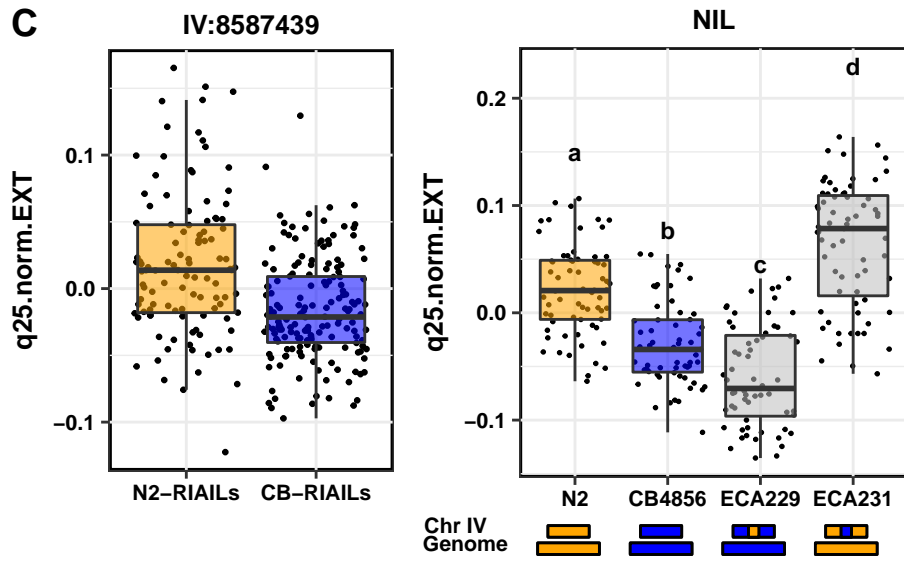

**A** tunicamycin.q25.TOF

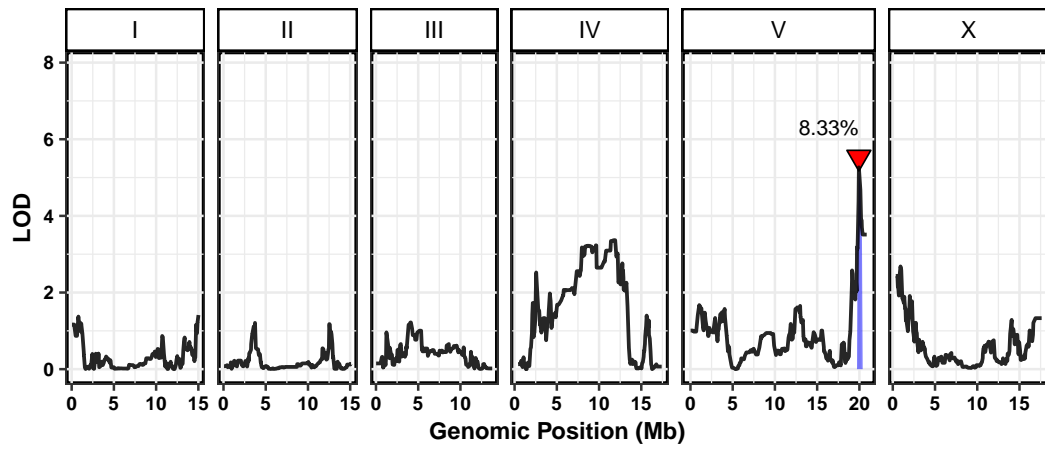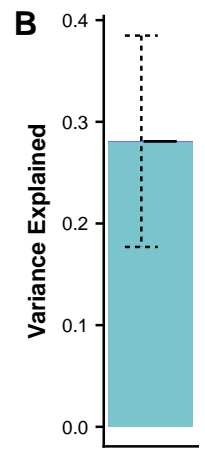

**C** V:19938544

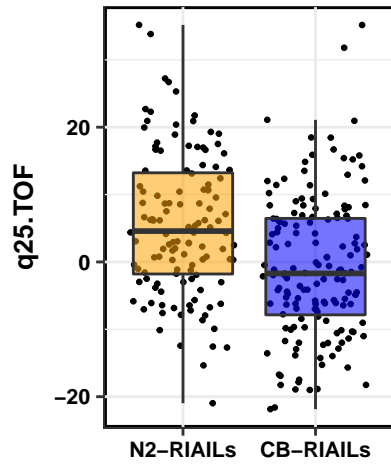

**A tunicamycin.q75.EXT**

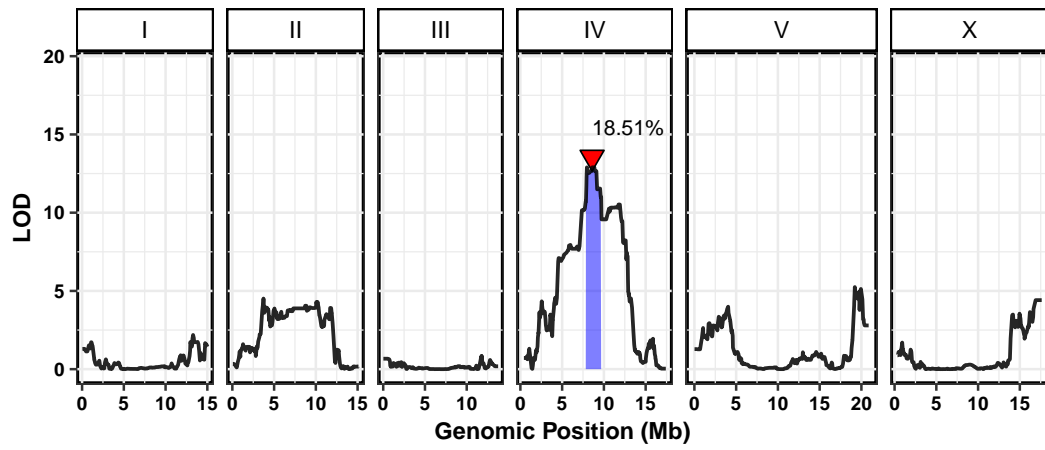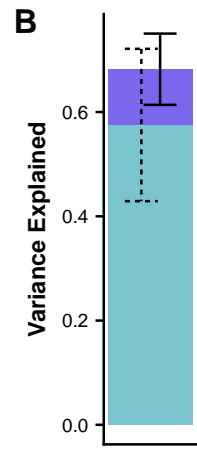

**C**

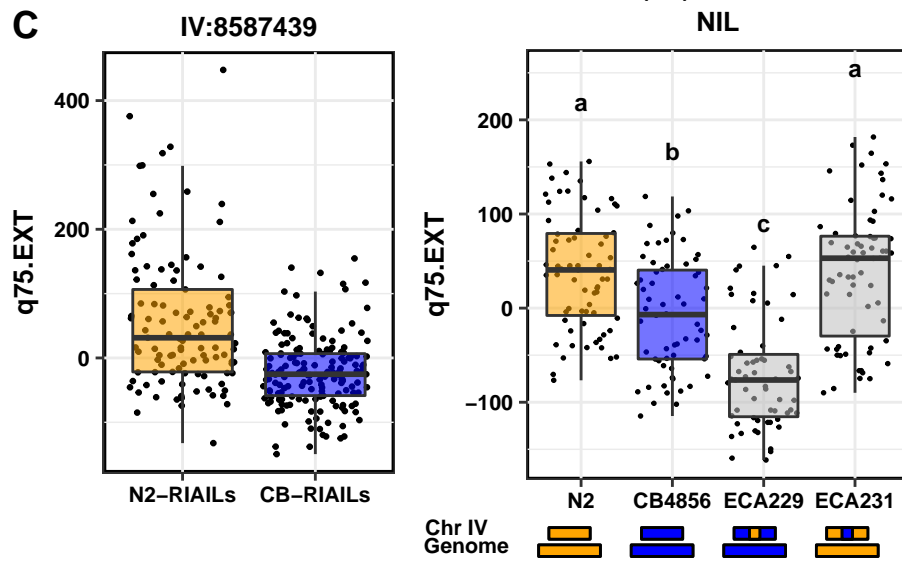

**A** tunicamycin.q75.norm.EXT

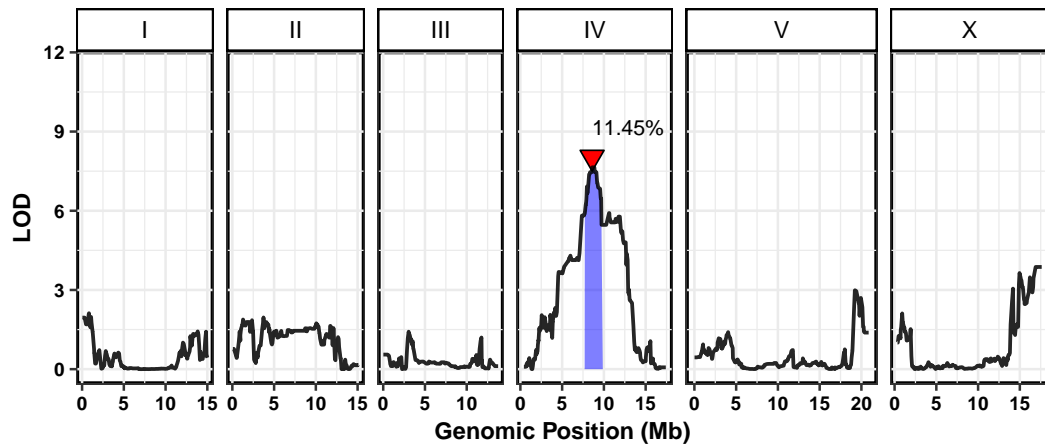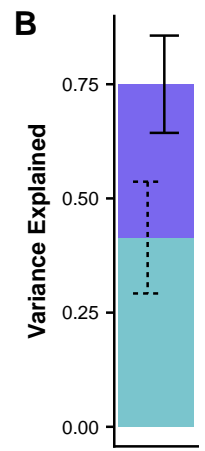

**C**

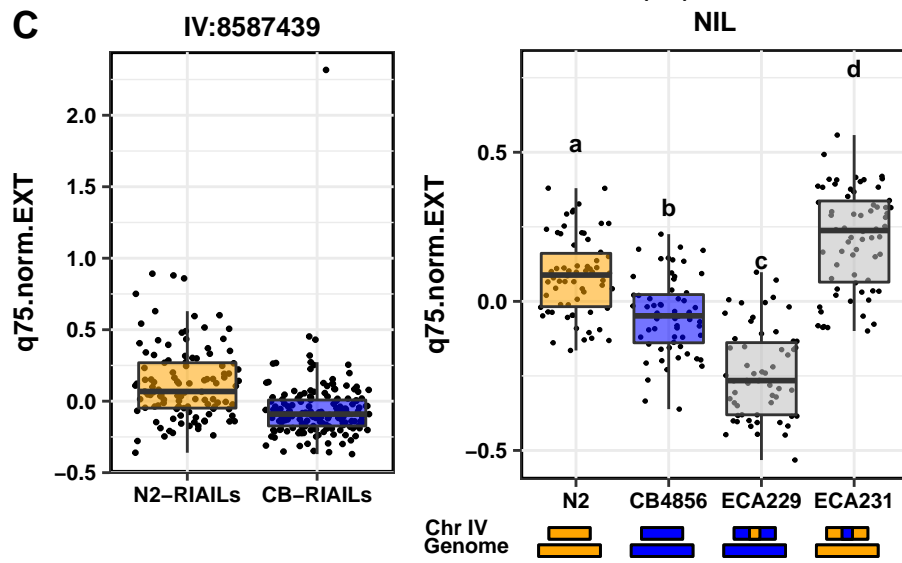



**A tunicamycin.q75.TOF**

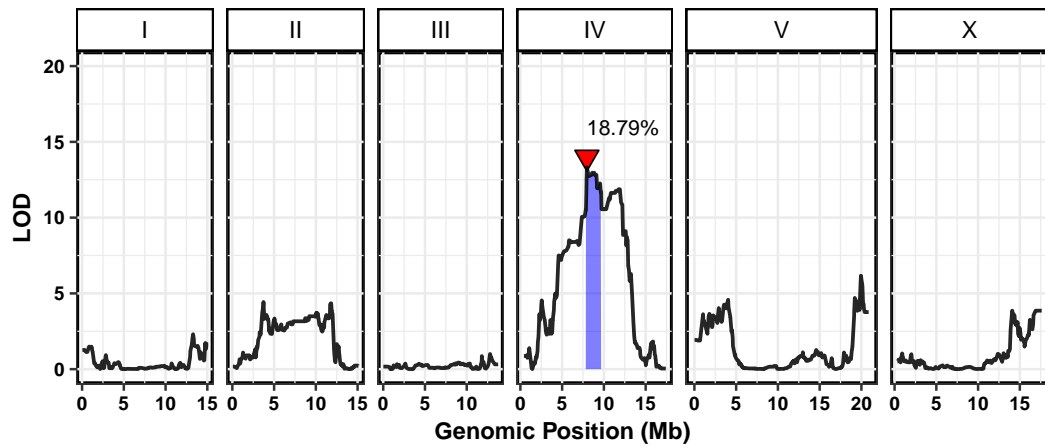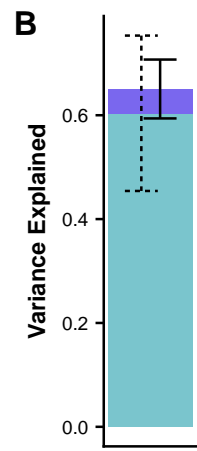

**C IV:7963446**

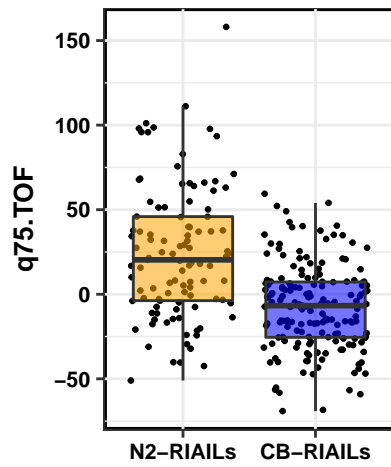

**NIL**

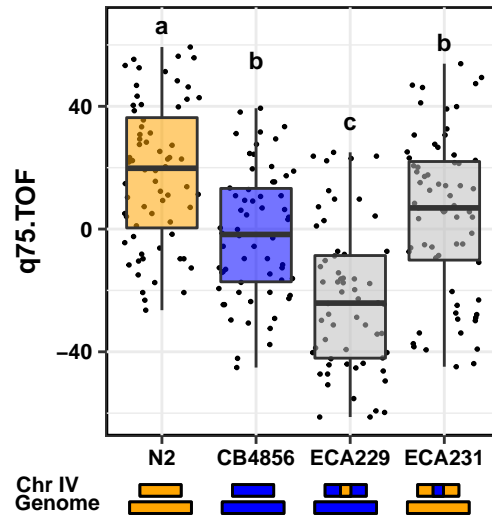

**A tunicamycin.q90.EXT**

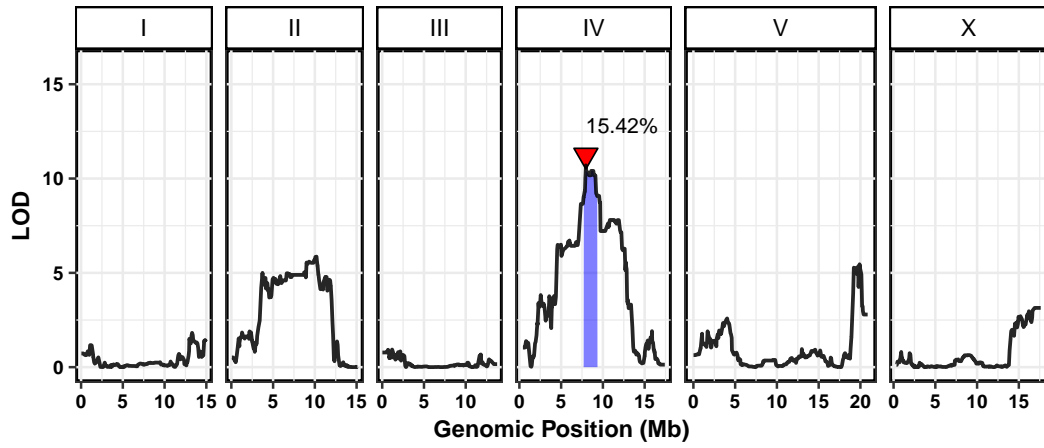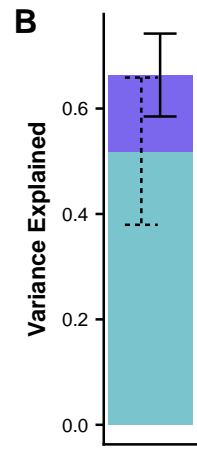

**C IV:7963446**

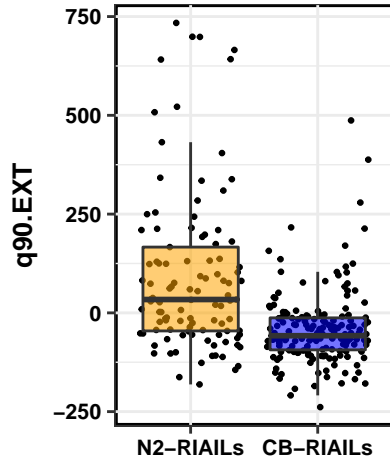

**NIL**

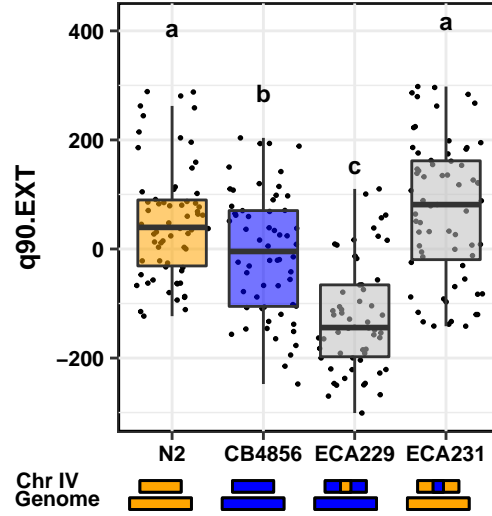

**A** tunicamycin.q90.norm.EXT

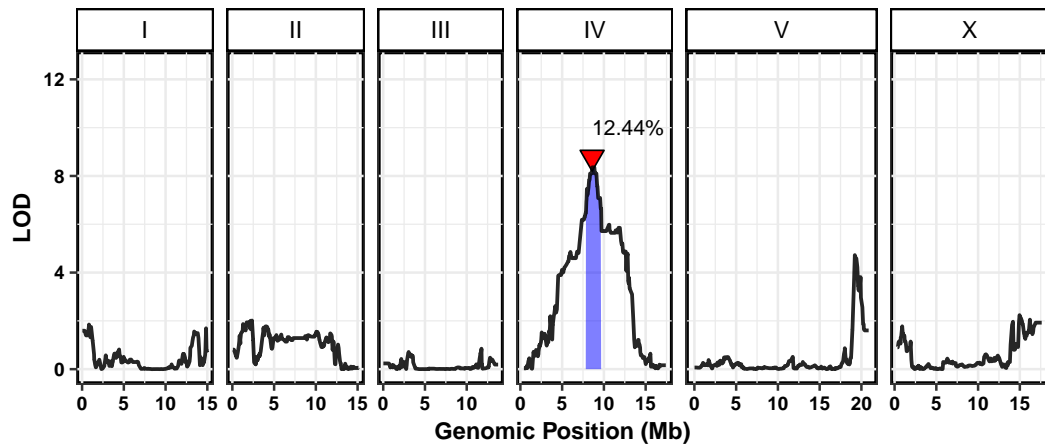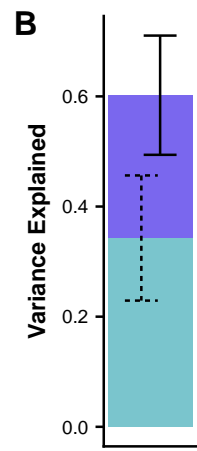

**C** IV:8587439

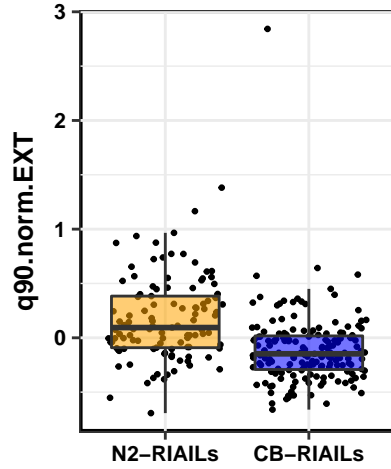

NIL

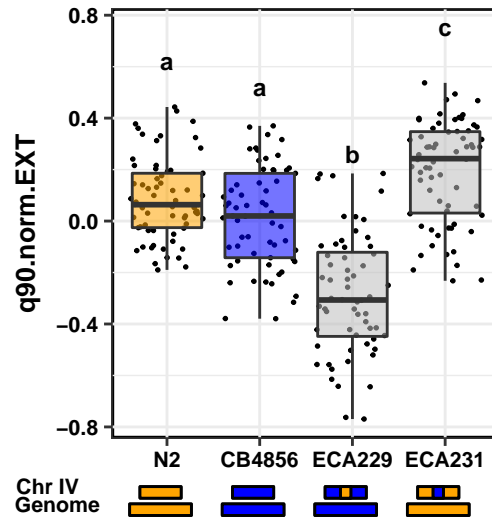

**A** tunicamycin.q90.TOF

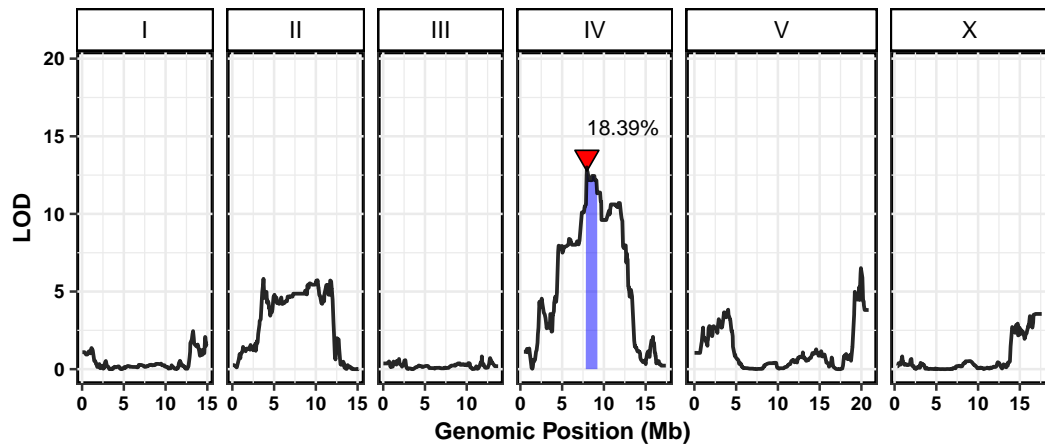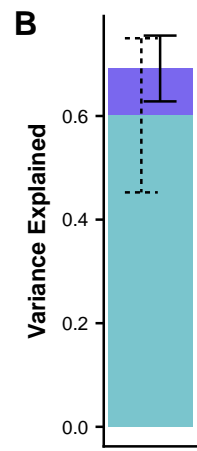

**C**

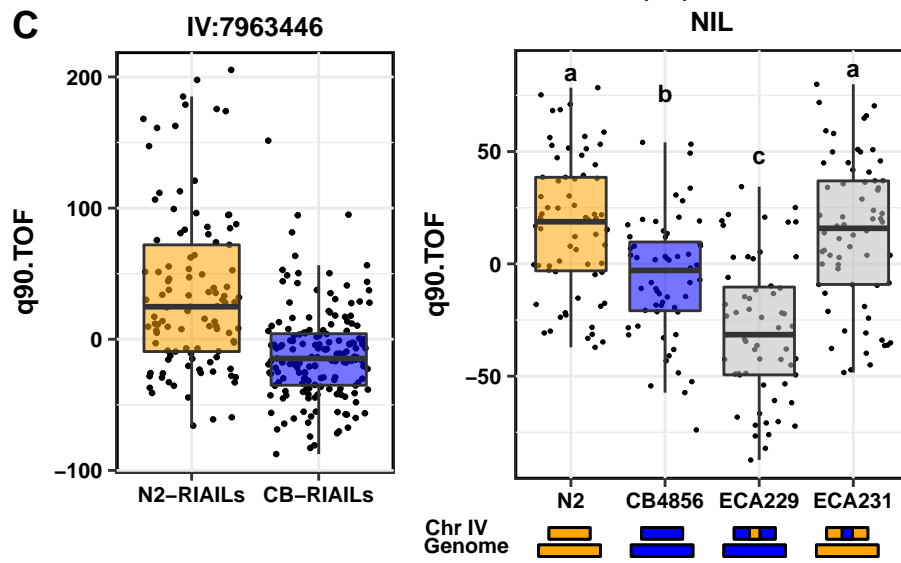

**A** tunicamycin.var.TOF

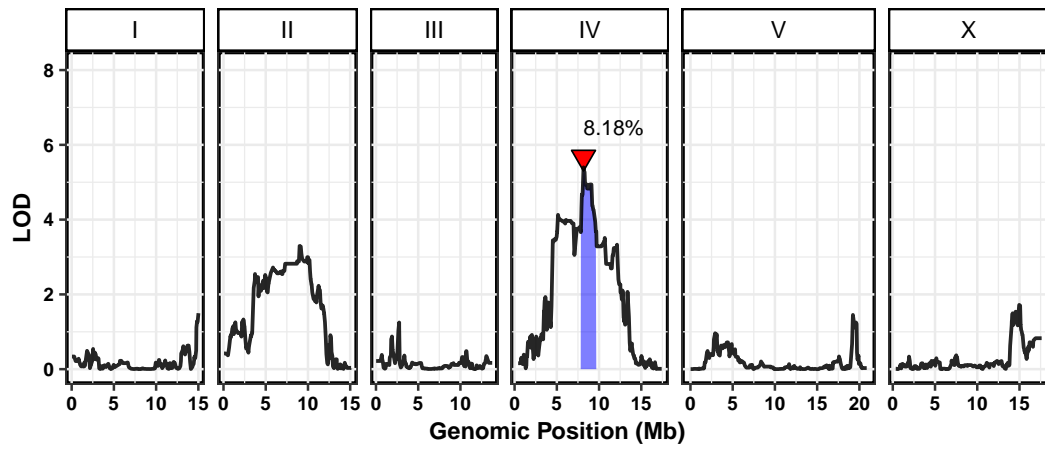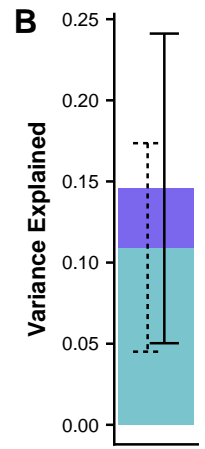

**C** IV:8162297

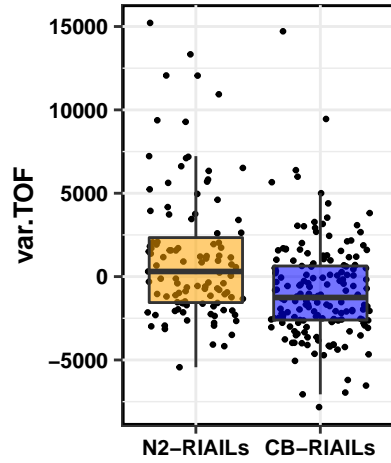

NIL

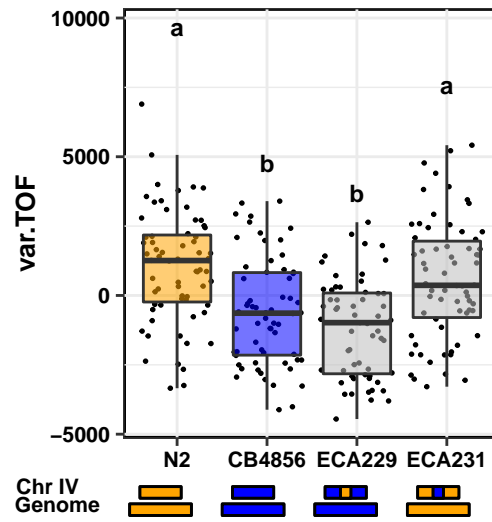

### A vincristine.cv.EXT

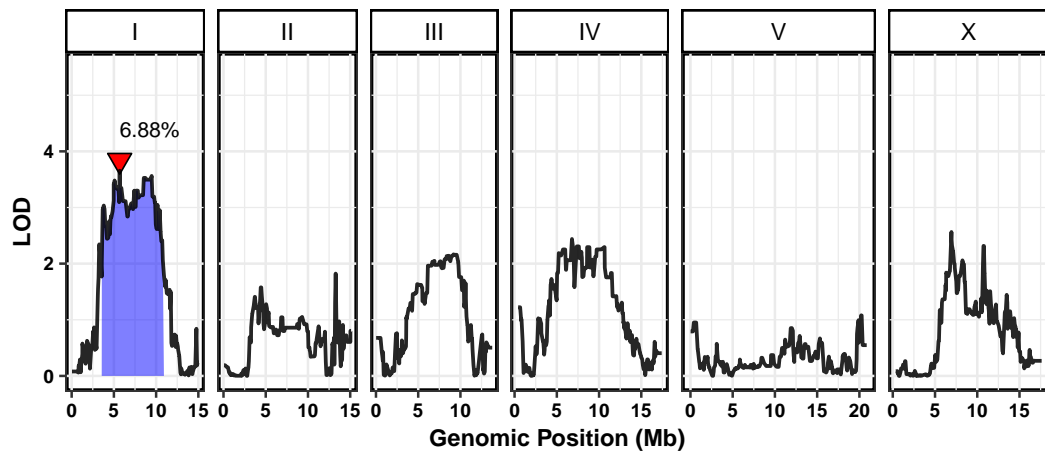

### B

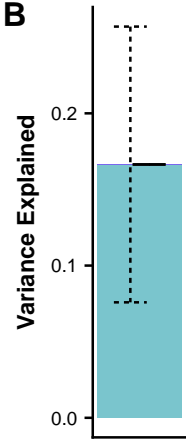

### C

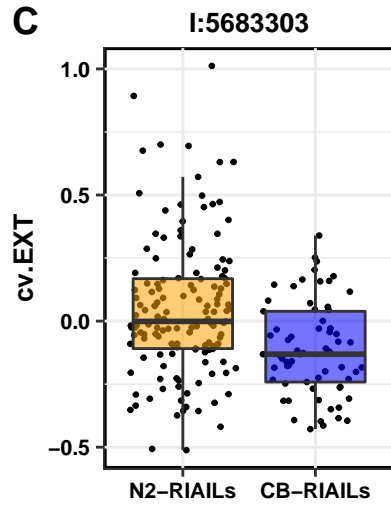

### A vincristine.mean.EXT

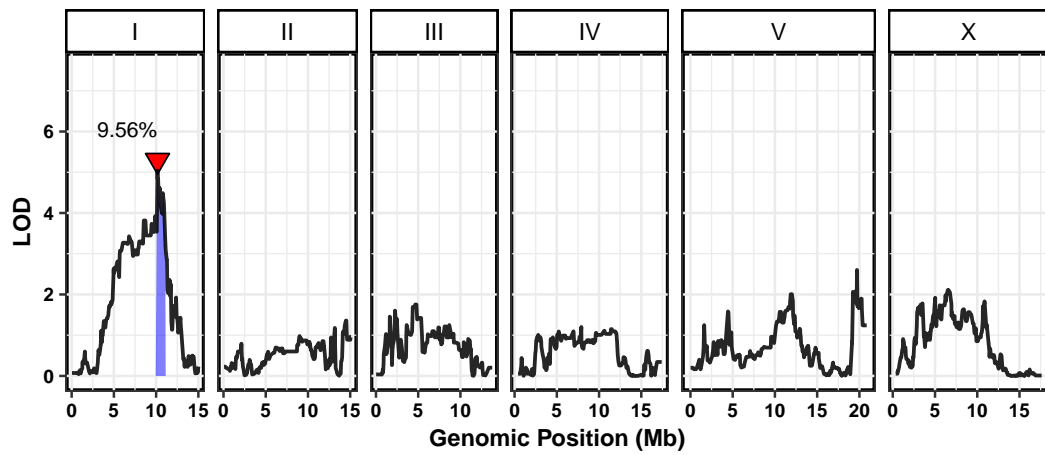

### B

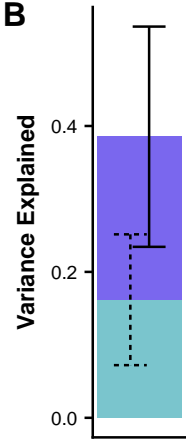

### C

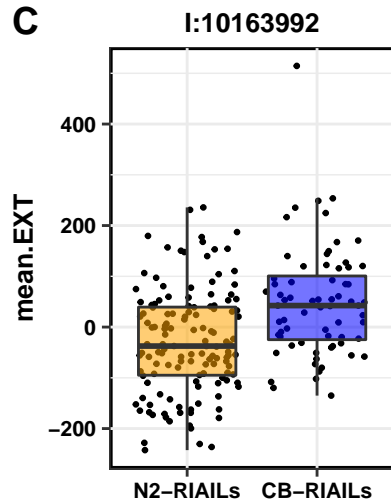

### A vincristine.mean.norm.EXT

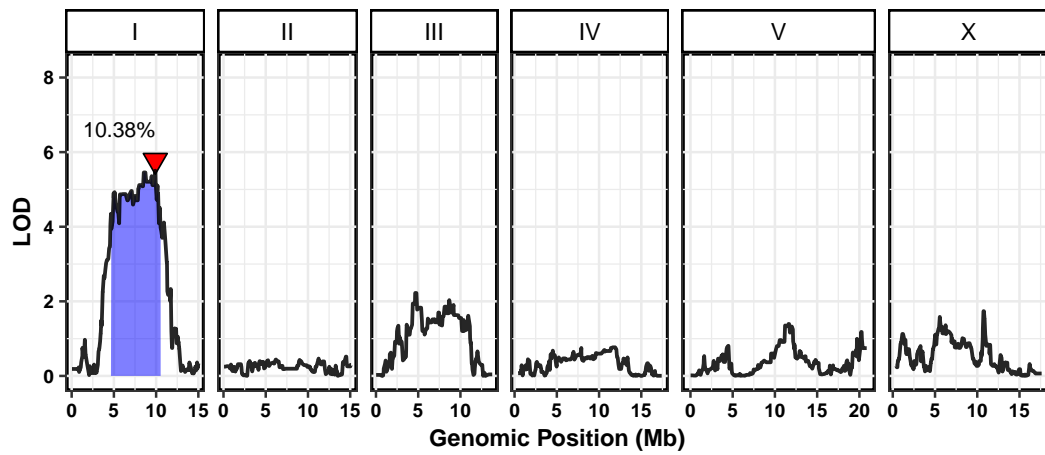

### B

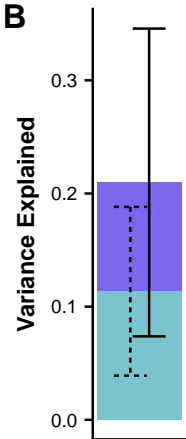

### C

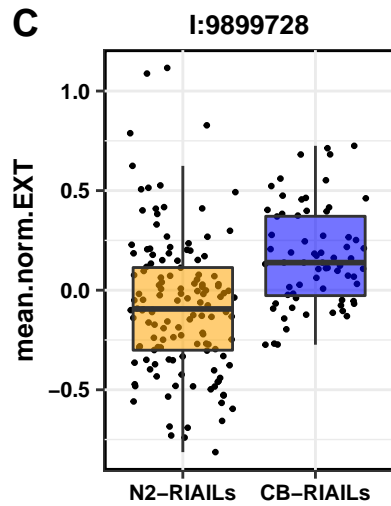



### A vincristine.median.EXT

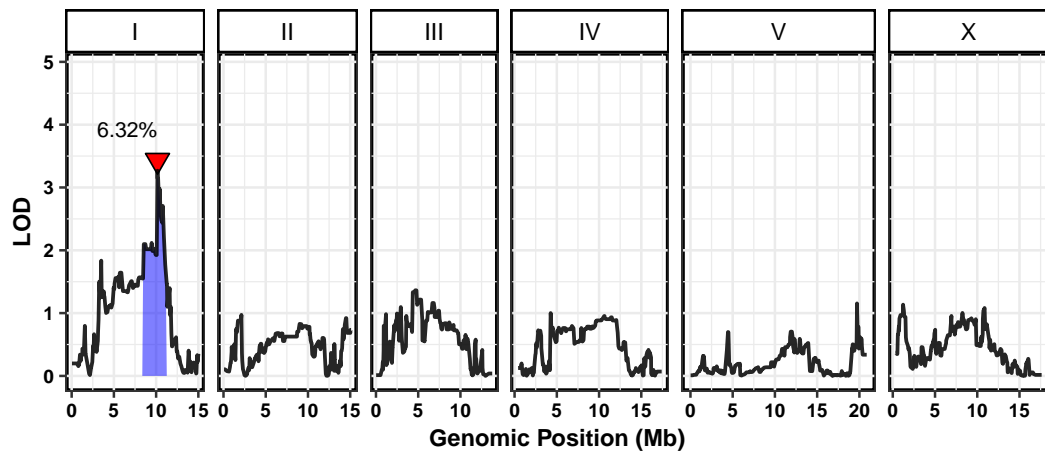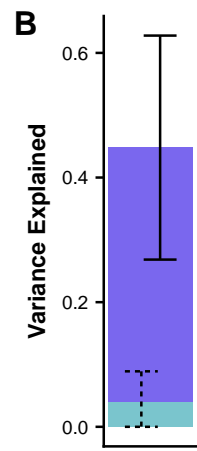

### C I:10163992

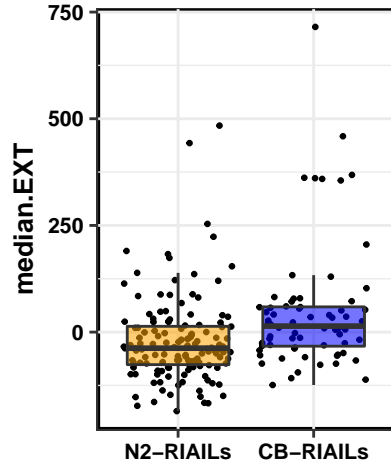

### A vincristine.median.norm.EXT

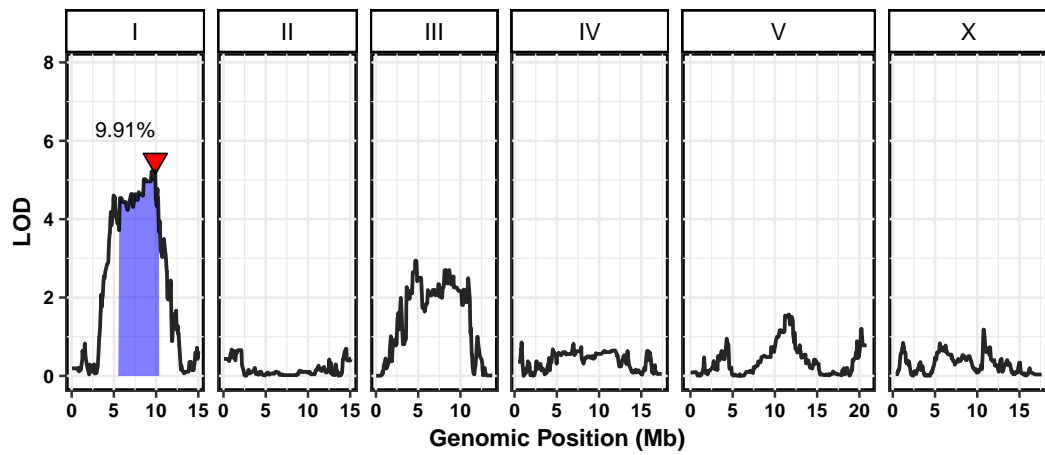

### B

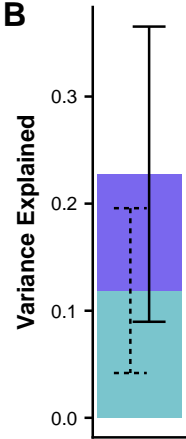

### C

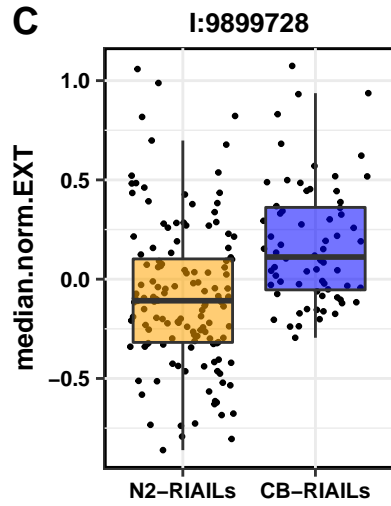

**A vincristine.n**

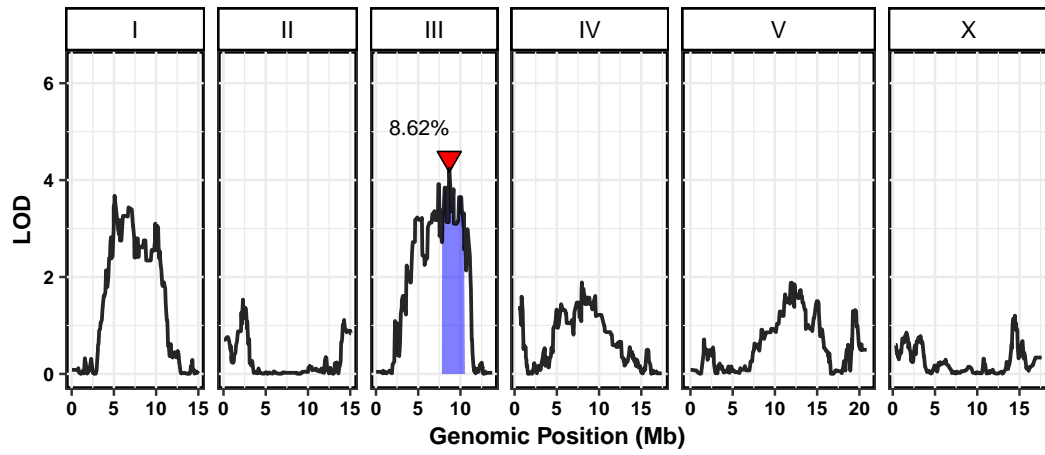

**B**

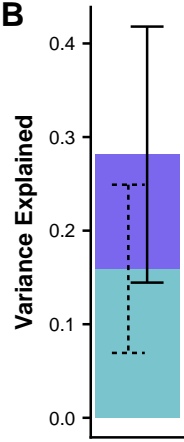

**C**

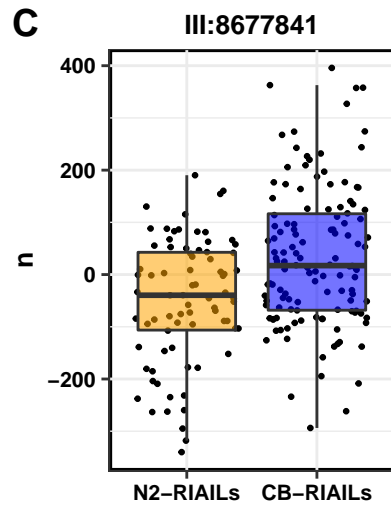

**A vincristine.norm.n**

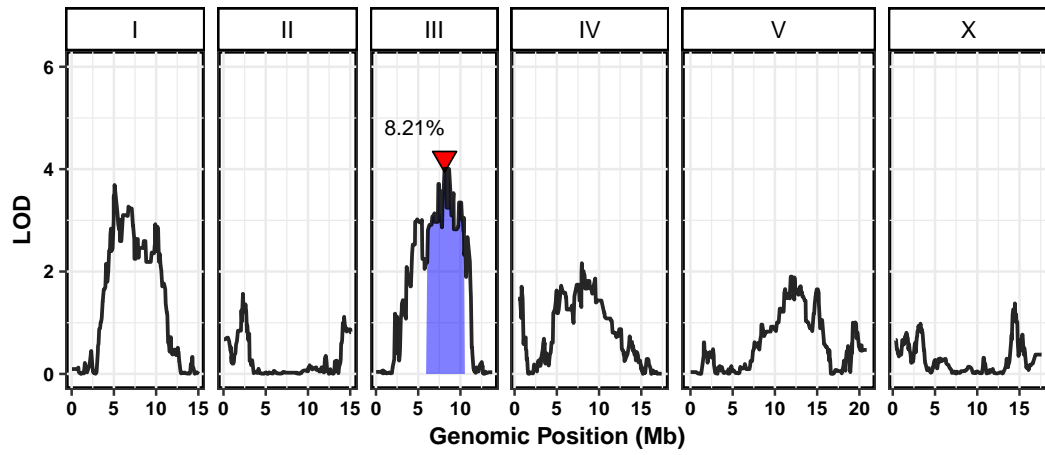

**B**

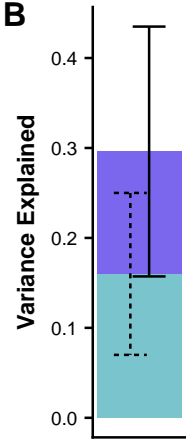

**C**

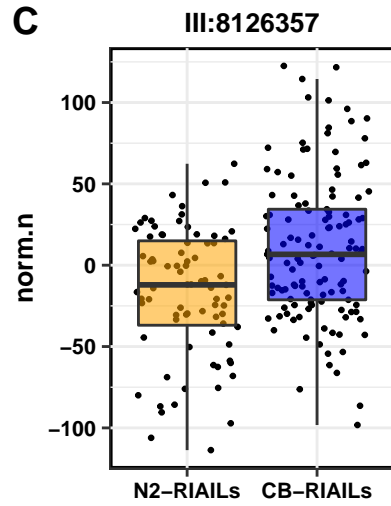

### A vincristine.q10.TOF

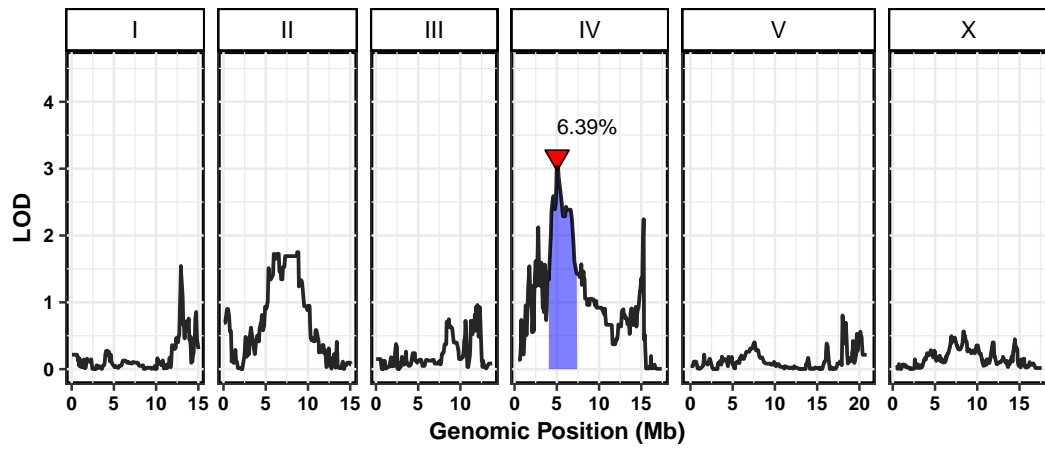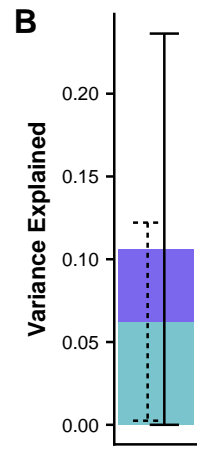

### C IV:5034091

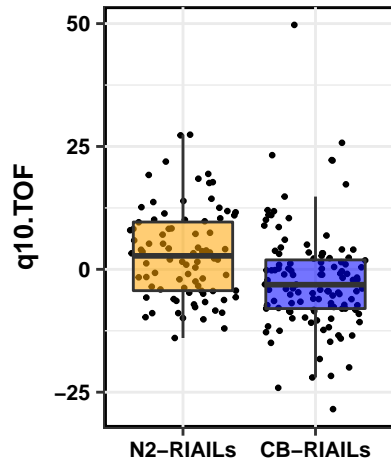

### A vincristine.q25.TOF

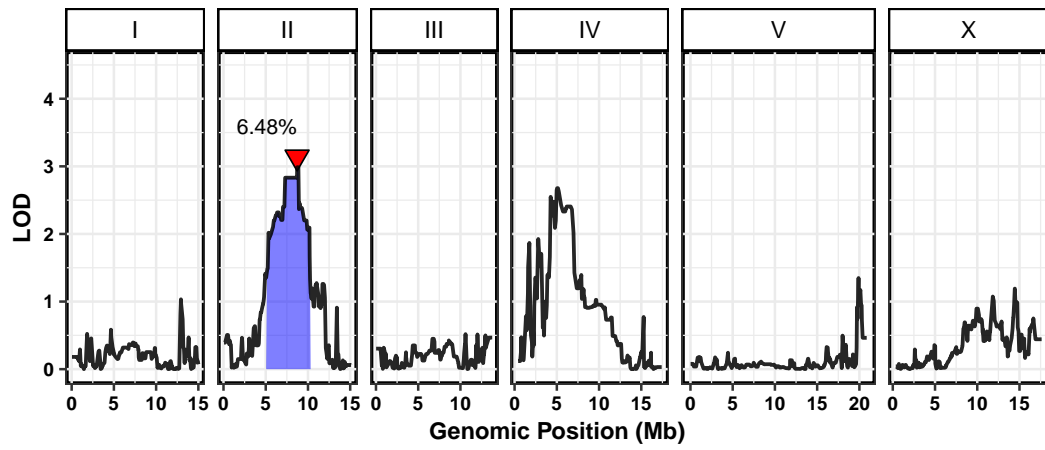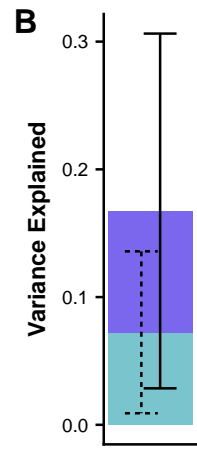

### C

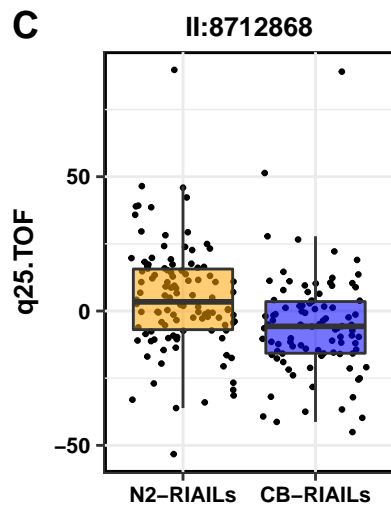

### A vincristine.q75.EXT

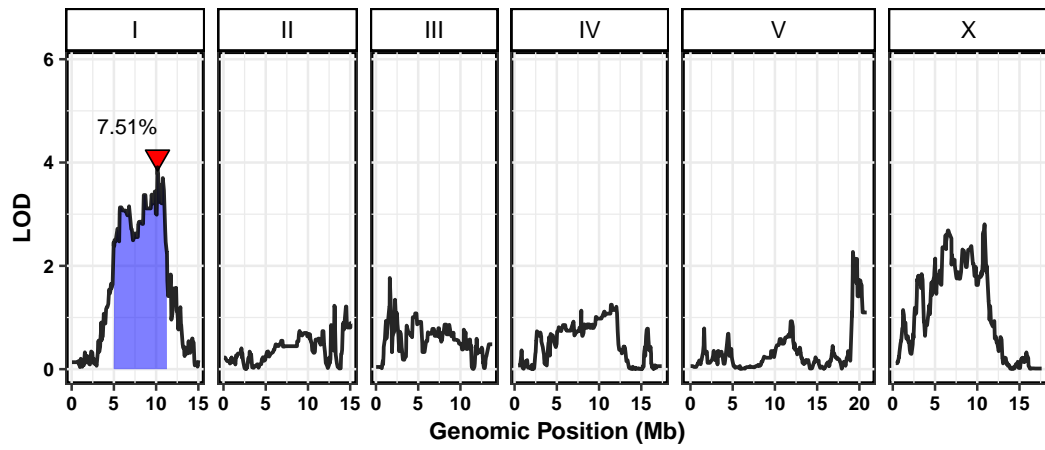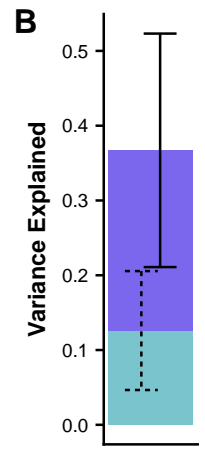

### C

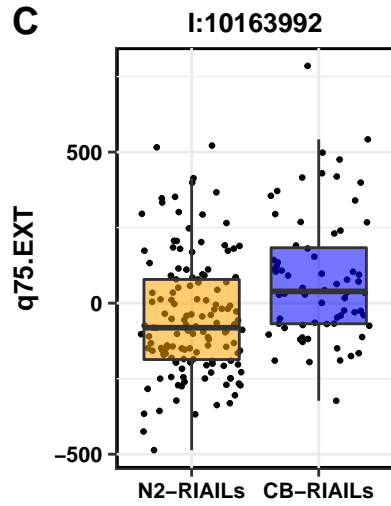

### A vincristine.q75.norm.EXT

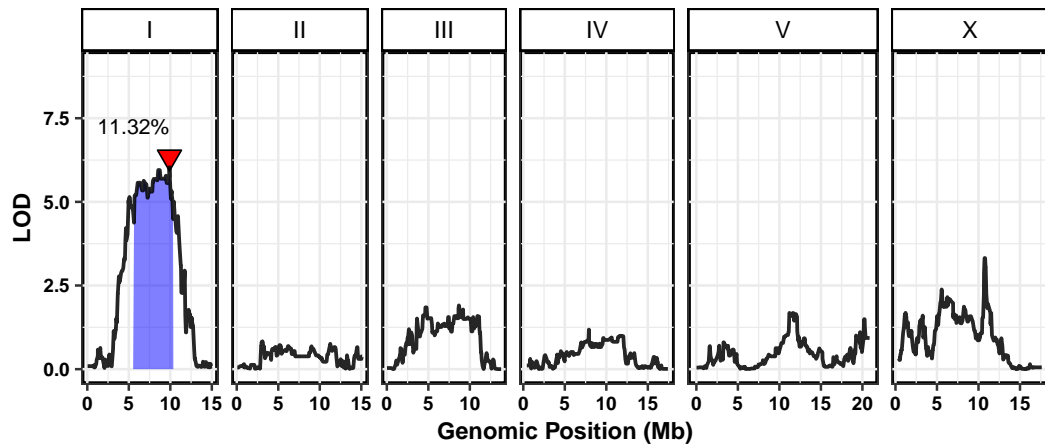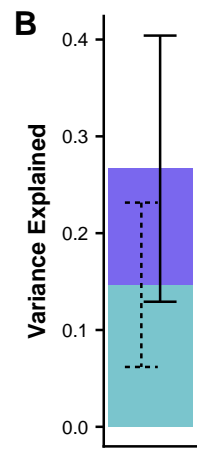

### C I:9899728

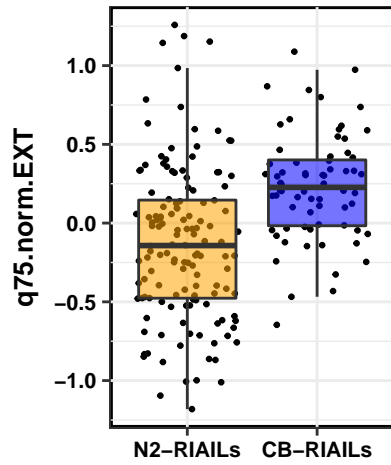



**A vincristine.q90.EXT**

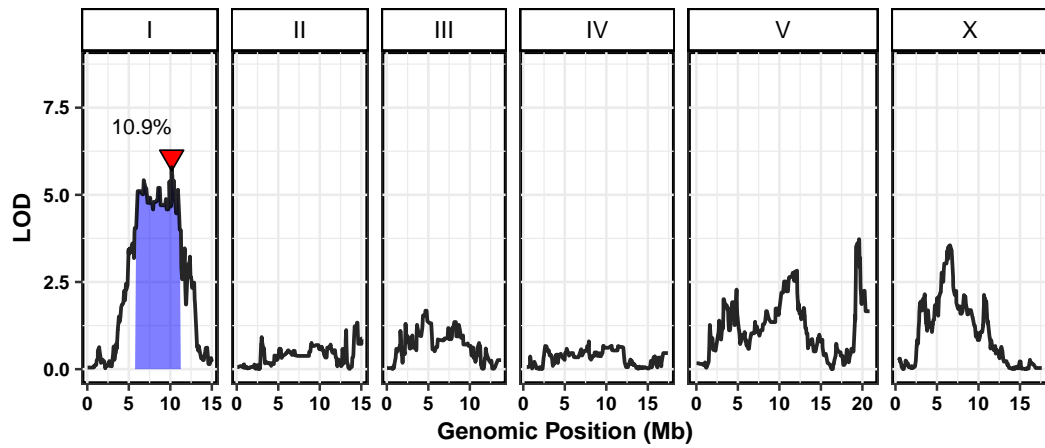

**B**

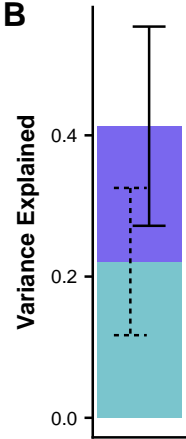

**C**

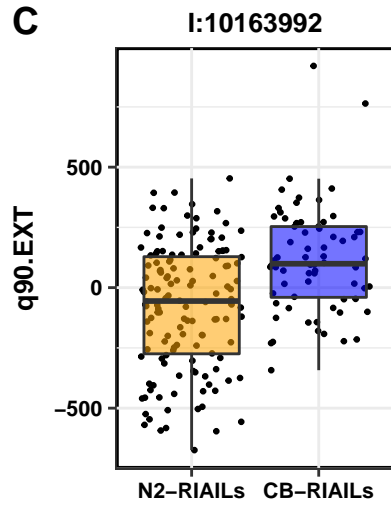

### A vincristine.q90.norm.EXT

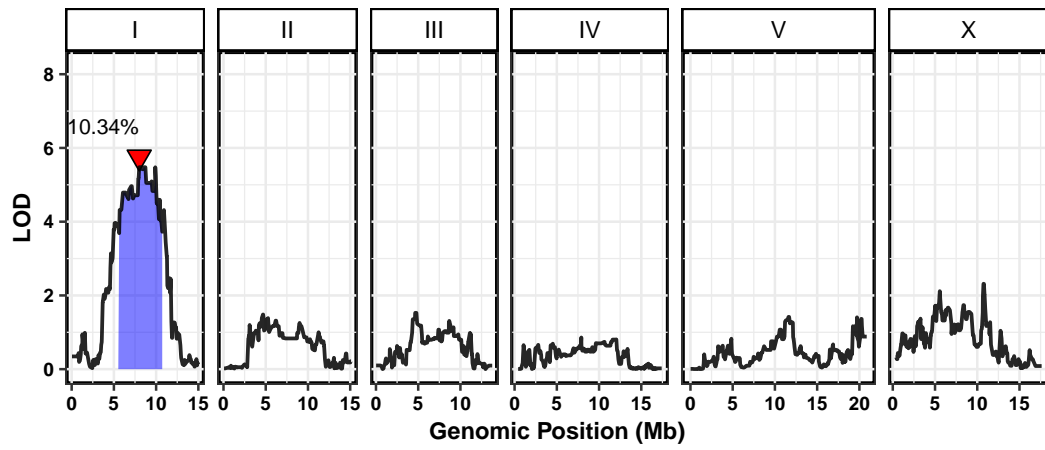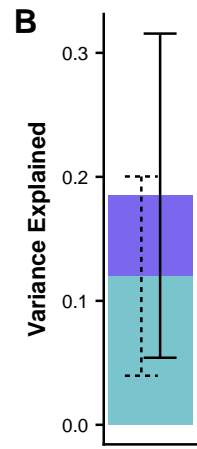

### C I:7997352

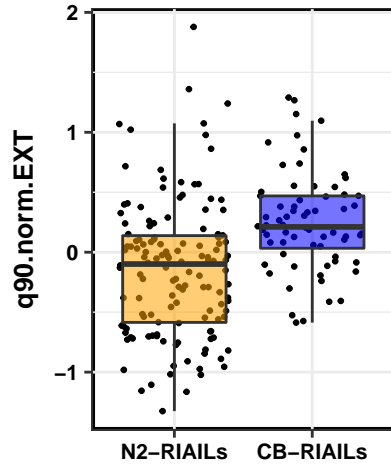

### A vincristine.q90.TOF

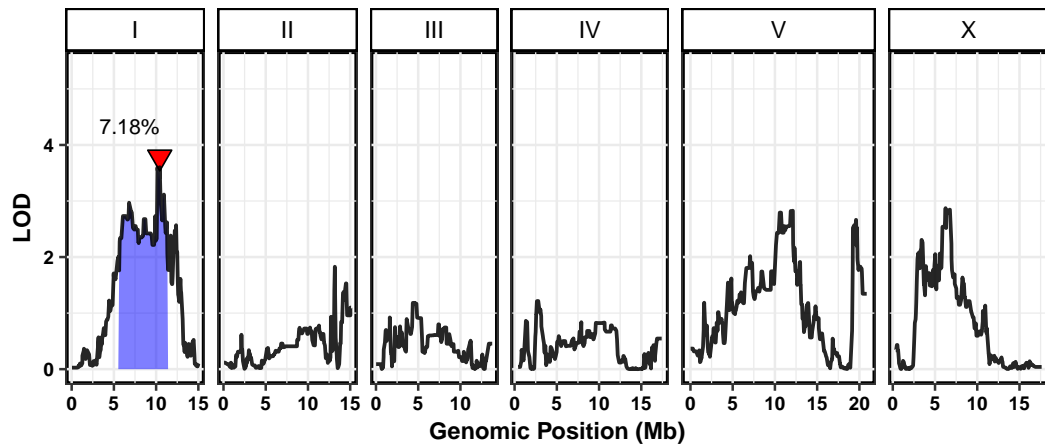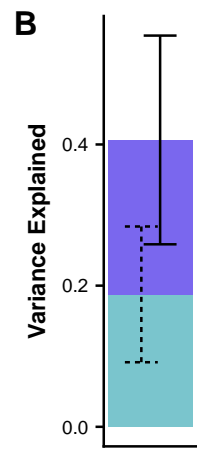

### C I:10427208

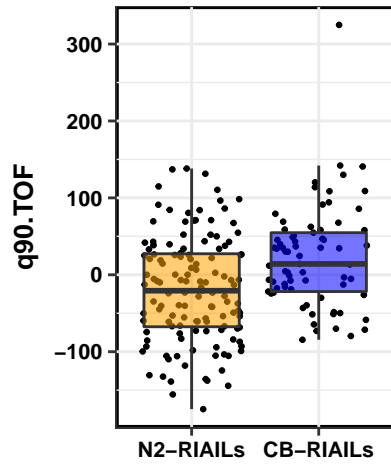

**Figure S2** QTL linkage mapping, CSS and NIL results, and variance component contributions. **(A)** The maximum LOD score (*y*-axis) for each marker across the genome (*x*-axis), split by chromosome, is plotted as a black line. Significant QTL are indicated by a red triangle at the marker with the maximum LOD score and a light blue ribbon spanning the 95% confidence interval. The estimated phenotypic variation in the RIALs explained by each QTL is indicated above each peak. **(B)** The proportion of phenotypic variation across the RIALs caused by additive (light blue) and interactive (dark blue) genetic components are indicated. Solid and dashed error bars show the standard error around additive and interactive component estimates, respectively. **(C)** For each QTL plotted in A, the residual phenotypes (*y*-axis) of RIALs split by genotype at the marker with the maximum LOD score (*x*-axis) are plotted as Tukey box plots. Data from RIALs with the N2 or the CB4856 allele at the QTL peak marker are colored in orange and blue, respectively. **(D and E)** For traits in which CSSs and NILs were assayed, the residual phenotypic values (*y*-axis) of N2, CB4856, and reciprocal introgressed CSSs (**D**) or NILs (**E**) are plotted as Tukey box plots. Different letters represent significant differences ( $p < 0.05$ ) between strains (Tukey HSD). The genotype of each strain on the *x*-axis is modeled by the colored rectangles beneath the plots (N2 genotypes are orange, CB4856 genotypes are blue).

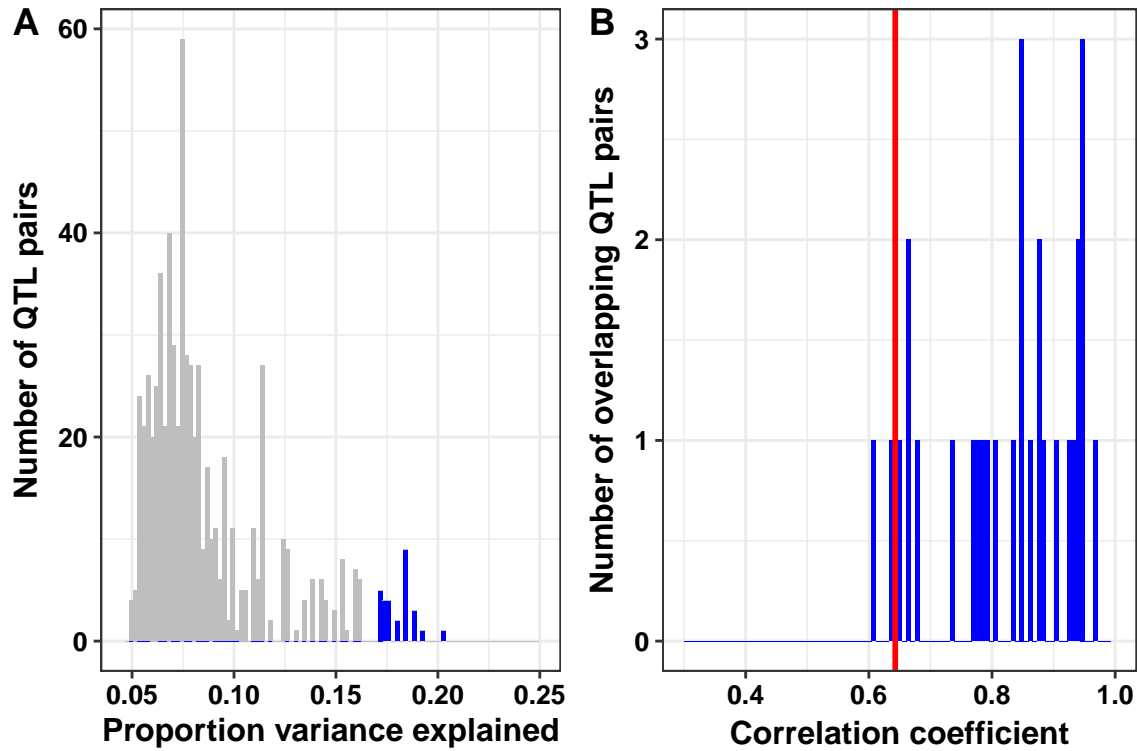

**Figure S3** Determining a threshold for identifying distinct QTL. **(A)** Within each condition, pairs of traits with overlapping QTL confidence intervals are plotted as a histogram. The phenotypic variation explained by the lowest effect-size QTL per pair of overlapping confidence intervals is shown on the x-axis. Pairs of QTL with a variance explained estimate above the 95<sup>th</sup> percentile of this distribution are colored in blue. **(B)** A histogram of all pairs of traits with overlapping confidence intervals containing a QTL with a variance explained estimate above the cutoff from (A). The correlation coefficient of each of pair of traits, calculated from the dose-response data, is shown on the x-axis. The 5<sup>th</sup> percentile of this distribution is indicated by the red line at a correlation coefficient of 0.642.

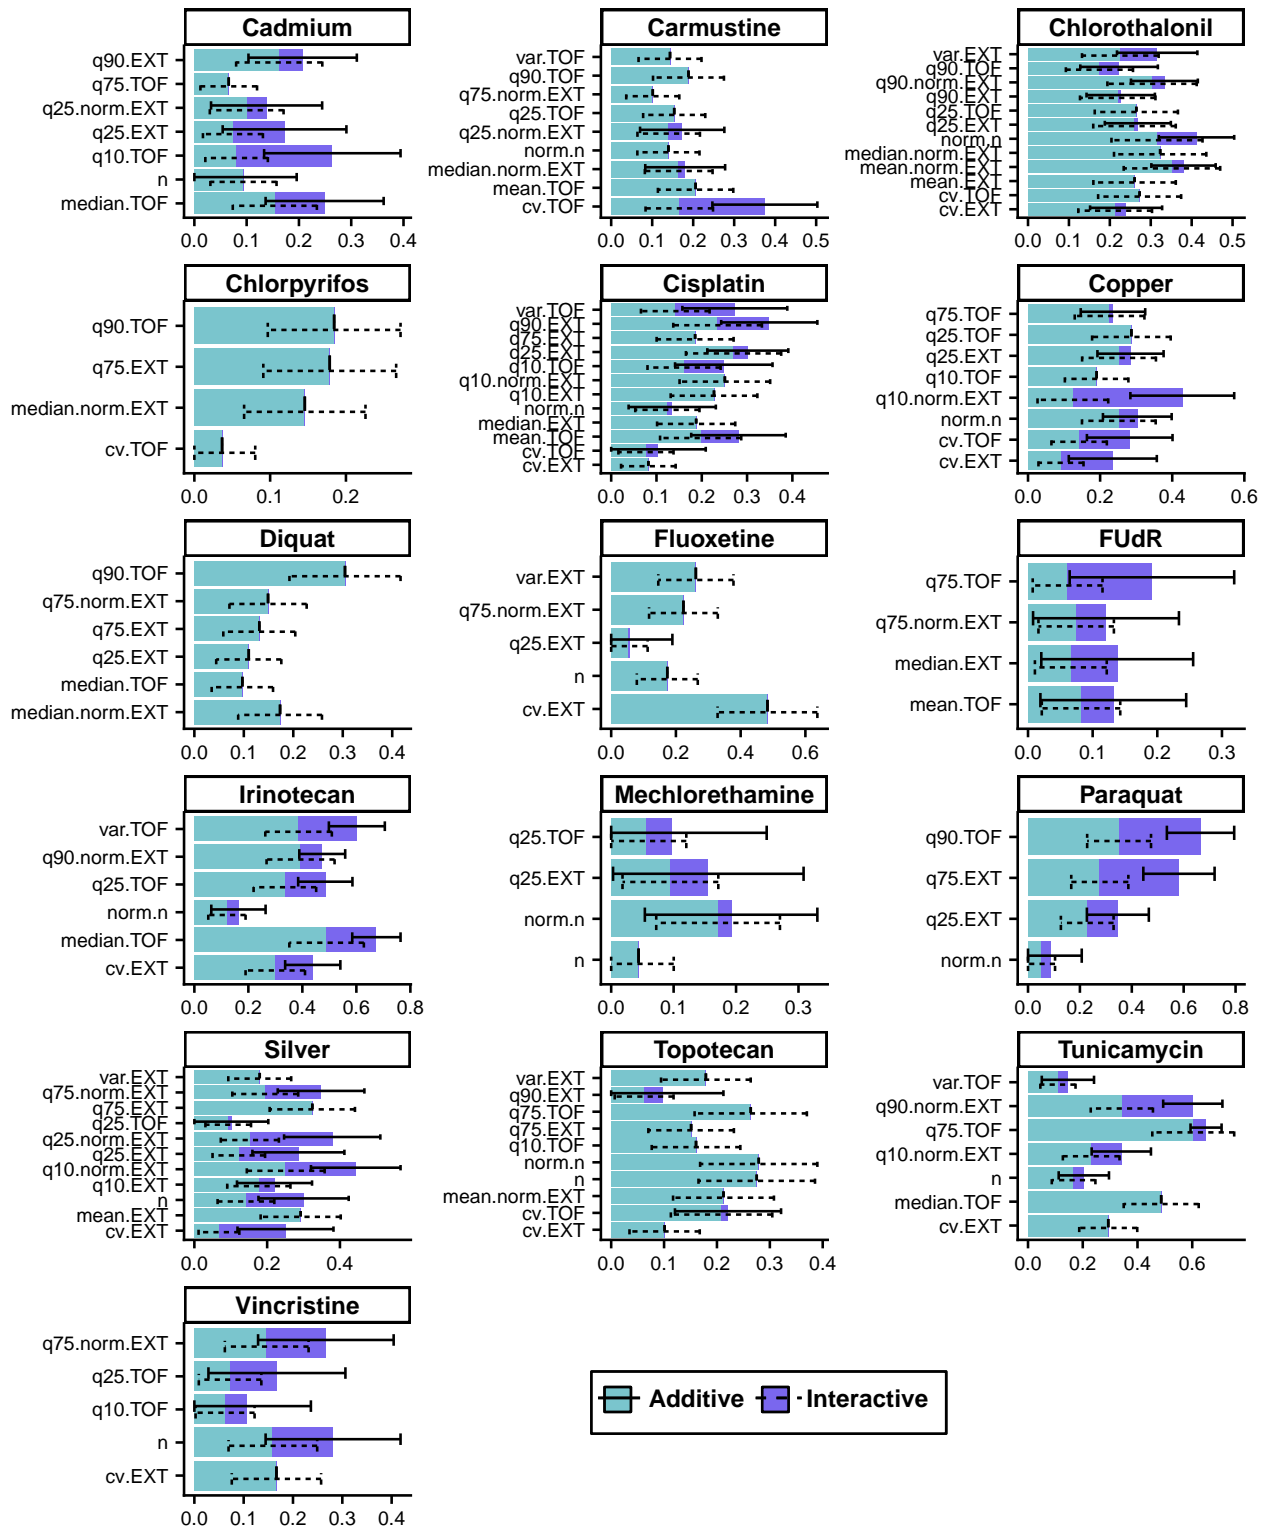

**Figure S4** Additive and interactive genetic components. The proportion of phenotypic variation predicted to be caused by additive and interactive genetic components is shown for each trait that represents one of the 114 distinct QTL identified by linkage mapping. For each toxin, the fraction of phenotypic variation (x-axis) in a given trait (y-axis) that is attributable to additive (light blue) versus interactive (dark blue) genetic components is shown as a stacked bar plot. Solid and dashed error bars show the standard error around the mean of additive and interactive components, respectively.

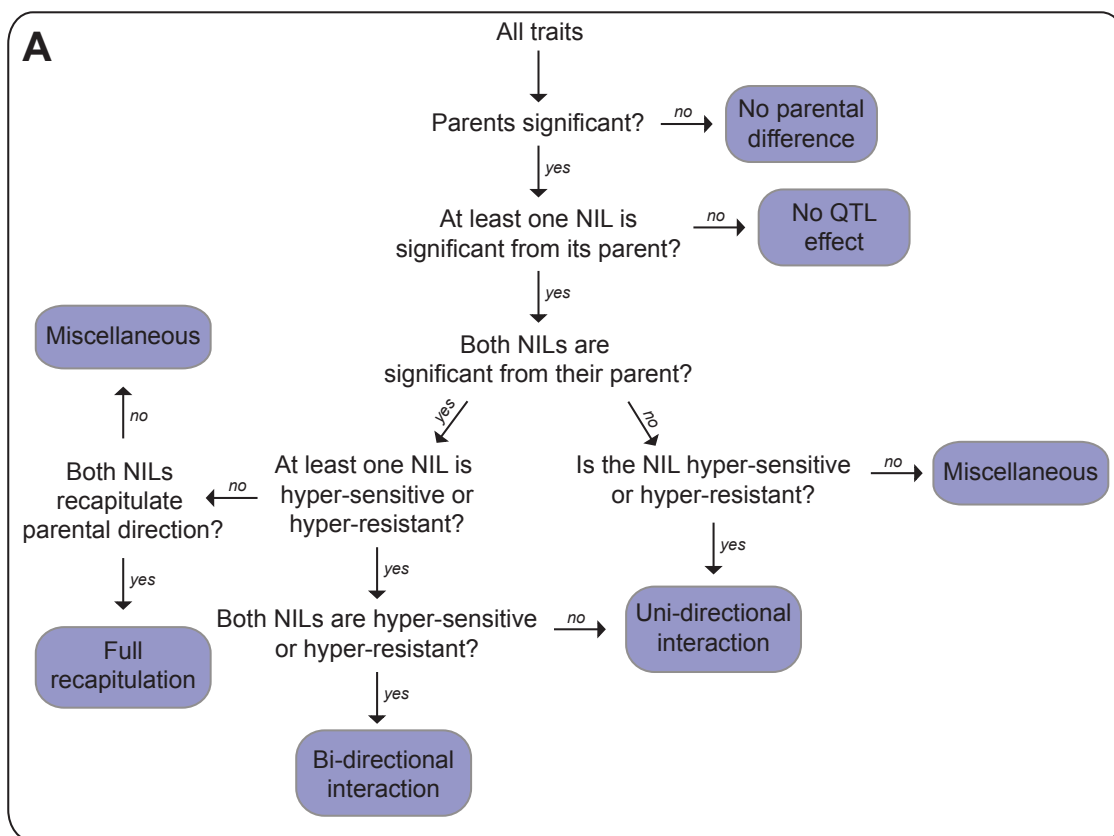

**B**

| Category                               | CSS                                           | NIL                                           |
|----------------------------------------|-----------------------------------------------|-----------------------------------------------|
| Full recapitulation                    | Full recapitulation                           | Full recapitulation                           |
| No parental effect                     | No parental difference                        | No parental difference                        |
| No QTL effect                          | No QTL effect                                 | No QTL effect                                 |
| Inter-chromosomal external interaction | Uni-directional or bi-directional interaction | Full recapitulation or no QTL effect          |
| Inter-chromosomal internal interaction | Uni-directional or bi-directional interaction | Uni-directional or bi-directional interaction |
| Intra-chromosomal interaction          | Full recapitulation or no QTL effect          | Uni-directional or bi-directional interaction |

**Figure S5** NIL and CSS trait categorizations. **(A)** Flowchart for categorizing traits from the NIL or CSS phenotyping assays. **(B)** Six categories across both CSS and NIL assays for traits on chromosome V. The miscellaneous category is not depicted, but encompasses any other combination of NIL and CSS assay results.

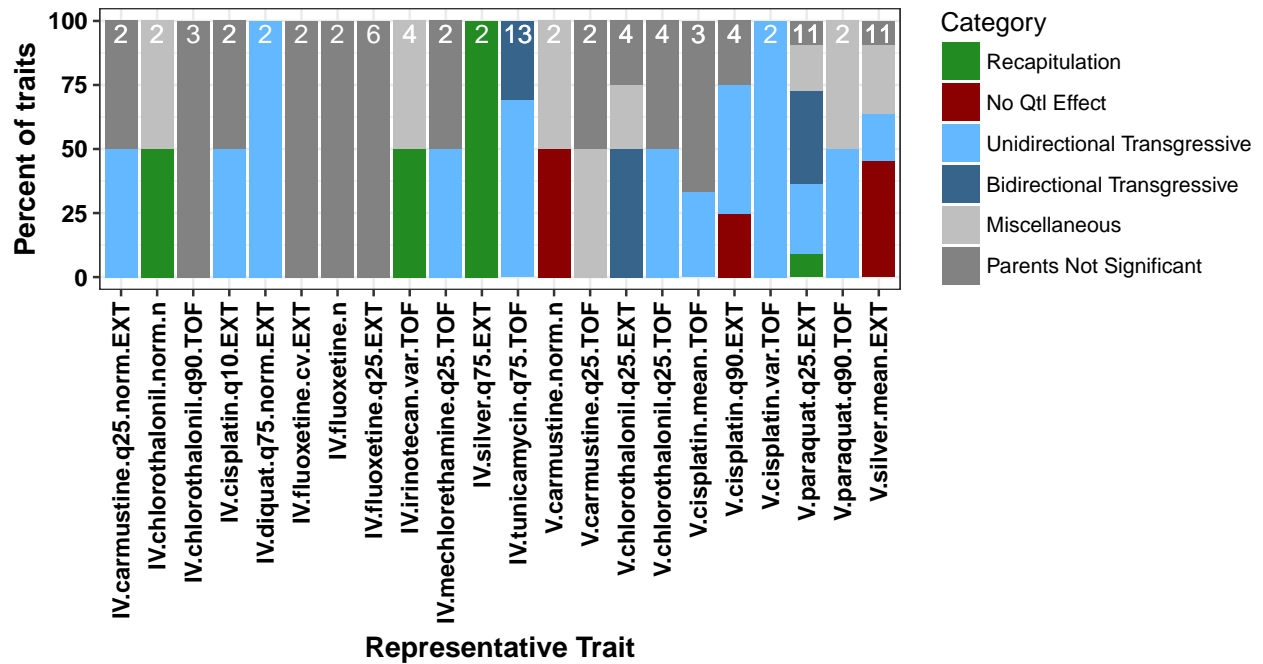

**Figure S6** Categorization of correlated traits. The x-axis shows the representative trait (the trait with the highest LOD score) of a cluster of correlated traits with overlapping QTL confidence intervals. Each color represents the NIL assay categorization for each trait within a correlation cluster - either recapitulation (green), no QTL effect (red), unidirectional transgressive phenotype (light blue), bidirectional transgressive phenotype (dark blue), miscellaneous (light grey) or no significant parental difference (dark grey). The percent of all traits within the correlation cluster that falls within a given category is shown on the y-axis. Numbers above each bar indicate the number of traits within a correlation cluster.
